# Supplementary material for: Analysis of microRNA-target interactions across diverse cancer types
Source: PubMed Central journal article supplement — Nat Struct Mol Biol. Author manuscript; Available in PMC 2014 Apr 10. (PMC3982325; doi:10.1038/nsmb.2678), 2013-10-06
Supplement: NIHMS550195-supplement-1.pdf [file NIHMS550195-supplement-1.pdf]

## Supplemental Figure 1

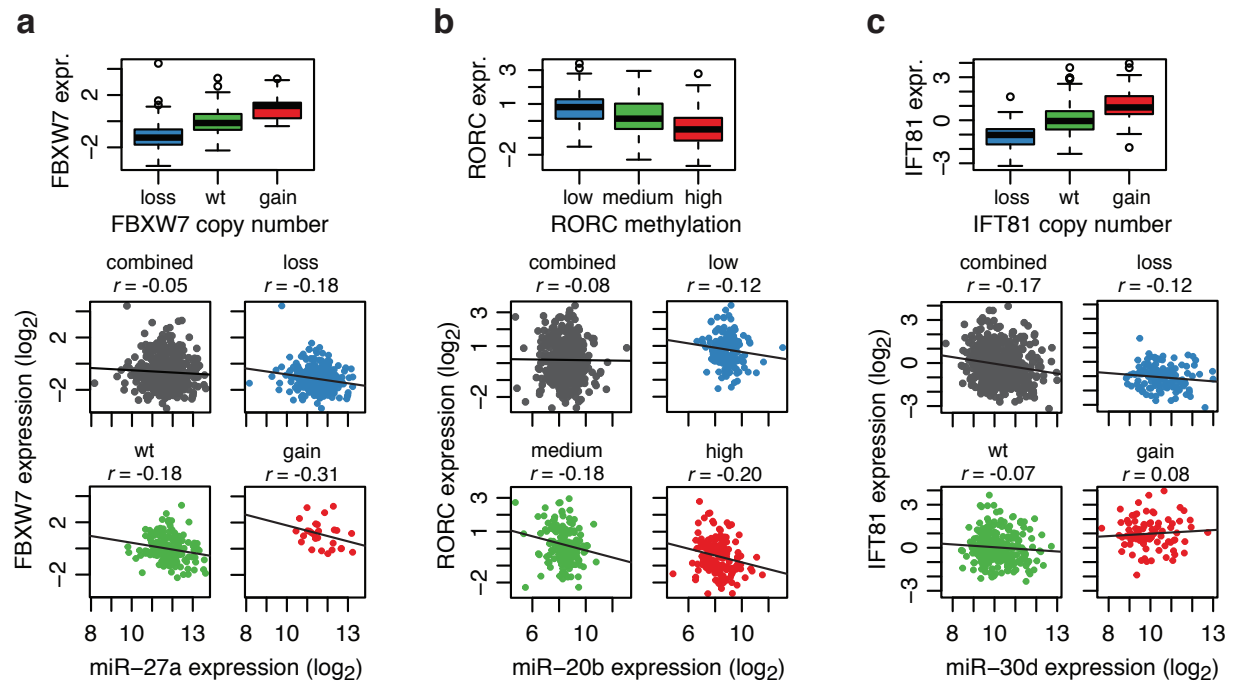

**Examples demonstrating confounding effects in statistical evaluation of miRNA-mRNA expression association when DNA copy number and promoter methylation aberrations extensively influence mRNA expression levels.** (a) FBXW7 is a validated target of miR-27a (Hafner et al. 2010, Lerner et al. 2011). FBXW7 mRNA expression levels are strongly influenced by DNA copy number aberrations in the serous ovarian carcinoma dataset (OVA). A pairwise correlation test could not detect a negative association between miR-27a and FBXW7 expression levels (Pearson  $r = -0.05$ ,  $P = 0.21$ ), but the multivariate linear model also factoring in FBXW7 copy number changes detected a significant negative association ( $P = 6.8e-6$ ). (b) RORC is an evolutionarily conserved target of miR-20b (TargetScan). RORC mRNA expression levels are strongly influenced by promoter DNA methylation aberrations in the serous ovarian carcinoma dataset (OVA). A pairwise correlation test could not detect a negative association between miR-20b and RORC expression levels (Pearson  $r = -0.08$ ,  $P = 0.07$ ), but the multivariate linear model also factoring in RORC DNA methylation levels detected a significant negative association ( $P = 6.5e-6$ ). (c) IFT81 is not a predicted target of miR-30d. IFT81 mRNA expression levels are strongly influenced by promoter DNA methylation aberrations in the serous ovarian carcinoma dataset (OVA). A pairwise correlation test detected a significant negative association between miR-30d and IFT81 expression levels (Pearson  $r = -0.17$ ,  $P = 8.7e-5$ ), but the multivariate linear model also factoring in RORC DNA methylation levels found no association between miR-30d and IFT81 ( $P = 0.08$ ).

## Supplemental Figure 2

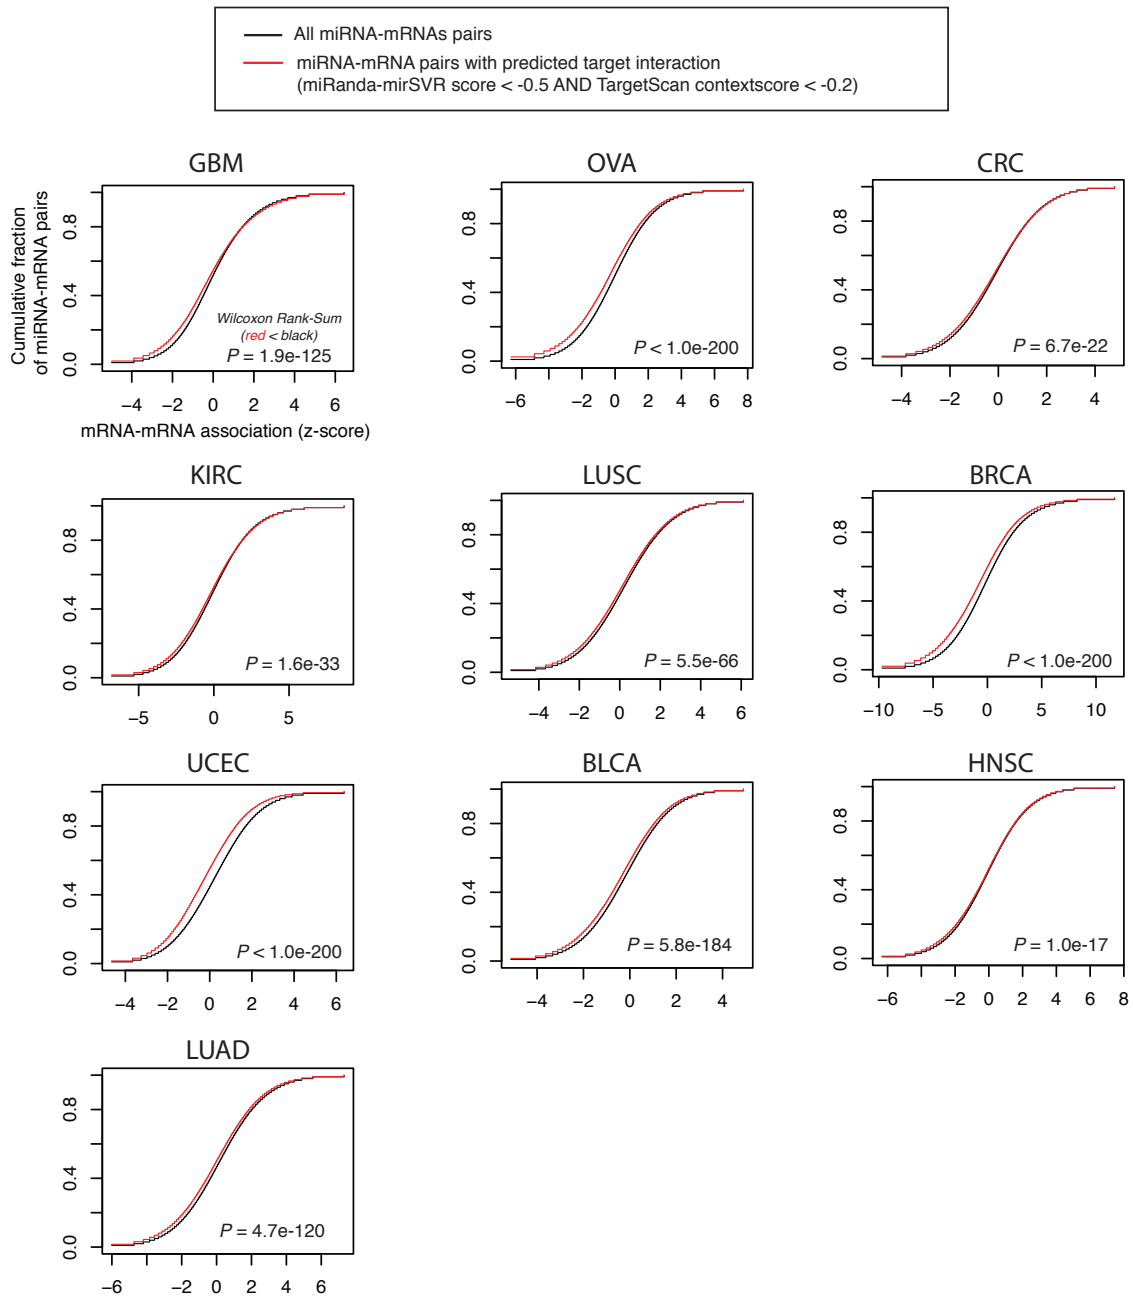

**Cumulative distribution plots showing the relationship between predicted miRNA-mRNA target interactions and miRNA-mRNA expression association in TCGA data.**

## **Supplemental Note**

Detailed description of statistical methods.

## Recurrent microRNA target interactions across diverse cancer types

Anders Jacobsen (1), Joachim Silber (2), Girish Harinath (2), Jason T. Huse (2), Nikolaus Schultz (1), Chris Sander (1), The Cancer Genome Atlas Network (3)

(1) Computational Biology Center, (2) Department of Pathology and Human Oncology and Pathogenesis Program, Memorial Sloan-Kettering Cancer Center, New York, NY 10065, USA, (3) 31 Center Drive, 3A20, Bethesda, Maryland 20814

### *Statistical evaluation of pairwise miRNA-mRNA expression association*

To avoid measuring associations related to cis-regulation of neighboring miRNAs and mRNAs (for example through regional epigenetic regulation or DNA copy number aberrations), we evaluated expression association only for pairs of miRNAs and mRNAs that were on different chromosomes or that were more than 10 Mb apart on the same chromosome. Alterations in gene DNA copy number and promoter DNA methylation will likely alter the mRNA expression level of a given gene and may introduce noise when evaluating a possible post-transcriptional regulatory interaction between a given pair of miRNA  $\mu$  and the mRNA  $j$ . To account for such effects, we used a multivariate linear regression model where mRNA  $j$  expression (log2),  $y$ , change as a linear function of DNA copy number (log2 tumor/normal ratio),  $x_{CN}$ , DNA methylation (beta value, [0,1]),  $x_{Me}$ , and miRNA  $\mu$  expression (log2),  $x_{\mu}$ , in the  $n$  tumor samples of a given cancer type:

$$y = X\beta + \varepsilon$$

$$y_i = \beta_0 + \beta_{CN}x_{CN,i} + \beta_{Me}x_{Me,i} + \beta_{\mu}x_{\mu,i} + \varepsilon_i \quad , i = 1, \dots, n$$

In this linear model,  $\beta_0$  is the intercept,  $\beta_{CN}$ ,  $\beta_{Me}$  and  $\beta_{\mu}$  are the regression coefficients for the copy number, methylation and miRNA expression variables respectively.  $\varepsilon \sim N(0, \sigma^2 I)$  is a normally distributed error term. We use the ordinary least squares method to obtain an estimate for the miRNA coefficient,  $\hat{\beta}_{\mu}$ , and test the null hypothesis

that the expression level of miRNA  $\mu$  is not associated with change in expression of mRNA  $j$ . This hypothesis can be evaluated by a t-statistic with  $n-4$  degrees of freedom:

$$H_0: \beta_\mu = 0, \quad t = \frac{\hat{\beta}_\mu}{se(\hat{\beta}_\mu)}$$

We estimate  $\hat{\beta}_\mu$  using ordinary least squares regression, and the standard error,  $se(\hat{\beta}_\mu)$ , is computed from the corresponding diagonal element of the variance-covariance matrix of  $\hat{\beta}$ :

$$se(\hat{\beta}_i) = \sqrt{Var(\hat{\beta})_{ii}} \quad , \quad Var(\hat{\beta}) = (\mathbf{X}^T \mathbf{X})^{-1} \sigma^2$$

Let  $\hat{y}_i$  denote the fitted mRNA expression values, then the residual variance is estimated by:

$$\hat{\sigma}^2 = \frac{\sum_{i=1}^n (y_i - \hat{y}_i)^2}{N - 4}$$

### ***Statistical evaluation of miRNA-mRNA association recurrence across multiple cancer types***

To evaluate the recurrence of a given miRNA-mRNA association across multiple cancer types we had to combine the associations measured in each individual cancer dataset. The  $p$ -value computed for individual cancer types using the linear regression model above might strongly bias associations found in single studies with large sample sizes. We also observed that the distribution of associations found for individual ubiquitously and highly expressed miRNAs varied notably between different cancer studies, which could for example be due to study dependent confounding effects such as differences in tumor heterogeneity between cancer types or the purity of tumor samples used for a given study. To account for these types of bias, we used a rank-based statistic to

evaluate the relative strength of associations in the context of a specific miRNA and cancer type. Let  $L_{\mu,k}$  be the ordered (from negative to positive association) vector of associations involving miRNA  $\mu$  in cancer type  $k$ . The strength of the association between miRNA  $\mu$  and mRNA  $j$  in cancer type  $k$  is defined by the relative rank:

$$rr_{j,\mu,k} = \frac{r_{j,\mu,k}}{|L_{\mu,k}|} - \frac{1}{2|L_{\mu,k}|}$$

Here  $r_{j,\mu,k}$  is the rank of the association between miRNA  $\mu$  and mRNA  $j$  in the vector  $L_{\mu,k}$ . The last term is subtracted so that  $rr_{j,\mu,k}$  is uniformly distributed on the interval  $[0,1]$  but does not take values 0 or 1. Under the null hypothesis that that no negative association exists between miRNA  $\mu$  and mRNA  $j$  across all  $n$  cancer types, we would expect the negative logarithm of the product of these uniformly distributed relative ranks to approximately follow a chi-squared distribution with  $2 \times n$  degrees of freedom. This follows from Fisher's method<sup>1</sup>, which is defined for the product of a family of independent  $p$ -values evaluating the same overall hypothesis:

$$H_0: -2 \sum_k \ln(rr_{j,\mu,k}) \sim X_{2n}^2$$

We found that the  $p$ -values computed by the chi-squared test were very similar to  $p$ -values computed by a permutation test (data now shown), however a permutation test is computationally intensive and may be ill-suited for evaluating very strong associations with correspondingly low  $p$ -values, which is especially important in a large-scale multiple testing situation. The chi-squared test evaluates the one-sided null hypothesis that no negative association exists between miRNA-mRNA pairs, the alternative one-sided hypothesis is evaluated by the same test using the inverted ranks ( $|L_{\mu,k}| - r_{j,\mu,k} + 1$ ), and the two one-sided  $p$ -values,  $p_-$  and  $p_+$ , are multiplied by a factor 2 to adjust for multiple testing. For a given pair of miRNA  $\mu$  and mRNA  $j$  with measurements in at least

half of the cancer types ( $\geq 5$ ), we define the cross-cancer association recurrence score, REC, as the signed logarithm of these  $p$ -values:

$$REC_{\mu,j} = \begin{cases} \log_{10}(2 \times p_-) & , \text{if } p_- < p_+ \\ -\log_{10}(2 \times p_+) & , \text{if } p_+ < p_- \\ 0 & , \text{if } p_- = p_+ \end{cases}$$

To address the multiple testing problem, we sorted  $p$ -values for associations of all  $N$  miRNA-mRNA pairs in ascending order, and used the Benjamini-Hochberg method to estimate the proportion of false discoveries for the  $p$ -value at index  $i$ <sup>36</sup>:

$$q_{(i)} = \left\{ p_{(i)} \frac{N}{i}, q_{(i+1)} \right\}_{\min}$$

## **References**

1. Fisher, R. A. Combining independent tests of significance. *The American Statistician* **2**, 30–31 (1948).

## **Supplemental Table 1**

Inferred pan-cancer candidate miRNA target interactions.



Anders Jacobsen (1), Joachim Silber (2), Girish Harinath (2), Jason T. Huse (2), Nikolaus Schultz (1), Chris Sander (1), The Cancer Genome Atlas Network (3)

(1) Computational Biology Center, (2) Department of Pathology and Human Oncology and Pathogenesis Program, Memorial Sloan-Kettering Cancer Center, New York, NY 10065, USA, (3) 31 Center Drive, 3A20, Bethesda, Maryland 20814

miRNA-mRNA pairs significantly associated across all cancer types (REC score < -6.2 , FDR < 2e-4). Interactions in the pan-cancer network are further required to have predicted target interaction by miRanda-miRSVR (score < -0.5) AND TargetScan (contextscore < -0.2), and must also have strong evidence for conservation (Targetscan pct score > 0.5).

| miRNA        | mRNA     | REC score | miRanda-miRSVR | Targetscan contextscore | Targetscan pct score (conservation) | Evolutionarily conserved interactions included in pan-cancer network |
|--------------|----------|-----------|----------------|-------------------------|-------------------------------------|----------------------------------------------------------------------|
| hsa-miR-29b  | NREP     | -19.62    | 1.23           | 0.37                    | 0.87                                | TRUE                                                                 |
| hsa-miR-30b  | SEC23A   | -15.35    | 1.93           | 0.60                    | 0.89                                | TRUE                                                                 |
| hsa-miR-29a  | TDG      | -14.85    | 2.41           | 0.59                    | 0.75                                | TRUE                                                                 |
| hsa-miR-29a  | TAF11    | -12.60    | 1.66           | 0.54                    | 0.51                                | TRUE                                                                 |
| hsa-miR-200c | ZCCHC24  | -11.20    | 0.92           | 0.36                    | 0.92                                | TRUE                                                                 |
| hsa-miR-200c | ZEB1     | -10.83    | 5.39           | 0.79                    | 0.95                                | TRUE                                                                 |
| hsa-miR-429  | ZEB1     | -10.82    | 5.43           | 0.79                    | 0.95                                | TRUE                                                                 |
| hsa-miR-30c  | FAP      | -10.66    | 1.30           | 0.50                    | 0.69                                | TRUE                                                                 |
| hsa-miR-22   | PRPF38A  | -10.58    | 0.68           | 0.43                    | 0.82                                | TRUE                                                                 |
| hsa-miR-19a  | ZBTB4    | -10.52    | 1.89           | 0.42                    | 0.97                                | TRUE                                                                 |
| hsa-miR-18a  | CREBL2   | -10.51    | 1.03           | 0.47                    | 0.57                                | TRUE                                                                 |
| hsa-miR-106a | AHNAK    | -10.51    | 1.35           | 0.46                    | 0.93                                | TRUE                                                                 |
| hsa-miR-29b  | UBTD2    | -10.06    | 0.64           | 0.24                    | 0.80                                | TRUE                                                                 |
| hsa-miR-200c | ZFPM2    | -10.00    | 2.13           | 0.77                    | 0.80                                | TRUE                                                                 |
| hsa-miR-29b  | TET1     | -9.96     | 1.67           | 0.69                    | 1.00                                | TRUE                                                                 |
| hsa-miR-130a | ACBD5    | -9.92     | 1.25           | 0.51                    | 0.72                                | TRUE                                                                 |
| hsa-miR-429  | ZEB2     | -9.91     | 6.72           | 2.13                    | 1.00                                | TRUE                                                                 |
| hsa-miR-106a | FYCO1    | -9.86     | 1.81           | 1.04                    | 0.98                                | TRUE                                                                 |
| hsa-miR-32   | MSRB3    | -9.80     | 0.59           | 0.57                    | 0.88                                | TRUE                                                                 |
| hsa-miR-106b | TGFBR2   | -9.80     | 1.52           | 0.65                    | 0.97                                | TRUE                                                                 |
| hsa-miR-135b | C6orf120 | -9.73     | 1.27           | 0.45                    | 0.92                                | TRUE                                                                 |
| hsa-miR-17   | FYCO1    | -9.67     | 1.81           | 1.04                    | 0.98                                | TRUE                                                                 |
| hsa-miR-130b | ZBTB4    | -9.66     | 1.78           | 0.39                    | 0.94                                | TRUE                                                                 |
| hsa-miR-19a  | ARHGAP1  | -9.50     | 0.71           | 0.22                    | 0.90                                | TRUE                                                                 |
| hsa-miR-200c | LHFP     | -9.43     | 2.54           | 0.78                    | 0.74                                | TRUE                                                                 |
| hsa-miR-26a  | SFXN1    | -9.39     | 1.22           | 0.39                    | 0.75                                | TRUE                                                                 |
| hsa-miR-200b | RECK     | -9.28     | 2.61           | 0.95                    | 0.95                                | TRUE                                                                 |
| hsa-miR-429  | ZFPM2    | -9.26     | 2.11           | 0.77                    | 0.80                                | TRUE                                                                 |

|                |         |       |      |      |      |      |
|----------------|---------|-------|------|------|------|------|
| hsa-miR-106b   | FYCO1   | -9.23 | 1.81 | 1.04 | 0.98 | TRUE |
| hsa-miR-200b   | ZEB1    | -9.23 | 5.40 | 0.79 | 0.95 | TRUE |
| hsa-miR-29a    | NREP    | -9.19 | 1.23 | 0.37 | 0.87 | TRUE |
| hsa-miR-30d    | SEC23A  | -9.18 | 1.93 | 0.60 | 0.89 | TRUE |
| hsa-miR-200c   | RECK    | -9.10 | 2.60 | 0.95 | 0.95 | TRUE |
| hsa-miR-200b   | ZFPM2   | -9.09 | 2.13 | 0.77 | 0.80 | TRUE |
| hsa-miR-200b   | SYDE1   | -8.92 | 1.02 | 0.34 | 0.91 | TRUE |
| hsa-miR-106b   | AHNAK   | -8.83 | 1.35 | 0.46 | 0.93 | TRUE |
| hsa-miR-26a    | MAPK6   | -8.75 | 1.37 | 0.52 | 0.64 | TRUE |
| hsa-miR-29c    | NREP    | -8.71 | 1.23 | 0.37 | 0.87 | TRUE |
| hsa-miR-30d    | FAP     | -8.63 | 1.30 | 0.50 | 0.69 | TRUE |
| hsa-miR-17     | ZBTB4   | -8.61 | 1.67 | 0.54 | 0.98 | TRUE |
| hsa-miR-200b   | ZCCHC24 | -8.54 | 0.92 | 0.36 | 0.92 | TRUE |
| hsa-miR-429    | SEC23A  | -8.52 | 3.08 | 0.84 | 0.91 | TRUE |
| hsa-miR-106a   | ZNFX1   | -8.46 | 2.78 | 1.17 | 1.00 | TRUE |
| hsa-miR-429    | OSTM1   | -8.34 | 1.40 | 0.65 | 0.57 | TRUE |
| hsa-miR-200b   | SEC23A  | -8.34 | 2.61 | 0.84 | 0.91 | TRUE |
| hsa-miR-200a   | ZEB2    | -8.34 | 3.35 | 1.05 | 0.83 | TRUE |
| hsa-miR-106a   | SYNE1   | -8.33 | 1.09 | 0.33 | 0.65 | TRUE |
| hsa-miR-29c    | TET1    | -8.28 | 1.71 | 0.69 | 1.00 | TRUE |
| hsa-miR-30d    | CTHRC1  | -8.24 | 1.18 | 0.47 | 0.61 | TRUE |
| hsa-miR-30a    | MYBL2   | -8.24 | 0.71 | 0.32 | 0.82 | TRUE |
| hsa-miR-20a    | FYCO1   | -8.20 | 1.81 | 1.04 | 0.98 | TRUE |
| hsa-miR-17     | EFCAB14 | -8.18 | 1.64 | 0.52 | 0.99 | TRUE |
| hsa-miR-429    | RECK    | -8.15 | 2.77 | 0.95 | 0.95 | TRUE |
| hsa-miR-20a    | CTSA    | -8.08 | 0.94 | 0.37 | 0.71 | TRUE |
| hsa-miR-30c    | SEC23A  | -8.00 | 1.93 | 0.60 | 0.89 | TRUE |
| hsa-miR-106a   | EFCAB14 | -7.96 | 1.64 | 0.52 | 0.99 | TRUE |
| hsa-miR-141    | ZEB2    | -7.85 | 3.34 | 1.05 | 0.83 | TRUE |
| hsa-miR-17     | ARHGAP1 | -7.84 | 1.11 | 0.33 | 0.90 | TRUE |
| hsa-miR-106b   | ZBTB4   | -7.77 | 1.67 | 0.54 | 0.98 | TRUE |
| hsa-miR-200b   | CRTAP   | -7.76 | 0.51 | 0.45 | 0.77 | TRUE |
| hsa-miR-429    | MCFD2   | -7.75 | 2.05 | 0.96 | 0.68 | TRUE |
| hsa-miR-429    | ZCCHC24 | -7.73 | 0.93 | 0.36 | 0.92 | TRUE |
| hsa-miR-200b   | OSTM1   | -7.67 | 1.36 | 0.65 | 0.57 | TRUE |
| hsa-miR-20a    | ARHGAP1 | -7.59 | 1.11 | 0.33 | 0.90 | TRUE |
| hsa-miR-106b   | MMP2    | -7.57 | 1.13 | 0.46 | 0.55 | TRUE |
| hsa-miR-106b   | ARHGAP1 | -7.53 | 1.11 | 0.33 | 0.90 | TRUE |
| hsa-miR-106b   | JAK1    | -7.48 | 1.11 | 0.35 | 0.90 | TRUE |
| hsa-miR-106b   | SYNE1   | -7.47 | 1.09 | 0.33 | 0.65 | TRUE |
| hsa-miR-142-3p | MYH10   | -7.43 | 1.10 | 0.32 | 0.84 | TRUE |
| hsa-miR-130b   | ARHGAP1 | -7.41 | 1.00 | 0.36 | 0.89 | TRUE |
| hsa-miR-429    | WIPF1   | -7.41 | 3.56 | 1.04 | 0.99 | TRUE |
| hsa-miR-30a    | TDG     | -7.39 | 0.69 | 0.28 | 0.86 | TRUE |
| hsa-miR-429    | CRTAP   | -7.36 | 0.52 | 0.45 | 0.77 | TRUE |

|              |           |       |      |      |      |      |
|--------------|-----------|-------|------|------|------|------|
| hsa-miR-27a  | CCNG1     | -7.31 | 1.23 | 0.60 | 0.77 | TRUE |
| hsa-miR-19b  | ARHGAP1   | -7.30 | 0.71 | 0.22 | 0.90 | TRUE |
| hsa-miR-301a | ARHGAP1   | -7.27 | 0.99 | 0.36 | 0.89 | TRUE |
| hsa-miR-200a | TSHZ3     | -7.25 | 1.96 | 0.55 | 0.52 | TRUE |
| hsa-miR-106b | EFCAB14   | -7.21 | 1.66 | 0.52 | 0.99 | TRUE |
| hsa-miR-200b | ZEB2      | -7.20 | 6.73 | 2.13 | 1.00 | TRUE |
| hsa-miR-200c | SYDE1     | -7.15 | 1.02 | 0.34 | 0.91 | TRUE |
| hsa-miR-29c  | WASF1     | -7.12 | 0.89 | 0.23 | 0.58 | TRUE |
| hsa-miR-30b  | FAP       | -7.09 | 1.30 | 0.50 | 0.69 | TRUE |
| hsa-miR-148a | MTMR9     | -7.07 | 0.58 | 0.72 | 0.96 | TRUE |
| hsa-miR-141  | TSHZ3     | -7.00 | 1.96 | 0.55 | 0.52 | TRUE |
| hsa-miR-93   | SYNE1     | -6.99 | 1.09 | 0.33 | 0.65 | TRUE |
| hsa-miR-17   | CTSA      | -6.99 | 0.94 | 0.37 | 0.71 | TRUE |
| hsa-miR-429  | MYLK      | -6.95 | 1.35 | 0.39 | 0.58 | TRUE |
| hsa-miR-15b  | SPRYD3    | -6.94 | 0.53 | 0.47 | 0.96 | TRUE |
| hsa-miR-30e  | SEC23A    | -6.91 | 1.92 | 0.60 | 0.89 | TRUE |
| hsa-miR-29b  | TDG       | -6.88 | 2.41 | 0.59 | 0.75 | TRUE |
| hsa-miR-93   | TGFBR2    | -6.87 | 1.52 | 0.65 | 0.97 | TRUE |
| hsa-miR-200c | KANK2     | -6.87 | 0.73 | 0.36 | 0.91 | TRUE |
| hsa-miR-200a | NRP1      | -6.85 | 1.09 | 0.37 | 0.74 | TRUE |
| hsa-miR-106a | CRIM1     | -6.84 | 1.27 | 0.24 | 0.76 | TRUE |
| hsa-miR-200b | TIMP2     | -6.84 | 1.10 | 0.60 | 0.87 | TRUE |
| hsa-miR-106a | ZBTB4     | -6.80 | 1.67 | 0.54 | 0.98 | TRUE |
| hsa-miR-200c | FSTL1     | -6.77 | 0.50 | 0.25 | 0.58 | TRUE |
| hsa-miR-17   | ZNFX1     | -6.76 | 2.78 | 1.17 | 1.00 | TRUE |
| hsa-let-7b   | LIN28B    | -6.71 | 1.18 | 1.12 | 1.00 | TRUE |
| hsa-miR-18a  | ESR1      | -6.70 | 1.09 | 0.68 | 0.81 | TRUE |
| hsa-miR-106b | TNS1      | -6.70 | 0.75 | 0.25 | 0.90 | TRUE |
| hsa-miR-29c  | TDG       | -6.68 | 2.41 | 0.59 | 0.75 | TRUE |
| hsa-miR-130b | ESR1      | -6.67 | 0.84 | 0.76 | 0.89 | TRUE |
| hsa-miR-106b | DAB2      | -6.64 | 1.14 | 0.29 | 0.84 | TRUE |
| hsa-miR-106a | JAK1      | -6.61 | 1.11 | 0.35 | 0.90 | TRUE |
| hsa-miR-17   | ST6GALNAC | -6.60 | 0.66 | 0.32 | 0.66 | TRUE |
| hsa-miR-16   | SPRYD3    | -6.60 | 0.57 | 0.47 | 0.96 | TRUE |
| hsa-miR-19b  | ZBTB4     | -6.60 | 1.89 | 0.42 | 0.97 | TRUE |
| hsa-miR-21   | PDCD4     | -6.57 | 1.21 | 0.44 | 0.67 | TRUE |
| hsa-miR-92a  | DNAJB9    | -6.57 | 1.48 | 0.42 | 0.96 | TRUE |
| hsa-miR-200b | LHFP      | -6.57 | 2.54 | 0.78 | 0.74 | TRUE |
| hsa-miR-30e  | ITGA5     | -6.57 | 0.91 | 0.30 | 0.69 | TRUE |
| hsa-miR-200b | MCFD2     | -6.56 | 2.04 | 0.96 | 0.68 | TRUE |
| hsa-miR-429  | SYDE1     | -6.55 | 1.02 | 0.34 | 0.91 | TRUE |
| hsa-miR-20a  | ST6GALNAC | -6.54 | 0.65 | 0.32 | 0.66 | TRUE |
| hsa-miR-20a  | EFCAB14   | -6.51 | 2.50 | 0.52 | 0.99 | TRUE |
| hsa-miR-20b  | AHNAK     | -6.51 | 1.35 | 0.46 | 0.93 | TRUE |
| hsa-miR-429  | JAZF1     | -6.50 | 1.22 | 0.43 | 0.83 | TRUE |

|                |          |          |         |        |        |       |
|----------------|----------|----------|---------|--------|--------|-------|
| hsa-miR-15b    | MYLK     | -6.49    | 1.20    | 0.45   | 0.67   | TRUE  |
| hsa-miR-29a    | TET1     | -6.45    | 1.71    | 0.69   | 1.00   | TRUE  |
| hsa-miR-30d    | MAP4K4   | -6.45    | 0.98    | 0.46   | 0.96   | TRUE  |
| hsa-miR-200b   | FSTL1    | -6.43    | 0.50    | 0.25   | 0.58   | TRUE  |
| hsa-miR-93     | RORC     | -6.42    | 1.19    | 0.36   | 0.83   | TRUE  |
| hsa-miR-200c   | OSTM1    | -6.39    | 1.62    | 0.65   | 0.57   | TRUE  |
| hsa-miR-17     | TXNIP    | -6.38    | 1.91    | 0.65   | 0.98   | TRUE  |
| hsa-miR-20a    | DAB2     | -6.37    | 1.14    | 0.29   | 0.84   | TRUE  |
| hsa-miR-429    | FEZ2     | -6.37    | 1.56    | 0.73   | 0.97   | TRUE  |
| hsa-miR-19a    | CREBL2   | -6.35    | 0.72    | 0.29   | 0.65   | TRUE  |
| hsa-miR-590-5p | TIMP3    | -6.35    | 0.57    | 0.43   | 0.78   | TRUE  |
| hsa-miR-20a    | ZBTB4    | -6.35    | 1.67    | 0.54   | 0.98   | TRUE  |
| hsa-miR-30e    | MAP4K4   | -6.34    | 0.98    | 0.46   | 0.96   | TRUE  |
| hsa-miR-17     | DAB2     | -6.33    | 1.14    | 0.29   | 0.84   | TRUE  |
| hsa-miR-30c    | PRDM1    | -6.33    | 1.73    | 0.91   | 0.97   | TRUE  |
| hsa-miR-16     | MYLK     | -6.31    | 1.20    | 0.45   | 0.67   | TRUE  |
| hsa-miR-16     | RECK     | -6.29    | 1.31    | 0.44   | 0.88   | TRUE  |
| hsa-miR-17     | ENPP5    | -6.29    | 2.50    | 0.92   | 0.98   | TRUE  |
| hsa-miR-301b   | ARHGAP1  | -6.27    | 0.99    | 0.36   | 0.89   | TRUE  |
| hsa-miR-200b   | KIAA1462 | -6.26    | 1.17    | 0.72   | 0.93   | TRUE  |
| hsa-miR-33b    | CACNA1C  | -6.25    | 0.66    | 0.41   | 0.55   | TRUE  |
| hsa-miR-19b    | EFR3A    | -6.25    | 1.07    | 0.26   | 0.53   | TRUE  |
| hsa-miR-17     | ZBTB47   | -6.23    | 0.93    | 0.23   | 0.97   | TRUE  |
| hsa-miR-30e    | P4HA2    | -6.21    | 1.14    | 0.45   | 0.51   | TRUE  |
| hsa-let-7b     | ARID3B   | -6.20    | 1.02    | 0.72   | 1.00   | TRUE  |
| hsa-miR-18a    | ZBTB4    | -15.3586 | -1.1649 | -0.243 | 0.4421 | FALSE |
| hsa-miR-31*    | STK40    | -15.1749 |         |        |        | FALSE |
| hsa-miR-31     | STK40    | -15.0814 | -0.2505 | -0.247 | 0.7637 | FALSE |
| hsa-miR-141    | ZEB1     | -15.0752 | -3.3949 |        |        | FALSE |
| hsa-miR-22     | RBMX     | -13.9982 |         |        |        | FALSE |
| hsa-miR-200c   | CNRIP1   | -13.7368 |         |        |        | FALSE |
| hsa-miR-22*    | EPC2     | -13.5189 |         |        |        | FALSE |
| hsa-miR-141    | CNRIP1   | -13.2816 | -0.5887 | -0.145 | 0.1667 | FALSE |
| hsa-miR-18a    | EFCAB14  | -12.4222 |         | -0.088 |        | FALSE |
| hsa-miR-301a   | MVP      | -12.3275 |         |        |        | FALSE |
| hsa-miR-130b   | CARD6    | -12.3266 |         |        |        | FALSE |
| hsa-miR-141    | ZCCHC24  | -12.2321 | -0.3359 | -0.514 | 0.7776 | FALSE |
| hsa-miR-200c*  | ZEB1     | -12.1198 |         |        |        | FALSE |
| hsa-miR-141    | BNC2     | -12.0933 |         | -0.436 | 0.574  | FALSE |
| hsa-miR-200c   | GLT8D2   | -11.9598 |         |        |        | FALSE |
| hsa-miR-1296   | ISG20    | -11.954  |         |        |        | FALSE |
| hsa-miR-18a    | CBX7     | -11.8581 |         | -0.116 |        | FALSE |
| hsa-miR-18a    | SSPN     | -11.8202 |         |        |        | FALSE |
| hsa-miR-379    | ULK3     | -11.8187 |         |        |        | FALSE |
| hsa-miR-141*   | ZCCHC24  | -11.711  |         |        |        | FALSE |

|                 |         |          |         |        |        |       |
|-----------------|---------|----------|---------|--------|--------|-------|
| hsa-miR-125a-5p | RRM2    | -11.7019 | -0.2392 | -0.282 | 0.0582 | FALSE |
| hsa-miR-200b*   | CNRIP1  | -11.6128 |         |        |        | FALSE |
| hsa-miR-18a     | FYCO1   | -11.5411 |         |        |        | FALSE |
| hsa-miR-141     | MSRB3   | -11.459  | -0.6411 | -0.21  | 0.3086 | FALSE |
| hsa-let-7e*     | ISG20   | -11.4326 |         |        |        | FALSE |
| hsa-miR-200a    | FAP     | -11.4175 | -0.9784 | -0.301 | 0.1737 | FALSE |
| hsa-miR-17      | TNFSF12 | -11.4137 | -0.5327 |        |        | FALSE |
| hsa-miR-200b*   | TGFB11  | -11.3592 |         |        |        | FALSE |
| hsa-miR-19a     | FYCO1   | -11.3498 |         |        |        | FALSE |
| hsa-miR-210     | EMCN    | -11.31   |         |        |        | FALSE |
| hsa-miR-200c*   | CNRIP1  | -11.2796 |         |        |        | FALSE |
| hsa-miR-200b*   | RECK    | -11.2776 |         |        |        | FALSE |
| hsa-miR-200a    | CNRIP1  | -11.2412 | -0.4332 | -0.145 | 0.1667 | FALSE |
| hsa-miR-19b-1*  | ZCCHC24 | -11.186  |         |        |        | FALSE |
| hsa-miR-200b    | FAP     | -11.1301 |         |        |        | FALSE |
| hsa-miR-183     | DPYD    | -11.1291 |         |        |        | FALSE |
| hsa-miR-200b    | EMP3    | -11.1253 |         |        |        | FALSE |
| hsa-miR-92a     | TNFSF12 | -11.1163 |         |        |        | FALSE |
| hsa-miR-200b    | CNRIP1  | -11.089  |         |        |        | FALSE |
| hsa-miR-200a*   | TGFB11  | -11.0806 |         |        |        | FALSE |
| hsa-miR-127-3p  | ULK3    | -11.055  |         |        |        | FALSE |
| hsa-miR-3614-5p | UNC119B | -11.0197 |         |        |        | FALSE |
| hsa-miR-200a    | ZEB1    | -11.0121 | -3.3988 |        |        | FALSE |
| hsa-miR-30d*    | COL5A2  | -11.004  |         |        |        | FALSE |
| hsa-miR-3614-5p | FAM172A | -10.9415 |         |        |        | FALSE |
| hsa-miR-210     | TNXB    | -10.8998 |         |        |        | FALSE |
| hsa-miR-101*    | ENTPD7  | -10.8928 |         |        |        | FALSE |
| hsa-miR-200a*   | FERMT2  | -10.8648 |         |        |        | FALSE |
| hsa-miR-200c*   | PCOLCE  | -10.862  |         |        |        | FALSE |
| hsa-miR-181c*   | SQRDL   | -10.8152 |         |        |        | FALSE |
| hsa-miR-200b*   | FERMT2  | -10.8069 |         |        |        | FALSE |
| hsa-miR-200c*   | TGFB11  | -10.7932 |         |        |        | FALSE |
| hsa-miR-7-1*    | MXRA8   | -10.7294 |         |        |        | FALSE |
| hsa-miR-30d*    | FAP     | -10.684  |         |        |        | FALSE |
| hsa-miR-30d*    | COL1A2  | -10.6683 |         |        |        | FALSE |
| hsa-miR-106b    | LRP10   | -10.6599 |         |        |        | FALSE |
| hsa-miR-30d*    | CTHRC1  | -10.6555 |         |        |        | FALSE |
| hsa-miR-29c     | TMEFF1  | -10.6322 | -1.2416 | -0.322 | 0.0187 | FALSE |
| hsa-miR-192     | PTRF    | -10.6114 |         |        |        | FALSE |
| hsa-miR-30a     | CENPE   | -10.6068 | -0.1124 |        |        | FALSE |
| hsa-miR-93      | MVP     | -10.5746 |         |        |        | FALSE |
| hsa-miR-30d*    | COL6A2  | -10.5517 |         |        |        | FALSE |
| hsa-miR-200b    | IKBIP   | -10.5328 |         |        |        | FALSE |
| hsa-miR-651     | SPARCL1 | -10.5327 |         |        |        | FALSE |
| hsa-miR-200b    | TGFB11  | -10.5233 |         |        |        | FALSE |

|                 |         |          |         |        |        |       |
|-----------------|---------|----------|---------|--------|--------|-------|
| hsa-miR-200c*   | ZCCHC24 | -10.5171 |         |        |        | FALSE |
| hsa-miR-590-5p  | SYNE1   | -10.5015 |         | -0.094 |        | FALSE |
| hsa-miR-17      | CBX7    | -10.4988 |         | -0.062 |        | FALSE |
| hsa-miR-20a     | TNFSF12 | -10.4896 | -0.5327 |        |        | FALSE |
| hsa-miR-200a    | TGFB11  | -10.4803 |         |        |        | FALSE |
| hsa-miR-22*     | RSBN1   | -10.4792 |         |        |        | FALSE |
| hsa-miR-21      | LYRM7   | -10.4744 | -0.6264 | -0.693 | 0.0574 | FALSE |
| hsa-miR-18a     | CTSO    | -10.4673 |         |        |        | FALSE |
| hsa-miR-141     | ZFPM2   | -10.4605 | -0.4754 | -0.319 | 0.1743 | FALSE |
| hsa-miR-96      | DPYD    | -10.4596 | -1.132  | -0.46  |        | FALSE |
| hsa-miR-200b*   | NEXN    | -10.4541 |         |        |        | FALSE |
| hsa-miR-200a    | MSRB3   | -10.4258 | -0.6411 | -0.21  | 0.3086 | FALSE |
| hsa-miR-212     | PGAP3   | -10.4174 |         |        |        | FALSE |
| hsa-miR-30d*    | HTRA3   | -10.417  |         |        |        | FALSE |
| hsa-miR-16-2*   | ECM2    | -10.4039 |         |        |        | FALSE |
| hsa-miR-30a*    | RRM2    | -10.3678 |         |        |        | FALSE |
| hsa-miR-181d    | SQRDL   | -10.3598 |         |        |        | FALSE |
| hsa-miR-152     | ING5    | -10.3501 |         |        |        | FALSE |
| hsa-miR-200b*   | MSRB3   | -10.3347 |         |        |        | FALSE |
| hsa-miR-200c*   | MSRB3   | -10.3283 |         |        |        | FALSE |
| hsa-miR-210     | CCL14   | -10.327  |         |        |        | FALSE |
| hsa-miR-210     | SDPR    | -10.3111 |         |        |        | FALSE |
| hsa-miR-141*    | PCOLCE  | -10.3097 |         |        |        | FALSE |
| hsa-miR-425*    | MSRB3   | -10.3051 |         |        |        | FALSE |
| hsa-miR-141*    | LHFP    | -10.297  |         |        |        | FALSE |
| hsa-miR-194*    | MMP2    | -10.2956 |         |        |        | FALSE |
| hsa-miR-130a    | FAM120A | -10.2772 |         |        |        | FALSE |
| hsa-miR-532-5p  | ITGA3   | -10.2755 |         |        |        | FALSE |
| hsa-miR-301b    | CARD6   | -10.2703 |         |        |        | FALSE |
| hsa-miR-200a    | FBN1    | -10.268  |         |        |        | FALSE |
| hsa-miR-92a     | 2-Mar   | -10.2391 |         |        |        | FALSE |
| hsa-miR-30c     | COL5A2  | -10.2371 | -0.3033 | -0.233 |        | FALSE |
| hsa-miR-200a*   | ZCCHC24 | -10.2275 |         |        |        | FALSE |
| hsa-miR-200c*   | GLT8D2  | -10.2252 |         |        |        | FALSE |
| hsa-miR-18a     | PBXIP1  | -10.1946 |         |        |        | FALSE |
| hsa-miR-200b*   | FAP     | -10.1764 |         |        |        | FALSE |
| hsa-miR-200a    | RECK    | -10.1296 |         |        |        | FALSE |
| hsa-miR-200a    | ZCCHC24 | -10.1159 | -0.3375 | -0.514 | 0.7776 | FALSE |
| hsa-miR-3614-5p | CMTM4   | -10.1108 |         |        |        | FALSE |
| hsa-miR-200b*   | ZEB1    | -10.1093 |         |        |        | FALSE |
| hsa-miR-17      | IL1R1   | -10.0946 |         | -0.118 |        | FALSE |
| hsa-miR-18a     | LRP10   | -10.0885 |         |        |        | FALSE |
| hsa-miR-200a*   | CNRIP1  | -10.0753 |         |        |        | FALSE |
| hsa-miR-200b*   | ZCCHC24 | -10.0604 |         |        |        | FALSE |
| hsa-miR-141     | LHFP    | -10.0566 | -2.3479 | -0.663 | 0.3113 | FALSE |

|                |         |          |         |         |        |       |
|----------------|---------|----------|---------|---------|--------|-------|
| hsa-miR-7-1*   | DACT3   | -10.0562 |         |         |        | FALSE |
| hsa-miR-200a*  | RECK    | -10.0525 |         |         |        | FALSE |
| hsa-miR-200b*  | SYDE1   | -10.0409 |         |         |        | FALSE |
| hsa-miR-23a    | STRADB  | -10.0093 |         |         |        | FALSE |
| hsa-miR-200c*  | LHFP    | -10.0053 |         |         |        | FALSE |
| hsa-miR-200c   | MSRB3   | -9.99191 |         |         |        | FALSE |
| hsa-miR-200a   | FERMT2  | -9.98788 |         |         |        | FALSE |
| hsa-miR-1307   | TNFSF12 | -9.98233 |         |         |        | FALSE |
| hsa-miR-200a*  | SYDE1   | -9.97645 |         |         |        | FALSE |
| hsa-miR-200a   | COL5A2  | -9.97331 | -0.1598 |         |        | FALSE |
| hsa-miR-590-5p | CACNA1C | -9.96387 |         | -0.0848 | 0.0574 | FALSE |
| hsa-miR-429    | C1R     | -9.96245 |         |         |        | FALSE |
| hsa-miR-106b*  | TMBIM4  | -9.95895 |         |         |        | FALSE |
| hsa-miR-30d*   | SEC23A  | -9.95664 |         |         |        | FALSE |
| hsa-miR-141*   | MSRB3   | -9.93889 |         |         |        | FALSE |
| hsa-miR-200c*  | JAM3    | -9.9352  |         |         |        | FALSE |
| hsa-miR-7-1*   | CNN1    | -9.93296 |         |         |        | FALSE |
| hsa-miR-96     | DAB2    | -9.92979 | -0.872  | -0.362  |        | FALSE |
| hsa-miR-181c   | RRM2    | -9.92789 |         |         |        | FALSE |
| hsa-miR-1307   | MGP     | -9.91983 |         |         |        | FALSE |
| hsa-miR-200c*  | BGN     | -9.91807 |         |         |        | FALSE |
| hsa-miR-1266   | SNAI2   | -9.81471 |         |         |        | FALSE |
| hsa-miR-141*   | BGN     | -9.81307 |         |         |        | FALSE |
| hsa-miR-92a    | CTSA    | -9.80873 |         |         |        | FALSE |
| hsa-miR-130b   | CBX7    | -9.79591 |         |         |        | FALSE |
| hsa-miR-30e*   | FAP     | -9.79587 |         |         |        | FALSE |
| hsa-miR-409-3p | TMEM80  | -9.78744 |         |         |        | FALSE |
| hsa-miR-194    | MMP2    | -9.78256 |         |         |        | FALSE |
| hsa-miR-200c   | BNC2    | -9.77942 |         | -0.542  | 0.9253 | FALSE |
| hsa-miR-183    | GIMAP1  | -9.77016 |         |         |        | FALSE |
| hsa-miR-19b    | IL1R1   | -9.76172 | -0.4659 | -0.188  | 0.4366 | FALSE |
| hsa-miR-194*   | HTRA1   | -9.76038 |         |         |        | FALSE |
| hsa-miR-22     | GKAP1   | -9.75559 |         |         |        | FALSE |
| hsa-miR-200b   | AXL     | -9.74885 |         |         |        | FALSE |
| hsa-miR-148b   | COL6A3  | -9.74426 | -0.7654 | -0.272  | 0.2389 | FALSE |
| hsa-miR-200a*  | MSRB3   | -9.73898 |         |         |        | FALSE |
| hsa-miR-200c   | EMP3    | -9.73543 |         |         |        | FALSE |
| hsa-miR-30b*   | FAP     | -9.73107 |         |         |        | FALSE |
| hsa-miR-200a   | CFL2    | -9.71934 | -0.6882 | -0.226  | 0.1812 | FALSE |
| hsa-miR-18a    | CYBRD1  | -9.71698 |         |         |        | FALSE |
| hsa-miR-200b   | GFPT2   | -9.70496 |         |         |        | FALSE |
| hsa-miR-148b   | PTRF    | -9.70303 |         |         |        | FALSE |
| hsa-miR-15a    | SPON1   | -9.69469 |         |         |        | FALSE |
| hsa-miR-192    | COL5A1  | -9.69266 |         | -0.068  | 0.2638 | FALSE |
| hsa-miR-429    | QKI     | -9.6925  | -2.9857 | -0.426  | 0.2196 | FALSE |

|                 |          |          |         |        |        |  |       |
|-----------------|----------|----------|---------|--------|--------|--|-------|
| hsa-miR-200a*   | CRTAP    | -9.68805 |         |        |        |  | FALSE |
| hsa-miR-200a    | SEC23A   | -9.67529 | -1.0349 | -0.433 |        |  | FALSE |
| hsa-miR-30d     | ARSI     | -9.67197 |         |        |        |  | FALSE |
| hsa-miR-30d*    | GLT8D2   | -9.67008 |         |        |        |  | FALSE |
| hsa-miR-200b    | GLT8D2   | -9.66597 |         |        |        |  | FALSE |
| hsa-miR-22      | ING5     | -9.6526  |         | -0.104 |        |  | FALSE |
| hsa-miR-200a    | GFPT2    | -9.64234 |         |        |        |  | FALSE |
| hsa-miR-194*    | CNN1     | -9.63601 |         |        |        |  | FALSE |
| hsa-miR-200a    | GLT8D2   | -9.62976 |         |        |        |  | FALSE |
| hsa-miR-30d*    | COL5A1   | -9.62758 |         |        |        |  | FALSE |
| hsa-miR-20a     | IL1R1    | -9.62643 |         | -0.118 |        |  | FALSE |
| hsa-miR-210     | PTPRB    | -9.6231  |         |        |        |  | FALSE |
| hsa-miR-130b    | C3       | -9.62123 |         |        |        |  | FALSE |
| hsa-miR-200b*   | AXL      | -9.61978 |         |        |        |  | FALSE |
| hsa-miR-200c*   | RECK     | -9.60626 |         |        |        |  | FALSE |
| hsa-miR-101     | RRM2     | -9.59698 |         |        |        |  | FALSE |
| hsa-miR-200b    | MSRB3    | -9.58548 |         |        |        |  | FALSE |
| hsa-miR-130b    | MVP      | -9.5799  |         |        |        |  | FALSE |
| hsa-miR-16-2*   | OGN      | -9.56758 |         |        |        |  | FALSE |
| hsa-miR-15b     | SPON1    | -9.56295 |         |        |        |  | FALSE |
| hsa-miR-16-2*   | SPARCL1  | -9.54842 |         |        |        |  | FALSE |
| hsa-miR-125a-5p | KIAA0101 | -9.53931 |         |        |        |  | FALSE |
| hsa-miR-21*     | NRIP2    | -9.53716 |         |        |        |  | FALSE |
| hsa-miR-16-2*   | LDB2     | -9.52419 |         |        |        |  | FALSE |
| hsa-miR-379     | NFATC2IP | -9.51504 |         |        |        |  | FALSE |
| hsa-miR-181a-2* | SOD2     | -9.50703 |         |        |        |  | FALSE |
| hsa-miR-200c    | PMP22    | -9.50024 | -1.1518 | -0.273 |        |  | FALSE |
| hsa-miR-148b    | COL1A2   | -9.49683 |         |        |        |  | FALSE |
| hsa-miR-151-5p  | LYPD3    | -9.49652 |         |        |        |  | FALSE |
| hsa-miR-194     | EHD2     | -9.491   |         |        |        |  | FALSE |
| hsa-miR-429     | AXL      | -9.48958 |         |        |        |  | FALSE |
| hsa-miR-17      | PBXIP1   | -9.48321 |         | -0.201 |        |  | FALSE |
| hsa-miR-194     | TNC      | -9.48114 |         |        |        |  | FALSE |
| hsa-miR-29c     | FAM64A   | -9.48085 |         |        |        |  | FALSE |
| hsa-miR-16-2*   | MRVI1    | -9.48012 |         |        |        |  | FALSE |
| hsa-miR-200c*   | DACT3    | -9.47702 |         |        |        |  | FALSE |
| hsa-miR-502-3p  | CTHRC1   | -9.47083 |         |        |        |  | FALSE |
| hsa-miR-429     | FERMT2   | -9.46949 | -0.7094 | -0.239 | 0.1485 |  | FALSE |
| hsa-miR-200b    | CFL2     | -9.46648 | -1.3939 | -0.708 | 0.2067 |  | FALSE |
| hsa-miR-30e*    | ITGA5    | -9.46368 |         |        |        |  | FALSE |
| hsa-miR-15b*    | ECM2     | -9.45742 |         |        |        |  | FALSE |
| hsa-miR-200c    | PCOLCE   | -9.45075 |         |        |        |  | FALSE |
| hsa-miR-16-2*   | LMOD1    | -9.44654 |         |        |        |  | FALSE |
| hsa-miR-200b    | PTRF     | -9.44453 |         |        |        |  | FALSE |
| hsa-miR-200b*   | CFL2     | -9.44327 |         |        |        |  | FALSE |



|               |           |          |         |        |        |       |
|---------------|-----------|----------|---------|--------|--------|-------|
| hsa-miR-200b* | CALD1     | -9.43568 |         |        |        | FALSE |
| hsa-miR-141*  | CNRIP1    | -9.42884 |         |        |        | FALSE |
| hsa-miR-200a  | AXL       | -9.42808 |         |        |        | FALSE |
| hsa-miR-301a  | AHNAK     | -9.42155 |         |        |        | FALSE |
| hsa-miR-143   | ULK3      | -9.42134 |         | -0.025 | 0.1101 | FALSE |
| hsa-miR-200a  | BNC2      | -9.42107 |         | -0.436 | 0.574  | FALSE |
| hsa-miR-141*  | RECK      | -9.42069 |         |        |        | FALSE |
| hsa-miR-210   | OGN       | -9.41973 |         |        |        | FALSE |
| hsa-miR-186   | CNN1      | -9.40521 |         |        |        | FALSE |
| hsa-miR-7-1*  | LMOD1     | -9.39343 |         |        |        | FALSE |
| hsa-miR-942   | DACT3     | -9.39297 |         |        |        | FALSE |
| hsa-miR-141   | RECK      | -9.38943 |         |        |        | FALSE |
| hsa-miR-106b  | MVP       | -9.38929 |         |        |        | FALSE |
| hsa-miR-22*   | SHPRH     | -9.38431 |         |        |        | FALSE |
| hsa-miR-181c  | TK1       | -9.37828 |         |        |        | FALSE |
| hsa-miR-629*  | MYH11     | -9.35761 |         |        |        | FALSE |
| hsa-miR-101   | ANLN      | -9.35723 |         |        |        | FALSE |
| hsa-miR-183   | GIMAP8    | -9.356   |         |        |        | FALSE |
| hsa-miR-25    | MVP       | -9.35143 |         |        |        | FALSE |
| hsa-miR-101   | KPNA2     | -9.34148 | -0.1337 | -0.251 |        | FALSE |
| hsa-miR-141*  | GLT8D2    | -9.33627 |         |        |        | FALSE |
| hsa-miR-32    | COL3A1    | -9.33491 |         |        |        | FALSE |
| hsa-miR-30d*  | COL3A1    | -9.33375 |         |        |        | FALSE |
| hsa-miR-192*  | TNC       | -9.33283 |         |        |        | FALSE |
| hsa-miR-96    | SYNE1     | -9.33275 |         |        |        | FALSE |
| hsa-miR-32    | CALD1     | -9.32297 | -0.195  | -0.208 |        | FALSE |
| hsa-miR-15b*  | OGN       | -9.32029 |         |        |        | FALSE |
| hsa-miR-301b  | MVP       | -9.31655 |         |        |        | FALSE |
| hsa-miR-200b  | GLIPR1    | -9.31126 |         |        |        | FALSE |
| hsa-miR-429   | MSRB3     | -9.3078  |         |        |        | FALSE |
| hsa-miR-7-1*  | BGN       | -9.30734 |         |        |        | FALSE |
| hsa-miR-92a   | ST6GALNAC | -9.30178 |         |        |        | FALSE |
| hsa-miR-223   | ZNF821    | -9.29696 |         |        |        | FALSE |
| hsa-miR-192   | EHD2      | -9.29293 |         |        |        | FALSE |
| hsa-miR-429   | FAP       | -9.28872 |         |        |        | FALSE |
| hsa-miR-18a   | TXNIP     | -9.28364 |         | -0.037 | 0.1175 | FALSE |
| hsa-miR-15b*  | SPARCL1   | -9.28328 |         |        |        | FALSE |
| hsa-miR-16-2* | PODN      | -9.28118 |         |        |        | FALSE |
| hsa-miR-21    | ANKRD46   | -9.2721  | -0.8446 | -0.408 | 0.1115 | FALSE |
| hsa-miR-200a  | FN1       | -9.26574 |         |        |        | FALSE |
| hsa-miR-223   | USP30     | -9.25917 |         |        |        | FALSE |
| hsa-miR-19a   | SSPN      | -9.25215 |         |        |        | FALSE |
| hsa-miR-194*  | DACT3     | -9.2489  |         |        |        | FALSE |
| hsa-miR-200c  | GNG11     | -9.24428 |         |        |        | FALSE |
| hsa-miR-32    | COL6A3    | -9.24421 | -0.5442 |        |        | FALSE |

|                |          |          |         |         |        |       |
|----------------|----------|----------|---------|---------|--------|-------|
| hsa-miR-194*   | MSRB3    | -9.2425  |         |         |        | FALSE |
| hsa-miR-1307   | PLAC9    | -9.24204 |         |         |        | FALSE |
| hsa-miR-200c   | TGFB111  | -9.24121 |         |         |        | FALSE |
| hsa-miR-30c    | COL6A3   | -9.24007 | -0.5559 |         |        | FALSE |
| hsa-miR-589    | CALCOCO1 | -9.23871 |         |         |        | FALSE |
| hsa-miR-429    | CALD1    | -9.23456 | -0.2497 | -0.111  |        | FALSE |
| hsa-miR-15b    | MXRA8    | -9.23296 |         |         |        | FALSE |
| hsa-miR-429    | NEXN     | -9.23244 |         |         |        | FALSE |
| hsa-miR-769-5p | MVP      | -9.23147 |         |         |        | FALSE |
| hsa-miR-200b   | GAS1     | -9.22772 |         |         |        | FALSE |
| hsa-miR-148b   | COL5A1   | -9.22138 |         |         |        | FALSE |
| hsa-miR-660    | TGFB111  | -9.2109  |         |         |        | FALSE |
| hsa-miR-192    | COL6A3   | -9.20903 |         |         |        | FALSE |
| hsa-miR-200c*  | AEBP1    | -9.20725 |         |         |        | FALSE |
| hsa-miR-194    | MSRB3    | -9.20713 | -0.5321 | -0.233  |        | FALSE |
| hsa-miR-532-5p | PMEPA1   | -9.20595 |         |         |        | FALSE |
| hsa-miR-324-5p | MS4A2    | -9.20515 |         |         |        | FALSE |
| hsa-miR-22*    | KAT6B    | -9.2041  |         |         |        | FALSE |
| hsa-miR-577    | COL6A3   | -9.20388 |         |         |        | FALSE |
| hsa-miR-200a*  | OLFML2B  | -9.19995 |         |         |        | FALSE |
| hsa-miR-200a   | ZFPM2    | -9.19901 | -0.4788 | -0.319  | 0.1743 | FALSE |
| hsa-miR-223*   | ZNF446   | -9.18948 |         |         |        | FALSE |
| hsa-miR-192    | MMP2     | -9.17908 |         |         |        | FALSE |
| hsa-miR-200a*  | PTRF     | -9.17629 |         |         |        | FALSE |
| hsa-miR-192*   | MMP2     | -9.17464 |         |         |        | FALSE |
| hsa-miR-19a    | MVP      | -9.17178 |         |         |        | FALSE |
| hsa-miR-429    | GNG2     | -9.1702  | -0.5931 | -0.167  |        | FALSE |
| hsa-miR-93     | STOM     | -9.16743 | -0.636  | -0.3745 |        | FALSE |
| hsa-miR-96     | NEXN     | -9.16662 |         |         |        | FALSE |
| hsa-miR-200b*  | FBN1     | -9.16628 |         |         |        | FALSE |
| hsa-miR-425*   | ZCCHC24  | -9.16582 |         |         |        | FALSE |
| hsa-miR-429    | FBN1     | -9.15934 |         |         |        | FALSE |
| hsa-miR-96     | GIMAP8   | -9.14949 |         | -0.135  |        | FALSE |
| hsa-miR-27a    | HDHD2    | -9.13602 | -2.9933 | -0.934  |        | FALSE |
| hsa-miR-32     | ASPN     | -9.13436 |         |         |        | FALSE |
| hsa-miR-200b*  | TIMP2    | -9.1283  |         |         |        | FALSE |
| hsa-let-7a     | RPS6KB2  | -9.12678 |         |         |        | FALSE |
| hsa-miR-194    | COL6A3   | -9.12639 |         |         |        | FALSE |
| hsa-miR-130a   | TMEM144  | -9.12425 |         |         |        | FALSE |
| hsa-miR-200a*  | TIMP3    | -9.12036 |         |         |        | FALSE |
| hsa-miR-30a    | RRM2     | -9.1183  | -0.88   | -0.303  |        | FALSE |
| hsa-miR-200a*  | FAP      | -9.11648 |         |         |        | FALSE |
| hsa-miR-101    | SHCBP1   | -9.11002 |         |         |        | FALSE |
| hsa-miR-141*   | COL6A2   | -9.09784 |         |         |        | FALSE |
| hsa-miR-30a    | TICRR    | -9.0959  |         |         |        | FALSE |

|                |           |          |         |        |        |       |
|----------------|-----------|----------|---------|--------|--------|-------|
| hsa-miR-141*   | ZEB1      | -9.09044 |         |        |        | FALSE |
| hsa-miR-19b-1* | LMOD1     | -9.07358 |         |        |        | FALSE |
| hsa-miR-200b*  | GLT8D2    | -9.06908 |         |        |        | FALSE |
| hsa-miR-29c    | DIAPH3    | -9.06795 |         |        |        | FALSE |
| hsa-miR-29c    | MCM10     | -9.06724 |         |        |        | FALSE |
| hsa-miR-150    | YWHAE     | -9.06316 |         |        |        | FALSE |
| hsa-miR-200a*  | ZEB1      | -9.06311 |         |        |        | FALSE |
| hsa-miR-192    | DACT3     | -9.05721 |         |        |        | FALSE |
| hsa-miR-200b*  | COL5A2    | -9.05632 |         |        |        | FALSE |
| hsa-miR-200b   | FERMT2    | -9.05561 | -0.6769 | -0.239 | 0.1485 | FALSE |
| hsa-miR-30d*   | CALD1     | -9.04196 |         |        |        | FALSE |
| hsa-miR-16-2*  | ZCCHC24   | -9.04005 |         |        |        | FALSE |
| hsa-miR-19a    | CBX7      | -9.03139 | -0.2408 | -0.249 | 0.9047 | FALSE |
| hsa-miR-31*    | MYLIP     | -9.02779 |         |        |        | FALSE |
| hsa-miR-200a*  | GLT8D2    | -9.0226  |         |        |        | FALSE |
| hsa-miR-324-5p | CPA3      | -9.02251 |         |        |        | FALSE |
| hsa-miR-214    | ALDH6A1   | -9.02112 |         |        |        | FALSE |
| hsa-miR-429    | GLIPR1    | -9.01718 |         |        |        | FALSE |
| hsa-miR-17     | LMOD1     | -9.01352 |         |        |        | FALSE |
| hsa-miR-200b*  | COL3A1    | -9.01243 |         |        |        | FALSE |
| hsa-miR-17     | ZCCHC24   | -9.00653 |         |        |        | FALSE |
| hsa-miR-200a*  | AXL       | -9.00359 |         |        |        | FALSE |
| hsa-miR-30c    | GREM1     | -8.9943  |         |        |        | FALSE |
| hsa-miR-651    | ZEB1      | -8.98911 |         |        |        | FALSE |
| hsa-miR-200b   | COL5A2    | -8.98429 | -0.1308 | -0.131 |        | FALSE |
| hsa-miR-200a*  | CFL2      | -8.9808  |         |        |        | FALSE |
| hsa-miR-7-1*   | ACTA2     | -8.97752 |         |        |        | FALSE |
| hsa-miR-200b*  | ECM2      | -8.97716 |         |        |        | FALSE |
| hsa-miR-200c*  | GPR124    | -8.97691 |         |        |        | FALSE |
| hsa-miR-942    | MXRA8     | -8.96712 |         |        |        | FALSE |
| hsa-miR-192    | MSRB3     | -8.96153 |         |        |        | FALSE |
| hsa-miR-32     | MMP2      | -8.95963 |         |        |        | FALSE |
| hsa-miR-210    | ZCCHC24   | -8.95926 |         |        |        | FALSE |
| hsa-miR-32     | ECM2      | -8.95732 |         |        |        | FALSE |
| hsa-miR-181c   | PGAM1     | -8.95374 |         | -0.07  |        | FALSE |
| hsa-miR-30a    | AURKB     | -8.95153 |         |        |        | FALSE |
| hsa-miR-16     | IGF2      | -8.93862 |         | -0.02  |        | FALSE |
| hsa-miR-200c*  | COL6A2    | -8.93462 |         |        |        | FALSE |
| hsa-miR-24     | KIAA0319L | -8.93354 |         | -0.096 |        | FALSE |
| hsa-miR-30d*   | AEBP1     | -8.93207 |         |        |        | FALSE |
| hsa-miR-200b   | BNC2      | -8.93172 |         | -0.542 | 0.9253 | FALSE |
| hsa-miR-141    | GPR124    | -8.93157 |         |        |        | FALSE |
| hsa-miR-200a*  | HTRA3     | -8.92931 |         |        |        | FALSE |
| hsa-miR-30a*   | MYBL2     | -8.92438 |         |        |        | FALSE |
| hsa-miR-106b*  | HNMT      | -8.92322 |         |        |        | FALSE |

|                 |         |          |         |        |        |       |
|-----------------|---------|----------|---------|--------|--------|-------|
| hsa-miR-141     | GLT8D2  | -8.92109 |         |        |        | FALSE |
| hsa-miR-30b*    | TNFAIP6 | -8.92092 |         |        |        | FALSE |
| hsa-miR-141*    | FSTL1   | -8.91747 |         |        |        | FALSE |
| hsa-miR-15a     | LMOD1   | -8.9109  | -0.1402 | -0.144 | 0.46   | FALSE |
| hsa-miR-19a     | EFCAB14 | -8.90954 | -0.5833 |        |        | FALSE |
| hsa-miR-96      | GIMAP1  | -8.9046  |         | -0.15  |        | FALSE |
| hsa-miR-19b     | SSPN    | -8.8997  |         |        |        | FALSE |
| hsa-miR-429     | GFPT2   | -8.89629 |         |        |        | FALSE |
| hsa-miR-32      | COL5A1  | -8.89599 | -0.299  | -0.41  | 0.8156 | FALSE |
| hsa-miR-200b*   | COL6A3  | -8.89301 |         |        |        | FALSE |
| hsa-miR-29b-1*  | DACT3   | -8.89277 |         |        |        | FALSE |
| hsa-miR-15b*    | C1QTNF7 | -8.88628 |         |        |        | FALSE |
| hsa-miR-451     | SFRP4   | -8.87842 |         |        |        | FALSE |
| hsa-miR-141     | LIX1L   | -8.87034 |         |        |        | FALSE |
| hsa-miR-16-2*   | C1QTNF7 | -8.86101 |         |        |        | FALSE |
| hsa-miR-194     | COL1A2  | -8.85975 |         |        |        | FALSE |
| hsa-miR-183     | APOL3   | -8.85873 |         |        |        | FALSE |
| hsa-miR-200a*   | FHL3    | -8.85532 |         |        |        | FALSE |
| hsa-miR-17      | SSPN    | -8.8526  |         | -0.164 |        | FALSE |
| hsa-miR-22      | TXNDC16 | -8.85005 |         |        |        | FALSE |
| hsa-miR-16-2*   | PLN     | -8.84462 |         |        |        | FALSE |
| hsa-miR-32      | COL5A2  | -8.83951 |         |        |        | FALSE |
| hsa-miR-194     | COL5A1  | -8.8334  |         |        |        | FALSE |
| hsa-miR-125a-5p | CENPW   | -8.83175 |         |        |        | FALSE |
| hsa-miR-1180    | TNFSF12 | -8.82678 |         |        |        | FALSE |
| hsa-miR-19b     | LMOD1   | -8.82483 |         |        |        | FALSE |
| hsa-miR-30a     | BUB1B   | -8.82328 |         |        |        | FALSE |
| hsa-miR-200a*   | COL5A2  | -8.81805 |         |        |        | FALSE |
| hsa-miR-96      | ZEB2    | -8.81514 |         |        |        | FALSE |
| hsa-miR-195     | HMGA1   | -8.81427 | -0.398  | -0.241 | 0.6046 | FALSE |
| hsa-miR-20a*    | IL1R1   | -8.81035 |         |        |        | FALSE |
| hsa-miR-194*    | FERMT2  | -8.81    |         |        |        | FALSE |
| hsa-miR-429     | AKAP2   | -8.80584 | -0.2875 | -0.051 | 0.7778 | FALSE |
| hsa-miR-200c*   | VIM     | -8.80578 |         |        |        | FALSE |
| hsa-miR-429     | CFL2    | -8.80536 | -1.5644 | -0.708 | 0.2067 | FALSE |
| hsa-miR-141     | JAM3    | -8.80357 |         | -0.117 | 0.109  | FALSE |
| hsa-miR-16-1*   | CNN1    | -8.79984 |         |        |        | FALSE |
| hsa-miR-200b*   | JAM3    | -8.79963 |         |        |        | FALSE |
| hsa-miR-429     | COL5A2  | -8.79862 | -0.1337 | -0.131 |        | FALSE |
| hsa-miR-192*    | FAP     | -8.79656 |         |        |        | FALSE |
| hsa-miR-532-5p  | TGFB111 | -8.79352 |         |        |        | FALSE |
| hsa-miR-30a     | KIF14   | -8.79266 |         |        |        | FALSE |
| hsa-miR-200a    | EMP3    | -8.79177 |         |        |        | FALSE |
| hsa-miR-141*    | AEBP1   | -8.78787 |         |        |        | FALSE |
| hsa-miR-93      | CBX7    | -8.7821  |         | -0.062 |        | FALSE |

|                |         |          |         |        |       |       |
|----------------|---------|----------|---------|--------|-------|-------|
| hsa-miR-200b*  | GPR124  | -8.77605 |         |        |       | FALSE |
| hsa-miR-30b*   | CTHRC1  | -8.77047 |         |        |       | FALSE |
| hsa-miR-942    | LMOD1   | -8.76827 |         |        |       | FALSE |
| hsa-miR-194    | COL6A2  | -8.76755 |         |        |       | FALSE |
| hsa-miR-210    | PLAC9   | -8.76701 |         |        |       | FALSE |
| hsa-miR-19b    | MVP     | -8.76408 |         |        |       | FALSE |
| hsa-let-7g*    | MS4A2   | -8.76396 |         |        |       | FALSE |
| hsa-miR-32     | FBN1    | -8.75618 | -1.7165 | -0.611 | 0.133 | FALSE |
| hsa-miR-101    | DIAPH3  | -8.75052 |         |        |       | FALSE |
| hsa-miR-22*    | RAPGEF6 | -8.7452  |         |        |       | FALSE |
| hsa-miR-652    | ASPN    | -8.7422  |         |        |       | FALSE |
| hsa-miR-200c   | DACT3   | -8.74134 | -0.2695 |        |       | FALSE |
| hsa-miR-652    | CTHRC1  | -8.73707 |         |        |       | FALSE |
| hsa-miR-192    | COL6A2  | -8.73664 |         |        |       | FALSE |
| hsa-miR-7-1*   | TIMP3   | -8.73649 |         |        |       | FALSE |
| hsa-miR-29c    | BUB1B   | -8.72515 |         |        |       | FALSE |
| hsa-miR-200a*  | PCOLCE  | -8.72127 |         |        |       | FALSE |
| hsa-miR-181c*  | APOL2   | -8.71543 |         |        |       | FALSE |
| hsa-miR-30d*   | TNFAIP6 | -8.71503 |         |        |       | FALSE |
| hsa-miR-101    | DLGAP5  | -8.70969 | -0.7975 | -0.195 |       | FALSE |
| hsa-miR-200a   | LIX1L   | -8.70856 |         |        |       | FALSE |
| hsa-miR-425*   | ZEB1    | -8.70616 |         |        |       | FALSE |
| hsa-miR-200b   | CALD1   | -8.7006  | -0.2582 | -0.111 |       | FALSE |
| hsa-miR-651    | MSRB3   | -8.69985 |         |        |       | FALSE |
| hsa-miR-106b*  | TMEM59  | -8.69932 |         |        |       | FALSE |
| hsa-miR-215    | FRMD6   | -8.69767 |         |        |       | FALSE |
| hsa-miR-425*   | CYS1    | -8.69603 |         |        |       | FALSE |
| hsa-miR-181d   | PCYT1A  | -8.69139 |         |        |       | FALSE |
| hsa-miR-130b   | PLD4    | -8.69126 |         |        |       | FALSE |
| hsa-miR-1307   | CNRIP1  | -8.69122 |         |        |       | FALSE |
| hsa-miR-29c    | MEX3A   | -8.69103 |         |        |       | FALSE |
| hsa-miR-423-3p | LMOD1   | -8.69074 |         |        |       | FALSE |
| hsa-miR-210    | NRIP2   | -8.69048 |         |        |       | FALSE |
| hsa-miR-30b*   | MFAP5   | -8.69    |         |        |       | FALSE |
| hsa-miR-142-5p | RABGAP1 | -8.68852 |         |        |       | FALSE |
| hsa-let-7d*    | NNMT    | -8.68831 |         |        |       | FALSE |
| hsa-miR-1307   | PLN     | -8.68732 |         |        |       | FALSE |
| hsa-miR-32     | COL10A1 | -8.68647 |         |        |       | FALSE |
| hsa-miR-16-2*  | FAM198B | -8.68543 |         |        |       | FALSE |
| hsa-miR-141*   | DACT3   | -8.68284 |         |        |       | FALSE |
| hsa-miR-22*    | ARID2   | -8.67977 |         |        |       | FALSE |
| hsa-miR-101    | LDHA    | -8.67542 |         |        |       | FALSE |
| hsa-miR-192    | COL1A2  | -8.66812 |         |        |       | FALSE |
| hsa-miR-192    | AEBP1   | -8.66708 |         |        |       | FALSE |
| hsa-miR-20a    | LMOD1   | -8.66638 |         |        |       | FALSE |

|                 |          |          |         |         |        |       |
|-----------------|----------|----------|---------|---------|--------|-------|
| hsa-miR-194*    | PCOLCE   | -8.66225 |         |         |        | FALSE |
| hsa-miR-3677-3p | KLHDC1   | -8.66026 |         |         |        | FALSE |
| hsa-miR-125a-5p | EXO1     | -8.65483 |         |         |        | FALSE |
| hsa-miR-32      | COL1A2   | -8.64855 | -1.2498 | -0.423  |        | FALSE |
| hsa-miR-30d*    | ASPN     | -8.64614 |         |         |        | FALSE |
| hsa-miR-483-3p  | SQRDL    | -8.64309 |         |         |        | FALSE |
| hsa-miR-29c*    | SERPINH1 | -8.63223 |         |         |        | FALSE |
| hsa-miR-141*    | MXRA8    | -8.63173 |         |         |        | FALSE |
| hsa-miR-93*     | NEXN     | -8.63126 |         |         |        | FALSE |
| hsa-miR-141     | TGFB1I1  | -8.63001 |         |         |        | FALSE |
| hsa-miR-210     | SELP     | -8.62742 |         |         |        | FALSE |
| hsa-miR-18b     | CYBRD1   | -8.62578 |         |         |        | FALSE |
| hsa-miR-30d*    | GREM1    | -8.62195 |         |         |        | FALSE |
| hsa-miR-223     | ZNF19    | -8.6206  |         |         |        | FALSE |
| hsa-miR-26a     | PGAM1    | -8.62013 |         |         |        | FALSE |
| hsa-miR-200b*   | PTRF     | -8.61998 |         |         |        | FALSE |
| hsa-miR-96      | TLN1     | -8.6183  |         |         |        | FALSE |
| hsa-miR-497     | HMGA1    | -8.61589 | -0.468  | -0.241  | 0.6046 | FALSE |
| hsa-miR-30b*    | ASPN     | -8.61322 |         |         |        | FALSE |
| hsa-miR-93      | TNFSF12  | -8.61212 | -0.5256 |         |        | FALSE |
| hsa-miR-92a     | IL1R1    | -8.61174 | -0.1323 | -0.206  |        | FALSE |
| hsa-miR-937     | RAI2     | -8.60896 |         |         |        | FALSE |
| hsa-miR-200a    | COL6A3   | -8.60836 |         |         |        | FALSE |
| hsa-miR-1307    | IGFBP7   | -8.60304 |         |         |        | FALSE |
| hsa-miR-200b    | C1S      | -8.60028 |         |         |        | FALSE |
| hsa-miR-29c     | KIF23    | -8.59716 | -0.1483 |         |        | FALSE |
| hsa-miR-32      | PRKG1    | -8.59432 | -0.8653 |         |        | FALSE |
| hsa-miR-18a     | SNED1    | -8.5913  |         |         |        | FALSE |
| hsa-miR-22*     | ZNF791   | -8.59082 |         |         |        | FALSE |
| hsa-miR-30c     | ADAM12   | -8.58837 | -0.3142 | -0.334  | 0.4469 | FALSE |
| hsa-miR-141     | AXL      | -8.58735 |         |         |        | FALSE |
| hsa-miR-30d*    | COL6A3   | -8.58411 |         |         |        | FALSE |
| hsa-miR-30a*    | DNMT3B   | -8.58385 |         |         |        | FALSE |
| hsa-miR-15b*    | MRVI1    | -8.58321 |         |         |        | FALSE |
| hsa-miR-30a     | ASPM     | -8.58254 |         |         |        | FALSE |
| hsa-miR-200a    | POSTN    | -8.58149 |         |         |        | FALSE |
| hsa-miR-29c     | CCNA2    | -8.5807  | -1.1134 |         |        | FALSE |
| hsa-miR-7-1*    | QKI      | -8.57808 |         |         |        | FALSE |
| hsa-miR-141     | DACT3    | -8.57531 | -0.113  |         |        | FALSE |
| hsa-miR-106b    | CYBRD1   | -8.5749  | -1.8112 | -0.993  | 0.1173 | FALSE |
| hsa-miR-2355-3p | NRIP2    | -8.5703  |         |         |        | FALSE |
| hsa-miR-192*    | COL6A3   | -8.57027 |         |         |        | FALSE |
| hsa-miR-17      | HPGDS    | -8.56935 |         |         |        | FALSE |
| hsa-miR-3677-3p | CALCOCO1 | -8.56338 |         |         |        | FALSE |
| hsa-miR-30a     | KIF11    | -8.55465 | -1.2206 | -0.4712 | 0.0764 | FALSE |

|                 |          |          |         |        |        |  |       |
|-----------------|----------|----------|---------|--------|--------|--|-------|
| hsa-miR-101     | KIF14    | -8.55373 | -0.1029 |        |        |  | FALSE |
| hsa-miR-194*    | ASPN     | -8.55114 |         |        |        |  | FALSE |
| hsa-miR-16-1*   | LMOD1    | -8.55079 |         |        |        |  | FALSE |
| hsa-miR-15b*    | LDB2     | -8.54985 |         |        |        |  | FALSE |
| hsa-miR-194*    | AEBP1    | -8.54595 |         |        |        |  | FALSE |
| hsa-miR-22      | PTBP2    | -8.54522 |         |        |        |  | FALSE |
| hsa-miR-22      | PATZ1    | -8.54233 | -0.2714 |        |        |  | FALSE |
| hsa-miR-106b*   | YPEL5    | -8.54156 |         |        |        |  | FALSE |
| hsa-miR-106a    | CAST     | -8.54085 |         |        |        |  | FALSE |
| hsa-miR-423-3p  | ZCCHC24  | -8.53474 |         |        |        |  | FALSE |
| hsa-miR-30c     | COL3A1   | -8.53325 |         |        |        |  | FALSE |
| hsa-miR-18a     | FBXL5    | -8.53224 |         |        |        |  | FALSE |
| hsa-miR-3127-5p | OMD      | -8.53112 |         |        |        |  | FALSE |
| hsa-miR-192*    | MSRB3    | -8.52825 |         |        |        |  | FALSE |
| hsa-miR-101     | P4HA2    | -8.52429 |         |        |        |  | FALSE |
| hsa-miR-18b     | ZBTB4    | -8.52195 | -1.1649 | -0.243 | 0.4421 |  | FALSE |
| hsa-miR-223*    | ZNF821   | -8.51865 |         |        |        |  | FALSE |
| hsa-miR-30d*    | VCAN     | -8.51754 |         |        |        |  | FALSE |
| hsa-miR-194     | SNAI2    | -8.51196 |         |        |        |  | FALSE |
| hsa-miR-16      | SGCD     | -8.5052  |         | -0.054 | 0.7379 |  | FALSE |
| hsa-miR-141     | TIE1     | -8.50506 |         |        |        |  | FALSE |
| hsa-miR-193b*   | NR3C2    | -8.50346 |         |        |        |  | FALSE |
| hsa-miR-411     | ULK3     | -8.50253 |         |        |        |  | FALSE |
| hsa-miR-502-3p  | ASPN     | -8.49694 |         |        |        |  | FALSE |
| hsa-miR-19a     | PBXIP1   | -8.49601 |         |        |        |  | FALSE |
| hsa-miR-107     | ASPN     | -8.49521 |         |        |        |  | FALSE |
| hsa-miR-15b     | LMOD1    | -8.49433 | -0.1402 | -0.144 | 0.46   |  | FALSE |
| hsa-miR-379     | CDK5RAP3 | -8.48746 |         |        |        |  | FALSE |
| hsa-miR-532-5p  | ASPN     | -8.48614 |         |        |        |  | FALSE |
| hsa-miR-183     | GBP2     | -8.48076 | -0.1459 |        |        |  | FALSE |
| hsa-miR-200b*   | NRP1     | -8.48041 |         |        |        |  | FALSE |
| hsa-miR-576-5p  | SNED1    | -8.47791 |         |        |        |  | FALSE |
| hsa-miR-200c*   | MXRA8    | -8.47769 |         |        |        |  | FALSE |
| hsa-miR-200a*   | MYL9     | -8.47752 |         |        |        |  | FALSE |
| hsa-miR-9*      | MYOF     | -8.4766  |         |        |        |  | FALSE |
| hsa-miR-93*     | SERPING1 | -8.47595 |         |        |        |  | FALSE |
| hsa-miR-629*    | ZBTB4    | -8.47271 |         |        |        |  | FALSE |
| hsa-miR-651     | NEXN     | -8.47128 |         |        |        |  | FALSE |
| hsa-miR-92a     | CD63     | -8.46918 |         |        |        |  | FALSE |
| hsa-miR-183     | PLSCR4   | -8.46846 | -0.8426 | -0.273 |        |  | FALSE |
| hsa-miR-92a     | ITM2B    | -8.4674  | -1.6028 | -0.246 | 0.3648 |  | FALSE |
| hsa-miR-3677-3p | ZBTB4    | -8.46085 |         |        |        |  | FALSE |
| hsa-miR-15b     | HEPH     | -8.46038 |         |        |        |  | FALSE |
| hsa-miR-194     | SGCD     | -8.45711 |         |        | 0.0279 |  | FALSE |
| hsa-miR-141     | MMP2     | -8.45104 |         |        |        |  | FALSE |

|                 |           |          |         |        |        |       |
|-----------------|-----------|----------|---------|--------|--------|-------|
| hsa-miR-125a-5p | CEP55     | -8.45053 |         |        |        | FALSE |
| hsa-miR-192     | NXN       | -8.44872 |         |        |        | FALSE |
| hsa-miR-20a*    | MRVI1     | -8.44657 |         |        |        | FALSE |
| hsa-miR-18a     | RNASEL    | -8.44607 | -0.5114 | -0.301 | 0.0468 | FALSE |
| hsa-miR-326     | RPS9      | -8.44379 |         |        |        | FALSE |
| hsa-miR-651     | ECM2      | -8.44344 |         |        |        | FALSE |
| hsa-miR-18a*    | OGN       | -8.44136 |         |        |        | FALSE |
| hsa-miR-200b*   | ZEB2      | -8.43203 |         |        |        | FALSE |
| hsa-miR-769-5p  | VDR       | -8.43031 |         |        |        | FALSE |
| hsa-miR-1307    | HNMT      | -8.42804 |         |        |        | FALSE |
| hsa-miR-20a     | ZCCHC24   | -8.42526 |         |        |        | FALSE |
| hsa-miR-29b     | C14orf37  | -8.42018 |         |        |        | FALSE |
| hsa-miR-223     | C14orf93  | -8.41694 |         |        |        | FALSE |
| hsa-miR-29b-2*  | SERPINH1  | -8.41454 |         |        |        | FALSE |
| hsa-miR-339-3p  | NBL1      | -8.4137  |         |        |        | FALSE |
| hsa-miR-191*    | PRELP     | -8.41325 |         |        |        | FALSE |
| hsa-miR-16-2*   | SFRP4     | -8.41105 |         |        |        | FALSE |
| hsa-miR-22*     | ZNF397    | -8.40956 |         |        |        | FALSE |
| hsa-miR-3615    | CNN1      | -8.40919 |         |        |        | FALSE |
| hsa-miR-30d*    | FN1       | -8.4083  |         |        |        | FALSE |
| hsa-miR-200b*   | ZFPM2     | -8.40732 |         |        |        | FALSE |
| hsa-miR-200c    | VIM       | -8.40698 |         |        |        | FALSE |
| hsa-miR-194     | FAP       | -8.40526 | -0.156  |        |        | FALSE |
| hsa-miR-181c    | LDHA      | -8.40322 |         |        |        | FALSE |
| hsa-miR-381     | ULK3      | -8.40186 |         |        |        | FALSE |
| hsa-miR-199b-5p | CDT1      | -8.4016  |         |        |        | FALSE |
| hsa-miR-215     | PTK7      | -8.40159 |         |        |        | FALSE |
| hsa-miR-19b-1*  | DACT3     | -8.39472 |         |        |        | FALSE |
| hsa-miR-429     | PTRF      | -8.39421 |         |        |        | FALSE |
| hsa-miR-194*    | IGFBP7    | -8.39119 |         |        |        | FALSE |
| hsa-miR-16-2*   | DCN       | -8.39111 |         |        |        | FALSE |
| hsa-miR-2355-3p | GPRASP1   | -8.3906  |         |        |        | FALSE |
| hsa-miR-191     | MSRB3     | -8.39039 |         |        |        | FALSE |
| hsa-miR-200a*   | OSTM1     | -8.38158 |         |        |        | FALSE |
| hsa-miR-589*    | CACNA1C   | -8.38097 |         |        |        | FALSE |
| hsa-miR-369-5p  | UVSSA     | -8.37896 |         |        |        | FALSE |
| hsa-miR-17*     | ST6GALNAC | -8.37857 |         |        |        | FALSE |
| hsa-miR-152     | ULK3      | -8.37468 | -0.137  | -0.172 | 0.1545 | FALSE |
| hsa-miR-194*    | SGCD      | -8.37453 |         |        |        | FALSE |
| hsa-miR-200b*   | FAM26E    | -8.37339 |         |        |        | FALSE |
| hsa-miR-200a    | OLFML2B   | -8.37247 |         |        |        | FALSE |
| hsa-miR-483-3p  | CREBL2    | -8.36759 |         |        |        | FALSE |
| hsa-miR-7-1*    | ZCCHC24   | -8.36681 |         |        |        | FALSE |
| hsa-miR-21      | CRY2      | -8.36486 |         |        |        | FALSE |
| hsa-miR-301b    | GAPT      | -8.35992 |         |        |        | FALSE |



|                |         |          |         |        |        |       |
|----------------|---------|----------|---------|--------|--------|-------|
| hsa-miR-200a   | CALD1   | -8.35914 | -0.2173 | -0.057 | 0.1669 | FALSE |
| hsa-miR-627    | CACNA1C | -8.35847 |         |        |        | FALSE |
| hsa-miR-32     | SGCD    | -8.35366 |         | -0.042 |        | FALSE |
| hsa-miR-30d*   | CPXM1   | -8.35292 |         |        |        | FALSE |
| hsa-miR-141    | RHOJ    | -8.35109 |         |        |        | FALSE |
| hsa-miR-200a   | PDE2A   | -8.35098 |         |        |        | FALSE |
| hsa-miR-23a*   | MGP     | -8.3497  |         |        |        | FALSE |
| hsa-miR-210    | SEMA3G  | -8.34886 |         |        |        | FALSE |
| hsa-miR-130b   | CTSO    | -8.34852 |         |        |        | FALSE |
| hsa-miR-15b*   | MYH11   | -8.34834 |         |        |        | FALSE |
| hsa-miR-429    | TLN1    | -8.34746 | -0.1372 | -0.2   | 0.4194 | FALSE |
| hsa-miR-200b*  | C1R     | -8.34371 |         |        |        | FALSE |
| hsa-miR-200a   | GLIPR1  | -8.33393 |         |        |        | FALSE |
| hsa-miR-130b   | LRP10   | -8.33127 |         |        |        | FALSE |
| hsa-miR-15a    | HEYL    | -8.33113 |         |        | 0.0892 | FALSE |
| hsa-miR-17     | MVP     | -8.32979 |         |        |        | FALSE |
| hsa-miR-29c    | MFAP2   | -8.32127 | -0.7571 | -0.122 | 0.6055 | FALSE |
| hsa-miR-17     | CYBRD1  | -8.32113 | -1.8112 | -0.993 | 0.1173 | FALSE |
| hsa-miR-200a*  | CALD1   | -8.32033 |         |        |        | FALSE |
| hsa-miR-423-3p | PLN     | -8.31703 |         |        |        | FALSE |
| hsa-miR-194    | PTRF    | -8.31692 |         |        |        | FALSE |
| hsa-miR-194    | ASPN    | -8.31553 | -0.1569 |        |        | FALSE |
| hsa-miR-30c    | SNAI2   | -8.31275 | -1.1104 |        | 0.3112 | FALSE |
| hsa-miR-744*   | MS4A2   | -8.31189 |         |        |        | FALSE |
| hsa-miR-429    | NRP1    | -8.30968 | -0.1305 |        |        | FALSE |
| hsa-miR-19b    | A2M     | -8.30916 |         |        |        | FALSE |
| hsa-miR-194*   | GLT8D2  | -8.30798 |         |        |        | FALSE |
| hsa-miR-149    | CARD6   | -8.30349 |         |        |        | FALSE |
| hsa-miR-200b   | NEXN    | -8.3028  |         |        |        | FALSE |
| hsa-miR-18a*   | LMOD1   | -8.30173 |         |        |        | FALSE |
| hsa-miR-200b   | FBN1    | -8.29952 | -0.5815 |        |        | FALSE |
| hsa-miR-195    | MAPK6   | -8.29522 |         |        |        | FALSE |
| hsa-miR-497    | IGF2BP2 | -8.29307 |         |        |        | FALSE |
| hsa-miR-107    | PLN     | -8.29254 |         |        |        | FALSE |
| hsa-miR-200a*  | FBN1    | -8.29251 |         |        |        | FALSE |
| hsa-miR-33b    | STON1   | -8.28954 | -0.3296 | -0.562 |        | FALSE |
| hsa-miR-96     | STARD8  | -8.28877 |         |        |        | FALSE |
| hsa-miR-411    | FUK     | -8.28688 |         |        |        | FALSE |
| hsa-miR-101    | KIF23   | -8.28364 |         |        |        | FALSE |
| hsa-miR-200b   | CTHRC1  | -8.28257 |         |        |        | FALSE |
| hsa-miR-16-1*  | MYH11   | -8.28248 |         |        |        | FALSE |
| hsa-miR-150    | P4HA1   | -8.27998 |         |        |        | FALSE |
| hsa-miR-92a-1* | SSC5D   | -8.27827 |         |        |        | FALSE |
| hsa-miR-194*   | PPAPDC3 | -8.27773 |         |        |        | FALSE |
| hsa-miR-942    | ZCCHC24 | -8.27736 |         |        |        | FALSE |

|                 |          |          |        |        |       |
|-----------------|----------|----------|--------|--------|-------|
| hsa-miR-223     | PATZ1    | -8.27447 |        |        | FALSE |
| hsa-miR-92a     | GAPT     | -8.27425 |        |        | FALSE |
| hsa-miR-29c     | SERPINH1 | -8.27288 | -0.113 | 0.9402 | FALSE |
| hsa-miR-128     | PLN      | -8.27246 |        |        | FALSE |
| hsa-miR-183     | SYNE1    | -8.27001 |        |        | FALSE |
| hsa-miR-532-5p  | PDLIM7   | -8.26993 |        |        | FALSE |
| hsa-miR-19a     | A2M      | -8.26728 |        |        | FALSE |
| hsa-miR-7-1*    | ACTG2    | -8.26505 |        |        | FALSE |
| hsa-miR-7-1*    | AEBP1    | -8.26501 |        |        | FALSE |
| hsa-miR-210     | A2M      | -8.26403 |        |        | FALSE |
| hsa-miR-194     | COL12A1  | -8.26245 |        |        | FALSE |
| hsa-miR-200a    | ADAM12   | -8.26152 |        |        | FALSE |
| hsa-miR-141*    | TGFB1I1  | -8.26138 |        |        | FALSE |
| hsa-miR-200c*   | BNC2     | -8.26013 |        |        | FALSE |
| hsa-miR-194     | GAS1     | -8.25789 |        |        | FALSE |
| hsa-miR-200b*   | GFPT2    | -8.25675 |        |        | FALSE |
| hsa-miR-188-5p  | CYBRD1   | -8.25413 |        |        | FALSE |
| hsa-miR-200a*   | COL6A2   | -8.2493  |        |        | FALSE |
| hsa-miR-210     | DARC     | -8.24118 |        |        | FALSE |
| hsa-miR-192     | CNN1     | -8.2395  |        |        | FALSE |
| hsa-miR-15b     | PLN      | -8.23588 |        |        | FALSE |
| hsa-miR-144     | SFRP4    | -8.23369 |        |        | FALSE |
| hsa-miR-93      | SERPING1 | -8.23012 |        |        | FALSE |
| hsa-miR-429     | ATP8B2   | -8.22981 |        |        | FALSE |
| hsa-miR-1307    | CD52     | -8.22898 |        |        | FALSE |
| hsa-miR-1226    | OGN      | -8.22857 |        |        | FALSE |
| hsa-miR-330-5p  | RPL10A   | -8.22775 |        |        | FALSE |
| hsa-miR-96      | MYLK     | -8.2246  |        |        | FALSE |
| hsa-miR-17      | OGN      | -8.21957 |        |        | FALSE |
| hsa-miR-30d*    | COL12A1  | -8.21809 |        |        | FALSE |
| hsa-miR-379     | AMT      | -8.21568 |        |        | FALSE |
| hsa-miR-200c*   | HTRA3    | -8.2141  |        |        | FALSE |
| hsa-miR-96      | GIMAP6   | -8.21361 |        |        | FALSE |
| hsa-miR-629*    | DACT3    | -8.21347 |        |        | FALSE |
| hsa-miR-141     | VIM      | -8.21177 |        |        | FALSE |
| hsa-miR-3127-5p | ASPN     | -8.21048 |        |        | FALSE |
| hsa-miR-16-2*   | MSRB3    | -8.21004 |        |        | FALSE |
| hsa-miR-19a     | LMOD1    | -8.2086  |        |        | FALSE |
| hsa-miR-204     | ERO1L    | -8.20678 |        |        | FALSE |
| hsa-miR-449a    | FN1      | -8.20583 |        |        | FALSE |
| hsa-miR-200b*   | BNC2     | -8.20554 |        |        | FALSE |
| hsa-miR-328     | TMSB10   | -8.20546 |        |        | FALSE |
| hsa-miR-324-5p  | DPYD     | -8.2048  |        |        | FALSE |
| hsa-miR-18a     | ARHGAP1  | -8.2039  |        |        | FALSE |
| hsa-miR-93      | OMD      | -8.20167 |        |        | FALSE |

|                 |           |          |         |        |        |       |
|-----------------|-----------|----------|---------|--------|--------|-------|
| hsa-miR-194*    | BGN       | -8.20026 |         |        |        | FALSE |
| hsa-miR-590-5p  | ZEB1      | -8.19973 | -0.6553 |        |        | FALSE |
| hsa-miR-425*    | PTRF      | -8.19556 |         |        |        | FALSE |
| hsa-miR-210     | TEK       | -8.19456 |         |        |        | FALSE |
| hsa-miR-221     | SNX4      | -8.19297 | -2.368  | -0.88  | 0.2208 | FALSE |
| hsa-miR-16-2*   | CNN1      | -8.19259 |         |        |        | FALSE |
| hsa-miR-200a*   | ECM2      | -8.19086 |         |        |        | FALSE |
| hsa-miR-577     | ZCCHC24   | -8.1908  |         |        |        | FALSE |
| hsa-miR-222*    | ZNF652    | -8.19012 |         |        |        | FALSE |
| hsa-miR-141*    | BNC2      | -8.18701 |         |        |        | FALSE |
| hsa-miR-429     | TGFB11    | -8.18642 |         |        |        | FALSE |
| hsa-miR-421     | ZBTB4     | -8.18323 |         |        |        | FALSE |
| hsa-miR-200b*   | LHFP      | -8.18294 |         |        |        | FALSE |
| hsa-miR-130a    | PAFAH2    | -8.18252 |         |        |        | FALSE |
| hsa-miR-30b*    | GPX8      | -8.18195 |         |        |        | FALSE |
| hsa-miR-30d     | POSTN     | -8.17924 | -0.6098 |        |        | FALSE |
| hsa-miR-429     | LAMA4     | -8.17844 | -0.1288 |        |        | FALSE |
| hsa-miR-21      | RALGAPA1  | -8.178   | -0.5651 | -0.205 |        | FALSE |
| hsa-miR-144*    | SFRP4     | -8.17784 |         |        |        | FALSE |
| hsa-miR-425     | CBX7      | -8.17766 |         |        |        | FALSE |
| hsa-miR-141*    | SLC39A13  | -8.17679 |         |        |        | FALSE |
| hsa-miR-3677-3p | GTF2IRD2B | -8.17588 |         |        |        | FALSE |
| hsa-miR-93      | CYBRD1    | -8.17447 | -1.8304 | -0.993 | 0.1173 | FALSE |
| hsa-miR-15b*    | OMD       | -8.17129 |         |        |        | FALSE |
| hsa-miR-152     | SECISBP2  | -8.17012 |         |        |        | FALSE |
| hsa-miR-200c*   | TIMP3     | -8.16984 |         |        |        | FALSE |
| hsa-miR-30d*    | FSTL1     | -8.169   |         |        |        | FALSE |
| hsa-miR-21      | ZCCHC3    | -8.16744 | -0.8169 | -0.192 | 0.4117 | FALSE |
| hsa-miR-141*    | AXL       | -8.16497 |         |        |        | FALSE |
| hsa-miR-30b     | RECQL     | -8.16399 | -0.382  |        |        | FALSE |
| hsa-miR-125a-5p | CCNB1     | -8.16228 |         |        |        | FALSE |
| hsa-miR-192     | SGCD      | -8.15941 |         | -0.747 | 0.2457 | FALSE |
| hsa-miR-182     | CLEC2B    | -8.1593  |         |        |        | FALSE |
| hsa-miR-20a*    | GAPT      | -8.15792 |         |        |        | FALSE |
| hsa-miR-30e*    | COL5A1    | -8.15591 |         |        |        | FALSE |
| hsa-miR-150*    | YWHAE     | -8.15481 |         |        |        | FALSE |
| hsa-miR-193b    | ITM2A     | -8.14634 |         |        |        | FALSE |
| hsa-miR-183     | FYB       | -8.14199 |         |        |        | FALSE |
| hsa-miR-7-1*    | COL5A1    | -8.14025 |         |        |        | FALSE |
| hsa-miR-33b     | GPR124    | -8.13973 |         |        |        | FALSE |
| hsa-miR-183     | CBX7      | -8.13955 |         |        |        | FALSE |
| hsa-miR-92a     | GMFG      | -8.13944 |         |        |        | FALSE |
| hsa-miR-30a     | GTSE1     | -8.13904 |         |        |        | FALSE |
| hsa-miR-200c*   | KANK2     | -8.13593 |         |        |        | FALSE |
| hsa-miR-200c    | CTHRC1    | -8.13514 |         |        |        | FALSE |

|                |         |          |         |        |        |       |
|----------------|---------|----------|---------|--------|--------|-------|
| hsa-miR-141*   | JAM3    | -8.13514 |         |        |        | FALSE |
| hsa-miR-200a   | GNG2    | -8.13383 |         | -0.229 | 0.109  | FALSE |
| hsa-miR-16-1*  | PLN     | -8.12993 |         |        |        | FALSE |
| hsa-miR-22*    | CREBRF  | -8.12976 |         |        |        | FALSE |
| hsa-miR-425*   | PRELP   | -8.12708 |         |        |        | FALSE |
| hsa-miR-200b   | C1R     | -8.1253  |         |        |        | FALSE |
| hsa-miR-30a    | SPAG5   | -8.12471 |         |        |        | FALSE |
| hsa-miR-148b   | MMP2    | -8.12356 |         |        |        | FALSE |
| hsa-miR-18a*   | FCER1A  | -8.1226  |         |        |        | FALSE |
| hsa-miR-769-5p | IL4R    | -8.11969 |         |        |        | FALSE |
| hsa-miR-21*    | ANKRD46 | -8.11365 |         |        |        | FALSE |
| hsa-miR-30d*   | ADAM12  | -8.11176 |         |        |        | FALSE |
| hsa-miR-30c    | KCND2   | -8.11145 | -0.9599 | -0.141 |        | FALSE |
| hsa-miR-210    | C7      | -8.11025 |         |        |        | FALSE |
| hsa-miR-141    | PDE2A   | -8.10952 |         |        |        | FALSE |
| hsa-miR-200b*  | OSTM1   | -8.10845 |         |        |        | FALSE |
| hsa-miR-141    | GALNTL2 | -8.10514 | -0.2104 |        |        | FALSE |
| hsa-miR-200c   | FAP     | -8.10304 |         |        |        | FALSE |
| hsa-miR-93     | ECM2    | -8.10277 |         |        |        | FALSE |
| hsa-miR-16     | C1QTNF7 | -8.09691 |         |        |        | FALSE |
| hsa-miR-16-2*  | MYH11   | -8.09419 |         |        |        | FALSE |
| hsa-miR-141*   | PMP22   | -8.09418 |         |        |        | FALSE |
| hsa-miR-18b    | AHNAK   | -8.09392 |         |        |        | FALSE |
| hsa-miR-141    | JAM2    | -8.09354 |         |        |        | FALSE |
| hsa-miR-15a    | PODN    | -8.09092 |         |        | 0.0921 | FALSE |
| hsa-miR-200b*  | COL6A2  | -8.0868  |         |        |        | FALSE |
| hsa-miR-429    | FN1     | -8.08523 | -2.0599 | -0.529 | 0.2779 | FALSE |
| hsa-miR-194*   | PODNL1  | -8.08473 |         |        |        | FALSE |
| hsa-miR-192    | NEXN    | -8.08313 |         |        |        | FALSE |
| hsa-miR-200a   | IKBIP   | -8.08279 |         |        |        | FALSE |
| hsa-miR-29b-1* | JAM3    | -8.08164 |         |        |        | FALSE |
| hsa-miR-17*    | 2-Mar   | -8.07743 |         |        |        | FALSE |
| hsa-miR-590-5p | MRVI1   | -8.07599 |         |        |        | FALSE |
| hsa-miR-502-3p | FN1     | -8.07404 |         |        |        | FALSE |
| hsa-miR-19b-1* | GPR124  | -8.0736  |         |        |        | FALSE |
| hsa-miR-30d*   | MMP2    | -8.07225 |         |        |        | FALSE |
| hsa-miR-7-1*   | MMP2    | -8.07213 |         |        |        | FALSE |
| hsa-miR-30a*   | TICRR   | -8.06967 |         |        |        | FALSE |
| hsa-miR-30e*   | COL5A2  | -8.06953 |         |        |        | FALSE |
| hsa-miR-200b   | POSTN   | -8.06847 |         |        |        | FALSE |
| hsa-miR-760    | IGFBP7  | -8.0681  |         |        |        | FALSE |
| hsa-miR-148b   | TGFB1I1 | -8.06809 |         |        |        | FALSE |
| hsa-miR-16-2*  | MMP2    | -8.06774 |         |        |        | FALSE |
| hsa-miR-107    | CNN1    | -8.06741 |         |        |        | FALSE |
| hsa-miR-30b*   | GLT8D2  | -8.06715 |         |        |        | FALSE |

|                 |          |          |         |        |        |       |
|-----------------|----------|----------|---------|--------|--------|-------|
| hsa-miR-590-5p  | AEBP1    | -8.06583 |         |        | FALSE  |       |
| hsa-miR-30e*    | SPHK1    | -8.06535 |         |        | FALSE  |       |
| hsa-miR-200b    | FHL3     | -8.0649  |         |        | FALSE  |       |
| hsa-miR-200a    | NID2     | -8.06282 | -0.1625 |        | FALSE  |       |
| hsa-miR-210     | ARHGEF15 | -8.0621  |         |        | FALSE  |       |
| hsa-miR-192*    | CNN1     | -8.06087 |         |        | FALSE  |       |
| hsa-miR-200a    | COL3A1   | -8.0608  |         |        | FALSE  |       |
| hsa-miR-20a     | SSPN     | -8.06007 |         | -0.164 | FALSE  |       |
| hsa-miR-92a-1*  | MMP2     | -8.05977 |         |        | FALSE  |       |
| hsa-miR-194     | NEXN     | -8.0591  |         |        | FALSE  |       |
| hsa-miR-22*     | TXNDC16  | -8.0575  |         |        | FALSE  |       |
| hsa-miR-183     | GIMAP4   | -8.05749 |         |        | FALSE  |       |
| hsa-miR-502-3p  | COL10A1  | -8.05629 |         |        | FALSE  |       |
| hsa-miR-200c    | JAM3     | -8.05595 |         | -0.085 | FALSE  |       |
| hsa-miR-139-5p  | ENO2     | -8.05555 |         | -0.079 | FALSE  |       |
| hsa-miR-16      | MYH11    | -8.05461 |         |        | FALSE  |       |
| hsa-miR-93*     | AEBP1    | -8.05065 |         |        | FALSE  |       |
| hsa-miR-93      | ZCCHC24  | -8.04745 |         |        | FALSE  |       |
| hsa-miR-500b    | FAP      | -8.04694 |         |        | FALSE  |       |
| hsa-miR-502-3p  | ANTXR1   | -8.04113 |         |        | FALSE  |       |
| hsa-miR-193b    | NR3C2    | -8.04015 |         |        | FALSE  |       |
| hsa-miR-200a    | CTHRC1   | -8.03966 |         |        | FALSE  |       |
| hsa-miR-192     | PTK7     | -8.03818 |         |        | FALSE  |       |
| hsa-miR-629*    | SHROOM4  | -8.03786 |         |        | FALSE  |       |
| hsa-miR-200b*   | POSTN    | -8.03566 |         |        | FALSE  |       |
| hsa-miR-130b*   | CARD6    | -8.0334  |         |        | FALSE  |       |
| hsa-miR-425*    | CNN1     | -8.03141 |         |        | FALSE  |       |
| hsa-miR-215     | SGCD     | -8.03098 |         | -0.747 | 0.2457 | FALSE |
| hsa-miR-181c    | SHCBP1   | -8.03094 |         |        | FALSE  |       |
| hsa-miR-29c     | MSANTD3  | -8.02805 | -0.362  |        | FALSE  |       |
| hsa-let-7b*     | TIMM17B  | -8.0257  |         |        | FALSE  |       |
| hsa-miR-15b     | CACNA1C  | -8.02448 |         |        | FALSE  |       |
| hsa-miR-200a*   | BGN      | -8.024   |         |        | FALSE  |       |
| hsa-miR-141*    | COL3A1   | -8.02352 |         |        | FALSE  |       |
| hsa-miR-194*    | CTHRC1   | -8.02327 |         |        | FALSE  |       |
| hsa-miR-125a-5p | MYBL2    | -8.02303 |         |        | FALSE  |       |
| hsa-miR-21*     | ZNF362   | -8.02301 |         |        | FALSE  |       |
| hsa-miR-3127-5p | IGFBP7   | -8.02277 |         |        | FALSE  |       |
| hsa-miR-194     | COL6A1   | -8.02264 |         |        | FALSE  |       |
| hsa-miR-210     | TAL1     | -8.02248 |         |        | FALSE  |       |
| hsa-miR-194     | PDLIM7   | -8.02105 |         |        | FALSE  |       |
| hsa-miR-3065-5p | NEXN     | -8.02053 |         |        | FALSE  |       |
| hsa-miR-20a     | OMD      | -8.0205  |         |        | FALSE  |       |
| hsa-miR-125a-5p | CCNA2    | -8.01955 |         |        | FALSE  |       |
| hsa-miR-340*    | AHNAK    | -8.01869 |         |        | FALSE  |       |

|                 |          |          |         |        |        |       |
|-----------------|----------|----------|---------|--------|--------|-------|
| hsa-miR-200a*   | P4HA3    | -8.01763 |         |        |        | FALSE |
| hsa-miR-590-5p  | FYCO1    | -8.01737 |         |        |        | FALSE |
| hsa-miR-17*     | PLN      | -8.01648 |         |        |        | FALSE |
| hsa-miR-192*    | SGCD     | -8.016   |         |        |        | FALSE |
| hsa-miR-214*    | NFATC2IP | -8.01596 |         |        |        | FALSE |
| hsa-miR-141*    | PTRF     | -8.01212 |         |        |        | FALSE |
| hsa-miR-210     | PGM5     | -8.01059 |         |        |        | FALSE |
| hsa-miR-145     | MIF      | -8.01054 |         |        |        | FALSE |
| hsa-miR-200c    | MMP2     | -8.00355 |         |        |        | FALSE |
| hsa-miR-141     | GNG2     | -8.00348 |         | -0.229 | 0.109  | FALSE |
| hsa-miR-200b*   | CCDC80   | -8.00274 |         |        |        | FALSE |
| hsa-miR-148b    | HTRA3    | -8.00068 |         | -0.002 | 0.2219 | FALSE |
| hsa-miR-106b*   | TSPAN31  | -8.00024 |         |        |        | FALSE |
| hsa-miR-93*     | ZCCHC24  | -7.99967 |         |        |        | FALSE |
| hsa-miR-942     | CNN1     | -7.99806 |         |        |        | FALSE |
| hsa-miR-423-3p  | PPAPDC3  | -7.99431 |         |        |        | FALSE |
| hsa-miR-30a     | EXO1     | -7.9941  |         |        |        | FALSE |
| hsa-miR-200b    | ADAM12   | -7.99187 | -1.1408 | -0.665 |        | FALSE |
| hsa-miR-15b     | OMD      | -7.99038 |         |        |        | FALSE |
| hsa-miR-194*    | COL6A2   | -7.9901  |         |        |        | FALSE |
| hsa-miR-324-5p  | HNMT     | -7.98968 |         |        |        | FALSE |
| hsa-miR-194*    | ECM2     | -7.98778 |         |        |        | FALSE |
| hsa-miR-7-1*    | MYLK     | -7.98731 |         |        |        | FALSE |
| hsa-miR-30d*    | FBN1     | -7.98708 |         |        |        | FALSE |
| hsa-miR-141*    | LEPRE1   | -7.98693 |         |        |        | FALSE |
| hsa-miR-200a*   | MRC2     | -7.98611 |         |        |        | FALSE |
| hsa-miR-200c*   | SYDE1    | -7.9857  |         |        |        | FALSE |
| hsa-miR-429     | CNRIP1   | -7.98403 |         |        |        | FALSE |
| hsa-miR-148b    | FAP      | -7.984   |         |        |        | FALSE |
| hsa-miR-423-3p  | DCN      | -7.98227 |         |        |        | FALSE |
| hsa-miR-429     | PDE2A    | -7.98157 |         |        |        | FALSE |
| hsa-miR-200b*   | GLIPR1   | -7.97991 |         |        |        | FALSE |
| hsa-miR-200b*   | TIMP3    | -7.97977 |         |        |        | FALSE |
| hsa-miR-192*    | GAS1     | -7.97647 |         |        |        | FALSE |
| hsa-miR-200a    | CCDC80   | -7.97361 | -1.2321 | -0.342 | 0.3871 | FALSE |
| hsa-miR-19b-1*  | CNN1     | -7.97334 |         |        |        | FALSE |
| hsa-miR-3065-5p | KCNMB1   | -7.97331 |         |        |        | FALSE |
| hsa-miR-3200-3p | IL15RA   | -7.97322 |         |        |        | FALSE |
| hsa-miR-93*     | ECM2     | -7.97296 |         |        |        | FALSE |
| hsa-miR-15b     | TIMP3    | -7.97293 |         |        |        | FALSE |
| hsa-miR-93*     | SYNE1    | -7.97285 |         |        |        | FALSE |
| hsa-miR-146b-5p | ARHGAP32 | -7.9723  | -0.1311 |        |        | FALSE |
| hsa-miR-200c*   | COL1A2   | -7.97024 |         |        |        | FALSE |
| hsa-miR-141*    | CD248    | -7.96743 |         |        |        | FALSE |
| hsa-miR-30a     | DNMT3B   | -7.96654 | -0.8007 | -0.243 |        | FALSE |

|                 |           |          |         |         |        |  |       |
|-----------------|-----------|----------|---------|---------|--------|--|-------|
| hsa-miR-15b*    | ZCCHC24   | -7.96547 |         |         |        |  | FALSE |
| hsa-miR-7-1*    | CALD1     | -7.96521 |         |         |        |  | FALSE |
| hsa-miR-30a*    | CCNB2     | -7.96502 |         |         |        |  | FALSE |
| hsa-miR-194*    | PRELP     | -7.9647  |         |         |        |  | FALSE |
| hsa-miR-141     | NEXN      | -7.96435 | -0.6748 | -0.23   | 0.167  |  | FALSE |
| hsa-miR-32      | FAP       | -7.96215 |         |         |        |  | FALSE |
| hsa-miR-200a*   | GFPT2     | -7.9566  |         |         |        |  | FALSE |
| hsa-miR-3200-3p | GBP2      | -7.9564  |         |         |        |  | FALSE |
| hsa-miR-130b    | CX3CR1    | -7.95438 |         |         |        |  | FALSE |
| hsa-miR-200a*   | EMP3      | -7.95384 |         |         |        |  | FALSE |
| hsa-miR-200b*   | PDE2A     | -7.95087 |         |         |        |  | FALSE |
| hsa-miR-200a*   | GAS1      | -7.95062 |         |         |        |  | FALSE |
| hsa-miR-409-3p  | HDHD3     | -7.94961 |         |         |        |  | FALSE |
| hsa-miR-629*    | LMOD1     | -7.9484  |         |         |        |  | FALSE |
| hsa-miR-92a-1*  | CTSA      | -7.94772 |         |         |        |  | FALSE |
| hsa-miR-210     | HSPB6     | -7.94612 |         |         |        |  | FALSE |
| hsa-miR-200a    | FAM26E    | -7.94354 | -0.196  | -0.184  | 0.1675 |  | FALSE |
| hsa-miR-17*     | CNN1      | -7.94206 |         |         |        |  | FALSE |
| hsa-miR-324-3p  | LST1      | -7.94175 |         |         |        |  | FALSE |
| hsa-miR-141*    | OSTM1     | -7.93984 |         |         |        |  | FALSE |
| hsa-miR-15b*    | PLN       | -7.93899 |         |         |        |  | FALSE |
| hsa-miR-100     | ATG4D     | -7.93539 |         |         |        |  | FALSE |
| hsa-miR-194     | COL3A1    | -7.93499 |         |         |        |  | FALSE |
| hsa-miR-629*    | ZCCHC24   | -7.93429 |         |         |        |  | FALSE |
| hsa-miR-200a*   | AEBP1     | -7.93303 |         |         |        |  | FALSE |
| hsa-miR-1976    | DACT3     | -7.93119 |         |         |        |  | FALSE |
| hsa-miR-150     | TNFRSF10D | -7.93095 |         |         |        |  | FALSE |
| hsa-miR-16-2*   | TPSAB1    | -7.92966 |         |         |        |  | FALSE |
| hsa-miR-30b     | FBN1      | -7.92902 |         |         |        |  | FALSE |
| hsa-miR-30d*    | COL6A1    | -7.92892 |         |         |        |  | FALSE |
| hsa-miR-30c     | SULF1     | -7.92826 |         |         |        |  | FALSE |
| hsa-miR-128     | ACTA2     | -7.92765 |         | -0.103  | 0.4101 |  | FALSE |
| hsa-miR-590-5p  | TNS1      | -7.92737 |         | -0.1353 | 0.3714 |  | FALSE |
| hsa-miR-200c    | GALNTL2   | -7.92559 |         |         |        |  | FALSE |
| hsa-miR-106b    | MSRB3     | -7.925   |         | -0.038  |        |  | FALSE |
| hsa-miR-200a    | GAS1      | -7.92474 | -0.264  | -0.08   | 0.1666 |  | FALSE |
| hsa-miR-7-1*    | GLT8D2    | -7.92383 |         |         |        |  | FALSE |
| hsa-miR-363     | AHNAK2    | -7.92372 |         |         |        |  | FALSE |
| hsa-miR-194*    | NXN       | -7.92066 |         |         |        |  | FALSE |
| hsa-miR-31      | MYLIP     | -7.9206  |         |         |        |  | FALSE |
| hsa-miR-183     | HNMT      | -7.91783 |         |         |        |  | FALSE |
| hsa-miR-339-3p  | MSRB3     | -7.91772 |         |         |        |  | FALSE |
| hsa-miR-200c    | LIX1L     | -7.91686 |         |         |        |  | FALSE |
| hsa-miR-1180    | GMFG      | -7.91648 |         |         |        |  | FALSE |
| hsa-miR-200b    | CCDC80    | -7.91118 |         |         |        |  | FALSE |

|                |         |          |         |        |        |       |
|----------------|---------|----------|---------|--------|--------|-------|
| hsa-miR-30a*   | CENPW   | -7.91061 |         |        |        | FALSE |
| hsa-miR-652    | GLT8D2  | -7.90912 |         |        |        | FALSE |
| hsa-miR-30d*   | COL11A1 | -7.90889 |         |        |        | FALSE |
| hsa-miR-194    | GLT8D2  | -7.90857 |         |        |        | FALSE |
| hsa-miR-192    | TNC     | -7.90647 |         |        |        | FALSE |
| hsa-miR-93     | LMOD1   | -7.90572 | -0.1183 |        |        | FALSE |
| hsa-miR-126*   | COL11A1 | -7.90519 |         |        |        | FALSE |
| hsa-miR-101    | CEP55   | -7.89854 | -1.1844 | -0.373 |        | FALSE |
| hsa-miR-942    | CACNA1C | -7.89828 |         |        |        | FALSE |
| hsa-miR-22*    | ZBTB26  | -7.8972  |         |        |        | FALSE |
| hsa-miR-651    | RHOJ    | -7.8964  |         |        |        | FALSE |
| hsa-miR-141*   | PDLIM3  | -7.8955  |         |        |        | FALSE |
| hsa-miR-15a    | CNN1    | -7.89517 |         | -0.069 |        | FALSE |
| hsa-miR-15b*   | EMCN    | -7.89427 |         |        |        | FALSE |
| hsa-miR-200a   | CRTAP   | -7.89403 |         | -0.094 |        | FALSE |
| hsa-miR-200a   | MMP2    | -7.89376 |         |        |        | FALSE |
| hsa-miR-200a   | COL1A2  | -7.89131 |         |        |        | FALSE |
| hsa-miR-148b   | TSHZ3   | -7.88754 | -0.6453 |        |        | FALSE |
| hsa-miR-577    | MXRA8   | -7.88734 |         |        |        | FALSE |
| hsa-miR-107    | ACTG2   | -7.88692 |         |        |        | FALSE |
| hsa-miR-141    | AEBP1   | -7.88421 |         | -0.103 | 0.1667 | FALSE |
| hsa-miR-200b*  | C1S     | -7.88239 |         |        |        | FALSE |
| hsa-miR-194*   | MXRA8   | -7.87989 |         |        |        | FALSE |
| hsa-miR-425    | PODN    | -7.87894 |         |        |        | FALSE |
| hsa-miR-574-3p | RPS3A   | -7.87767 |         |        |        | FALSE |
| hsa-miR-532-3p | TNFAIP6 | -7.87606 |         |        |        | FALSE |
| hsa-miR-429    | BNC2    | -7.87352 |         | -0.542 | 0.9253 | FALSE |
| hsa-miR-200c*  | MMP2    | -7.87351 |         |        |        | FALSE |
| hsa-miR-141    | LDB2    | -7.86994 | -0.1194 |        |        | FALSE |
| hsa-miR-29c    | NCAPH   | -7.86911 |         |        |        | FALSE |
| hsa-miR-363    | FSTL3   | -7.86846 |         |        |        | FALSE |
| hsa-miR-30e*   | GREM1   | -7.86702 |         |        |        | FALSE |
| hsa-miR-324-5p | SSPN    | -7.86694 |         |        |        | FALSE |
| hsa-miR-192    | FHL3    | -7.86638 |         |        |        | FALSE |
| hsa-miR-30d*   | INHBA   | -7.86542 |         |        |        | FALSE |
| hsa-miR-200c*  | PMP22   | -7.86522 |         |        |        | FALSE |
| hsa-miR-200c*  | ECM2    | -7.86376 |         |        |        | FALSE |
| hsa-miR-19b-1* | PODN    | -7.86364 |         |        |        | FALSE |
| hsa-miR-200b*  | TSHZ3   | -7.8631  |         |        |        | FALSE |
| hsa-miR-15a    | IGF2    | -7.86029 |         | -0.02  |        | FALSE |
| hsa-miR-16     | LMOD1   | -7.85848 | -0.1444 | -0.144 | 0.46   | FALSE |
| hsa-miR-532-5p | SFRP2   | -7.85742 |         |        |        | FALSE |
| hsa-miR-22     | ZNF3    | -7.85466 |         |        |        | FALSE |
| hsa-miR-194*   | FAP     | -7.85437 |         |        |        | FALSE |
| hsa-miR-423-3p | PLAC9   | -7.8538  |         |        |        | FALSE |



|                |          |          |         |        |        |       |
|----------------|----------|----------|---------|--------|--------|-------|
| hsa-miR-200a*  | COL1A2   | -7.85372 |         |        |        | FALSE |
| hsa-miR-194*   | COL5A1   | -7.85322 |         |        |        | FALSE |
| hsa-miR-130a   | NSF      | -7.85193 |         |        |        | FALSE |
| hsa-miR-19b-1* | MRVI1    | -7.85104 |         |        |        | FALSE |
| hsa-miR-382    | NFATC2IP | -7.84408 |         |        |        | FALSE |
| hsa-miR-200b   | ITGA5    | -7.84318 |         |        |        | FALSE |
| hsa-miR-192    | PDLIM7   | -7.84263 |         |        |        | FALSE |
| hsa-miR-200a*  | NEXN     | -7.8422  |         |        |        | FALSE |
| hsa-miR-577    | LHFP     | -7.84197 |         |        |        | FALSE |
| hsa-miR-200b   | ARSI     | -7.84123 |         |        |        | FALSE |
| hsa-miR-30e*   | CTHRC1   | -7.84108 |         |        |        | FALSE |
| hsa-miR-15b    | ECM2     | -7.84004 |         |        |        | FALSE |
| hsa-miR-532-5p | TPM2     | -7.83849 |         |        |        | FALSE |
| hsa-miR-194*   | HTRA3    | -7.83743 |         |        |        | FALSE |
| hsa-miR-32     | DCN      | -7.83701 |         |        |        | FALSE |
| hsa-miR-29a    | PANK3    | -7.8302  |         |        |        | FALSE |
| hsa-miR-200b*  | GAS1     | -7.82836 |         |        |        | FALSE |
| hsa-miR-183    | DAB2     | -7.82811 |         |        |        | FALSE |
| hsa-miR-330-5p | RPL15    | -7.82661 |         |        |        | FALSE |
| hsa-miR-30d*   | ITGA5    | -7.82619 |         |        |        | FALSE |
| hsa-miR-200a*  | PMP22    | -7.82438 |         |        |        | FALSE |
| hsa-miR-183    | FLI1     | -7.82387 |         |        |        | FALSE |
| hsa-miR-200c*  | CDH11    | -7.82287 |         |        |        | FALSE |
| hsa-miR-92a    | TREM2    | -7.82213 |         |        |        | FALSE |
| hsa-miR-29c    | DLGAP5   | -7.82167 |         |        |        | FALSE |
| hsa-miR-200b   | FAM26E   | -7.82015 |         | -0.064 |        | FALSE |
| hsa-miR-429    | NEDD4    | -7.82008 | -0.4165 | -0.274 |        | FALSE |
| hsa-miR-651    | PLN      | -7.81968 |         |        |        | FALSE |
| hsa-miR-340    | PTK6     | -7.81953 |         |        |        | FALSE |
| hsa-miR-183    | HLA-DPA1 | -7.81921 |         |        |        | FALSE |
| hsa-miR-326    | RPL18A   | -7.8183  |         |        |        | FALSE |
| hsa-miR-29c*   | LAMB1    | -7.81743 |         |        |        | FALSE |
| hsa-miR-191    | CALD1    | -7.81687 |         |        |        | FALSE |
| hsa-miR-25     | CSRP1    | -7.81664 |         |        |        | FALSE |
| hsa-miR-29c    | TEX10    | -7.81599 |         |        |        | FALSE |
| hsa-miR-660    | ITGA3    | -7.81294 |         |        |        | FALSE |
| hsa-miR-141    | CXCL12   | -7.81242 |         | -0.729 | 0.862  | FALSE |
| hsa-miR-30e    | COL5A2   | -7.81188 | -0.303  | -0.233 |        | FALSE |
| hsa-miR-183    | GIMAP6   | -7.81185 |         |        |        | FALSE |
| hsa-miR-30d*   | POSTN    | -7.8089  |         |        |        | FALSE |
| hsa-miR-182    | DPYD     | -7.8081  | -0.2225 | -0.185 |        | FALSE |
| hsa-miR-92a-1* | ZCCHC24  | -7.80671 |         |        |        | FALSE |
| hsa-miR-26a    | DEPDC1   | -7.80654 | -1.1091 | -0.54  | 0.0103 | FALSE |
| hsa-miR-200b*  | HTRA3    | -7.80513 |         |        |        | FALSE |
| hsa-miR-18a    | CX3CR1   | -7.80501 |         |        |        | FALSE |

|                 |          |          |         |        |        |       |
|-----------------|----------|----------|---------|--------|--------|-------|
| hsa-miR-200b*   | FN1      | -7.8044  |         |        |        | FALSE |
| hsa-miR-92a     | IGFBP7   | -7.80397 |         |        |        | FALSE |
| hsa-miR-200c*   | LDB2     | -7.80272 |         |        |        | FALSE |
| hsa-miR-30d*    | GPX8     | -7.80224 |         |        |        | FALSE |
| hsa-miR-29c     | WDHD1    | -7.80187 |         |        |        | FALSE |
| hsa-miR-210     | CLEC3B   | -7.80164 |         |        |        | FALSE |
| hsa-miR-425*    | CALD1    | -7.80043 |         |        |        | FALSE |
| hsa-miR-200c*   | SLC39A13 | -7.79954 |         |        |        | FALSE |
| hsa-miR-101     | CCNB2    | -7.79923 |         |        |        | FALSE |
| hsa-miR-652     | HTRA3    | -7.797   |         |        |        | FALSE |
| hsa-miR-192     | GAS1     | -7.79525 |         |        |        | FALSE |
| hsa-miR-200c*   | FSTL1    | -7.79236 |         |        |        | FALSE |
| hsa-miR-671-5p  | SPARCL1  | -7.78921 |         |        |        | FALSE |
| hsa-miR-200c*   | OLFML2B  | -7.78895 |         |        |        | FALSE |
| hsa-miR-429     | C1S      | -7.78678 |         |        |        | FALSE |
| hsa-miR-7       | LMOD1    | -7.78618 |         |        |        | FALSE |
| hsa-miR-200a*   | COL5A1   | -7.78339 |         |        |        | FALSE |
| hsa-miR-20b     | FSTL3    | -7.78265 |         |        |        | FALSE |
| hsa-miR-191*    | NEXN     | -7.78037 |         |        |        | FALSE |
| hsa-miR-200b    | OLFML2B  | -7.7796  |         |        |        | FALSE |
| hsa-miR-21*     | ATP1B2   | -7.77354 |         |        |        | FALSE |
| hsa-miR-200c    | GNG2     | -7.77288 | -0.5892 | -0.167 |        | FALSE |
| hsa-miR-200a*   | OLFML3   | -7.77178 |         |        |        | FALSE |
| hsa-miR-200a    | ATP8B2   | -7.77072 |         |        |        | FALSE |
| hsa-miR-532-3p  | ASPN     | -7.77045 |         |        |        | FALSE |
| hsa-miR-30d*    | SULF1    | -7.76963 |         |        |        | FALSE |
| hsa-miR-3200-3p | RRAS     | -7.7693  |         |        |        | FALSE |
| hsa-miR-20b     | C19orf33 | -7.76686 |         |        |        | FALSE |
| hsa-miR-200b*   | FSTL1    | -7.76662 |         |        |        | FALSE |
| hsa-miR-194*    | UBTD1    | -7.76661 |         |        |        | FALSE |
| hsa-miR-20a     | PBXIP1   | -7.76584 |         | -0.201 |        | FALSE |
| hsa-miR-26a-1*  | COL6A3   | -7.76547 |         |        |        | FALSE |
| hsa-miR-25      | LRP10    | -7.7653  |         |        |        | FALSE |
| hsa-miR-194*    | PDLIM7   | -7.76518 |         |        |        | FALSE |
| hsa-miR-423-3p  | CNRIP1   | -7.76489 |         |        |        | FALSE |
| hsa-miR-19b     | PODN     | -7.764   |         |        |        | FALSE |
| hsa-miR-200a    | QKI      | -7.76255 | -0.1484 | -0.289 | 0.4041 | FALSE |
| hsa-miR-486-5p  | SFRP4    | -7.75878 |         |        |        | FALSE |
| hsa-miR-323-3p  | TRADD    | -7.75667 |         |        |        | FALSE |
| hsa-miR-128     | RAB31    | -7.75496 |         |        |        | FALSE |
| hsa-miR-33b     | SHROOM4  | -7.75373 |         | -0.089 |        | FALSE |
| hsa-miR-200b*   | MMP2     | -7.75204 |         |        |        | FALSE |
| hsa-miR-29c     | KDELC1   | -7.75183 | -0.4583 | -0.321 | 0.1985 | FALSE |
| hsa-miR-93      | C10orf54 | -7.75118 |         |        |        | FALSE |
| hsa-miR-200b*   | MYLK     | -7.75097 |         |        |        | FALSE |

|                 |          |          |         |         |       |
|-----------------|----------|----------|---------|---------|-------|
| hsa-miR-19a     | TK2      | -7.74989 | -0.8938 | -0.5286 | FALSE |
| hsa-miR-16      | CACNA1C  | -7.74934 |         |         | FALSE |
| hsa-miR-425*    | PLN      | -7.74894 |         |         | FALSE |
| hsa-miR-942     | PODN     | -7.74595 |         |         | FALSE |
| hsa-miR-22*     | KDM3B    | -7.74448 |         |         | FALSE |
| hsa-miR-194*    | SCARF2   | -7.74437 |         |         | FALSE |
| hsa-miR-141*    | TIMP3    | -7.74416 |         |         | FALSE |
| hsa-miR-17      | SNED1    | -7.74313 |         |         | FALSE |
| hsa-miR-191     | TGFB11   | -7.74308 |         |         | FALSE |
| hsa-miR-423-3p  | ANGPTL1  | -7.74199 |         |         | FALSE |
| hsa-miR-17      | PODN     | -7.74131 |         | -0.101  | FALSE |
| hsa-miR-192*    | PTRF     | -7.73937 |         |         | FALSE |
| hsa-miR-134     | ULK3     | -7.7391  |         |         | FALSE |
| hsa-miR-30a*    | TROAP    | -7.73851 |         |         | FALSE |
| hsa-miR-141     | FERMT2   | -7.73816 |         |         | FALSE |
| hsa-miR-410     | TAPBP    | -7.73717 |         |         | FALSE |
| hsa-miR-200b*   | AEBP1    | -7.73421 |         |         | FALSE |
| hsa-miR-200a*   | LHFP     | -7.73326 |         |         | FALSE |
| hsa-miR-200c    | AXL      | -7.73236 |         |         | FALSE |
| hsa-miR-30a     | SFPQ     | -7.73215 | -0.3484 |         | FALSE |
| hsa-miR-652     | PLN      | -7.72934 |         |         | FALSE |
| hsa-miR-192*    | COL5A1   | -7.72865 |         |         | FALSE |
| hsa-miR-106b    | PTRF     | -7.72837 |         | -0.043  | FALSE |
| hsa-miR-18a     | SPATA18  | -7.7279  |         |         | FALSE |
| hsa-miR-125a-5p | EXOSC3   | -7.72645 |         |         | FALSE |
| hsa-miR-17      | RCAN2    | -7.72641 |         |         | FALSE |
| hsa-miR-335*    | CDKN1A   | -7.72206 |         |         | FALSE |
| hsa-miR-200a*   | JAM3     | -7.72042 |         |         | FALSE |
| hsa-miR-130a    | RETSAT   | -7.71987 |         |         | FALSE |
| hsa-miR-181c    | ALDOA    | -7.71923 |         |         | FALSE |
| hsa-miR-194*    | DCN      | -7.71834 |         |         | FALSE |
| hsa-miR-15b     | ZCCHC24  | -7.71817 |         |         | FALSE |
| hsa-miR-429     | PDCD1LG2 | -7.71711 |         |         | FALSE |
| hsa-miR-93*     | COL6A3   | -7.71604 |         |         | FALSE |
| hsa-miR-200b*   | OLFML2B  | -7.7139  |         |         | FALSE |
| hsa-miR-101     | LOXL2    | -7.71347 |         |         | FALSE |
| hsa-miR-200b    | COL6A2   | -7.71327 |         |         | FALSE |
| hsa-miR-93      | PBXIP1   | -7.71301 |         | -0.201  | FALSE |
| hsa-miR-127-3p  | RASSF7   | -7.71288 |         |         | FALSE |
| hsa-miR-30b     | TNFAIP6  | -7.71275 |         |         | FALSE |
| hsa-miR-15b     | DCN      | -7.7109  |         |         | FALSE |
| hsa-miR-99a     | RRM2     | -7.70772 |         |         | FALSE |
| hsa-miR-125a-5p | HMMR     | -7.70673 |         |         | FALSE |
| hsa-miR-200b    | LGALS1   | -7.70632 |         |         | FALSE |
| hsa-miR-651     | ANTXR2   | -7.70622 |         |         | FALSE |

|                  |           |          |         |        |        |       |
|------------------|-----------|----------|---------|--------|--------|-------|
| hsa-miR-532-5p   | ITGA5     | -7.70253 |         |        |        | FALSE |
| hsa-miR-3065-5p  | PLN       | -7.70077 |         |        |        | FALSE |
| hsa-miR-148b     | SNAI2     | -7.69948 |         |        |        | FALSE |
| hsa-miR-125a-5p  | BIRC5     | -7.69881 |         |        |        | FALSE |
| hsa-miR-485-3p   | CRB3      | -7.69852 |         |        |        | FALSE |
| hsa-miR-29c*     | LEPRE1    | -7.69834 |         |        |        | FALSE |
| hsa-miR-30a      | TOP2A     | -7.69698 |         |        |        | FALSE |
| hsa-miR-20b      | MVP       | -7.69669 |         |        |        | FALSE |
| hsa-miR-33a      | DAB2      | -7.69298 |         |        |        | FALSE |
| hsa-miR-29c      | ORC1      | -7.69116 |         |        |        | FALSE |
| hsa-miR-30d*     | DACT1     | -7.69103 |         |        |        | FALSE |
| hsa-miR-1976     | CNN1      | -7.69094 |         |        |        | FALSE |
| hsa-miR-20b      | EHD2      | -7.69042 |         |        |        | FALSE |
| hsa-miR-200b     | FN1       | -7.68986 | -2.0821 | -0.529 | 0.2779 | FALSE |
| hsa-miR-223*     | YPEL1     | -7.6889  |         |        |        | FALSE |
| hsa-miR-361-3p   | YWHAE     | -7.68764 |         |        |        | FALSE |
| hsa-miR-15a      | CYS1      | -7.6851  |         |        |        | FALSE |
| hsa-miR-149      | PTPN22    | -7.68492 |         |        |        | FALSE |
| hsa-miR-93*      | MS4A2     | -7.68396 |         |        |        | FALSE |
| hsa-miR-500a*    | PDLIM7    | -7.68248 |         |        |        | FALSE |
| hsa-miR-30d*     | THBS2     | -7.68216 |         |        |        | FALSE |
| hsa-miR-182      | FAM20A    | -7.68007 |         |        |        | FALSE |
| hsa-miR-651      | GLT8D2    | -7.67956 |         |        |        | FALSE |
| hsa-miR-339-3p   | ANTXR1    | -7.67945 |         |        |        | FALSE |
| hsa-miR-429      | LIX1L     | -7.67926 |         |        |        | FALSE |
| hsa-miR-425*     | NEXN      | -7.67777 |         |        |        | FALSE |
| hsa-miR-141*     | COL1A2    | -7.67529 |         |        |        | FALSE |
| hsa-miR-30a      | KIF20A    | -7.67398 |         |        |        | FALSE |
| hsa-miR-19b      | CBX7      | -7.67327 | -0.2408 | -0.249 | 0.9047 | FALSE |
| hsa-miR-17*      | CTSA      | -7.67245 |         |        |        | FALSE |
| hsa-miR-194      | DCN       | -7.67209 |         |        |        | FALSE |
| hsa-miR-200c*    | FIBIN     | -7.67106 |         |        |        | FALSE |
| hsa-miR-339-3p   | GPR124    | -7.66999 |         |        |        | FALSE |
| hsa-miR-30c      | LUM       | -7.66833 |         |        |        | FALSE |
| hsa-miR-410      | ULK3      | -7.66493 |         |        |        | FALSE |
| hsa-miR-219-1-3p | FAP       | -7.66468 |         |        |        | FALSE |
| hsa-miR-33b      | PDE2A     | -7.66064 |         |        |        | FALSE |
| hsa-miR-200a     | NEXN      | -7.65976 | -0.6713 | -0.23  | 0.167  | FALSE |
| hsa-miR-19b      | ZCCHC24   | -7.65898 |         |        |        | FALSE |
| hsa-miR-185      | GTF2IRD2B | -7.6567  |         |        |        | FALSE |
| hsa-miR-200c*    | ACTA2     | -7.65611 |         |        |        | FALSE |
| hsa-miR-101      | KIAA0101  | -7.65595 |         |        |        | FALSE |
| hsa-miR-200b*    | ATP8B2    | -7.65575 |         |        |        | FALSE |
| hsa-miR-200b*    | GNG2      | -7.65502 |         |        |        | FALSE |
| hsa-miR-148a     | PNMA1     | -7.65312 | -0.9256 | -0.27  | 0.0142 | FALSE |

|                 |           |          |         |        |        |       |
|-----------------|-----------|----------|---------|--------|--------|-------|
| hsa-miR-148b    | AEBP1     | -7.65305 |         |        |        | FALSE |
| hsa-miR-1307    | PDE1A     | -7.65258 |         |        |        | FALSE |
| hsa-miR-181c*   | SOD2      | -7.6512  |         |        |        | FALSE |
| hsa-miR-144*    | ITGA11    | -7.65008 |         |        |        | FALSE |
| hsa-miR-301a    | LRP10     | -7.64902 |         |        |        | FALSE |
| hsa-miR-30e*    | SNAI2     | -7.64896 |         |        |        | FALSE |
| hsa-let-7e*     | IFNG      | -7.6489  |         |        |        | FALSE |
| hsa-miR-200a*   | COL6A3    | -7.64715 |         |        |        | FALSE |
| hsa-miR-192     | FRMD6     | -7.64687 |         |        |        | FALSE |
| hsa-miR-7-1*    | TGFB11    | -7.64641 |         |        |        | FALSE |
| hsa-miR-192     | CYTH3     | -7.64619 |         |        |        | FALSE |
| hsa-miR-16-2*   | SGCD      | -7.64186 |         |        |        | FALSE |
| hsa-miR-33a     | SERPING1  | -7.64088 |         |        |        | FALSE |
| hsa-miR-3677-3p | FCER1A    | -7.64078 |         |        |        | FALSE |
| hsa-miR-200b*   | MRC2      | -7.64073 |         |        |        | FALSE |
| hsa-miR-16-2*   | TIMP3     | -7.64068 |         |        |        | FALSE |
| hsa-miR-101     | CDC6      | -7.64028 |         |        |        | FALSE |
| hsa-miR-3615    | PLAC9     | -7.63933 |         |        |        | FALSE |
| hsa-miR-29b-1*  | PBX1      | -7.63852 |         |        |        | FALSE |
| hsa-miR-181c*   | SPR       | -7.63803 |         |        |        | FALSE |
| hsa-let-7e*     | SQRDL     | -7.63681 |         |        |        | FALSE |
| hsa-miR-425     | SNED1     | -7.63677 |         |        |        | FALSE |
| hsa-miR-425*    | DACT3     | -7.63039 |         |        |        | FALSE |
| hsa-miR-200a*   | TAGLN     | -7.62948 |         |        |        | FALSE |
| hsa-miR-30a     | MKI67     | -7.62935 |         |        |        | FALSE |
| hsa-miR-200b*   | RASL12    | -7.62776 |         |        |        | FALSE |
| hsa-miR-937     | SH3BGRL   | -7.62702 |         |        |        | FALSE |
| hsa-miR-100     | SLC26A6   | -7.62442 |         |        |        | FALSE |
| hsa-miR-483-5p  | CREBL2    | -7.62413 |         |        |        | FALSE |
| hsa-miR-29c     | CD276     | -7.62329 | -0.3058 | -0.262 | 0.881  | FALSE |
| hsa-miR-200b*   | COL1A2    | -7.62087 |         |        |        | FALSE |
| hsa-miR-3065-3p | C21orf7   | -7.62036 |         |        |        | FALSE |
| hsa-miR-29c     | CCNB2     | -7.61981 |         |        |        | FALSE |
| hsa-miR-18a     | PIK3IP1   | -7.61887 |         | -0.074 |        | FALSE |
| hsa-miR-200a    | LAMA4     | -7.61801 |         |        |        | FALSE |
| hsa-miR-30e*    | FN1       | -7.61747 |         |        |        | FALSE |
| hsa-miR-150     | HDAC2     | -7.61731 |         |        |        | FALSE |
| hsa-miR-103a-2* | GPR124    | -7.61396 |         |        |        | FALSE |
| hsa-miR-3614-5p | DACT3     | -7.61285 |         |        |        | FALSE |
| hsa-miR-652     | ANTXR1    | -7.61209 |         |        |        | FALSE |
| hsa-miR-16-2*   | AOC3      | -7.61144 |         |        |        | FALSE |
| hsa-miR-29c     | POLR3D    | -7.6099  |         | -0.036 | 0.0108 | FALSE |
| hsa-miR-301a    | MYH11     | -7.60951 | -0.1511 | -0.198 |        | FALSE |
| hsa-miR-25      | ITM2B     | -7.60691 | -1.592  | -0.246 | 0.3648 | FALSE |
| hsa-miR-101     | ARHGAP11/ | -7.60534 |         |        |        | FALSE |

|                 |          |          |         |         |        |       |
|-----------------|----------|----------|---------|---------|--------|-------|
| hsa-miR-29c     | GNAI3    | -7.60459 |         |         |        | FALSE |
| hsa-miR-942     | PBXIP1   | -7.60335 |         |         |        | FALSE |
| hsa-miR-429     | FLI1     | -7.60283 | -1.2904 | -0.453  |        | FALSE |
| hsa-miR-500a*   | ITGA3    | -7.60218 |         |         |        | FALSE |
| hsa-miR-532-3p  | FAP      | -7.60092 |         |         |        | FALSE |
| hsa-let-7i*     | PLA2G12A | -7.60079 |         |         |        | FALSE |
| hsa-miR-200b    | ATP8B2   | -7.60032 |         |         |        | FALSE |
| hsa-miR-145*    | DNA2     | -7.59956 |         |         |        | FALSE |
| hsa-miR-200c    | LDB2     | -7.59954 |         |         |        | FALSE |
| hsa-miR-425*    | PMP22    | -7.59801 |         |         |        | FALSE |
| hsa-miR-3065-5p | MSRB3    | -7.59771 |         |         |        | FALSE |
| hsa-miR-200c*   | ZFPM2    | -7.59624 |         |         |        | FALSE |
| hsa-miR-200c    | FERMT2   | -7.59429 | -0.6769 | -0.239  | 0.1485 | FALSE |
| hsa-miR-199b-3p | DHTKD1   | -7.59379 |         |         |        | FALSE |
| hsa-miR-214     | KIAA1468 | -7.59325 | -0.1895 |         |        | FALSE |
| hsa-miR-96      | AXL      | -7.59252 |         |         |        | FALSE |
| hsa-miR-92a-1*  | IL1R1    | -7.59206 |         |         |        | FALSE |
| hsa-miR-136*    | NFATC2IP | -7.59132 |         |         |        | FALSE |
| hsa-miR-16-2*   | LRRC32   | -7.59107 |         |         |        | FALSE |
| hsa-miR-101*    | CKAP4    | -7.59035 |         |         |        | FALSE |
| hsa-miR-223     | TRIM45   | -7.58888 |         |         |        | FALSE |
| hsa-miR-141     | KANK2    | -7.58879 |         | -0.1588 | 0.109  | FALSE |
| hsa-miR-200b    | SNAI2    | -7.58849 | -1.0851 | -0.2135 | 0.1792 | FALSE |
| hsa-miR-194     | CNN1     | -7.58766 |         |         |        | FALSE |
| hsa-let-7e*     | GZMH     | -7.58765 |         |         |        | FALSE |
| hsa-miR-192     | ZCCHC24  | -7.58695 |         |         |        | FALSE |
| hsa-miR-92a-1*  | ARHGAP1  | -7.58627 |         |         |        | FALSE |
| hsa-miR-19a     | PODN     | -7.58618 |         |         |        | FALSE |
| hsa-miR-577     | ECM2     | -7.58572 |         |         |        | FALSE |
| hsa-miR-106b    | STOM     | -7.58276 | -0.6323 | -0.3745 |        | FALSE |
| hsa-miR-16      | HMCN1    | -7.58262 |         |         |        | FALSE |
| hsa-miR-92a     | RNASE6   | -7.58257 |         |         |        | FALSE |
| hsa-miR-16-2*   | EMCN     | -7.58242 |         |         |        | FALSE |
| hsa-miR-16-2*   | CACNA1C  | -7.58215 |         |         |        | FALSE |
| hsa-miR-15b*    | IL33     | -7.58148 |         |         |        | FALSE |
| hsa-miR-106b*   | CLN5     | -7.58129 |         |         |        | FALSE |
| hsa-miR-22      | ACVR2B   | -7.57954 |         | -0.219  | 0.3257 | FALSE |
| hsa-miR-22*     | SP4      | -7.57913 |         |         |        | FALSE |
| hsa-miR-577     | COL5A1   | -7.57906 |         |         |        | FALSE |
| hsa-miR-93      | OGN      | -7.57847 | -0.753  |         |        | FALSE |
| hsa-miR-107     | HTRA3    | -7.57764 |         |         |        | FALSE |
| hsa-miR-1226    | ASPN     | -7.57547 |         |         |        | FALSE |
| hsa-miR-425*    | MMP2     | -7.57447 |         |         |        | FALSE |
| hsa-miR-141     | FAP      | -7.57371 | -0.9753 | -0.301  | 0.1737 | FALSE |
| hsa-miR-29c     | GINS1    | -7.57205 |         | -0.034  | 0.0107 | FALSE |

|                 |           |          |         |        |       |
|-----------------|-----------|----------|---------|--------|-------|
| hsa-miR-141*    | DACT1     | -7.57127 |         |        | FALSE |
| hsa-miR-92a     | TMEM59    | -7.57092 |         |        | FALSE |
| hsa-miR-29b-1*  | GPRASP1   | -7.57058 |         |        | FALSE |
| hsa-miR-210     | MGP       | -7.56828 |         |        | FALSE |
| hsa-miR-107     | TAGLN     | -7.568   |         |        | FALSE |
| hsa-miR-194*    | GAS6      | -7.56792 |         |        | FALSE |
| hsa-miR-29c     | CHEK1     | -7.56732 |         |        | FALSE |
| hsa-miR-370     | HSBP1L1   | -7.56727 |         |        | FALSE |
| hsa-miR-212     | GTF2IRD2B | -7.5657  |         |        | FALSE |
| hsa-miR-101     | LRRC59    | -7.56502 |         |        | FALSE |
| hsa-miR-155     | ARHGAP32  | -7.56454 |         |        | FALSE |
| hsa-miR-200b    | COL3A1    | -7.56383 | -0.2198 |        | FALSE |
| hsa-miR-101     | PKM       | -7.563   |         |        | FALSE |
| hsa-miR-21*     | ZNF540    | -7.56281 |         |        | FALSE |
| hsa-miR-429     | EMP3      | -7.56269 |         |        | FALSE |
| hsa-miR-194     | NXN       | -7.56223 |         |        | FALSE |
| hsa-miR-141*    | VIM       | -7.56166 |         |        | FALSE |
| hsa-miR-200b    | TSHZ3     | -7.56133 |         |        | FALSE |
| hsa-miR-22      | TFAP4     | -7.5603  |         |        | FALSE |
| hsa-miR-127-3p  | NFATC2IP  | -7.55941 |         |        | FALSE |
| hsa-miR-18b     | FYCO1     | -7.5594  |         |        | FALSE |
| hsa-miR-18b     | LRP10     | -7.55827 |         |        | FALSE |
| hsa-miR-577     | GLT8D2    | -7.55793 |         |        | FALSE |
| hsa-miR-194*    | SFRP2     | -7.55705 |         |        | FALSE |
| hsa-miR-425     | TNS1      | -7.55313 |         |        | FALSE |
| hsa-miR-200a*   | LMOD1     | -7.55201 |         |        | FALSE |
| hsa-miR-200b*   | P4HA3     | -7.55102 |         |        | FALSE |
| hsa-miR-331-5p  | LMOD1     | -7.55003 |         |        | FALSE |
| hsa-miR-15b     | OGN       | -7.54948 |         |        | FALSE |
| hsa-miR-194*    | CTGF      | -7.54932 |         |        | FALSE |
| hsa-miR-106b    | NEXN      | -7.54906 | -0.1115 |        | FALSE |
| hsa-miR-21*     | ZFP2      | -7.54849 |         |        | FALSE |
| hsa-miR-200a    | PTRF      | -7.54797 |         |        | FALSE |
| hsa-miR-33b     | LTBP3     | -7.54779 |         | -0.113 | FALSE |
| hsa-miR-106a    | MVP       | -7.54708 |         |        | FALSE |
| hsa-miR-25      | PHLDA3    | -7.54647 |         |        | FALSE |
| hsa-miR-200b    | GNG2      | -7.54577 | -0.5892 | -0.167 | FALSE |
| hsa-miR-141*    | COL6A3    | -7.54573 |         |        | FALSE |
| hsa-miR-210     | LDB2      | -7.54294 |         |        | FALSE |
| hsa-miR-194*    | TAGLN     | -7.54219 |         |        | FALSE |
| hsa-miR-3677-3p | CYBRD1    | -7.54006 |         |        | FALSE |
| hsa-miR-21*     | DNAJC4    | -7.53964 |         |        | FALSE |
| hsa-miR-942     | OGN       | -7.53949 |         |        | FALSE |
| hsa-miR-210     | ITM2A     | -7.53824 |         |        | FALSE |
| hsa-miR-877     | ASPN      | -7.53661 |         |        | FALSE |

|                 |         |          |         |        |        |       |
|-----------------|---------|----------|---------|--------|--------|-------|
| hsa-miR-200c    | CCDC80  | -7.53634 |         |        |        | FALSE |
| hsa-miR-423-3p  | BGN     | -7.5351  |         |        |        | FALSE |
| hsa-miR-181d    | HPSE    | -7.535   |         |        |        | FALSE |
| hsa-miR-324-5p  | TPSB2   | -7.53497 |         |        |        | FALSE |
| hsa-miR-30e*    | MMP1    | -7.53491 |         |        |        | FALSE |
| hsa-miR-30a     | CCNB2   | -7.53456 |         |        |        | FALSE |
| hsa-miR-192     | HTRA1   | -7.53375 |         | -0.099 | 0.0897 | FALSE |
| hsa-miR-200b    | COL6A3  | -7.53349 |         |        |        | FALSE |
| hsa-miR-3200-3p | FLT3LG  | -7.53316 |         |        |        | FALSE |
| hsa-miR-339-3p  | CYS1    | -7.5322  |         |        |        | FALSE |
| hsa-miR-337-3p  | PSME2   | -7.53207 |         |        |        | FALSE |
| hsa-miR-651     | PODN    | -7.53179 |         |        |        | FALSE |
| hsa-miR-1296    | PSMB10  | -7.53082 |         |        |        | FALSE |
| hsa-miR-200b    | LIX1L   | -7.52939 |         |        |        | FALSE |
| hsa-miR-3615    | DACT3   | -7.52894 |         |        |        | FALSE |
| hsa-miR-32      | ACTA2   | -7.52877 |         |        |        | FALSE |
| hsa-miR-200c*   | DCHS1   | -7.52821 |         |        |        | FALSE |
| hsa-miR-141*    | GPR124  | -7.52787 |         |        |        | FALSE |
| hsa-miR-30c     | CFH     | -7.52532 |         |        |        | FALSE |
| hsa-miR-16-2*   | ACTA2   | -7.52517 |         |        |        | FALSE |
| hsa-let-7g*     | CPA3    | -7.52512 |         |        |        | FALSE |
| hsa-miR-200a*   | C1S     | -7.52454 |         |        |        | FALSE |
| hsa-miR-200a*   | MMP2    | -7.52332 |         |        |        | FALSE |
| hsa-miR-194*    | COL1A2  | -7.52301 |         |        |        | FALSE |
| hsa-miR-141     | GNG11   | -7.52217 |         |        |        | FALSE |
| hsa-miR-210     | ISCU    | -7.52196 | -1.0988 | -0.437 | 0.2418 | FALSE |
| hsa-miR-23a*    | GADD45G | -7.52165 |         |        |        | FALSE |
| hsa-miR-15b*    | ASPN    | -7.51879 |         |        |        | FALSE |
| hsa-miR-92a     | VAMP5   | -7.51823 |         |        |        | FALSE |
| hsa-miR-101     | ASPM    | -7.51823 |         |        |        | FALSE |
| hsa-miR-652     | CALD1   | -7.51821 |         |        |        | FALSE |
| hsa-miR-25      | POLD4   | -7.51676 |         |        |        | FALSE |
| hsa-miR-576-5p  | MS4A2   | -7.51641 |         |        |        | FALSE |
| hsa-miR-141     | EMCN    | -7.51396 | -0.668  | -0.305 | 0.1667 | FALSE |
| hsa-miR-22      | NSMCE4A | -7.51291 | -0.1654 |        |        | FALSE |
| hsa-miR-532-5p  | FHL3    | -7.5113  |         |        |        | FALSE |
| hsa-miR-148b    | MXRA5   | -7.50916 |         |        |        | FALSE |
| hsa-let-7a*     | MGAT4A  | -7.50897 |         |        |        | FALSE |
| hsa-miR-141     | FILIP1L | -7.50866 |         |        |        | FALSE |
| hsa-miR-454     | SGCD    | -7.50706 |         |        |        | FALSE |
| hsa-miR-93      | ITM2B   | -7.50487 |         |        |        | FALSE |
| hsa-miR-148b    | COL5A2  | -7.50295 |         |        |        | FALSE |
| hsa-miR-183     | GIMAP5  | -7.50267 |         |        |        | FALSE |
| hsa-miR-2355-3p | BCL2    | -7.50258 |         |        |        | FALSE |
| hsa-miR-30c     | KIF26B  | -7.50141 |         |        |        | FALSE |



|                 |           |          |         |        |        |       |
|-----------------|-----------|----------|---------|--------|--------|-------|
| hsa-miR-625     | SGCD      | -7.50134 |         |        |        | FALSE |
| hsa-miR-200b    | PDE2A     | -7.50116 |         |        |        | FALSE |
| hsa-miR-141*    | TIMP2     | -7.50085 |         |        |        | FALSE |
| hsa-miR-30a     | NUSAP1    | -7.50024 |         |        |        | FALSE |
| hsa-miR-200c    | KDELC1    | -7.49939 | -1.2499 | -0.486 | 0.2071 | FALSE |
| hsa-miR-19b-1*  | PBXIP1    | -7.49915 |         |        |        | FALSE |
| hsa-miR-191     | MMP2      | -7.49834 |         |        |        | FALSE |
| hsa-miR-200a    | ADAMTS12  | -7.49785 |         |        |        | FALSE |
| hsa-miR-92a     | PQLC3     | -7.49766 | -0.6099 |        |        | FALSE |
| hsa-miR-15b*    | MSRB3     | -7.49528 |         |        |        | FALSE |
| hsa-miR-92a-1*  | AEBP1     | -7.49419 |         |        |        | FALSE |
| hsa-miR-223     | ZNF446    | -7.49316 |         |        |        | FALSE |
| hsa-miR-22      | BRD8      | -7.49312 |         |        |        | FALSE |
| hsa-miR-379     | FUK       | -7.49136 |         |        |        | FALSE |
| hsa-miR-425     | PLSCR4    | -7.49091 | -0.6764 | -0.638 | 0.1428 | FALSE |
| hsa-miR-652     | CNN1      | -7.4907  |         |        |        | FALSE |
| hsa-miR-191     | GLT8D2    | -7.4907  |         |        |        | FALSE |
| hsa-miR-199a-5p | NFATC2IP  | -7.48754 | -0.1775 | -0.185 | 0.0687 | FALSE |
| hsa-miR-18a*    | ECM2      | -7.48727 |         |        |        | FALSE |
| hsa-miR-200a    | TIMP2     | -7.4866  |         |        |        | FALSE |
| hsa-miR-15b     | COMP      | -7.48604 |         |        |        | FALSE |
| hsa-miR-378     | LEPRE1    | -7.48594 |         |        |        | FALSE |
| hsa-miR-200a*   | GPR124    | -7.48456 |         |        |        | FALSE |
| hsa-miR-101     | CCNB1     | -7.4834  |         | -0.125 |        | FALSE |
| hsa-let-7e*     | MLKL      | -7.48334 |         |        |        | FALSE |
| hsa-miR-181c    | GRPEL1    | -7.48047 | -0.1949 |        |        | FALSE |
| hsa-miR-21      | POLR3B    | -7.48031 | -1.2326 | -0.462 |        | FALSE |
| hsa-miR-200b*   | SNAI2     | -7.48005 |         |        |        | FALSE |
| hsa-miR-376c    | CCNDBP1   | -7.47989 |         |        |        | FALSE |
| hsa-miR-505     | SPARCL1   | -7.47815 |         |        |        | FALSE |
| hsa-miR-30a     | NCAPH     | -7.47623 |         |        |        | FALSE |
| hsa-miR-194*    | COL10A1   | -7.47171 |         |        |        | FALSE |
| hsa-miR-22*     | SMAD4     | -7.47143 |         |        |        | FALSE |
| hsa-miR-16-2*   | LAMA2     | -7.47141 |         |        |        | FALSE |
| hsa-miR-589*    | SYNE1     | -7.46897 |         |        |        | FALSE |
| hsa-miR-17*     | TAGLN     | -7.46849 |         |        |        | FALSE |
| hsa-miR-378     | GLT8D2    | -7.46842 |         |        |        | FALSE |
| hsa-miR-99a     | AURKA     | -7.46764 |         |        |        | FALSE |
| hsa-miR-937     | GTF2IRD2B | -7.46478 |         |        |        | FALSE |
| hsa-miR-92a-1*  | ASPN      | -7.46329 |         |        |        | FALSE |
| hsa-miR-3615    | MGP       | -7.46309 |         |        |        | FALSE |
| hsa-miR-141*    | HTRA3     | -7.46304 |         |        |        | FALSE |
| hsa-miR-192*    | CNRIP1    | -7.46247 |         |        |        | FALSE |
| hsa-miR-30a*    | E2F2      | -7.46214 |         |        |        | FALSE |
| hsa-miR-101     | CCNA2     | -7.46124 |         |        |        | FALSE |

|                 |          |          |         |         |        |       |
|-----------------|----------|----------|---------|---------|--------|-------|
| hsa-miR-186     | MYH11    | -7.46117 |         |         |        | FALSE |
| hsa-miR-20a     | ITGBL1   | -7.46096 |         | -0.163  |        | FALSE |
| hsa-miR-627     | GPR124   | -7.46081 |         |         |        | FALSE |
| hsa-miR-200b*   | KDELC1   | -7.46079 |         |         |        | FALSE |
| hsa-miR-194*    | CMTM3    | -7.4607  |         |         |        | FALSE |
| hsa-miR-194*    | FIBIN    | -7.45865 |         |         |        | FALSE |
| hsa-miR-22*     | SCAPER   | -7.45849 |         |         |        | FALSE |
| hsa-miR-181c    | PPIF     | -7.45589 | -0.4411 |         |        | FALSE |
| hsa-miR-410     | TRADD    | -7.45562 |         |         |        | FALSE |
| hsa-miR-200b*   | OLFML3   | -7.45525 |         |         |        | FALSE |
| hsa-miR-664     | CCNA2    | -7.45511 |         |         |        | FALSE |
| hsa-miR-429     | FAM26E   | -7.45341 |         | -0.064  |        | FALSE |
| hsa-miR-423-3p  | PODN     | -7.45313 |         |         |        | FALSE |
| hsa-miR-183     | GIMAP7   | -7.45135 |         |         |        | FALSE |
| hsa-miR-18b     | COL8A1   | -7.45017 |         |         |        | FALSE |
| hsa-miR-192*    | ASPN     | -7.44893 |         |         |        | FALSE |
| hsa-miR-30e     | LOXL2    | -7.4487  |         |         |        | FALSE |
| hsa-miR-30e*    | COL6A3   | -7.44627 |         |         |        | FALSE |
| hsa-miR-200a    | ECM2     | -7.44618 | -0.1637 |         |        | FALSE |
| hsa-miR-21      | GKAP1    | -7.44553 |         |         |        | FALSE |
| hsa-miR-24-2*   | KAT6B    | -7.44543 |         |         |        | FALSE |
| hsa-miR-194     | FERMT2   | -7.44351 | -0.4885 | -0.299  |        | FALSE |
| hsa-miR-92a-1*  | LMOD1    | -7.44326 |         |         |        | FALSE |
| hsa-miR-19b     | CNN1     | -7.44288 |         |         |        | FALSE |
| hsa-miR-222     | CXXC4    | -7.44239 |         |         |        | FALSE |
| hsa-miR-493*    | HDHD3    | -7.44239 |         |         |        | FALSE |
| hsa-miR-200b*   | EDNRA    | -7.44232 |         |         |        | FALSE |
| hsa-miR-652     | CORIN    | -7.44217 |         |         |        | FALSE |
| hsa-miR-30a     | FOXM1    | -7.43838 |         |         |        | FALSE |
| hsa-miR-125a-5p | AURKA    | -7.43818 |         |         |        | FALSE |
| hsa-miR-200c*   | GALNTL2  | -7.43814 |         |         |        | FALSE |
| hsa-miR-141*    | RASL12   | -7.43793 |         |         |        | FALSE |
| hsa-miR-429     | NID2     | -7.43599 |         |         |        | FALSE |
| hsa-miR-18a     | TNFSF12  | -7.43577 |         |         |        | FALSE |
| hsa-miR-17      | PRELP    | -7.43535 |         | -0.0374 |        | FALSE |
| hsa-miR-96      | FLI1     | -7.43376 |         |         |        | FALSE |
| hsa-miR-130a    | KIF13B   | -7.4333  |         |         |        | FALSE |
| hsa-miR-200b    | NRP1     | -7.43204 | -0.1305 |         |        | FALSE |
| hsa-miR-30e*    | SERPINE1 | -7.43197 |         |         |        | FALSE |
| hsa-miR-22*     | ALDH6A1  | -7.43183 |         |         |        | FALSE |
| hsa-miR-15b     | CNN1     | -7.43179 |         | -0.069  |        | FALSE |
| hsa-miR-15a     | ARL2     | -7.43036 | -0.3551 | -0.421  | 0.9432 | FALSE |
| hsa-miR-651     | JAM3     | -7.42979 |         |         |        | FALSE |
| hsa-miR-16-2*   | CPA3     | -7.4283  |         |         |        | FALSE |
| hsa-miR-148b    | COL6A2   | -7.42714 |         |         |        | FALSE |

|                 |          |          |         |        |        |       |
|-----------------|----------|----------|---------|--------|--------|-------|
| hsa-miR-200b*   | ANGPTL2  | -7.42664 |         |        |        | FALSE |
| hsa-miR-423-3p  | CPA3     | -7.42635 |         |        |        | FALSE |
| hsa-miR-148b    | COL3A1   | -7.42587 |         |        |        | FALSE |
| hsa-miR-19a     | OGN      | -7.42291 |         |        |        | FALSE |
| hsa-miR-1180    | KCNMB1   | -7.42193 |         |        |        | FALSE |
| hsa-miR-339-5p  | PODN     | -7.42184 |         |        |        | FALSE |
| hsa-miR-29b     | KDELFC1  | -7.42136 | -0.4583 | -0.321 | 0.1985 | FALSE |
| hsa-miR-7-1*    | MSRB3    | -7.4213  |         |        |        | FALSE |
| hsa-miR-92a-1*  | ECM2     | -7.42091 |         |        |        | FALSE |
| hsa-miR-22      | ZNF620   | -7.4203  |         |        |        | FALSE |
| hsa-miR-32      | FN1      | -7.41998 |         |        |        | FALSE |
| hsa-miR-141     | MYCT1    | -7.41993 |         |        |        | FALSE |
| hsa-miR-125a-5p | CHAC2    | -7.41676 |         |        |        | FALSE |
| hsa-miR-19b     | HEPH     | -7.41557 |         |        |        | FALSE |
| hsa-miR-200a*   | ARSI     | -7.41438 |         |        |        | FALSE |
| hsa-miR-19a     | LTBP3    | -7.41425 |         |        |        | FALSE |
| hsa-miR-429     | OLFML2B  | -7.41312 |         |        |        | FALSE |
| hsa-miR-18a     | PRELP    | -7.41233 |         |        |        | FALSE |
| hsa-miR-93*     | MRVI1    | -7.41228 |         |        |        | FALSE |
| hsa-miR-200c    | PPAPDC3  | -7.41226 |         |        |        | FALSE |
| hsa-miR-21*     | C22orf32 | -7.41208 |         |        |        | FALSE |
| hsa-miR-22*     | EPC1     | -7.40982 |         |        |        | FALSE |
| hsa-miR-92a-1*  | HTRA1    | -7.40974 |         |        |        | FALSE |
| hsa-miR-15b*    | CASQ2    | -7.40964 |         |        |        | FALSE |
| hsa-miR-200b    | VIM      | -7.40963 |         |        |        | FALSE |
| hsa-miR-429     | ECM2     | -7.4094  |         |        |        | FALSE |
| hsa-miR-30b     | GLIPR1   | -7.40913 |         |        |        | FALSE |
| hsa-miR-664     | BIRC5    | -7.40785 |         |        |        | FALSE |
| hsa-miR-141     | SPARCL1  | -7.40757 |         |        |        | FALSE |
| hsa-miR-30d*    | MFAP5    | -7.40707 |         |        |        | FALSE |
| hsa-miR-200a*   | SERPING1 | -7.40651 |         |        |        | FALSE |
| hsa-miR-200c*   | THY1     | -7.40596 |         |        |        | FALSE |
| hsa-miR-16      | OGN      | -7.40508 |         |        |        | FALSE |
| hsa-miR-29c     | DBN1     | -7.40429 |         |        |        | FALSE |
| hsa-miR-107     | LMOD1    | -7.40354 | -0.1196 | -0.145 | 0.0093 | FALSE |
| hsa-miR-29c     | CDCA4    | -7.40054 | -0.2709 | -0.159 | 0.4287 | FALSE |
| hsa-miR-423-3p  | CNN1     | -7.40009 |         |        |        | FALSE |
| hsa-miR-194     | COL5A2   | -7.3996  |         |        |        | FALSE |
| hsa-miR-18b     | SCN7A    | -7.39861 |         |        |        | FALSE |
| hsa-miR-200c*   | EMP3     | -7.39845 |         |        |        | FALSE |
| hsa-miR-429     | IKBIP    | -7.39701 |         |        |        | FALSE |
| hsa-miR-200a*   | FN1      | -7.39532 |         |        |        | FALSE |
| hsa-miR-660     | FAP      | -7.39532 |         |        |        | FALSE |
| hsa-miR-19b     | FYCO1    | -7.39513 |         |        |        | FALSE |
| hsa-miR-19a     | ZCCHC24  | -7.39249 |         |        |        | FALSE |

|                 |          |          |       |
|-----------------|----------|----------|-------|
| hsa-miR-101     | PGM3     | -7.39161 | FALSE |
| hsa-miR-324-3p  | IGFBP7   | -7.39049 | FALSE |
| hsa-miR-17      | ECM2     | -7.39039 | FALSE |
| hsa-miR-21*     | NDRG2    | -7.38922 | FALSE |
| hsa-miR-629*    | PBXIP1   | -7.38743 | FALSE |
| hsa-miR-141     | PMP22    | -7.38684 | FALSE |
| hsa-miR-18a     | SERINC1  | -7.3865  | FALSE |
| hsa-miR-379     | AP1G2    | -7.38563 | FALSE |
| hsa-miR-92a     | LMOD1    | -7.38545 | FALSE |
| hsa-miR-1227    | GAPT     | -7.38529 | FALSE |
| hsa-miR-33a*    | PKIG     | -7.38446 | FALSE |
| hsa-miR-130b*   | MVP      | -7.38441 | FALSE |
| hsa-miR-141*    | P4HA3    | -7.38299 | FALSE |
| hsa-miR-15b     | BGN      | -7.38246 | FALSE |
| hsa-miR-3127-5p | OGN      | -7.38195 | FALSE |
| hsa-miR-200a    | ARHGAP31 | -7.38163 | FALSE |
| hsa-miR-200b    | CMTM3    | -7.38028 | FALSE |
| hsa-miR-16-2*   | HMCN1    | -7.38016 | FALSE |
| hsa-miR-210     | COL14A1  | -7.38011 | FALSE |
| hsa-miR-141     | ARHGAP31 | -7.37977 | FALSE |
| hsa-miR-223*    | ZBED5    | -7.37921 | FALSE |
| hsa-miR-22      | PCMTD2   | -7.3784  | FALSE |
| hsa-miR-30a*    | CCNB1    | -7.3759  | FALSE |
| hsa-miR-30d*    | NEXN     | -7.37392 | FALSE |
| hsa-miR-16-2*   | ENPP2    | -7.37172 | FALSE |
| hsa-miR-421     | LMOD1    | -7.37098 | FALSE |
| hsa-miR-193a-5p | RPAIN    | -7.37048 | FALSE |
| hsa-miR-495     | TRADD    | -7.37028 | FALSE |
| hsa-miR-93*     | OGN      | -7.3685  | FALSE |
| hsa-miR-577     | TIMP3    | -7.36846 | FALSE |
| hsa-miR-194*    | TIMP3    | -7.36812 | FALSE |
| hsa-miR-149     | HLA-DMB  | -7.36795 | FALSE |
| hsa-miR-30a     | E2F2     | -7.36641 | FALSE |
| hsa-miR-671-5p  | EMCN     | -7.36294 | FALSE |
| hsa-miR-423-3p  | MGP      | -7.36281 | FALSE |
| hsa-miR-30d*    | FMOD     | -7.36268 | FALSE |
| hsa-miR-126*    | COL8A2   | -7.36257 | FALSE |
| hsa-miR-200a    | C1R      | -7.36025 | FALSE |
| hsa-miR-627     | MRVI1    | -7.35979 | FALSE |
| hsa-miR-20b     | CAST     | -7.35949 | FALSE |
| hsa-miR-141*    | CTHRC1   | -7.35923 | FALSE |
| hsa-miR-577     | MRVI1    | -7.35914 | FALSE |
| hsa-miR-200c    | MXRA8    | -7.359   | FALSE |
| hsa-miR-16-2*   | ZEB1     | -7.35856 | FALSE |
| hsa-miR-15b     | IGF2     | -7.35523 | FALSE |

|                 |         |          |         |         |        |       |
|-----------------|---------|----------|---------|---------|--------|-------|
| hsa-miR-200b*   | PCOLCE  | -7.35512 |         |         |        | FALSE |
| hsa-miR-141*    | FAP     | -7.35507 |         |         |        | FALSE |
| hsa-miR-141*    | FILIP1L | -7.35478 |         |         |        | FALSE |
| hsa-miR-30d*    | ARSI    | -7.35348 |         |         |        | FALSE |
| hsa-miR-25      | CFH     | -7.35193 |         |         |        | FALSE |
| hsa-miR-181c    | TUBA1C  | -7.35183 |         |         |        | FALSE |
| hsa-miR-425*    | GAS7    | -7.35104 |         |         |        | FALSE |
| hsa-let-7a*     | DNAJB9  | -7.35083 |         |         |        | FALSE |
| hsa-miR-3065-5p | ENTPD1  | -7.35057 |         |         |        | FALSE |
| hsa-miR-101     | MELK    | -7.34952 | -0.247  |         |        | FALSE |
| hsa-miR-16-2*   | GPR124  | -7.34862 |         |         |        | FALSE |
| hsa-miR-590-5p  | ZCCHC24 | -7.34838 |         |         |        | FALSE |
| hsa-miR-192*    | COL1A2  | -7.34834 |         |         |        | FALSE |
| hsa-miR-106b    | ZCCHC24 | -7.34777 |         |         |        | FALSE |
| hsa-miR-20a     | OGN     | -7.3476  | -0.7523 |         |        | FALSE |
| hsa-miR-590-5p  | AKAP13  | -7.34655 |         |         |        | FALSE |
| hsa-miR-194*    | TGFB11  | -7.34331 |         |         |        | FALSE |
| hsa-miR-19a     | C3      | -7.34245 |         |         |        | FALSE |
| hsa-miR-200c*   | HTRA1   | -7.34243 |         |         |        | FALSE |
| hsa-miR-423-3p  | GPR124  | -7.34181 |         |         |        | FALSE |
| hsa-miR-93*     | FAP     | -7.34177 |         |         |        | FALSE |
| hsa-miR-223     | YPEL1   | -7.34124 | -0.1209 | -0.1565 | 0.0836 | FALSE |
| hsa-miR-425     | AKAP13  | -7.33968 |         |         |        | FALSE |
| hsa-miR-25      | MR1     | -7.339   |         |         |        | FALSE |
| hsa-miR-200a*   | QKI     | -7.33882 |         |         |        | FALSE |
| hsa-miR-3127-5p | NNMT    | -7.33798 |         |         |        | FALSE |
| hsa-miR-889     | TRADD   | -7.33773 |         |         |        | FALSE |
| hsa-miR-200b*   | COL5A1  | -7.33765 |         |         |        | FALSE |
| hsa-miR-127-3p  | CCDC125 | -7.33763 |         |         |        | FALSE |
| hsa-miR-379     | TMEM80  | -7.33608 |         |         |        | FALSE |
| hsa-miR-96      | MSRB3   | -7.33336 |         |         |        | FALSE |
| hsa-miR-766     | LMBRD1  | -7.33319 |         |         |        | FALSE |
| hsa-miR-200a*   | COL3A1  | -7.33313 |         |         |        | FALSE |
| hsa-miR-425     | PRELP   | -7.33157 | -0.1038 |         |        | FALSE |
| hsa-miR-29b-2*  | COL5A2  | -7.33085 |         |         |        | FALSE |
| hsa-miR-30d     | TNFAIP6 | -7.33007 |         |         |        | FALSE |
| hsa-miR-194     | RAB31   | -7.33    | -0.4531 | -0.127  |        | FALSE |
| hsa-miR-16      | SPON1   | -7.32676 |         |         |        | FALSE |
| hsa-miR-30e*    | TNFAIP6 | -7.3256  |         |         |        | FALSE |
| hsa-miR-502-3p  | MSRB3   | -7.32514 |         |         |        | FALSE |
| hsa-miR-1307    | PFDN5   | -7.3245  |         |         |        | FALSE |
| hsa-miR-30a     | AVEN    | -7.32319 | -0.8692 | -0.679  | 0.447  | FALSE |
| hsa-miR-21      | ING5    | -7.32315 |         |         |        | FALSE |
| hsa-miR-22*     | SIRT1   | -7.32268 |         |         |        | FALSE |
| hsa-miR-29c*    | COL5A1  | -7.32046 |         |         |        | FALSE |

|                  |          |          |         |         |        |  |       |
|------------------|----------|----------|---------|---------|--------|--|-------|
| hsa-miR-30d*     | LEPRE1   | -7.31968 |         |         |        |  | FALSE |
| hsa-miR-30d*     | ECM2     | -7.31965 |         |         |        |  | FALSE |
| hsa-miR-200b     | COL1A2   | -7.31882 |         |         |        |  | FALSE |
| hsa-miR-219-1-3p | SERPING1 | -7.31696 |         |         |        |  | FALSE |
| hsa-miR-17       | MS4A2    | -7.31633 |         |         |        |  | FALSE |
| hsa-miR-29c*     | MAP4K4   | -7.31628 |         |         |        |  | FALSE |
| hsa-miR-22*      | PCM1     | -7.31623 |         |         |        |  | FALSE |
| hsa-miR-125a-5p  | SKA1     | -7.31586 |         | -0.1098 |        |  | FALSE |
| hsa-miR-16-2*    | F13A1    | -7.31518 |         |         |        |  | FALSE |
| hsa-miR-29b-1*   | LMOD1    | -7.31486 |         |         |        |  | FALSE |
| hsa-miR-200c*    | TAGLN    | -7.31304 |         |         |        |  | FALSE |
| hsa-miR-30d      | GPX8     | -7.3125  |         |         |        |  | FALSE |
| hsa-miR-194      | CYTH3    | -7.31173 |         |         |        |  | FALSE |
| hsa-miR-148b     | CALD1    | -7.31157 |         |         |        |  | FALSE |
| hsa-miR-30d*     | PTRF     | -7.31093 |         |         |        |  | FALSE |
| hsa-miR-200a*    | AKAP2    | -7.31055 |         |         |        |  | FALSE |
| hsa-miR-99a      | LDHA     | -7.3105  |         |         |        |  | FALSE |
| hsa-miR-20a      | PODN     | -7.30928 |         | -0.101  |        |  | FALSE |
| hsa-miR-194      | RBMS3    | -7.3087  |         |         |        |  | FALSE |
| hsa-miR-200b     | MMP2     | -7.30707 |         |         |        |  | FALSE |
| hsa-miR-3677-3p  | PBXIP1   | -7.30675 |         |         |        |  | FALSE |
| hsa-miR-142-5p   | ARHGAP32 | -7.30669 |         |         |        |  | FALSE |
| hsa-miR-30d*     | PRRX1    | -7.30668 |         |         |        |  | FALSE |
| hsa-miR-210      | SYNE1    | -7.3061  |         |         |        |  | FALSE |
| hsa-miR-500a*    | ASPN     | -7.30545 |         |         |        |  | FALSE |
| hsa-miR-34a      | TMEFF1   | -7.30531 | -1.0941 | -0.254  | 0.1503 |  | FALSE |
| hsa-miR-106b     | MYOF     | -7.30317 |         |         |        |  | FALSE |
| hsa-miR-17*      | LMOD1    | -7.30256 |         |         |        |  | FALSE |
| hsa-miR-1296     | LST1     | -7.30211 |         |         |        |  | FALSE |
| hsa-miR-29b-2*   | ARSI     | -7.30195 |         |         |        |  | FALSE |
| hsa-miR-194*     | CERCAM   | -7.30187 |         |         |        |  | FALSE |
| hsa-miR-576-5p   | CACNA1C  | -7.3006  |         |         |        |  | FALSE |
| hsa-miR-183      | GIMAP2   | -7.30054 |         |         |        |  | FALSE |
| hsa-miR-9        | MYOF     | -7.29979 |         |         |        |  | FALSE |
| hsa-miR-22       | ZNF830   | -7.29972 |         |         |        |  | FALSE |
| hsa-miR-106a     | MYOF     | -7.29969 |         |         |        |  | FALSE |
| hsa-miR-590-5p   | SNED1    | -7.29879 |         | -0.069  | 0.0574 |  | FALSE |
| hsa-miR-141*     | TAGLN    | -7.2987  |         |         |        |  | FALSE |
| hsa-miR-141*     | ACTA2    | -7.29714 |         |         |        |  | FALSE |
| hsa-miR-30d*     | ITGA11   | -7.297   |         |         |        |  | FALSE |
| hsa-miR-651      | BGN      | -7.29681 |         |         |        |  | FALSE |
| hsa-miR-200a     | OSTM1    | -7.29678 |         |         |        |  | FALSE |
| hsa-miR-15b      | SSC5D    | -7.29595 |         |         |        |  | FALSE |
| hsa-miR-328      | SFN      | -7.29594 |         |         |        |  | FALSE |
| hsa-miR-30a      | DLGAP5   | -7.2956  |         |         |        |  | FALSE |

|                 |         |          |         |         |        |       |
|-----------------|---------|----------|---------|---------|--------|-------|
| hsa-miR-29c*    | COL5A2  | -7.29546 |         |         |        | FALSE |
| hsa-miR-191     | MS4A2   | -7.29527 |         |         |        | FALSE |
| hsa-miR-30d     | GLT8D2  | -7.29251 |         |         |        | FALSE |
| hsa-miR-30d     | ASPN    | -7.29195 |         |         |        | FALSE |
| hsa-miR-103a-2* | PODN    | -7.2919  |         |         |        | FALSE |
| hsa-miR-32      | OMD     | -7.29102 |         |         |        | FALSE |
| hsa-miR-181c    | ARPC1A  | -7.29084 | -0.9283 | -0.155  |        | FALSE |
| hsa-miR-30c     | OLFML2B | -7.29038 | -0.2293 |         |        | FALSE |
| hsa-miR-16-2*   | JAM2    | -7.28961 |         |         |        | FALSE |
| hsa-miR-29c     | NT5DC2  | -7.28907 |         |         |        | FALSE |
| hsa-miR-145     | DNA2    | -7.28876 |         |         |        | FALSE |
| hsa-miR-93      | SNED1   | -7.28804 |         |         |        | FALSE |
| hsa-miR-421     | PRELP   | -7.28645 |         |         |        | FALSE |
| hsa-miR-200a*   | ZFPM2   | -7.28629 |         |         |        | FALSE |
| hsa-miR-15b     | C1QTNF7 | -7.2862  |         |         |        | FALSE |
| hsa-miR-409-3p  | HSBP1L1 | -7.2857  |         |         |        | FALSE |
| hsa-miR-29a     | PRPSAP2 | -7.28548 |         |         |        | FALSE |
| hsa-miR-451     | COL10A1 | -7.28542 |         |         |        | FALSE |
| hsa-miR-141     | CCDC80  | -7.28448 | -1.231  | -0.342  | 0.3871 | FALSE |
| hsa-miR-27a*    | ZNF446  | -7.28317 |         |         |        | FALSE |
| hsa-miR-3127-5p | NEGR1   | -7.28253 |         |         |        | FALSE |
| hsa-miR-200c*   | PTRF    | -7.2814  |         |         |        | FALSE |
| hsa-miR-192*    | COL6A2  | -7.28084 |         |         |        | FALSE |
| hsa-miR-30e*    | P4HA2   | -7.27998 |         |         |        | FALSE |
| hsa-miR-192*    | ECM2    | -7.27831 |         |         |        | FALSE |
| hsa-miR-200b*   | EMP3    | -7.27799 |         |         |        | FALSE |
| hsa-miR-144*    | COL10A1 | -7.27788 |         |         |        | FALSE |
| hsa-miR-1307    | NNMT    | -7.27683 |         |         |        | FALSE |
| hsa-miR-101     | MAPK6   | -7.27662 | -0.6562 | -0.359  | 0.2893 | FALSE |
| hsa-miR-576-5p  | MYH11   | -7.27628 |         |         |        | FALSE |
| hsa-miR-181c    | GAPDH   | -7.2741  |         |         |        | FALSE |
| hsa-miR-21      | PAIP2B  | -7.27334 | -0.2043 | -0.4263 | 0.3157 | FALSE |
| hsa-miR-200b    | P4HA3   | -7.27306 |         |         |        | FALSE |
| hsa-miR-192     | ASPN    | -7.27301 |         |         |        | FALSE |
| hsa-miR-378     | CTHRC1  | -7.27256 |         |         |        | FALSE |
| hsa-miR-576-5p  | PLAC9   | -7.27151 |         |         |        | FALSE |
| hsa-miR-194     | ADAM12  | -7.27149 | -0.2645 |         |        | FALSE |
| hsa-miR-3200-3p | MMP28   | -7.27089 |         |         |        | FALSE |
| hsa-miR-141     | FBN1    | -7.26828 |         |         |        | FALSE |
| hsa-miR-615-3p  | MYOF    | -7.26818 |         |         |        | FALSE |
| hsa-miR-423-3p  | IGFBP7  | -7.26765 |         |         |        | FALSE |
| hsa-miR-3200-3p | PSMB10  | -7.26745 |         |         |        | FALSE |
| hsa-miR-326     | RPS6    | -7.26737 |         |         |        | FALSE |
| hsa-miR-101     | MCM10   | -7.26663 |         |         |        | FALSE |
| hsa-miR-30d     | COL5A2  | -7.26432 | -0.3076 | -0.233  |        | FALSE |

|                 |          |          |         |         |        |       |
|-----------------|----------|----------|---------|---------|--------|-------|
| hsa-miR-589     | PBXIP1   | -7.263   |         |         |        | FALSE |
| hsa-miR-20b     | SBDS     | -7.26296 |         |         |        | FALSE |
| hsa-miR-425*    | ECM2     | -7.26262 |         |         |        | FALSE |
| hsa-miR-149     | FGL2     | -7.26229 |         |         |        | FALSE |
| hsa-miR-33a     | SYNE1    | -7.26126 |         |         |        | FALSE |
| hsa-miR-92a-1*  | ITGA11   | -7.26068 |         |         |        | FALSE |
| hsa-miR-19b-1*  | BGN      | -7.25853 |         |         |        | FALSE |
| hsa-miR-200c*   | FBN1     | -7.25763 |         |         |        | FALSE |
| hsa-miR-223     | PCMTD2   | -7.25717 |         |         |        | FALSE |
| hsa-miR-664     | DLGAP5   | -7.25556 |         |         |        | FALSE |
| hsa-miR-429     | HEG1     | -7.25511 | -0.2132 | -0.518  | 0.2559 | FALSE |
| hsa-miR-375     | ALPK2    | -7.25477 |         |         |        | FALSE |
| hsa-miR-22*     | KIF27    | -7.25447 |         |         |        | FALSE |
| hsa-miR-940     | CYBRD1   | -7.25359 |         |         |        | FALSE |
| hsa-miR-590-5p  | ZBTB4    | -7.253   |         |         |        | FALSE |
| hsa-miR-411     | CDK5RAP3 | -7.25219 |         |         |        | FALSE |
| hsa-miR-141*    | COL5A2   | -7.25174 |         |         |        | FALSE |
| hsa-miR-141     | COL6A3   | -7.25172 |         |         |        | FALSE |
| hsa-miR-19a     | PRELP    | -7.25147 |         |         |        | FALSE |
| hsa-miR-141*    | AGTR1    | -7.25036 |         |         |        | FALSE |
| hsa-miR-92a     | OLFML3   | -7.25029 |         |         |        | FALSE |
| hsa-miR-194*    | FBLN5    | -7.24901 |         |         |        | FALSE |
| hsa-miR-25      | STOM     | -7.249   | -0.1863 | -0.2453 |        | FALSE |
| hsa-miR-18a     | HPGDS    | -7.24843 |         |         |        | FALSE |
| hsa-miR-93      | CFH      | -7.24731 |         |         |        | FALSE |
| hsa-miR-30e*    | POSTN    | -7.24712 |         |         |        | FALSE |
| hsa-miR-590-5p  | SHROOM4  | -7.24603 |         |         |        | FALSE |
| hsa-miR-30a     | CCNF     | -7.24507 | -0.2247 | -0.111  |        | FALSE |
| hsa-miR-664     | KIAA1524 | -7.2449  |         |         |        | FALSE |
| hsa-miR-33a*    | KCTD12   | -7.2448  |         |         |        | FALSE |
| hsa-miR-106b    | LATS2    | -7.24474 | -0.2204 |         |        | FALSE |
| hsa-miR-130b    | GAPT     | -7.24471 |         |         |        | FALSE |
| hsa-miR-660     | COL5A2   | -7.2432  |         |         |        | FALSE |
| hsa-miR-194     | CTHRC1   | -7.24268 | -0.7742 |         |        | FALSE |
| hsa-miR-105     | CARD11   | -7.24265 |         |         |        | FALSE |
| hsa-miR-423-3p  | OGN      | -7.24254 |         |         |        | FALSE |
| hsa-miR-205     | INPPL1   | -7.24203 | -0.4287 | -0.297  | 0.4264 | FALSE |
| hsa-miR-1180    | DCN      | -7.24202 |         |         |        | FALSE |
| hsa-miR-942     | C1QTNF7  | -7.24199 |         |         |        | FALSE |
| hsa-miR-30d*    | LAMA4    | -7.24173 |         |         |        | FALSE |
| hsa-miR-32      | BNC2     | -7.24115 |         | -0.077  |        | FALSE |
| hsa-miR-32      | TIMP2    | -7.24112 |         |         |        | FALSE |
| hsa-miR-192     | TGFB11   | -7.24108 |         |         |        | FALSE |
| hsa-miR-3127-5p | CNRIP1   | -7.24024 |         |         |        | FALSE |
| hsa-miR-18b     | HPGDS    | -7.24022 |         |         |        | FALSE |



|                |         |          |         |       |       |
|----------------|---------|----------|---------|-------|-------|
| hsa-miR-194    | LEPRE1  | -7.23914 |         |       | FALSE |
| hsa-miR-3615   | MYL9    | -7.23875 |         |       | FALSE |
| hsa-miR-200a*  | POSTN   | -7.23861 |         |       | FALSE |
| hsa-miR-423-3p | ASPN    | -7.23856 |         |       | FALSE |
| hsa-miR-181c   | ENO1    | -7.23836 |         |       | FALSE |
| hsa-miR-874    | RPL35   | -7.2379  |         |       | FALSE |
| hsa-miR-532-5p | HTRA3   | -7.23722 |         |       | FALSE |
| hsa-miR-93     | PLN     | -7.23648 |         |       | FALSE |
| hsa-miR-127-3p | HSBP1L1 | -7.23642 |         |       | FALSE |
| hsa-miR-200a   | SYDE1   | -7.23532 |         |       | FALSE |
| hsa-miR-3615   | PODN    | -7.23519 |         |       | FALSE |
| hsa-miR-214    | C4orf29 | -7.23489 |         |       | FALSE |
| hsa-miR-652    | NOX4    | -7.23456 |         |       | FALSE |
| hsa-miR-1180   | MYL12A  | -7.23442 |         |       | FALSE |
| hsa-miR-30c-2* | DDX39A  | -7.23408 |         |       | FALSE |
| hsa-miR-129-5p | GBP2    | -7.23396 |         |       | FALSE |
| hsa-miR-149    | CTSS    | -7.23389 |         |       | FALSE |
| hsa-miR-200a*  | C1R     | -7.23387 |         |       | FALSE |
| hsa-miR-214*   | L2HGDH  | -7.23368 |         |       | FALSE |
| hsa-miR-616*   | CACNA1C | -7.23356 |         |       | FALSE |
| hsa-miR-760    | MVP     | -7.23291 |         |       | FALSE |
| hsa-miR-200a*  | CNN1    | -7.23172 |         |       | FALSE |
| hsa-miR-192    | RBMS3   | -7.22964 |         |       | FALSE |
| hsa-miR-200b*  | BGN     | -7.22902 |         |       | FALSE |
| hsa-miR-192    | MXRA8   | -7.22764 |         |       | FALSE |
| hsa-miR-30a    | NDC80   | -7.22749 |         |       | FALSE |
| hsa-miR-18a*   | MGP     | -7.22717 |         |       | FALSE |
| hsa-miR-15b*   | ZEB1    | -7.22702 |         |       | FALSE |
| hsa-miR-197    | IGFBP7  | -7.22691 |         |       | FALSE |
| hsa-miR-15b*   | MYLK    | -7.22681 |         |       | FALSE |
| hsa-miR-7-1*   | HMCN1   | -7.22549 |         |       | FALSE |
| hsa-miR-379    | ECHDC2  | -7.2248  |         |       | FALSE |
| hsa-miR-194    | PODNL1  | -7.22382 |         |       | FALSE |
| hsa-miR-26b*   | COL6A3  | -7.22299 |         |       | FALSE |
| hsa-miR-92b    | YPEL5   | -7.22254 |         |       | FALSE |
| hsa-miR-411    | AP1G2   | -7.2223  |         |       | FALSE |
| hsa-miR-92a-1* | CACNA1C | -7.22219 |         |       | FALSE |
| hsa-miR-192    | COL6A1  | -7.22105 |         |       | FALSE |
| hsa-miR-22     | RBBP4   | -7.22022 |         |       | FALSE |
| hsa-miR-101*   | LAMB1   | -7.21955 |         |       | FALSE |
| hsa-miR-200b*  | DACT1   | -7.21952 |         |       | FALSE |
| hsa-miR-18a    | C1QTNF7 | -7.21743 | -0.1356 | -0.11 | FALSE |
| hsa-miR-210    | PDE2A   | -7.21729 |         |       | FALSE |
| hsa-miR-19a    | SYNE1   | -7.21694 | -0.2386 |       | FALSE |
| hsa-miR-130b   | EFCAB14 | -7.21644 | -0.1008 |       | FALSE |

|                 |          |          |         |        |        |       |
|-----------------|----------|----------|---------|--------|--------|-------|
| hsa-miR-590-3p  | CACNA1C  | -7.21635 |         |        |        | FALSE |
| hsa-miR-148b    | P4HA3    | -7.21508 |         |        |        | FALSE |
| hsa-miR-96      | ZEB1     | -7.21455 | -1.0339 |        |        | FALSE |
| hsa-miR-145*    | ANKZF1   | -7.21364 |         |        |        | FALSE |
| hsa-miR-629*    | PPP1R12B | -7.21334 |         |        |        | FALSE |
| hsa-miR-106b    | ECM2     | -7.21267 |         |        |        | FALSE |
| hsa-let-7f-1*   | DNAJB9   | -7.21238 |         |        |        | FALSE |
| hsa-miR-339-3p  | CALD1    | -7.2123  |         |        |        | FALSE |
| hsa-miR-200b    | PCOLCE   | -7.21062 |         |        |        | FALSE |
| hsa-miR-200c*   | COL8A2   | -7.21034 |         |        |        | FALSE |
| hsa-miR-21      | MTERFD3  | -7.21027 |         |        |        | FALSE |
| hsa-miR-30c     | RAB31    | -7.20886 | -0.3219 |        |        | FALSE |
| hsa-miR-18a     | SYNE1    | -7.20827 |         |        |        | FALSE |
| hsa-miR-92a     | SSPN     | -7.20658 |         |        |        | FALSE |
| hsa-miR-21      | ZNF493   | -7.20646 |         |        |        | FALSE |
| hsa-miR-18a     | AHNAK    | -7.2063  |         |        |        | FALSE |
| hsa-miR-29b-2*  | FAP      | -7.20619 |         |        |        | FALSE |
| hsa-miR-30a     | CENPF    | -7.20551 |         |        |        | FALSE |
| hsa-miR-328     | RPL24    | -7.20495 |         |        |        | FALSE |
| hsa-miR-15b*    | SFRP4    | -7.20469 |         |        |        | FALSE |
| hsa-miR-3127-5p | PLAC9    | -7.20433 |         |        |        | FALSE |
| hsa-miR-194*    | GAS1     | -7.20393 |         |        |        | FALSE |
| hsa-miR-93      | CNN1     | -7.20303 | -0.9474 | -0.277 | 0.1658 | FALSE |
| hsa-miR-214     | CCDC125  | -7.20192 |         |        |        | FALSE |
| hsa-miR-194*    | FKBP7    | -7.20147 |         |        |        | FALSE |
| hsa-let-7d*     | LY96     | -7.20063 |         |        |        | FALSE |
| hsa-miR-107     | OMD      | -7.2001  |         |        |        | FALSE |
| hsa-miR-200a    | P4HA3    | -7.19986 |         |        |        | FALSE |
| hsa-let-7g      | SCARF2   | -7.19751 |         |        |        | FALSE |
| hsa-miR-141     | RASL12   | -7.19721 |         |        |        | FALSE |
| hsa-miR-16-2*   | DACT1    | -7.19636 |         |        |        | FALSE |
| hsa-miR-378     | TMEM59L  | -7.19611 |         |        |        | FALSE |
| hsa-miR-29b     | MAGEL2   | -7.19555 |         |        |        | FALSE |
| hsa-miR-200b*   | TGFB3    | -7.1955  |         |        |        | FALSE |
| hsa-miR-150     | PEMT     | -7.19525 |         |        |        | FALSE |
| hsa-miR-128     | CYBRD1   | -7.19479 |         |        |        | FALSE |
| hsa-miR-324-5p  | HPGDS    | -7.19408 |         |        |        | FALSE |
| hsa-miR-125a-5p | DEPDC1   | -7.19136 |         |        |        | FALSE |
| hsa-miR-200b*   | CILP     | -7.18999 |         |        |        | FALSE |
| hsa-miR-127-3p  | HDHD3    | -7.18881 |         |        |        | FALSE |
| hsa-miR-337-3p  | IDO1     | -7.18813 |         |        |        | FALSE |
| hsa-miR-421     | ASPN     | -7.18778 |         |        |        | FALSE |
| hsa-miR-106b    | AHNAK2   | -7.18367 |         |        |        | FALSE |
| hsa-miR-577     | COL1A2   | -7.18352 |         |        |        | FALSE |
| hsa-miR-15b*    | DCN      | -7.18272 |         |        |        | FALSE |

|                 |          |          |         |        |        |       |
|-----------------|----------|----------|---------|--------|--------|-------|
| hsa-miR-326     | RPS3A    | -7.18256 |         |        |        | FALSE |
| hsa-miR-200a*   | GNG2     | -7.1825  |         |        |        | FALSE |
| hsa-miR-200b*   | ADAM12   | -7.18232 |         |        |        | FALSE |
| hsa-miR-31      | MCF2L    | -7.1823  |         |        |        | FALSE |
| hsa-miR-181a-2* | CD38     | -7.18016 |         |        |        | FALSE |
| hsa-miR-200a*   | IKBIP    | -7.17947 |         |        |        | FALSE |
| hsa-miR-652     | FAP      | -7.17871 |         |        |        | FALSE |
| hsa-miR-99a     | VDAC1    | -7.1781  |         |        |        | FALSE |
| hsa-miR-29c*    | CALD1    | -7.17767 |         |        |        | FALSE |
| hsa-miR-17      | CPA3     | -7.1769  | -0.1994 |        |        | FALSE |
| hsa-miR-200b*   | SEC23A   | -7.17634 |         |        |        | FALSE |
| hsa-miR-181c    | PKM      | -7.17597 |         |        |        | FALSE |
| hsa-miR-21*     | GPRASP1  | -7.17535 |         |        |        | FALSE |
| hsa-miR-421     | CYBRD1   | -7.17508 |         |        |        | FALSE |
| hsa-miR-7-1*    | COL6A3   | -7.17491 |         |        |        | FALSE |
| hsa-miR-17*     | IGFBP7   | -7.17402 |         |        |        | FALSE |
| hsa-miR-660     | SFRP2    | -7.17371 |         |        |        | FALSE |
| hsa-miR-29c*    | COL6A3   | -7.17356 |         |        |        | FALSE |
| hsa-miR-29c     | SPDL1    | -7.1731  | -0.9481 | -0.292 | 0.0108 | FALSE |
| hsa-miR-125a-5p | DLGAP5   | -7.17308 |         |        |        | FALSE |
| hsa-miR-15b*    | SYNE1    | -7.17277 |         |        |        | FALSE |
| hsa-miR-183     | CLEC2B   | -7.17263 |         |        |        | FALSE |
| hsa-miR-141*    | OLFML2B  | -7.16985 |         |        |        | FALSE |
| hsa-miR-502-3p  | PXDN     | -7.16944 |         |        |        | FALSE |
| hsa-miR-29c*    | MEX3A    | -7.16807 |         |        |        | FALSE |
| hsa-miR-651     | FILIP1L  | -7.16752 |         |        |        | FALSE |
| hsa-miR-500a*   | PMEPA1   | -7.16693 |         |        |        | FALSE |
| hsa-miR-20a     | CNN1     | -7.16625 | -0.9474 | -0.277 | 0.1658 | FALSE |
| hsa-miR-200a*   | KATNAL1  | -7.16542 |         |        |        | FALSE |
| hsa-miR-32      | AEBP1    | -7.16517 |         |        |        | FALSE |
| hsa-miR-149     | IL15RA   | -7.16441 |         |        |        | FALSE |
| hsa-miR-942     | SNED1    | -7.16385 |         |        |        | FALSE |
| hsa-miR-22      | NGDN     | -7.16343 |         |        |        | FALSE |
| hsa-miR-96      | COL6A3   | -7.16313 |         |        |        | FALSE |
| hsa-miR-502-3p  | ADAMTS12 | -7.16244 |         |        |        | FALSE |
| hsa-miR-1301    | MYH11    | -7.16135 |         |        |        | FALSE |
| hsa-miR-423-3p  | ECM2     | -7.16122 |         |        |        | FALSE |
| hsa-miR-18a     | TLR5     | -7.16059 |         |        |        | FALSE |
| hsa-miR-340*    | ARHGAP1  | -7.16053 |         |        |        | FALSE |
| hsa-miR-29c     | SUV39H2  | -7.15982 |         |        |        | FALSE |
| hsa-miR-142-5p  | ACVR2B   | -7.15973 |         |        |        | FALSE |
| hsa-miR-22*     | ACVR2B   | -7.15949 |         |        |        | FALSE |
| hsa-miR-200b    | QKI      | -7.15733 | -2.9556 | -0.426 | 0.2196 | FALSE |
| hsa-miR-651     | HMCN1    | -7.1566  |         |        |        | FALSE |
| hsa-miR-25      | CARD6    | -7.15597 | -0.1055 | -0.127 |        | FALSE |

|                |          |          |         |         |        |       |
|----------------|----------|----------|---------|---------|--------|-------|
| hsa-miR-29c*   | MFAP2    | -7.15509 |         |         |        | FALSE |
| hsa-miR-454    | COL6A3   | -7.154   | -0.3913 | -0.19   | 0.3342 | FALSE |
| hsa-miR-194    | PLAU     | -7.15384 |         |         |        | FALSE |
| hsa-miR-194*   | ANTXR1   | -7.15285 |         |         |        | FALSE |
| hsa-miR-532-3p | TGFB11   | -7.15275 |         |         |        | FALSE |
| hsa-miR-194*   | TIMP2    | -7.1527  |         |         |        | FALSE |
| hsa-miR-194*   | EHD2     | -7.15175 |         |         |        | FALSE |
| hsa-miR-369-5p | NFATC2IP | -7.15171 |         |         |        | FALSE |
| hsa-let-7f-1*  | SEC11C   | -7.15162 |         |         |        | FALSE |
| hsa-miR-1180   | LST1     | -7.1516  |         |         |        | FALSE |
| hsa-miR-223    | ZNF3     | -7.15131 |         |         |        | FALSE |
| hsa-miR-429    | COL6A3   | -7.15127 |         |         |        | FALSE |
| hsa-miR-19b    | SSC5D    | -7.15099 |         |         |        | FALSE |
| hsa-miR-200a*  | BNC2     | -7.14985 |         |         |        | FALSE |
| hsa-miR-200b*  | FILIP1L  | -7.14951 |         |         |        | FALSE |
| hsa-miR-339-3p | MMP2     | -7.14923 |         |         |        | FALSE |
| hsa-miR-149    | HNMT     | -7.1489  |         |         |        | FALSE |
| hsa-miR-16-2*  | MXRA8    | -7.14885 |         |         |        | FALSE |
| hsa-miR-192    | PODNL1   | -7.14876 |         |         |        | FALSE |
| hsa-miR-200b   | GPX8     | -7.14855 | -0.5007 |         |        | FALSE |
| hsa-miR-200b*  | LATS2    | -7.14693 |         |         |        | FALSE |
| hsa-miR-651    | ASPN     | -7.14656 |         |         |        | FALSE |
| hsa-miR-223    | P4HTM    | -7.14654 |         |         |        | FALSE |
| hsa-miR-200b*  | CTHRC1   | -7.14649 |         |         |        | FALSE |
| hsa-miR-18b    | OMD      | -7.14594 |         |         |        | FALSE |
| hsa-miR-183    | GMFG     | -7.14445 |         |         |        | FALSE |
| hsa-miR-423-3p | MMRN1    | -7.14234 |         |         |        | FALSE |
| hsa-miR-15a    | PGM5     | -7.14222 |         |         |        | FALSE |
| hsa-miR-15b    | FAM198B  | -7.14181 |         |         |        | FALSE |
| hsa-miR-33b    | SYNPO    | -7.14165 |         |         |        | FALSE |
| hsa-miR-141*   | EMP3     | -7.14118 |         |         |        | FALSE |
| hsa-miR-16-2*  | SPON1    | -7.14093 |         |         |        | FALSE |
| hsa-miR-27a*   | ZNF691   | -7.14083 |         |         |        | FALSE |
| hsa-miR-194    | PTK7     | -7.14018 |         |         |        | FALSE |
| hsa-miR-200c*  | KCNE4    | -7.13903 |         |         |        | FALSE |
| hsa-miR-577    | TPM2     | -7.13865 |         |         |        | FALSE |
| hsa-miR-369-5p | AP1G2    | -7.13774 |         |         |        | FALSE |
| hsa-miR-200b*  | NNMT     | -7.13773 |         |         |        | FALSE |
| hsa-miR-17*    | TNFSF12  | -7.13772 |         |         |        | FALSE |
| hsa-miR-18a*   | TXNIP    | -7.13772 |         |         |        | FALSE |
| hsa-miR-15a    | HEPH     | -7.1364  |         |         |        | FALSE |
| hsa-miR-22     | YPEL1    | -7.13603 |         |         |        | FALSE |
| hsa-miR-30e    | FN1      | -7.13533 |         |         |        | FALSE |
| hsa-miR-19b    | TK2      | -7.13495 | -0.8938 | -0.5286 |        | FALSE |
| hsa-miR-15a    | MYH11    | -7.13482 |         |         |        | FALSE |

|                 |          |          |         |        |        |       |
|-----------------|----------|----------|---------|--------|--------|-------|
| hsa-miR-589     | ZBTB22   | -7.1347  |         |        |        | FALSE |
| hsa-miR-30e*    | RAB31    | -7.13455 |         |        |        | FALSE |
| hsa-miR-210     | FBLN5    | -7.13426 |         |        |        | FALSE |
| hsa-miR-3615    | LMOD1    | -7.13424 |         |        |        | FALSE |
| hsa-miR-532-5p  | FAP      | -7.13395 |         |        |        | FALSE |
| hsa-miR-942     | PRELP    | -7.13391 |         |        |        | FALSE |
| hsa-miR-223*    | GPRASP1  | -7.13346 |         |        |        | FALSE |
| hsa-miR-33a     | NEXN     | -7.13293 |         |        |        | FALSE |
| hsa-miR-25      | OMD      | -7.1324  |         |        |        | FALSE |
| hsa-let-7d*     | YPEL5    | -7.13197 |         |        |        | FALSE |
| hsa-miR-376c    | TDRD7    | -7.13115 |         |        |        | FALSE |
| hsa-miR-33a*    | IGFBP7   | -7.13047 |         |        |        | FALSE |
| hsa-miR-22      | EXOSC5   | -7.12926 |         |        |        | FALSE |
| hsa-miR-629     | LMOD1    | -7.12825 |         |        |        | FALSE |
| hsa-miR-29b     | TMEFF1   | -7.12794 | -1.2416 | -0.322 | 0.0187 | FALSE |
| hsa-miR-30d*    | PCOLCE   | -7.12611 |         |        |        | FALSE |
| hsa-miR-193a-3p | ABCA9    | -7.12561 |         |        |        | FALSE |
| hsa-miR-32      | ADAMTS12 | -7.12543 |         |        |        | FALSE |
| hsa-miR-32      | P4HA3    | -7.12524 |         |        |        | FALSE |
| hsa-miR-629     | PBXIP1   | -7.12506 |         |        |        | FALSE |
| hsa-miR-7-1*    | CYS1     | -7.12495 |         |        |        | FALSE |
| hsa-miR-26a     | EIF2S1   | -7.12485 | -0.3861 | -0.728 | 0.7886 | FALSE |
| hsa-miR-200c    | EFEMP2   | -7.12483 |         |        |        | FALSE |
| hsa-miR-423-3p  | TGFB11   | -7.12473 |         |        |        | FALSE |
| hsa-miR-24-2*   | PCM1     | -7.12461 |         |        |        | FALSE |
| hsa-miR-577     | FAP      | -7.12445 |         |        |        | FALSE |
| hsa-miR-200a*   | LIX1L    | -7.12237 |         |        |        | FALSE |
| hsa-miR-577     | EHD2     | -7.12231 |         |        |        | FALSE |
| hsa-miR-200a*   | DACT3    | -7.12053 |         |        |        | FALSE |
| hsa-miR-200b    | TUBB6    | -7.11981 |         |        |        | FALSE |
| hsa-miR-130b*   | C3       | -7.11627 |         |        |        | FALSE |
| hsa-miR-148b    | ARSI     | -7.11577 |         |        |        | FALSE |
| hsa-miR-16-2*   | ASPN     | -7.11525 |         |        |        | FALSE |
| hsa-miR-192*    | FRMD6    | -7.11497 |         |        |        | FALSE |
| hsa-miR-186     | DACT3    | -7.11453 |         |        |        | FALSE |
| hsa-miR-21*     | ZFP14    | -7.11453 |         |        |        | FALSE |
| hsa-miR-194     | PRRX1    | -7.11327 |         |        |        | FALSE |
| hsa-miR-92a     | FBXL5    | -7.11298 |         |        |        | FALSE |
| hsa-miR-191     | FBN1     | -7.11258 |         |        |        | FALSE |
| hsa-miR-106b    | SERINC1  | -7.11232 | -0.1564 | -0.074 |        | FALSE |
| hsa-miR-20a*    | LMOD1    | -7.11076 |         |        |        | FALSE |
| hsa-miR-32      | LUM      | -7.11064 |         |        |        | FALSE |
| hsa-let-7g*     | MYH11    | -7.11062 |         |        |        | FALSE |
| hsa-miR-106b    | DCN      | -7.11054 |         |        |        | FALSE |
| hsa-miR-381     | FUK      | -7.1105  |         |        |        | FALSE |

|                 |          |          |         |        |       |
|-----------------|----------|----------|---------|--------|-------|
| hsa-miR-150     | RARS2    | -7.11038 |         |        | FALSE |
| hsa-miR-200a    | SNAI2    | -7.11017 |         |        | FALSE |
| hsa-miR-500b    | ASPN     | -7.10952 |         |        | FALSE |
| hsa-miR-106b    | ITGBL1   | -7.10805 |         | -0.163 | FALSE |
| hsa-miR-18a     | UBL3     | -7.10693 | -0.2421 |        | FALSE |
| hsa-miR-32      | TSHZ3    | -7.1052  |         |        | FALSE |
| hsa-miR-30a     | TROAP    | -7.10487 |         |        | FALSE |
| hsa-miR-30a*    | CDKN3    | -7.10462 |         |        | FALSE |
| hsa-miR-379     | C6orf136 | -7.10382 |         |        | FALSE |
| hsa-miR-192*    | DCN      | -7.10376 |         |        | FALSE |
| hsa-miR-363     | C19orf33 | -7.10313 |         |        | FALSE |
| hsa-miR-92a-1*  | CERCAM   | -7.10291 |         |        | FALSE |
| hsa-miR-339-3p  | PTRF     | -7.10225 |         |        | FALSE |
| hsa-miR-29c     | TUBA1B   | -7.10213 |         |        | FALSE |
| hsa-miR-141     | ECM2     | -7.10203 | -0.1621 |        | FALSE |
| hsa-miR-200c*   | P4HA3    | -7.10155 |         |        | FALSE |
| hsa-miR-30a     | CDKN3    | -7.10154 |         |        | FALSE |
| hsa-miR-194     | COL10A1  | -7.10103 |         |        | FALSE |
| hsa-miR-141*    | COL5A1   | -7.10059 |         |        | FALSE |
| hsa-miR-652     | COL10A1  | -7.10052 |         |        | FALSE |
| hsa-miR-186     | ACTG2    | -7.10012 |         |        | FALSE |
| hsa-miR-96      | CXCL12   | -7.09921 |         |        | FALSE |
| hsa-miR-146b-3p | IP6K2    | -7.0991  |         |        | FALSE |
| hsa-miR-339-5p  | RCAN2    | -7.09814 |         |        | FALSE |
| hsa-miR-148b    | ZNF469   | -7.09593 |         |        | FALSE |
| hsa-miR-141*    | ANTXR1   | -7.09584 |         |        | FALSE |
| hsa-miR-17      | ITGBL1   | -7.09516 |         | -0.163 | FALSE |
| hsa-miR-21*     | CRY2     | -7.09434 |         |        | FALSE |
| hsa-miR-200b    | HTRA3    | -7.09385 |         |        | FALSE |
| hsa-miR-200a*   | NNMT     | -7.09347 |         |        | FALSE |
| hsa-miR-22*     | MCM9     | -7.09322 |         |        | FALSE |
| hsa-miR-103a-2* | PRELP    | -7.09311 |         |        | FALSE |
| hsa-miR-200c*   | RBMS3    | -7.09274 |         |        | FALSE |
| hsa-miR-19b-1*  | IL1R1    | -7.09263 |         |        | FALSE |
| hsa-miR-328     | VASP     | -7.09153 |         |        | FALSE |
| hsa-miR-629*    | CTIF     | -7.09008 |         |        | FALSE |
| hsa-miR-194     | TSHZ3    | -7.09008 |         |        | FALSE |
| hsa-miR-454     | GPR124   | -7.08957 |         |        | FALSE |
| hsa-miR-660     | ASPN     | -7.08948 |         |        | FALSE |
| hsa-miR-590-5p  | PPP1R12B | -7.0884  |         |        | FALSE |
| hsa-miR-19b-1*  | ECM2     | -7.08691 |         |        | FALSE |
| hsa-miR-15b*    | LMOD1    | -7.08622 |         |        | FALSE |
| hsa-miR-15b     | PODN     | -7.08536 |         | 0.0921 | FALSE |
| hsa-miR-200c    | ECM2     | -7.08493 | -0.1048 |        | FALSE |
| hsa-miR-429     | TMEM55A  | -7.08408 | -0.6017 |        | FALSE |

|                 |          |          |         |        |        |       |
|-----------------|----------|----------|---------|--------|--------|-------|
| hsa-miR-200b*   | HEG1     | -7.08406 |         |        |        | FALSE |
| hsa-miR-15b*    | IGFBP7   | -7.08394 |         |        |        | FALSE |
| hsa-miR-577     | PTRF     | -7.08344 |         |        |        | FALSE |
| hsa-miR-200b*   | CNN1     | -7.08333 |         |        |        | FALSE |
| hsa-miR-502-3p  | CALD1    | -7.08324 |         |        |        | FALSE |
| hsa-miR-381     | HDHD3    | -7.08318 |         |        |        | FALSE |
| hsa-miR-651     | LMOD1    | -7.08176 |         |        |        | FALSE |
| hsa-miR-30a     | LMNB1    | -7.0815  |         |        |        | FALSE |
| hsa-miR-29c     | DEPDC1   | -7.08107 | -0.9856 |        |        | FALSE |
| hsa-miR-337-3p  | LAG3     | -7.08045 |         |        |        | FALSE |
| hsa-miR-26b*    | MYH11    | -7.07983 |         |        |        | FALSE |
| hsa-miR-411     | NFATC2IP | -7.07962 |         |        |        | FALSE |
| hsa-miR-181c    | REEP4    | -7.07872 |         |        |        | FALSE |
| hsa-miR-423-3p  | SERPING1 | -7.07871 |         |        |        | FALSE |
| hsa-miR-92a-1*  | SMPD1    | -7.07844 |         |        |        | FALSE |
| hsa-miR-92a     | VAMP8    | -7.07728 |         |        |        | FALSE |
| hsa-miR-15a     | PLN      | -7.07621 |         |        |        | FALSE |
| hsa-miR-21      | RMND5A   | -7.07613 | -0.4307 | -0.409 | 0.49   | FALSE |
| hsa-miR-19b-1*  | OLFML1   | -7.07539 |         |        |        | FALSE |
| hsa-miR-497     | DLGAP5   | -7.07511 |         |        |        | FALSE |
| hsa-miR-103a-2* | SSC5D    | -7.07439 |         |        |        | FALSE |
| hsa-miR-145*    | FAM96A   | -7.07424 |         |        |        | FALSE |
| hsa-miR-3065-5p | FBN1     | -7.07316 |         |        |        | FALSE |
| hsa-miR-200a*   | HTRA1    | -7.0715  |         |        |        | FALSE |
| hsa-miR-149     | TBXAS1   | -7.07117 |         |        |        | FALSE |
| hsa-miR-222*    | NRIP2    | -7.07078 |         |        |        | FALSE |
| hsa-miR-191*    | DACT3    | -7.06857 |         |        |        | FALSE |
| hsa-miR-200b*   | FHL3     | -7.0683  |         |        |        | FALSE |
| hsa-miR-7-1*    | FILIP1L  | -7.0676  |         |        |        | FALSE |
| hsa-miR-340     | JUNB     | -7.06738 |         |        |        | FALSE |
| hsa-miR-141*    | MRC2     | -7.06584 |         |        |        | FALSE |
| hsa-miR-200a*   | GGT5     | -7.06576 |         |        |        | FALSE |
| hsa-miR-144*    | CILP     | -7.06454 |         |        |        | FALSE |
| hsa-miR-1226    | CYBRD1   | -7.06435 |         |        |        | FALSE |
| hsa-miR-30a*    | AURKB    | -7.06274 |         |        |        | FALSE |
| hsa-miR-93      | DCN      | -7.06263 |         |        |        | FALSE |
| hsa-miR-194*    | PTK7     | -7.06252 |         |        |        | FALSE |
| hsa-miR-30d*    | MSRB3    | -7.06249 |         |        |        | FALSE |
| hsa-miR-3127-5p | ECM2     | -7.06241 |         |        |        | FALSE |
| hsa-miR-200c    | CFL2     | -7.06144 | -1.3939 | -0.708 | 0.2067 | FALSE |
| hsa-miR-152     | GBA2     | -7.06101 |         |        |        | FALSE |
| hsa-miR-92a-1*  | MYL9     | -7.06022 |         |        |        | FALSE |
| hsa-miR-423-3p  | TPSB2    | -7.05986 |         |        |        | FALSE |
| hsa-miR-191*    | MYLK     | -7.05967 |         |        |        | FALSE |
| hsa-miR-17      | CREBL2   | -7.05853 |         |        |        | FALSE |

|                 |          |          |         |         |        |       |
|-----------------|----------|----------|---------|---------|--------|-------|
| hsa-miR-128     | DPYD     | -7.05849 |         |         |        | FALSE |
| hsa-miR-301a    | MYOF     | -7.05759 |         |         |        | FALSE |
| hsa-miR-20a     | ASPN     | -7.05707 | -0.1069 |         |        | FALSE |
| hsa-miR-30d     | TPM4     | -7.05647 |         |         |        | FALSE |
| hsa-miR-30d     | CEP55    | -7.05587 |         |         |        | FALSE |
| hsa-miR-29c     | MELK     | -7.05564 |         |         |        | FALSE |
| hsa-miR-19a     | CACNA1C  | -7.05535 | -0.1856 | -0.5722 | 0.9686 | FALSE |
| hsa-miR-92b     | FCGRT    | -7.0547  |         |         |        | FALSE |
| hsa-miR-2355-3p | C1QTNF7  | -7.05469 |         |         |        | FALSE |
| hsa-miR-30e*    | ADAM12   | -7.05391 |         |         |        | FALSE |
| hsa-miR-577     | FSTL1    | -7.05368 |         |         |        | FALSE |
| hsa-miR-4326    | EMCN     | -7.05232 |         |         |        | FALSE |
| hsa-miR-425     | RBMS3    | -7.05202 |         |         |        | FALSE |
| hsa-miR-149     | MLKL     | -7.0518  |         |         |        | FALSE |
| hsa-miR-33b     | BMPR2    | -7.05128 |         | -0.1543 |        | FALSE |
| hsa-miR-194*    | COL6A3   | -7.04998 |         |         |        | FALSE |
| hsa-miR-200b*   | ITGA5    | -7.04997 |         |         |        | FALSE |
| hsa-miR-16-2*   | JAM3     | -7.04911 |         |         |        | FALSE |
| hsa-miR-424     | CBX7     | -7.04715 |         |         |        | FALSE |
| hsa-miR-200c*   | EFEMP2   | -7.04647 |         |         |        | FALSE |
| hsa-miR-301a    | VWA5A    | -7.04582 |         |         |        | FALSE |
| hsa-miR-16      | MRVI1    | -7.04544 |         |         |        | FALSE |
| hsa-miR-30e     | PVR      | -7.04397 |         |         |        | FALSE |
| hsa-miR-432     | ITGB7    | -7.04391 |         |         |        | FALSE |
| hsa-miR-188-5p  | SPARCL1  | -7.04307 |         |         |        | FALSE |
| hsa-miR-671-5p  | PGM5     | -7.04289 |         |         |        | FALSE |
| hsa-miR-451     | CSDC2    | -7.04203 |         |         |        | FALSE |
| hsa-miR-92a-1*  | PBXIP1   | -7.04119 |         |         |        | FALSE |
| hsa-miR-7-1*    | MRVI1    | -7.04024 |         |         |        | FALSE |
| hsa-miR-616*    | SHROOM4  | -7.04021 |         |         |        | FALSE |
| hsa-miR-16      | PRICKLE1 | -7.04    | -0.5694 |         |        | FALSE |
| hsa-miR-7-1*    | FBN1     | -7.03922 |         |         |        | FALSE |
| hsa-miR-26a     | TSR1     | -7.03894 |         |         |        | FALSE |
| hsa-miR-429     | TSHZ3    | -7.03865 |         |         |        | FALSE |
| hsa-miR-200a    | GREM1    | -7.03742 |         |         |        | FALSE |
| hsa-miR-3127-5p | LDB2     | -7.03594 |         |         |        | FALSE |
| hsa-miR-24      | VRK3     | -7.03549 |         |         |        | FALSE |
| hsa-miR-22*     | ZFP62    | -7.03535 |         |         |        | FALSE |
| hsa-miR-17      | KIAA0513 | -7.03511 | -0.2562 | -0.535  | 0.534  | FALSE |
| hsa-miR-877     | OMD      | -7.03436 |         |         |        | FALSE |
| hsa-miR-301a    | KCND3    | -7.03416 |         |         |        | FALSE |
| hsa-miR-203     | CEP170   | -7.03412 |         |         |        | FALSE |
| hsa-miR-429     | KCTD12   | -7.03351 | -0.1996 | -0.382  |        | FALSE |
| hsa-miR-454     | HEPH     | -7.03329 |         |         |        | FALSE |
| hsa-miR-760     | LDLRAD4  | -7.03263 |         |         |        | FALSE |



|                 |          |          |         |        |       |
|-----------------|----------|----------|---------|--------|-------|
| hsa-miR-191*    | CYS1     | -7.03252 |         |        | FALSE |
| hsa-miR-451     | CILP     | -7.03225 |         |        | FALSE |
| hsa-miR-192*    | PODNL1   | -7.03222 |         |        | FALSE |
| hsa-miR-30a     | KIF4A    | -7.03205 |         |        | FALSE |
| hsa-miR-16-2*   | ANTXR2   | -7.03188 |         |        | FALSE |
| hsa-miR-15b     | NBL1     | -7.03106 |         |        | FALSE |
| hsa-miR-200a    | JAM3     | -7.03088 | -0.117  | 0.109  | FALSE |
| hsa-miR-651     | PMEPA1   | -7.02978 |         |        | FALSE |
| hsa-miR-29c     | EIF4A1   | -7.02943 |         |        | FALSE |
| hsa-miR-22      | HMG2     | -7.02933 |         |        | FALSE |
| hsa-miR-30b*    | IGFBP7   | -7.02869 |         |        | FALSE |
| hsa-miR-3677-3p | GTF2IRD2 | -7.02791 |         |        | FALSE |
| hsa-miR-30a     | CENPW    | -7.02761 |         |        | FALSE |
| hsa-miR-200a*   | LAMA4    | -7.02753 |         |        | FALSE |
| hsa-miR-20a     | PLN      | -7.02745 |         |        | FALSE |
| hsa-miR-194     | AEBP1    | -7.02606 |         |        | FALSE |
| hsa-miR-20a*    | DAB2     | -7.02598 |         |        | FALSE |
| hsa-miR-17      | A2M      | -7.02587 |         |        | FALSE |
| hsa-miR-181c*   | CD68     | -7.02585 |         |        | FALSE |
| hsa-miR-125a-3p | HNMT     | -7.02543 |         |        | FALSE |
| hsa-miR-18a     | TMC4     | -7.02472 |         |        | FALSE |
| hsa-miR-17      | MGP      | -7.02456 |         |        | FALSE |
| hsa-miR-374b*   | KIAA0513 | -7.0236  |         |        | FALSE |
| hsa-miR-200a    | SULF1    | -7.02326 |         |        | FALSE |
| hsa-miR-92a     | LST1     | -7.02298 |         |        | FALSE |
| hsa-miR-20b     | TGFB1    | -7.02139 |         |        | FALSE |
| hsa-miR-215     | MMP2     | -7.0212  |         |        | FALSE |
| hsa-miR-106b    | RNASEL   | -7.02088 | -1.1659 | -0.451 | FALSE |
| hsa-miR-92a     | LAT2     | -7.02016 |         |        | FALSE |
| hsa-miR-411     | RASSF7   | -7.01966 |         |        | FALSE |
| hsa-miR-20a*    | NEXN     | -7.01918 |         |        | FALSE |
| hsa-miR-92a-1*  | CNN1     | -7.01902 |         |        | FALSE |
| hsa-miR-495     | HSBP1L1  | -7.01863 |         |        | FALSE |
| hsa-miR-432     | FAM195A  | -7.01862 |         |        | FALSE |
| hsa-miR-629     | SGCA     | -7.01744 |         |        | FALSE |
| hsa-miR-660     | COL10A1  | -7.01708 |         |        | FALSE |
| hsa-miR-93*     | GPR124   | -7.01706 |         |        | FALSE |
| hsa-miR-93*     | SPARCL1  | -7.01661 |         |        | FALSE |
| hsa-miR-19b-1*  | PRELP    | -7.01644 |         |        | FALSE |
| hsa-miR-22      | ZNF397   | -7.01614 |         |        | FALSE |
| hsa-miR-1       | SPAG5    | -7.01472 |         |        | FALSE |
| hsa-miR-200a    | AEBP1    | -7.0147  | -0.103  | 0.1667 | FALSE |
| hsa-miR-484     | CNN1     | -7.01325 |         |        | FALSE |
| hsa-miR-200c*   | CNN1     | -7.01267 |         |        | FALSE |
| hsa-miR-96      | KCTD12   | -7.01224 |         |        | FALSE |

|                 |          |          |         |        |        |       |
|-----------------|----------|----------|---------|--------|--------|-------|
| hsa-miR-16-2*   | RANBP3L  | -7.01219 |         |        |        | FALSE |
| hsa-miR-30d*    | C1S      | -7.01206 |         |        |        | FALSE |
| hsa-miR-17      | RAI2     | -7.01135 |         |        |        | FALSE |
| hsa-miR-30e*    | COL1A1   | -7.01127 |         |        |        | FALSE |
| hsa-miR-146b-5p | ZNF446   | -7.01006 |         |        |        | FALSE |
| hsa-miR-18a     | LMOD1    | -7.00923 |         |        |        | FALSE |
| hsa-miR-30e*    | HTRA3    | -7.00908 |         |        |        | FALSE |
| hsa-miR-3170    | MS4A2    | -7.00894 |         |        |        | FALSE |
| hsa-miR-194*    | ZFPM2    | -7.0087  |         |        |        | FALSE |
| hsa-miR-192*    | AEBP1    | -7.00844 |         |        |        | FALSE |
| hsa-miR-200c    | GAS1     | -7.00837 |         |        |        | FALSE |
| hsa-miR-141*    | FERMT2   | -7.00813 |         |        |        | FALSE |
| hsa-miR-96      | GIMAP4   | -7.00798 |         |        |        | FALSE |
| hsa-miR-18a*    | HPGDS    | -7.00733 |         |        |        | FALSE |
| hsa-miR-7-1*    | JAM3     | -7.00681 |         |        |        | FALSE |
| hsa-miR-576-5p  | LMOD1    | -7.00605 |         |        |        | FALSE |
| hsa-miR-186     | ASPN     | -7.00501 |         |        |        | FALSE |
| hsa-miR-32      | ANTXR2   | -7.0049  |         |        |        | FALSE |
| hsa-miR-223     | ZFP62    | -7.00469 |         |        |        | FALSE |
| hsa-miR-3614-5p | CERK     | -7.00404 |         |        |        | FALSE |
| hsa-miR-24-2*   | GPRASP1  | -7.00326 |         |        |        | FALSE |
| hsa-miR-1296    | CFB      | -7.00263 |         |        |        | FALSE |
| hsa-miR-7-1*    | PLN      | -7.0018  |         |        |        | FALSE |
| hsa-miR-93      | DPYD     | -7.0014  | -1.2387 | -0.329 |        | FALSE |
| hsa-miR-182     | NEXN     | -7.00034 |         |        |        | FALSE |
| hsa-miR-191*    | CNN1     | -6.99901 |         |        |        | FALSE |
| hsa-miR-125a-5p | KPNA2    | -6.9985  |         |        |        | FALSE |
| hsa-miR-182     | EMP3     | -6.99809 |         |        |        | FALSE |
| hsa-miR-152     | WDR59    | -6.99779 | -1.2571 | -0.34  | 0.0151 | FALSE |
| hsa-let-7e      | CBR3     | -6.99746 |         |        |        | FALSE |
| hsa-miR-20a*    | IL16     | -6.99685 |         |        |        | FALSE |
| hsa-miR-590-3p  | TNS1     | -6.99672 |         |        |        | FALSE |
| hsa-miR-31      | ZNF652   | -6.9957  |         |        |        | FALSE |
| hsa-miR-339-3p  | ZFPM2    | -6.99449 |         |        |        | FALSE |
| hsa-miR-15b     | SFRP4    | -6.99444 |         |        |        | FALSE |
| hsa-miR-7-1*    | PODNL1   | -6.9944  |         |        |        | FALSE |
| hsa-miR-210     | RGS5     | -6.99436 |         | -0.046 |        | FALSE |
| hsa-miR-92a     | ATP6V0E1 | -6.99386 |         |        |        | FALSE |
| hsa-miR-106a    | AKAP13   | -6.99355 | -0.1579 | -0.172 | 0.953  | FALSE |
| hsa-miR-651     | AEBP1    | -6.9933  |         |        |        | FALSE |
| hsa-miR-223     | KLHDC2   | -6.99302 |         |        |        | FALSE |
| hsa-miR-143     | ANKZF1   | -6.99262 |         |        |        | FALSE |
| hsa-miR-1307    | LMOD1    | -6.99071 |         |        |        | FALSE |
| hsa-miR-125a-5p | ORC1     | -6.99003 |         |        |        | FALSE |
| hsa-miR-200b    | PDCD1LG2 | -6.9898  |         |        |        | FALSE |

|                 |          |          |         |        |        |       |
|-----------------|----------|----------|---------|--------|--------|-------|
| hsa-miR-17      | TLR5     | -6.98921 |         |        |        | FALSE |
| hsa-miR-30d*    | BGN      | -6.98874 |         |        |        | FALSE |
| hsa-miR-15b     | CRY2     | -6.98869 |         | -0.07  | 0.0715 | FALSE |
| hsa-miR-192*    | GLT8D2   | -6.98859 |         |        |        | FALSE |
| hsa-miR-200a*   | VIM      | -6.98831 |         |        |        | FALSE |
| hsa-miR-22      | RPL22    | -6.98829 |         |        |        | FALSE |
| hsa-miR-331-5p  | TNS1     | -6.98754 |         |        |        | FALSE |
| hsa-miR-15b     | ITGBL1   | -6.98733 | -0.1555 | -0.13  | 0.085  | FALSE |
| hsa-miR-93*     | MVP      | -6.98721 |         |        |        | FALSE |
| hsa-miR-200a*   | NID2     | -6.98693 |         |        |        | FALSE |
| hsa-miR-30a     | CDCA8    | -6.98643 | -0.348  | -0.135 | 0.3596 | FALSE |
| hsa-miR-210     | GPR133   | -6.98635 |         |        |        | FALSE |
| hsa-miR-3615    | PLN      | -6.98587 |         |        |        | FALSE |
| hsa-miR-1       | ARHGEF39 | -6.9853  |         | -0.019 |        | FALSE |
| hsa-miR-18b     | COLEC12  | -6.98496 |         |        |        | FALSE |
| hsa-miR-21      | NDRG2    | -6.98445 |         |        |        | FALSE |
| hsa-miR-2355-5p | NRIP2    | -6.98351 |         |        |        | FALSE |
| hsa-miR-22*     | FAM161B  | -6.9834  |         |        |        | FALSE |
| hsa-miR-542-5p  | CD2AP    | -6.98336 |         |        |        | FALSE |
| hsa-miR-26b     | KIF26B   | -6.98335 |         |        |        | FALSE |
| hsa-miR-30a*    | CENPE    | -6.98216 |         |        |        | FALSE |
| hsa-miR-22*     | ELF2     | -6.98163 |         |        |        | FALSE |
| hsa-miR-194*    | CLEC11A  | -6.98019 |         |        |        | FALSE |
| hsa-miR-223     | ZNF396   | -6.98017 |         |        |        | FALSE |
| hsa-miR-186     | ACTA2    | -6.97992 |         |        |        | FALSE |
| hsa-miR-200b*   | PMP22    | -6.97968 |         |        |        | FALSE |
| hsa-miR-181c*   | PDZK1IP1 | -6.97916 |         |        |        | FALSE |
| hsa-miR-200c    | JAM2     | -6.97773 |         |        |        | FALSE |
| hsa-miR-148b    | MSRB3    | -6.97712 |         |        |        | FALSE |
| hsa-miR-33a*    | SSPN     | -6.97592 |         |        |        | FALSE |
| hsa-miR-1301    | MMP28    | -6.97551 |         |        |        | FALSE |
| hsa-miR-194     | PCOLCE   | -6.97466 |         |        |        | FALSE |
| hsa-miR-141     | GAS1     | -6.97408 | -0.2644 | -0.08  | 0.1666 | FALSE |
| hsa-miR-758     | PSD4     | -6.97391 |         |        |        | FALSE |
| hsa-miR-183     | RRAS     | -6.97337 |         |        |        | FALSE |
| hsa-miR-30c     | COL1A2   | -6.97321 | -0.6922 |        |        | FALSE |
| hsa-miR-655     | PRKCD    | -6.973   |         |        |        | FALSE |
| hsa-miR-107     | FIBIN    | -6.97278 |         |        |        | FALSE |
| hsa-miR-532-5p  | TAGLN    | -6.97275 |         |        |        | FALSE |
| hsa-miR-200a*   | TIMP2    | -6.97261 |         |        |        | FALSE |
| hsa-miR-423-3p  | GLT8D2   | -6.97187 |         |        |        | FALSE |
| hsa-miR-340*    | LRRFIP1  | -6.97097 |         |        |        | FALSE |
| hsa-miR-103a-2* | MYH11    | -6.97009 |         |        |        | FALSE |
| hsa-miR-194     | SERPINE1 | -6.96908 |         |        |        | FALSE |
| hsa-miR-337-3p  | PSME1    | -6.96867 |         |        |        | FALSE |

|                 |          |          |         |         |        |       |
|-----------------|----------|----------|---------|---------|--------|-------|
| hsa-miR-200b*   | THBS1    | -6.96821 |         |         |        | FALSE |
| hsa-miR-331-5p  | SSC5D    | -6.96721 |         |         |        | FALSE |
| hsa-miR-99a     | GRPEL1   | -6.96715 |         |         |        | FALSE |
| hsa-miR-205     | RNF157   | -6.9671  | -0.2482 | -0.0917 |        | FALSE |
| hsa-miR-194     | POSTN    | -6.96693 |         |         |        | FALSE |
| hsa-miR-25      | HSPB8    | -6.96651 |         |         |        | FALSE |
| hsa-miR-500a*   | MMP28    | -6.96575 |         |         |        | FALSE |
| hsa-miR-1       | FGFR1OP  | -6.96543 |         |         |        | FALSE |
| hsa-miR-200c*   | TIMP2    | -6.96525 |         |         |        | FALSE |
| hsa-miR-194     | HTRA1    | -6.96501 |         |         |        | FALSE |
| hsa-miR-30b*    | HTRA3    | -6.96481 |         |         |        | FALSE |
| hsa-miR-186     | MS4A2    | -6.96446 |         |         |        | FALSE |
| hsa-miR-1301    | PTGER3   | -6.964   |         |         |        | FALSE |
| hsa-miR-200c*   | COL6A3   | -6.96371 |         |         |        | FALSE |
| hsa-miR-937     | FAM172A  | -6.96348 |         |         |        | FALSE |
| hsa-miR-200a*   | C1QTNF6  | -6.96344 |         |         |        | FALSE |
| hsa-miR-16      | LAMA2    | -6.96328 |         |         |        | FALSE |
| hsa-miR-192*    | SNAI2    | -6.96288 |         |         |        | FALSE |
| hsa-miR-501-3p  | ASPN     | -6.96257 |         |         |        | FALSE |
| hsa-miR-194     | LUM      | -6.96251 |         |         |        | FALSE |
| hsa-miR-30d     | TUBB6    | -6.96215 |         |         |        | FALSE |
| hsa-miR-19a     | SNED1    | -6.96201 |         |         |        | FALSE |
| hsa-miR-200b*   | CRTAP    | -6.9618  |         |         |        | FALSE |
| hsa-miR-30c     | P4HA3    | -6.9615  | -0.1725 |         |        | FALSE |
| hsa-miR-629     | C7       | -6.96141 |         |         |        | FALSE |
| hsa-miR-130b    | CALCOCO1 | -6.96099 |         |         |        | FALSE |
| hsa-miR-1307    | CYBRD1   | -6.96043 |         |         |        | FALSE |
| hsa-miR-379     | GAS8     | -6.96035 |         |         |        | FALSE |
| hsa-miR-125a-5p | DEPDC1B  | -6.96012 |         |         |        | FALSE |
| hsa-miR-629*    | CACNA1C  | -6.96003 |         |         |        | FALSE |
| hsa-miR-33a     | BMPR2    | -6.9598  |         | -0.1543 |        | FALSE |
| hsa-miR-93*     | ACTA2    | -6.9597  |         |         |        | FALSE |
| hsa-miR-200a    | ITGA5    | -6.95942 |         |         |        | FALSE |
| hsa-miR-194*    | MRC2     | -6.95854 |         |         |        | FALSE |
| hsa-miR-200b*   | F2R      | -6.95832 |         |         |        | FALSE |
| hsa-miR-200b    | KDELC1   | -6.95732 | -1.2499 | -0.486  | 0.2071 | FALSE |
| hsa-miR-16-2*   | OMD      | -6.95725 |         |         |        | FALSE |
| hsa-miR-191*    | BGN      | -6.95628 |         |         |        | FALSE |
| hsa-miR-200a*   | CMTM3    | -6.95619 |         |         |        | FALSE |
| hsa-miR-616*    | MYH11    | -6.95583 |         |         |        | FALSE |
| hsa-miR-590-5p  | ARHGEF12 | -6.95571 | -1.0204 | -0.282  | 0.4522 | FALSE |
| hsa-miR-502-3p  | POSTN    | -6.95506 |         |         |        | FALSE |
| hsa-miR-186     | NOTCH3   | -6.95409 |         |         |        | FALSE |
| hsa-miR-210     | LMOD1    | -6.95283 |         |         |        | FALSE |
| hsa-miR-30b*    | CALD1    | -6.95256 |         |         |        | FALSE |

|                 |          |          |         |        |        |       |
|-----------------|----------|----------|---------|--------|--------|-------|
| hsa-miR-30c     | INHBA    | -6.95229 |         |        |        | FALSE |
| hsa-miR-141     | DCHS1    | -6.95167 |         |        |        | FALSE |
| hsa-miR-144*    | HTRA3    | -6.95149 |         |        |        | FALSE |
| hsa-miR-19a     | MRVI1    | -6.94947 |         |        |        | FALSE |
| hsa-miR-1307    | CBX7     | -6.94931 |         |        |        | FALSE |
| hsa-miR-15b     | HTRA1    | -6.94921 |         |        |        | FALSE |
| hsa-miR-411     | AMT      | -6.94895 |         |        |        | FALSE |
| hsa-miR-200b    | SULF1    | -6.94865 | -1.8034 | -0.646 | 0.2212 | FALSE |
| hsa-miR-92a     | CBX7     | -6.94823 |         |        |        | FALSE |
| hsa-miR-200a*   | CTHRC1   | -6.9481  |         |        |        | FALSE |
| hsa-miR-107     | PMEPA1   | -6.94804 |         |        |        | FALSE |
| hsa-miR-30c-2*  | RRM2     | -6.94755 |         |        |        | FALSE |
| hsa-miR-183     | HLA-DPB1 | -6.94721 |         |        |        | FALSE |
| hsa-miR-93      | EHD2     | -6.94717 |         |        |        | FALSE |
| hsa-miR-29b-2*  | MFAP2    | -6.94654 |         |        |        | FALSE |
| hsa-miR-194*    | CNRIP1   | -6.94648 |         |        |        | FALSE |
| hsa-miR-577     | MYL9     | -6.94605 |         |        |        | FALSE |
| hsa-miR-200b*   | JAM2     | -6.94536 |         |        |        | FALSE |
| hsa-miR-423-3p  | RASL12   | -6.94498 |         |        |        | FALSE |
| hsa-miR-181c    | PMM2     | -6.94365 |         |        |        | FALSE |
| hsa-miR-192     | TSHZ3    | -6.94349 |         |        |        | FALSE |
| hsa-miR-651     | LHFP     | -6.94339 |         |        |        | FALSE |
| hsa-miR-193b*   | PDE7B    | -6.94323 |         |        |        | FALSE |
| hsa-miR-29b-2*  | KDELC1   | -6.94321 |         |        |        | FALSE |
| hsa-miR-32      | COL6A2   | -6.94291 |         |        |        | FALSE |
| hsa-miR-330-5p  | RPS6     | -6.94275 |         |        |        | FALSE |
| hsa-miR-592     | FSTL3    | -6.94271 |         |        |        | FALSE |
| hsa-miR-200a*   | CDH11    | -6.94182 |         |        |        | FALSE |
| hsa-miR-19a     | ZBTB47   | -6.94117 | -0.2702 | -0.11  | 0.6129 | FALSE |
| hsa-miR-409-3p  | ULK3     | -6.94109 |         |        |        | FALSE |
| hsa-miR-191     | PLSCR4   | -6.94085 |         |        |        | FALSE |
| hsa-miR-423-3p  | C7       | -6.93953 |         |        |        | FALSE |
| hsa-miR-101     | KIF20A   | -6.93937 |         |        |        | FALSE |
| hsa-miR-185     | GPRASP1  | -6.93935 |         |        |        | FALSE |
| hsa-miR-193b    | HLF      | -6.93922 |         |        |        | FALSE |
| hsa-miR-30e*    | NNMT     | -6.93845 |         |        |        | FALSE |
| hsa-miR-29a     | SPDL1    | -6.93754 | -0.9481 | -0.292 | 0.0108 | FALSE |
| hsa-miR-3614-5p | USP22    | -6.93738 |         |        |        | FALSE |
| hsa-miR-96      | FYB      | -6.93696 | -0.1575 | -0.228 |        | FALSE |
| hsa-miR-32      | PTRF     | -6.93624 |         |        |        | FALSE |
| hsa-miR-194*    | LOXL1    | -6.93462 |         |        |        | FALSE |
| hsa-miR-16      | FYCO1    | -6.93443 |         |        |        | FALSE |
| hsa-miR-181b    | PPP2R5A  | -6.93372 | -0.2206 |        |        | FALSE |
| hsa-miR-17      | OMD      | -6.9336  |         |        |        | FALSE |
| hsa-miR-30e*    | COL1A2   | -6.93359 |         |        |        | FALSE |

|                 |          |          |         |        |        |       |
|-----------------|----------|----------|---------|--------|--------|-------|
| hsa-miR-34a     | NRAS     | -6.93349 |         |        |        | FALSE |
| hsa-miR-502-3p  | NUAK1    | -6.93344 |         |        |        | FALSE |
| hsa-miR-17*     | IL1R1    | -6.93286 |         |        |        | FALSE |
| hsa-miR-744*    | MYH11    | -6.93262 |         |        |        | FALSE |
| hsa-miR-20a*    | ECM2     | -6.93244 |         |        |        | FALSE |
| hsa-miR-183     | NEXN     | -6.93195 |         |        |        | FALSE |
| hsa-miR-134     | CCDC125  | -6.93174 |         |        |        | FALSE |
| hsa-let-7f-2*   | ZEB1     | -6.93159 |         |        |        | FALSE |
| hsa-miR-200c    | RASL12   | -6.93145 |         |        |        | FALSE |
| hsa-miR-30c     | MMP2     | -6.93128 |         |        |        | FALSE |
| hsa-miR-141*    | MMP2     | -6.931   |         |        |        | FALSE |
| hsa-miR-19b     | TNFSF12  | -6.93062 |         |        |        | FALSE |
| hsa-miR-193b    | KIT      | -6.92992 | -0.2336 | -0.136 | 0.4921 | FALSE |
| hsa-miR-194*    | ISLR     | -6.92982 |         |        |        | FALSE |
| hsa-miR-532-5p  | ARSI     | -6.9298  |         |        |        | FALSE |
| hsa-miR-141     | MXRA8    | -6.92965 |         |        |        | FALSE |
| hsa-miR-183     | C10orf54 | -6.92945 |         |        |        | FALSE |
| hsa-miR-429     | SERPING1 | -6.92929 |         |        |        | FALSE |
| hsa-miR-125a-5p | PLK1     | -6.9292  |         |        |        | FALSE |
| hsa-miR-425*    | LRR32    | -6.9282  |         |        |        | FALSE |
| hsa-miR-29b     | TOP2B    | -6.92782 |         |        |        | FALSE |
| hsa-miR-942     | ASPN     | -6.92757 |         |        |        | FALSE |
| hsa-miR-101     | CALU     | -6.92743 |         |        |        | FALSE |
| hsa-miR-29c     | GPR161   | -6.92717 | -0.1088 | -0.224 | 0.0134 | FALSE |
| hsa-miR-194     | MRC2     | -6.92714 |         |        |        | FALSE |
| hsa-let-7d*     | TMSB10   | -6.92708 |         |        |        | FALSE |
| hsa-miR-30c     | COL5A1   | -6.92702 |         |        |        | FALSE |
| hsa-miR-200c*   | LMOD1    | -6.92587 |         |        |        | FALSE |
| hsa-miR-200a*   | DACT1    | -6.9253  |         |        |        | FALSE |
| hsa-miR-101     | BUB1     | -6.92473 |         |        |        | FALSE |
| hsa-miR-141     | TEK      | -6.92445 |         |        |        | FALSE |
| hsa-miR-200b*   | NID1     | -6.92414 |         |        |        | FALSE |
| hsa-miR-99b*    | RPLP1    | -6.92327 |         |        |        | FALSE |
| hsa-miR-382     | ULK3     | -6.92305 |         |        |        | FALSE |
| hsa-miR-223     | ZNF627   | -6.92215 |         |        |        | FALSE |
| hsa-miR-141     | ANTXR1   | -6.92187 | -0.1091 |        |        | FALSE |
| hsa-miR-200a    | JAM2     | -6.92174 |         |        |        | FALSE |
| hsa-miR-93      | FAP      | -6.92137 |         |        |        | FALSE |
| hsa-miR-18a*    | PRELP    | -6.92045 |         |        |        | FALSE |
| hsa-miR-625     | ANTXR1   | -6.92029 |         |        |        | FALSE |
| hsa-miR-429     | ARHGAP31 | -6.92018 |         |        |        | FALSE |
| hsa-miR-30a*    | CDC20    | -6.92005 |         |        |        | FALSE |
| hsa-miR-18b     | SSPN     | -6.91972 |         |        |        | FALSE |
| hsa-miR-107     | KCNMB1   | -6.91822 |         |        |        | FALSE |
| hsa-miR-654-3p  | ULK3     | -6.91734 |         |        |        | FALSE |

|                 |          |          |         |        |        |       |
|-----------------|----------|----------|---------|--------|--------|-------|
| hsa-miR-15b*    | ITGBL1   | -6.91653 |         |        |        | FALSE |
| hsa-miR-15b*    | PGM5     | -6.91648 |         |        |        | FALSE |
| hsa-miR-181c*   | PSME2    | -6.91543 |         |        |        | FALSE |
| hsa-miR-24      | SUOX     | -6.91516 |         |        |        | FALSE |
| hsa-miR-18a     | MVP      | -6.91493 |         |        |        | FALSE |
| hsa-miR-17      | PLN      | -6.91491 |         |        |        | FALSE |
| hsa-miR-511     | C14orf93 | -6.91396 |         |        |        | FALSE |
| hsa-miR-17*     | ACTA2    | -6.9132  |         |        |        | FALSE |
| hsa-miR-589     | FXD1     | -6.91243 |         |        |        | FALSE |
| hsa-miR-185     | PLN      | -6.9118  |         |        |        | FALSE |
| hsa-miR-19b     | MRVI1    | -6.91177 |         |        |        | FALSE |
| hsa-miR-3065-5p | MMP2     | -6.91167 |         |        |        | FALSE |
| hsa-miR-32      | CTHRC1   | -6.91143 |         |        |        | FALSE |
| hsa-miR-30a     | RRM1     | -6.91111 |         |        |        | FALSE |
| hsa-miR-651     | TIMP2    | -6.91037 |         |        |        | FALSE |
| hsa-miR-93      | RRAS     | -6.9101  |         |        |        | FALSE |
| hsa-miR-142-3p  | PUM1     | -6.90966 | -1.1322 | -0.425 | 0.4172 | FALSE |
| hsa-miR-188-5p  | PLN      | -6.90966 |         |        |        | FALSE |
| hsa-miR-15b*    | PODN     | -6.90894 |         |        |        | FALSE |
| hsa-miR-192*    | HTRA1    | -6.90877 |         |        |        | FALSE |
| hsa-miR-200a*   | RASL12   | -6.90835 |         |        |        | FALSE |
| hsa-miR-200a    | COL15A1  | -6.90832 | -1.2895 | -0.305 | 0.1744 | FALSE |
| hsa-miR-425     | ZCCHC24  | -6.90794 |         |        |        | FALSE |
| hsa-miR-429     | SIRPA    | -6.90675 | -0.8242 | -0.276 |        | FALSE |
| hsa-miR-664     | MYBL2    | -6.90659 |         |        |        | FALSE |
| hsa-miR-93      | ABCA6    | -6.90567 |         |        |        | FALSE |
| hsa-miR-200a*   | CCDC80   | -6.90565 |         |        |        | FALSE |
| hsa-miR-200c*   | MRC2     | -6.90552 |         |        |        | FALSE |
| hsa-miR-589*    | PBXIP1   | -6.90534 |         |        |        | FALSE |
| hsa-miR-629     | PPP1R12B | -6.90506 |         |        |        | FALSE |
| hsa-miR-16-2*   | AEBP1    | -6.90407 |         |        |        | FALSE |
| hsa-miR-577     | SORCS2   | -6.90368 |         |        |        | FALSE |
| hsa-miR-30a     | KIF2C    | -6.90333 | -0.1015 |        |        | FALSE |
| hsa-miR-29c     | MND1     | -6.90295 |         |        |        | FALSE |
| hsa-miR-191*    | MSRB3    | -6.90289 |         |        |        | FALSE |
| hsa-miR-3065-5p | ECM2     | -6.90209 |         |        |        | FALSE |
| hsa-miR-93*     | PTRF     | -6.90172 |         |        |        | FALSE |
| hsa-miR-30d*    | CNN1     | -6.9017  |         |        |        | FALSE |
| hsa-miR-191     | FAP      | -6.90144 |         |        |        | FALSE |
| hsa-miR-200c*   | AGTR1    | -6.90136 |         |        |        | FALSE |
| hsa-miR-200c*   | LIX1L    | -6.90121 |         |        |        | FALSE |
| hsa-miR-331-3p  | CBX7     | -6.90047 |         |        |        | FALSE |
| hsa-miR-33b     | AOC3     | -6.90043 |         |        |        | FALSE |
| hsa-miR-22      | ZNF627   | -6.90034 |         |        |        | FALSE |
| hsa-miR-532-5p  | SERPINE1 | -6.90017 |         |        |        | FALSE |

|                |          |          |         |        |        |       |
|----------------|----------|----------|---------|--------|--------|-------|
| hsa-miR-616*   | OGN      | -6.89992 |         |        |        | FALSE |
| hsa-miR-93     | PTRF     | -6.8998  |         | -0.043 |        | FALSE |
| hsa-miR-141*   | MYL9     | -6.89859 |         |        |        | FALSE |
| hsa-miR-30d*   | TSHZ3    | -6.89851 |         |        |        | FALSE |
| hsa-miR-1296   | TYROBP   | -6.89851 |         |        |        | FALSE |
| hsa-miR-29c    | YWHAQ    | -6.8984  |         |        |        | FALSE |
| hsa-miR-192    | PCOLCE   | -6.89813 |         |        |        | FALSE |
| hsa-miR-425    | SYNE1    | -6.8977  |         |        |        | FALSE |
| hsa-miR-18a    | MRVI1    | -6.89732 |         |        |        | FALSE |
| hsa-miR-92a-1* | BGN      | -6.89711 |         |        |        | FALSE |
| hsa-miR-200b*  | IKBIP    | -6.89643 |         |        |        | FALSE |
| hsa-miR-937    | LMOD1    | -6.89638 |         |        |        | FALSE |
| hsa-miR-1307   | COX7A1   | -6.896   |         |        |        | FALSE |
| hsa-miR-200a*  | PLXDC1   | -6.89598 |         |        |        | FALSE |
| hsa-miR-15b*   | SSPN     | -6.89556 |         |        |        | FALSE |
| hsa-miR-96     | MEF2C    | -6.8949  |         | -0.138 |        | FALSE |
| hsa-miR-19b    | C3       | -6.8942  |         |        |        | FALSE |
| hsa-miR-200a*  | ADAM12   | -6.89386 |         |        |        | FALSE |
| hsa-miR-33a*   | SERPING1 | -6.89361 |         |        |        | FALSE |
| hsa-miR-15a    | CSDC2    | -6.89329 |         |        |        | FALSE |
| hsa-miR-937    | VWA5A    | -6.89301 |         |        |        | FALSE |
| hsa-miR-215    | CYTH3    | -6.89193 |         |        |        | FALSE |
| hsa-miR-423-3p | PRELP    | -6.89136 |         |        |        | FALSE |
| hsa-miR-106b*  | CRYL1    | -6.89103 |         |        |        | FALSE |
| hsa-miR-182    | GLIPR1   | -6.88982 |         |        |        | FALSE |
| hsa-miR-30e*   | INHBA    | -6.88818 |         |        |        | FALSE |
| hsa-miR-21*    | ATP1A2   | -6.88799 |         |        |        | FALSE |
| hsa-miR-22     | HNRNPA1  | -6.88773 |         |        |        | FALSE |
| hsa-miR-200a*  | TPM2     | -6.88741 |         |        |        | FALSE |
| hsa-miR-30e*   | COL3A1   | -6.88701 |         |        |        | FALSE |
| hsa-miR-379    | CCDC125  | -6.88687 |         |        |        | FALSE |
| hsa-miR-30d*   | THY1     | -6.88586 |         |        |        | FALSE |
| hsa-miR-15b*   | PRELP    | -6.88505 |         |        |        | FALSE |
| hsa-miR-106b   | CTSO     | -6.88482 |         |        |        | FALSE |
| hsa-miR-642a   | SEMA5B   | -6.88441 |         |        |        | FALSE |
| hsa-miR-22*    | RALGAPA1 | -6.88384 |         |        |        | FALSE |
| hsa-miR-15b*   | HMCN1    | -6.88331 |         |        |        | FALSE |
| hsa-miR-3170   | SERPING1 | -6.88132 |         |        |        | FALSE |
| hsa-miR-183    | MEF2C    | -6.88063 | -1.2636 | -0.433 | 0.053  | FALSE |
| hsa-miR-16-2*  | PDGFRA   | -6.88017 |         |        |        | FALSE |
| hsa-miR-106b   | COL10A1  | -6.88003 |         |        |        | FALSE |
| hsa-miR-140-5p | INADL    | -6.87961 |         |        |        | FALSE |
| hsa-miR-106b   | KIAA0247 | -6.87853 | -0.2907 | -0.215 | 0.9311 | FALSE |
| hsa-miR-92a-1* | OCEL1    | -6.8784  |         |        |        | FALSE |
| hsa-miR-15b    | MYH11    | -6.87771 |         |        |        | FALSE |



|                 |          |          |         |        |       |
|-----------------|----------|----------|---------|--------|-------|
| hsa-miR-194*    | SSC5D    | -6.87739 |         |        | FALSE |
| hsa-miR-200c*   | TNFSF12  | -6.87725 |         |        | FALSE |
| hsa-miR-200c    | AEBP1    | -6.8772  |         |        | FALSE |
| hsa-miR-200b*   | TAGLN    | -6.877   |         |        | FALSE |
| hsa-miR-145*    | TMEM161B | -6.87696 |         |        | FALSE |
| hsa-miR-19a     | SSC5D    | -6.87671 |         |        | FALSE |
| hsa-miR-615-3p  | CD1C     | -6.87642 |         |        | FALSE |
| hsa-miR-16-2*   | LHFP     | -6.87625 |         |        | FALSE |
| hsa-miR-192     | GLT8D2   | -6.87511 |         |        | FALSE |
| hsa-miR-324-3p  | COX7A1   | -6.87473 |         |        | FALSE |
| hsa-miR-651     | MYLK     | -6.87455 |         |        | FALSE |
| hsa-miR-19b-1*  | OGN      | -6.87437 |         |        | FALSE |
| hsa-miR-181a-2* | SECTM1   | -6.87424 |         |        | FALSE |
| hsa-miR-664     | CENPA    | -6.8739  |         |        | FALSE |
| hsa-miR-210     | PI16     | -6.87239 |         |        | FALSE |
| hsa-miR-185*    | PLN      | -6.87178 |         |        | FALSE |
| hsa-miR-335     | SAMD9    | -6.87158 |         |        | FALSE |
| hsa-miR-301a    | CARD6    | -6.87102 |         |        | FALSE |
| hsa-miR-92a     | SMPD1    | -6.87078 |         |        | FALSE |
| hsa-miR-194*    | LUM      | -6.86999 |         |        | FALSE |
| hsa-miR-106b*   | GAPT     | -6.86973 |         |        | FALSE |
| hsa-miR-92a-1*  | COL6A3   | -6.86969 |         |        | FALSE |
| hsa-miR-429     | GLT8D2   | -6.86791 |         |        | FALSE |
| hsa-miR-664*    | FAM83D   | -6.86714 |         |        | FALSE |
| hsa-miR-30a     | SKA1     | -6.86692 |         |        | FALSE |
| hsa-miR-223     | ZNF441   | -6.86632 | -0.7256 |        | FALSE |
| hsa-miR-100     | ARHGEF39 | -6.86598 |         |        | FALSE |
| hsa-miR-200a*   | FIBIN    | -6.86568 |         |        | FALSE |
| hsa-miR-2355-3p | EMCN     | -6.86519 |         |        | FALSE |
| hsa-miR-200c    | CXCL12   | -6.86502 |         |        | FALSE |
| hsa-miR-223     | ZNF443   | -6.86474 |         |        | FALSE |
| hsa-miR-192     | BNC2     | -6.86441 |         |        | FALSE |
| hsa-miR-423-3p  | SPARCL1  | -6.86423 |         |        | FALSE |
| hsa-miR-19a     | ITGBL1   | -6.86349 |         |        | FALSE |
| hsa-miR-532-5p  | CTHRC1   | -6.86289 |         |        | FALSE |
| hsa-miR-29b     | MYH10    | -6.86284 |         |        | FALSE |
| hsa-miR-758     | TAPBP    | -6.86189 |         |        | FALSE |
| hsa-miR-429     | ADAM12   | -6.8616  | -1.1446 | -0.665 | FALSE |
| hsa-miR-182     | NNMT     | -6.8612  |         |        | FALSE |
| hsa-miR-30c     | FBN1     | -6.86074 |         |        | FALSE |
| hsa-miR-30d*    | COL15A1  | -6.86056 |         |        | FALSE |
| hsa-miR-16      | PODN     | -6.8605  |         | 0.0921 | FALSE |
| hsa-miR-495     | CRB3     | -6.86023 |         |        | FALSE |
| hsa-miR-19a     | TNS1     | -6.85967 |         |        | FALSE |
| hsa-miR-22*     | NARG2    | -6.85967 |         |        | FALSE |

|                 |          |          |         |         |        |       |
|-----------------|----------|----------|---------|---------|--------|-------|
| hsa-miR-15b*    | MGP      | -6.85952 |         |         |        | FALSE |
| hsa-miR-200c*   | CNPY4    | -6.85939 |         |         |        | FALSE |
| hsa-miR-15b*    | JAM2     | -6.85939 |         |         |        | FALSE |
| hsa-miR-200c*   | MYL9     | -6.85909 |         |         |        | FALSE |
| hsa-miR-125a-5p | CCNB2    | -6.85866 |         |         |        | FALSE |
| hsa-miR-589     | LIMS2    | -6.85832 |         |         |        | FALSE |
| hsa-miR-429     | ANGPTL1  | -6.85798 |         | -0.257  |        | FALSE |
| hsa-miR-652     | OMD      | -6.85697 |         |         |        | FALSE |
| hsa-miR-141*    | CNN1     | -6.85687 |         |         |        | FALSE |
| hsa-miR-150     | BOD1     | -6.85672 |         | -0.0506 | 0.1234 | FALSE |
| hsa-let-7c      | PPPDE2   | -6.85653 |         |         |        | FALSE |
| hsa-miR-22*     | KLHL11   | -6.85625 |         |         |        | FALSE |
| hsa-miR-130b    | TLR3     | -6.85531 |         |         |        | FALSE |
| hsa-miR-106b    | AEBP1    | -6.8551  |         |         |        | FALSE |
| hsa-miR-141*    | SYDE1    | -6.85497 |         |         |        | FALSE |
| hsa-miR-128     | ASPN     | -6.85452 |         |         |        | FALSE |
| hsa-miR-19b-1*  | GGT5     | -6.8532  |         |         |        | FALSE |
| hsa-miR-33b     | LMOD1    | -6.85274 |         |         |        | FALSE |
| hsa-miR-141     | BCL6B    | -6.85183 | -0.9417 | -0.323  | 0.109  | FALSE |
| hsa-miR-29b-2*  | SNAI2    | -6.85109 |         |         |        | FALSE |
| hsa-miR-200a*   | ATP8B2   | -6.85068 |         |         |        | FALSE |
| hsa-miR-200b*   | SERPING1 | -6.85055 |         |         |        | FALSE |
| hsa-miR-101     | CDC20    | -6.85045 |         |         |        | FALSE |
| hsa-miR-17      | IL16     | -6.85006 |         |         |        | FALSE |
| hsa-miR-326     | RPL18    | -6.84995 |         |         |        | FALSE |
| hsa-miR-22      | WDR17    | -6.84909 |         |         |        | FALSE |
| hsa-let-7d*     | SERPING1 | -6.84841 |         |         |        | FALSE |
| hsa-miR-200c    | HTRA1    | -6.84828 |         |         |        | FALSE |
| hsa-miR-629*    | GPR124   | -6.84787 |         |         |        | FALSE |
| hsa-miR-130b    | NTN4     | -6.84709 |         |         |        | FALSE |
| hsa-let-7f-2*   | LATS2    | -6.84695 |         |         |        | FALSE |
| hsa-miR-19a     | MYH11    | -6.84695 | -0.3234 | -0.187  | 0.0538 | FALSE |
| hsa-miR-192     | MRC2     | -6.84642 |         |         |        | FALSE |
| hsa-miR-660     | KCND2    | -6.84634 |         |         |        | FALSE |
| hsa-miR-101     | TUBB3    | -6.84572 |         |         |        | FALSE |
| hsa-miR-425*    | OGN      | -6.84555 |         |         |        | FALSE |
| hsa-miR-192     | COL5A2   | -6.84525 |         |         |        | FALSE |
| hsa-miR-192     | PRICKLE1 | -6.84485 |         |         |        | FALSE |
| hsa-miR-106b    | HPGDS    | -6.84415 |         |         |        | FALSE |
| hsa-miR-590-3p  | TIMP3    | -6.84402 |         |         |        | FALSE |
| hsa-miR-15b*    | NNMT     | -6.84389 |         |         |        | FALSE |
| hsa-miR-130b    | CREBL2   | -6.84386 | -0.2681 |         |        | FALSE |
| hsa-miR-223     | ZNF564   | -6.84329 |         |         |        | FALSE |
| hsa-miR-532-5p  | TMEM92   | -6.84322 |         |         |        | FALSE |
| hsa-miR-1307    | GMFG     | -6.84195 |         |         |        | FALSE |

|                |         |          |         |        |        |       |
|----------------|---------|----------|---------|--------|--------|-------|
| hsa-miR-374a   | HOXD8   | -6.84155 |         |        |        | FALSE |
| hsa-miR-101    | BUB1B   | -6.8415  | -0.1049 |        |        | FALSE |
| hsa-miR-32     | FMOD    | -6.84079 |         |        |        | FALSE |
| hsa-miR-141    | TIMP3   | -6.8396  |         |        |        | FALSE |
| hsa-miR-18a    | ECM2    | -6.83956 |         |        |        | FALSE |
| hsa-miR-93     | NEXN    | -6.83953 | -0.1113 |        |        | FALSE |
| hsa-miR-7-1*   | FAP     | -6.83904 |         |        |        | FALSE |
| hsa-miR-16-2*  | MYLK    | -6.83865 |         |        |        | FALSE |
| hsa-miR-378    | P4HA3   | -6.83851 |         |        |        | FALSE |
| hsa-miR-148b   | PODNL1  | -6.83828 |         |        |        | FALSE |
| hsa-miR-22*    | SIN3A   | -6.83818 |         |        |        | FALSE |
| hsa-miR-629    | RAI2    | -6.83814 |         |        |        | FALSE |
| hsa-miR-1296   | IFI35   | -6.83813 |         |        |        | FALSE |
| hsa-miR-483-5p | SQRDL   | -6.83738 |         |        |        | FALSE |
| hsa-miR-210    | RAMP2   | -6.83737 |         |        |        | FALSE |
| hsa-miR-92a    | HSPB8   | -6.8362  |         |        |        | FALSE |
| hsa-miR-425*   | COL14A1 | -6.83585 |         |        |        | FALSE |
| hsa-miR-590-5p | NEXN    | -6.83561 |         |        |        | FALSE |
| hsa-miR-200a   | PMP22   | -6.83497 |         |        |        | FALSE |
| hsa-miR-200b   | CNN1    | -6.83395 |         |        |        | FALSE |
| hsa-miR-324-3p | HLA-DRA | -6.83356 |         |        |        | FALSE |
| hsa-miR-192*   | DACT3   | -6.83308 |         |        |        | FALSE |
| hsa-miR-15b    | GLT8D2  | -6.8324  |         |        |        | FALSE |
| hsa-miR-16-2*  | MGP     | -6.83235 |         |        |        | FALSE |
| hsa-miR-3615   | MFAP4   | -6.83124 |         |        |        | FALSE |
| hsa-miR-19a    | AHNAK   | -6.83087 |         |        |        | FALSE |
| hsa-miR-326    | RPL35   | -6.83072 |         |        |        | FALSE |
| hsa-miR-183    | RNASE6  | -6.83064 |         |        |        | FALSE |
| hsa-miR-19b-1* | CTSA    | -6.83043 |         |        |        | FALSE |
| hsa-miR-651    | A2M     | -6.82964 |         |        |        | FALSE |
| hsa-miR-651    | MRVI1   | -6.82948 |         |        |        | FALSE |
| hsa-miR-181c*  | BATF2   | -6.82945 |         |        |        | FALSE |
| hsa-miR-186    | SGCD    | -6.82908 |         |        |        | FALSE |
| hsa-miR-210    | MUSTN1  | -6.8289  |         |        |        | FALSE |
| hsa-miR-337-3p | HSBP1L1 | -6.82789 |         |        |        | FALSE |
| hsa-miR-30d*   | MAGEL2  | -6.82787 |         |        |        | FALSE |
| hsa-miR-629*   | VSTM4   | -6.82771 |         |        |        | FALSE |
| hsa-miR-200c   | COL6A2  | -6.82679 |         |        |        | FALSE |
| hsa-miR-128    | LMOD1   | -6.82636 |         | -0.095 |        | FALSE |
| hsa-miR-200a*  | LAYN    | -6.82606 |         |        |        | FALSE |
| hsa-miR-30a*   | CDCA8   | -6.82601 |         |        |        | FALSE |
| hsa-miR-942    | SGCD    | -6.82464 |         |        |        | FALSE |
| hsa-miR-362-5p | COL6A3  | -6.82452 |         |        |        | FALSE |
| hsa-miR-183    | GNG2    | -6.82449 |         |        |        | FALSE |
| hsa-miR-30b    | PGM3    | -6.82407 | -1.1819 | -0.49  | 0.1805 | FALSE |

|                 |         |          |         |        |       |
|-----------------|---------|----------|---------|--------|-------|
| hsa-miR-454     | CNN1    | -6.82314 |         |        | FALSE |
| hsa-miR-425*    | HEG1    | -6.82216 |         |        | FALSE |
| hsa-miR-34c-3p  | MGAT4A  | -6.81912 |         |        | FALSE |
| hsa-miR-20a*    | OGN     | -6.81856 |         |        | FALSE |
| hsa-miR-1301    | MSRB3   | -6.81852 |         |        | FALSE |
| hsa-miR-18a*    | CD1C    | -6.81841 |         |        | FALSE |
| hsa-miR-29a     | PDCL    | -6.81829 |         |        | FALSE |
| hsa-miR-183     | FLT3LG  | -6.81816 |         |        | FALSE |
| hsa-miR-200c*   | TSHZ3   | -6.81601 |         |        | FALSE |
| hsa-miR-23a     | PRKAR2B | -6.8151  |         |        | FALSE |
| hsa-miR-664     | ARNTL2  | -6.81499 |         |        | FALSE |
| hsa-miR-651     | FAP     | -6.81486 |         |        | FALSE |
| hsa-miR-652     | MSRB3   | -6.81323 |         |        | FALSE |
| hsa-miR-223     | MOAP1   | -6.81305 |         |        | FALSE |
| hsa-miR-382     | TMEM80  | -6.81236 |         |        | FALSE |
| hsa-miR-511     | ZNF446  | -6.81224 |         |        | FALSE |
| hsa-miR-141*    | FBN1    | -6.81224 |         |        | FALSE |
| hsa-miR-183     | RAC2    | -6.81211 |         |        | FALSE |
| hsa-miR-194*    | TPM2    | -6.81154 |         |        | FALSE |
| hsa-miR-551b    | VDR     | -6.81126 |         |        | FALSE |
| hsa-miR-30c     | POSTN   | -6.80952 | -0.6043 |        | FALSE |
| hsa-miR-200b*   | LAMA4   | -6.8093  |         |        | FALSE |
| hsa-miR-210     | RASL12  | -6.80904 |         |        | FALSE |
| hsa-miR-96      | COLEC12 | -6.809   |         |        | FALSE |
| hsa-miR-29c*    | VCAN    | -6.80845 |         |        | FALSE |
| hsa-miR-200c*   | ANTXR1  | -6.80823 |         |        | FALSE |
| hsa-miR-194     | FRMD6   | -6.8081  | -0.4583 | -0.169 | FALSE |
| hsa-miR-22      | FANCL   | -6.80796 |         |        | FALSE |
| hsa-miR-429     | RHOJ    | -6.80709 |         |        | FALSE |
| hsa-miR-93*     | GGT5    | -6.80676 |         |        | FALSE |
| hsa-miR-148a*   | VAT1    | -6.80673 |         |        | FALSE |
| hsa-miR-1307    | CNN1    | -6.80607 |         |        | FALSE |
| hsa-miR-16      | AEBP1   | -6.80571 |         |        | FALSE |
| hsa-miR-501-5p  | MMP2    | -6.80501 |         |        | FALSE |
| hsa-miR-93      | C1S     | -6.80479 |         |        | FALSE |
| hsa-miR-18a     | IL16    | -6.80447 | -0.4105 |        | FALSE |
| hsa-miR-21*     | PRELP   | -6.80403 |         |        | FALSE |
| hsa-miR-200c    | PDE2A   | -6.80182 |         |        | FALSE |
| hsa-miR-744*    | SYNE1   | -6.80173 |         |        | FALSE |
| hsa-miR-423-3p  | FAP     | -6.80169 |         |        | FALSE |
| hsa-miR-15b     | PTH1R   | -6.80143 |         |        | FALSE |
| hsa-miR-590-5p  | GPR124  | -6.80107 |         |        | FALSE |
| hsa-miR-125a-5p | CDKN3   | -6.80105 |         |        | FALSE |
| hsa-miR-200a    | COL6A2  | -6.80101 |         |        | FALSE |
| hsa-miR-200c    | TSPAN4  | -6.8003  |         |        | FALSE |

|                |          |          |         |        |        |       |
|----------------|----------|----------|---------|--------|--------|-------|
| hsa-miR-203    | EID2B    | -6.79939 |         |        |        | FALSE |
| hsa-miR-22*    | ARID4A   | -6.79875 |         |        |        | FALSE |
| hsa-miR-200a   | GPR124   | -6.79822 |         |        |        | FALSE |
| hsa-miR-130b   | AHNAK    | -6.7974  |         |        |        | FALSE |
| hsa-miR-324-3p | MMP28    | -6.79668 |         |        |        | FALSE |
| hsa-miR-22*    | SECISBP2 | -6.7953  |         |        |        | FALSE |
| hsa-miR-200a*  | SNAI2    | -6.79501 |         |        |        | FALSE |
| hsa-miR-191    | CDH11    | -6.79484 |         |        |        | FALSE |
| hsa-miR-20a*   | PODN     | -6.79439 |         |        |        | FALSE |
| hsa-miR-330-3p | POSTN    | -6.79426 |         |        |        | FALSE |
| hsa-miR-200a   | TIMP3    | -6.79405 |         |        |        | FALSE |
| hsa-miR-30c    | THBS2    | -6.79401 | -0.2655 | -0.214 | 0.7666 | FALSE |
| hsa-miR-616*   | RBMS3    | -6.79383 |         |        |        | FALSE |
| hsa-miR-532-5p | ACTA2    | -6.79337 |         |        |        | FALSE |
| hsa-miR-500a   | FAP      | -6.79321 |         |        |        | FALSE |
| hsa-miR-423-3p | LHFP     | -6.79301 |         |        |        | FALSE |
| hsa-miR-454    | MMP2     | -6.79298 |         |        |        | FALSE |
| hsa-miR-29b-2* | COL5A1   | -6.79225 |         |        |        | FALSE |
| hsa-miR-23a*   | ENPP2    | -6.79095 |         |        |        | FALSE |
| hsa-miR-627    | PPP1R12B | -6.79066 |         |        |        | FALSE |
| hsa-miR-29c    | CCNB1    | -6.79052 |         |        |        | FALSE |
| hsa-miR-200a*  | ZEB2     | -6.79046 |         |        |        | FALSE |
| hsa-miR-22*    | PPM1A    | -6.78948 |         |        |        | FALSE |
| hsa-miR-92a-1* | MRVI1    | -6.78918 |         |        |        | FALSE |
| hsa-miR-200b   | NID2     | -6.78855 |         |        |        | FALSE |
| hsa-miR-181c*  | TYMP     | -6.78843 |         |        |        | FALSE |
| hsa-miR-210    | MYH11    | -6.78745 | -0.2534 | -0.134 | 0.0659 | FALSE |
| hsa-miR-20a    | MVP      | -6.78648 |         |        |        | FALSE |
| hsa-miR-200a*  | ACTA2    | -6.7862  |         |        |        | FALSE |
| hsa-miR-200b   | AEBP1    | -6.78576 |         |        |        | FALSE |
| hsa-miR-192*   | ZCCHC24  | -6.78559 |         |        |        | FALSE |
| hsa-miR-629*   | ZBTB47   | -6.78516 |         |        |        | FALSE |
| hsa-miR-15b*   | NEXN     | -6.785   |         |        |        | FALSE |
| hsa-miR-141    | LMOD1    | -6.78455 |         |        |        | FALSE |
| hsa-miR-148b   | SFRP2    | -6.78439 | -0.6161 |        |        | FALSE |
| hsa-miR-148b   | PALLD    | -6.78402 |         |        |        | FALSE |
| hsa-miR-155    | RAB40B   | -6.78349 |         |        |        | FALSE |
| hsa-miR-141    | SYDE1    | -6.78222 |         |        |        | FALSE |
| hsa-miR-664    | CDC20    | -6.78166 |         |        |        | FALSE |
| hsa-miR-200a   | CNN1     | -6.78157 |         |        |        | FALSE |
| hsa-miR-192    | GPR124   | -6.7808  |         |        |        | FALSE |
| hsa-miR-200b   | ADAMTS12 | -6.77997 |         |        |        | FALSE |
| hsa-miR-29b-1* | CACNA1C  | -6.77996 |         |        |        | FALSE |
| hsa-miR-19a    | CTSO     | -6.77974 |         | -0.173 |        | FALSE |
| hsa-miR-15b    | AEBP1    | -6.77936 |         |        |        | FALSE |

|                 |          |          |         |        |        |       |
|-----------------|----------|----------|---------|--------|--------|-------|
| hsa-miR-20a     | MGP      | -6.7792  |         |        |        | FALSE |
| hsa-miR-15a     | FIBIN    | -6.77858 |         | -0.124 | 0.2061 | FALSE |
| hsa-miR-3614-5p | CYB561D1 | -6.77713 |         |        |        | FALSE |
| hsa-miR-33a     | A2M      | -6.7768  |         |        |        | FALSE |
| hsa-miR-134     | FUK      | -6.77663 |         |        |        | FALSE |
| hsa-miR-200a    | VIM      | -6.77651 |         |        |        | FALSE |
| hsa-miR-30b     | ENTPD7   | -6.77626 |         |        |        | FALSE |
| hsa-miR-200b*   | SPARC    | -6.77546 |         |        |        | FALSE |
| hsa-miR-19b-1*  | JAM3     | -6.77523 |         |        |        | FALSE |
| hsa-miR-125a-5p | MTHFD2   | -6.77448 |         |        |        | FALSE |
| hsa-miR-425     | MYH11    | -6.77444 |         |        |        | FALSE |
| hsa-miR-200a*   | TSHZ3    | -6.77207 |         |        |        | FALSE |
| hsa-miR-200b*   | NID2     | -6.77193 |         |        |        | FALSE |
| hsa-miR-429     | GNB4     | -6.77174 | -0.5349 | -0.375 |        | FALSE |
| hsa-miR-429     | VEGFC    | -6.77168 |         |        |        | FALSE |
| hsa-miR-33b     | CROT     | -6.77116 | -2.0539 | -0.837 | 0.396  | FALSE |
| hsa-miR-192*    | PRELP    | -6.77105 |         |        |        | FALSE |
| hsa-miR-29c     | EXO1     | -6.77103 |         |        |        | FALSE |
| hsa-miR-331-3p  | TNS1     | -6.77046 |         |        |        | FALSE |
| hsa-miR-429     | COL15A1  | -6.77019 |         |        |        | FALSE |
| hsa-miR-409-3p  | FAM98C   | -6.76985 |         |        |        | FALSE |
| hsa-miR-431*    | HSBP1L1  | -6.76968 |         |        |        | FALSE |
| hsa-miR-337-3p  | ETV7     | -6.76903 |         |        |        | FALSE |
| hsa-miR-423-3p  | OMD      | -6.76897 |         |        |        | FALSE |
| hsa-miR-1       | CCDC150  | -6.76842 |         |        |        | FALSE |
| hsa-miR-141     | COL6A2   | -6.76819 |         |        |        | FALSE |
| hsa-miR-429     | POSTN    | -6.76811 |         |        |        | FALSE |
| hsa-miR-186     | CPA3     | -6.76805 |         |        |        | FALSE |
| hsa-miR-200a    | ANGPTL2  | -6.76793 |         |        |        | FALSE |
| hsa-miR-21*     | VAMP2    | -6.76785 |         |        |        | FALSE |
| hsa-miR-200b*   | C1QTNF6  | -6.76705 |         |        |        | FALSE |
| hsa-miR-17      | TPSB2    | -6.76663 |         |        |        | FALSE |
| hsa-miR-149     | GPRIN3   | -6.76637 |         |        |        | FALSE |
| hsa-miR-421     | SLC24A3  | -6.76626 |         |        |        | FALSE |
| hsa-miR-210     | HRC      | -6.76583 |         |        |        | FALSE |
| hsa-miR-193b    | ZDHHC15  | -6.76581 |         |        |        | FALSE |
| hsa-miR-181d    | CD68     | -6.76571 |         |        |        | FALSE |
| hsa-miR-200c    | DCN      | -6.76513 |         |        |        | FALSE |
| hsa-miR-142-3p  | RABGAP1  | -6.76512 |         |        |        | FALSE |
| hsa-miR-194*    | SYDE1    | -6.76485 |         |        |        | FALSE |
| hsa-miR-502-3p  | COL3A1   | -6.76485 |         |        |        | FALSE |
| hsa-miR-200a*   | FSTL1    | -6.76435 |         |        |        | FALSE |
| hsa-miR-576-5p  | ZCCHC24  | -6.76373 |         |        |        | FALSE |
| hsa-miR-141*    | CDH11    | -6.76307 |         |        |        | FALSE |
| hsa-miR-16      | ZCCHC24  | -6.76281 |         |        |        | FALSE |

|                 |          |          |         |        |        |       |
|-----------------|----------|----------|---------|--------|--------|-------|
| hsa-miR-30d     | ADAM12   | -6.76281 | -0.3137 | -0.334 | 0.4469 | FALSE |
| hsa-miR-181c*   | APOL3    | -6.76228 |         |        |        | FALSE |
| hsa-miR-141*    | CALD1    | -6.76203 |         |        |        | FALSE |
| hsa-miR-192     | COL12A1  | -6.76195 |         |        |        | FALSE |
| hsa-miR-423-3p  | MSRB3    | -6.7619  |         |        |        | FALSE |
| hsa-miR-345     | CBX7     | -6.76188 |         |        |        | FALSE |
| hsa-miR-194     | NOX4     | -6.76121 | -0.1047 |        |        | FALSE |
| hsa-miR-19b     | CPA3     | -6.76034 |         |        |        | FALSE |
| hsa-miR-200a*   | ITGA5    | -6.75996 |         |        |        | FALSE |
| hsa-miR-25      | ECM2     | -6.75858 |         |        |        | FALSE |
| hsa-miR-1       | EZH2     | -6.75811 |         |        |        | FALSE |
| hsa-miR-16-2*   | ITGBL1   | -6.75771 |         |        |        | FALSE |
| hsa-miR-93*     | LRRC32   | -6.75713 |         |        |        | FALSE |
| hsa-miR-200c    | GPR124   | -6.7569  |         |        |        | FALSE |
| hsa-miR-30d     | PDLIM7   | -6.75616 |         |        |        | FALSE |
| hsa-miR-32      | POSTN    | -6.75613 |         |        |        | FALSE |
| hsa-miR-15a     | SPARCL1  | -6.75602 |         |        |        | FALSE |
| hsa-miR-17      | MRVI1    | -6.75508 |         | -0.059 |        | FALSE |
| hsa-miR-19b-1*  | COL6A3   | -6.75507 |         |        |        | FALSE |
| hsa-miR-128     | CNN1     | -6.75495 |         |        |        | FALSE |
| hsa-miR-200a    | COL5A1   | -6.75495 |         |        |        | FALSE |
| hsa-let-7e*     | IDO1     | -6.75447 |         |        |        | FALSE |
| hsa-miR-7-1*    | MFAP5    | -6.75334 |         |        |        | FALSE |
| hsa-miR-324-3p  | CLDN5    | -6.75306 |         |        |        | FALSE |
| hsa-miR-18a*    | ABCA6    | -6.75303 |         |        |        | FALSE |
| hsa-miR-16-2*   | PTPRB    | -6.75232 |         |        |        | FALSE |
| hsa-miR-141     | PTRF     | -6.75216 |         |        |        | FALSE |
| hsa-miR-363     | CAST     | -6.75205 |         |        |        | FALSE |
| hsa-miR-326     | RPL8     | -6.752   |         |        |        | FALSE |
| hsa-miR-144*    | COMP     | -6.75161 |         |        |        | FALSE |
| hsa-miR-425*    | FHL1     | -6.75104 |         |        |        | FALSE |
| hsa-miR-93*     | ZEB1     | -6.75068 |         |        |        | FALSE |
| hsa-miR-200a*   | THY1     | -6.75064 |         |        |        | FALSE |
| hsa-miR-651     | EDNRA    | -6.75024 |         |        |        | FALSE |
| hsa-miR-128     | ACTG2    | -6.74993 |         |        |        | FALSE |
| hsa-miR-125a-5p | CENPE    | -6.74944 |         |        |        | FALSE |
| hsa-miR-193b    | ZFP2     | -6.7492  |         |        |        | FALSE |
| hsa-miR-101     | YKT6     | -6.74815 |         |        |        | FALSE |
| hsa-miR-185     | CALCOCO1 | -6.74813 |         |        |        | FALSE |
| hsa-miR-758     | PRKCD    | -6.74808 |         |        |        | FALSE |
| hsa-miR-654-3p  | HSBP1L1  | -6.74775 |         |        |        | FALSE |
| hsa-miR-101     | KIF2C    | -6.74772 |         |        |        | FALSE |
| hsa-miR-16-1*   | OGN      | -6.74667 |         |        |        | FALSE |
| hsa-miR-301a    | KIAA0247 | -6.74651 | -0.1244 | -0.169 | 0.006  | FALSE |
| hsa-miR-29b-1*  | MAP6     | -6.74636 |         |        |        | FALSE |

|                 |          |          |         |         |        |       |
|-----------------|----------|----------|---------|---------|--------|-------|
| hsa-miR-20a     | IL13RA1  | -6.74626 |         |         |        | FALSE |
| hsa-miR-29b-2*  | CALD1    | -6.7461  |         |         |        | FALSE |
| hsa-miR-15b     | ACTA2    | -6.74551 |         |         |        | FALSE |
| hsa-miR-381     | HSF4     | -6.7454  |         |         |        | FALSE |
| hsa-miR-30d*    | SFRP2    | -6.74529 |         |         |        | FALSE |
| hsa-miR-7-1*    | SLC24A3  | -6.744   |         |         |        | FALSE |
| hsa-miR-210     | CXorf36  | -6.74214 |         |         |        | FALSE |
| hsa-miR-106b    | CPA3     | -6.742   | -0.1994 |         |        | FALSE |
| hsa-miR-363     | TGFB1    | -6.74131 |         |         |        | FALSE |
| hsa-miR-18a*    | IGFBP7   | -6.74116 |         |         |        | FALSE |
| hsa-miR-192     | FAP      | -6.73894 |         |         |        | FALSE |
| hsa-miR-223*    | ZNF3     | -6.73846 |         |         |        | FALSE |
| hsa-miR-18a     | PODN     | -6.73826 | -0.2028 |         |        | FALSE |
| hsa-miR-19a     | C1QTNF7  | -6.73821 |         | -0.1555 | 0.0237 | FALSE |
| hsa-miR-2355-3p | RAI2     | -6.73792 |         |         |        | FALSE |
| hsa-miR-192     | SLC24A3  | -6.73711 |         |         |        | FALSE |
| hsa-miR-30d*    | OLFML2B  | -6.73685 |         |         |        | FALSE |
| hsa-miR-34a     | ASXL3    | -6.73677 |         |         |        | FALSE |
| hsa-miR-100     | CLN6     | -6.73623 |         |         |        | FALSE |
| hsa-miR-18a     | A2M      | -6.73543 |         |         |        | FALSE |
| hsa-miR-19a     | IL1R1    | -6.7354  | -0.4659 | -0.188  | 0.4366 | FALSE |
| hsa-miR-340     | LAD1     | -6.7353  |         |         |        | FALSE |
| hsa-miR-9*      | SGMS2    | -6.73482 |         |         |        | FALSE |
| hsa-miR-96      | PLSCR4   | -6.73453 |         |         |        | FALSE |
| hsa-miR-29a*    | TOP2B    | -6.7336  |         |         |        | FALSE |
| hsa-miR-186     | TPSB2    | -6.73303 |         |         |        | FALSE |
| hsa-miR-942     | SGCA     | -6.73296 |         |         |        | FALSE |
| hsa-miR-370     | RASSF7   | -6.73244 |         |         |        | FALSE |
| hsa-miR-362-5p  | COL5A2   | -6.7321  |         |         |        | FALSE |
| hsa-miR-193a-5p | CCDC28A  | -6.73186 |         |         |        | FALSE |
| hsa-miR-3065-5p | COL15A1  | -6.73135 |         |         |        | FALSE |
| hsa-miR-339-3p  | GALNTL2  | -6.73133 |         |         |        | FALSE |
| hsa-miR-22*     | RNF38    | -6.73125 |         |         |        | FALSE |
| hsa-miR-181c    | VDAC1    | -6.73091 | -0.2528 |         |        | FALSE |
| hsa-miR-200c*   | TPM2     | -6.73061 |         |         |        | FALSE |
| hsa-miR-577     | SLC24A3  | -6.73059 |         |         |        | FALSE |
| hsa-miR-181c*   | PRR13    | -6.73041 |         |         |        | FALSE |
| hsa-miR-141*    | FN1      | -6.73015 |         |         |        | FALSE |
| hsa-miR-574-3p  | MRPL54   | -6.72995 |         |         |        | FALSE |
| hsa-miR-651     | COL3A1   | -6.72892 |         |         |        | FALSE |
| hsa-miR-125a-5p | MELK     | -6.72744 |         |         |        | FALSE |
| hsa-miR-183     | CARD6    | -6.72712 |         |         |        | FALSE |
| hsa-miR-532-5p  | SERPING1 | -6.72712 |         |         |        | FALSE |
| hsa-miR-200b    | CAV1     | -6.72688 |         | -0.198  |        | FALSE |
| hsa-miR-152     | ILF3     | -6.72668 |         | -0.064  | 0.2342 | FALSE |



|                 |          |          |         |        |        |  |       |
|-----------------|----------|----------|---------|--------|--------|--|-------|
| hsa-miR-483-3p  | RORC     | -6.72653 |         |        |        |  | FALSE |
| hsa-miR-496     | PTPN6    | -6.72638 |         |        |        |  | FALSE |
| hsa-miR-652     | TNFAIP6  | -6.72631 |         |        |        |  | FALSE |
| hsa-miR-33a     | SPARCL1  | -6.72613 | -0.2558 |        |        |  | FALSE |
| hsa-miR-128     | ECM2     | -6.72578 |         |        |        |  | FALSE |
| hsa-miR-423-3p  | HOPX     | -6.72409 |         |        |        |  | FALSE |
| hsa-miR-141*    | CMTM3    | -6.72372 |         |        |        |  | FALSE |
| hsa-miR-29c     | KIF18A   | -6.72338 |         |        |        |  | FALSE |
| hsa-miR-18a*    | SSPN     | -6.72308 |         |        |        |  | FALSE |
| hsa-miR-301b    | C3       | -6.72298 |         |        |        |  | FALSE |
| hsa-miR-20a     | RNASE6   | -6.72141 |         |        |        |  | FALSE |
| hsa-miR-210     | ABCB1    | -6.72117 |         |        |        |  | FALSE |
| hsa-miR-200c*   | COL5A2   | -6.72089 |         |        |        |  | FALSE |
| hsa-miR-33b     | MYLK     | -6.72042 |         |        |        |  | FALSE |
| hsa-miR-200a*   | RAB31L1  | -6.72016 |         |        |        |  | FALSE |
| hsa-miR-363     | MVP      | -6.71907 |         |        |        |  | FALSE |
| hsa-miR-33b     | RECK     | -6.71884 | -0.4238 | -0.236 | 0.3543 |  | FALSE |
| hsa-miR-33b     | LAMA2    | -6.71859 |         |        |        |  | FALSE |
| hsa-miR-30d*    | GFPT2    | -6.71836 |         |        |        |  | FALSE |
| hsa-miR-130b    | SERPING1 | -6.718   |         |        |        |  | FALSE |
| hsa-miR-17      | CTSO     | -6.71789 |         |        |        |  | FALSE |
| hsa-miR-30a*    | FOXO1    | -6.71789 |         |        |        |  | FALSE |
| hsa-miR-1307    | CLEC3B   | -6.71763 |         |        |        |  | FALSE |
| hsa-miR-1       | KNTC1    | -6.71754 |         |        |        |  | FALSE |
| hsa-miR-16-1*   | SPARCL1  | -6.71745 |         |        |        |  | FALSE |
| hsa-miR-30a     | CDCA2    | -6.71736 |         |        |        |  | FALSE |
| hsa-miR-500a*   | TGFB1I1  | -6.71709 |         |        |        |  | FALSE |
| hsa-miR-577     | HOPX     | -6.71657 |         |        |        |  | FALSE |
| hsa-miR-93*     | CPA3     | -6.7158  |         |        |        |  | FALSE |
| hsa-miR-181d    | SRXN1    | -6.71521 |         |        |        |  | FALSE |
| hsa-miR-425*    | LMOD1    | -6.7152  |         |        |        |  | FALSE |
| hsa-miR-652     | P4HA3    | -6.71465 |         |        |        |  | FALSE |
| hsa-miR-194*    | LMOD1    | -6.71428 |         |        |        |  | FALSE |
| hsa-miR-200b*   | ACTA2    | -6.71367 |         |        |        |  | FALSE |
| hsa-miR-30d*    | ADAMTS12 | -6.71321 |         |        |        |  | FALSE |
| hsa-miR-106b    | CARD6    | -6.71301 |         |        |        |  | FALSE |
| hsa-miR-194*    | LTBP3    | -6.71268 |         |        |        |  | FALSE |
| hsa-miR-3127-5p | PLXDC1   | -6.71263 |         |        |        |  | FALSE |
| hsa-miR-590-5p  | FBN1     | -6.71258 |         | -0.094 | 0.0574 |  | FALSE |
| hsa-miR-15b*    | ACTA2    | -6.71203 |         |        |        |  | FALSE |
| hsa-miR-22      | HMGB2    | -6.71066 |         |        |        |  | FALSE |
| hsa-miR-15b*    | FXYD1    | -6.7105  |         |        |        |  | FALSE |
| hsa-miR-7-1*    | SGCD     | -6.70982 |         |        |        |  | FALSE |
| hsa-miR-942     | SCN4B    | -6.70967 |         |        |        |  | FALSE |
| hsa-miR-20a     | HPGDS    | -6.70898 |         |        |        |  | FALSE |

|                 |         |          |         |        |       |
|-----------------|---------|----------|---------|--------|-------|
| hsa-miR-200c*   | CRTAP   | -6.70804 |         |        | FALSE |
| hsa-miR-127-3p  | HSF4    | -6.70747 |         |        | FALSE |
| hsa-miR-15b*    | FAM198B | -6.70742 |         |        | FALSE |
| hsa-miR-423-3p  | NEXN    | -6.70721 |         |        | FALSE |
| hsa-miR-200b    | COL5A1  | -6.70659 |         |        | FALSE |
| hsa-miR-96      | PTGER3  | -6.70647 | -0.469  | 0.9492 | FALSE |
| hsa-miR-942     | SLC24A3 | -6.70608 |         |        | FALSE |
| hsa-miR-1180    | CSRP1   | -6.70558 |         |        | FALSE |
| hsa-miR-181c*   | SP110   | -6.70552 |         |        | FALSE |
| hsa-miR-186     | TPSAB1  | -6.7051  |         |        | FALSE |
| hsa-miR-200c    | TSHZ3   | -6.70474 |         |        | FALSE |
| hsa-miR-32      | GLT8D2  | -6.70463 |         |        | FALSE |
| hsa-miR-577     | COL5A2  | -6.70458 |         |        | FALSE |
| hsa-miR-15b*    | TIMP3   | -6.70345 |         |        | FALSE |
| hsa-miR-191*    | C1R     | -6.70326 |         |        | FALSE |
| hsa-miR-93      | IL16    | -6.70315 |         |        | FALSE |
| hsa-miR-194*    | SLC24A3 | -6.70297 |         |        | FALSE |
| hsa-miR-20a     | SMPD1   | -6.70267 |         |        | FALSE |
| hsa-miR-363     | ITGA3   | -6.70248 |         |        | FALSE |
| hsa-miR-15b*    | HNMT    | -6.70191 |         |        | FALSE |
| hsa-miR-92a     | OMD     | -6.70188 |         |        | FALSE |
| hsa-miR-19b     | HPGDS   | -6.70188 | -0.3007 |        | FALSE |
| hsa-miR-155     | SRSF8   | -6.70059 |         |        | FALSE |
| hsa-miR-576-5p  | MGP     | -6.70044 |         |        | FALSE |
| hsa-miR-33b     | RASL12  | -6.69974 |         |        | FALSE |
| hsa-miR-1301    | CNN1    | -6.6994  |         |        | FALSE |
| hsa-miR-149     | SOD2    | -6.69881 |         |        | FALSE |
| hsa-miR-210     | HSPA12B | -6.69853 |         |        | FALSE |
| hsa-miR-30e*    | BDKRB1  | -6.69832 |         |        | FALSE |
| hsa-miR-185*    | PLAC9   | -6.69709 |         |        | FALSE |
| hsa-miR-200a*   | PDLIM3  | -6.69707 |         |        | FALSE |
| hsa-miR-577     | DACT3   | -6.69683 |         |        | FALSE |
| hsa-miR-301b    | TLR3    | -6.69615 |         |        | FALSE |
| hsa-miR-130b    | IL16    | -6.69497 |         |        | FALSE |
| hsa-miR-181a-2* | GBP2    | -6.69418 |         |        | FALSE |
| hsa-miR-590-5p  | HMCN1   | -6.69289 |         |        | FALSE |
| hsa-miR-26a     | YWHAE   | -6.69277 | -0.12   | 0.5531 | FALSE |
| hsa-miR-27a*    | CACFD1  | -6.69254 |         |        | FALSE |
| hsa-miR-30d*    | LOXL1   | -6.69251 |         |        | FALSE |
| hsa-miR-20a*    | CACNA1C | -6.69209 |         |        | FALSE |
| hsa-miR-660     | RAB31   | -6.69157 |         |        | FALSE |
| hsa-miR-33b     | ZEB1    | -6.69113 | -0.1484 |        | FALSE |
| hsa-miR-15a     | DCN     | -6.69103 |         |        | FALSE |
| hsa-miR-200c*   | ANXA6   | -6.69094 |         |        | FALSE |
| hsa-miR-22      | RNF5    | -6.6906  |         |        | FALSE |

|                 |         |          |         |         |        |       |
|-----------------|---------|----------|---------|---------|--------|-------|
| hsa-miR-192*    | SFRP2   | -6.68948 |         |         |        | FALSE |
| hsa-miR-96      | GIMAP5  | -6.68892 |         |         |        | FALSE |
| hsa-miR-7-1*    | ANTXR1  | -6.68871 |         |         |        | FALSE |
| hsa-miR-17      | STOM    | -6.68841 | -0.6323 | -0.3745 |        | FALSE |
| hsa-miR-92a     | NNMT    | -6.688   |         |         |        | FALSE |
| hsa-miR-191     | CPA3    | -6.68743 |         |         |        | FALSE |
| hsa-miR-19b     | GAPT    | -6.68743 |         |         |        | FALSE |
| hsa-miR-30b     | COL3A1  | -6.6865  |         |         |        | FALSE |
| hsa-miR-29c     | KIF11   | -6.68591 |         |         |        | FALSE |
| hsa-miR-183     | IL15RA  | -6.68537 | -1.1236 | -0.282  |        | FALSE |
| hsa-miR-425*    | AEBP1   | -6.68535 |         |         |        | FALSE |
| hsa-miR-323-3p  | CBX7    | -6.68535 |         |         |        | FALSE |
| hsa-miR-29b-1*  | PRELP   | -6.68495 |         |         |        | FALSE |
| hsa-miR-935     | MAL2    | -6.68436 |         |         |        | FALSE |
| hsa-miR-20a*    | MYH11   | -6.68429 |         |         |        | FALSE |
| hsa-miR-16      | MSRB3   | -6.68352 |         |         |        | FALSE |
| hsa-miR-429     | RSPO3   | -6.6833  |         |         |        | FALSE |
| hsa-miR-629*    | ADAM33  | -6.68261 |         |         |        | FALSE |
| hsa-miR-429     | VIM     | -6.68236 |         |         |        | FALSE |
| hsa-miR-20a*    | ZCCHC24 | -6.68114 |         |         |        | FALSE |
| hsa-miR-194*    | MYL9    | -6.68051 |         |         |        | FALSE |
| hsa-miR-200a    | C1S     | -6.6805  |         |         |        | FALSE |
| hsa-miR-106a    | NEXN    | -6.67994 | -0.1115 |         |        | FALSE |
| hsa-miR-421     | ARHGAP1 | -6.67934 |         |         |        | FALSE |
| hsa-miR-16-2*   | SSC5D   | -6.67905 |         |         |        | FALSE |
| hsa-miR-214     | AUH     | -6.67888 |         |         |        | FALSE |
| hsa-miR-20a     | ECM2    | -6.67821 |         |         |        | FALSE |
| hsa-miR-30c-2*  | CENPW   | -6.67778 |         |         |        | FALSE |
| hsa-miR-33a*    | FAP     | -6.67718 |         |         |        | FALSE |
| hsa-miR-576-5p  | TPSB2   | -6.67658 |         |         |        | FALSE |
| hsa-miR-107     | TPM2    | -6.67556 |         |         |        | FALSE |
| hsa-miR-30a     | CDC20   | -6.67551 |         |         |        | FALSE |
| hsa-miR-30d*    | COL5A3  | -6.67536 |         |         |        | FALSE |
| hsa-miR-92a     | ZCCHC24 | -6.6753  |         |         |        | FALSE |
| hsa-miR-18a     | CARD6   | -6.67499 |         |         |        | FALSE |
| hsa-miR-194*    | PTRF    | -6.67492 |         |         |        | FALSE |
| hsa-miR-326     | RPS14   | -6.67313 |         |         |        | FALSE |
| hsa-miR-92a     | PPM1M   | -6.67302 |         |         |        | FALSE |
| hsa-miR-106b*   | VAMP8   | -6.67279 |         |         |        | FALSE |
| hsa-miR-194     | TGFB11  | -6.67269 |         |         |        | FALSE |
| hsa-miR-30d     | CALD1   | -6.67221 | -0.7394 | -0.255  | 0.4949 | FALSE |
| hsa-miR-152     | ZNF33A  | -6.67208 |         |         |        | FALSE |
| hsa-miR-103a-2* | SPARCL1 | -6.67203 |         |         |        | FALSE |
| hsa-miR-324-3p  | CTSS    | -6.67076 |         |         |        | FALSE |
| hsa-miR-942     | LRRC17  | -6.67072 |         |         |        | FALSE |

|                 |         |          |         |         |        |       |
|-----------------|---------|----------|---------|---------|--------|-------|
| hsa-miR-29b-1*  | GPR124  | -6.67071 |         |         |        | FALSE |
| hsa-miR-23a*    | OGN     | -6.67068 |         |         |        | FALSE |
| hsa-miR-200c    | BGN     | -6.67061 |         |         |        | FALSE |
| hsa-miR-20a*    | CTSO    | -6.6699  |         |         |        | FALSE |
| hsa-miR-101     | KIF11   | -6.66986 | -1.0066 | -0.4383 |        | FALSE |
| hsa-miR-30d*    | TIMP2   | -6.66985 |         |         |        | FALSE |
| hsa-miR-92a-1*  | COL10A1 | -6.66905 |         |         |        | FALSE |
| hsa-miR-186     | MSRB3   | -6.66898 |         |         |        | FALSE |
| hsa-miR-423-3p  | MS4A2   | -6.66865 |         |         |        | FALSE |
| hsa-miR-17      | GAPT    | -6.66862 |         |         |        | FALSE |
| hsa-miR-502-3p  | COL8A1  | -6.66831 |         |         |        | FALSE |
| hsa-miR-7-1*    | COL1A2  | -6.66802 |         |         |        | FALSE |
| hsa-miR-191     | COPZ2   | -6.66799 |         |         |        | FALSE |
| hsa-miR-106b    | MFSD1   | -6.66793 |         |         |        | FALSE |
| hsa-miR-429     | ITGA5   | -6.6675  |         |         |        | FALSE |
| hsa-miR-141*    | THY1    | -6.6672  |         |         |        | FALSE |
| hsa-miR-200b    | NNMT    | -6.66664 |         |         |        | FALSE |
| hsa-miR-192     | GLI3    | -6.66639 |         |         |        | FALSE |
| hsa-miR-16      | MFAP4   | -6.66613 |         |         |        | FALSE |
| hsa-miR-128     | MSRB3   | -6.66579 | -0.6106 | -0.259  |        | FALSE |
| hsa-let-7f-1*   | RABAC1  | -6.66556 |         |         |        | FALSE |
| hsa-miR-141     | EMP3    | -6.66555 |         |         |        | FALSE |
| hsa-miR-32      | DACT1   | -6.66536 | -0.6103 | -0.2    | 0.6727 | FALSE |
| hsa-miR-331-3p  | PLN     | -6.66526 |         |         |        | FALSE |
| hsa-miR-30a*    | DDX39A  | -6.66502 |         |         |        | FALSE |
| hsa-miR-16-2*   | HEPH    | -6.66465 |         |         |        | FALSE |
| hsa-miR-17      | KLF2    | -6.6643  |         |         |        | FALSE |
| hsa-miR-345     | PLSCR4  | -6.66408 |         |         |        | FALSE |
| hsa-miR-125a-5p | CDC20   | -6.66404 |         |         |        | FALSE |
| hsa-miR-25      | S100A11 | -6.66402 |         |         |        | FALSE |
| hsa-miR-340     | MAFK    | -6.66398 |         |         |        | FALSE |
| hsa-miR-141     | FSTL1   | -6.66383 |         |         |        | FALSE |
| hsa-miR-744     | IGFBP7  | -6.66382 |         |         |        | FALSE |
| hsa-miR-577     | LMOD1   | -6.66381 |         |         |        | FALSE |
| hsa-miR-15b*    | PTPRB   | -6.66368 |         |         |        | FALSE |
| hsa-miR-199b-3p | PIIP5K1 | -6.66359 |         |         |        | FALSE |
| hsa-miR-210     | AOC3    | -6.66357 |         |         |        | FALSE |
| hsa-miR-144     | COL10A1 | -6.66305 | -1.4062 | -0.214  |        | FALSE |
| hsa-miR-30d*    | SULF2   | -6.66214 |         |         |        | FALSE |
| hsa-miR-937     | CYBRD1  | -6.66206 |         |         |        | FALSE |
| hsa-miR-21*     | RGS5    | -6.66172 |         |         |        | FALSE |
| hsa-miR-7-1*    | DCN     | -6.66141 |         |         |        | FALSE |
| hsa-miR-16-2*   | FAP     | -6.66125 |         |         |        | FALSE |
| hsa-miR-30a     | SAPCD2  | -6.66089 |         | -0.045  |        | FALSE |
| hsa-miR-30a     | CCNB1   | -6.66084 |         |         |        | FALSE |

|                 |            |          |         |         |        |       |
|-----------------|------------|----------|---------|---------|--------|-------|
| hsa-miR-30b     | COL5A2     | -6.6608  | -0.3033 | -0.233  |        | FALSE |
| hsa-miR-200a*   | PDE2A      | -6.66058 |         |         |        | FALSE |
| hsa-miR-744*    | GBP2       | -6.66045 |         |         |        | FALSE |
| hsa-miR-192*    | RAB31      | -6.65896 |         |         |        | FALSE |
| hsa-miR-425*    | TNS1       | -6.65864 |         |         |        | FALSE |
| hsa-miR-200c    | IGFBP7     | -6.65843 |         |         |        | FALSE |
| hsa-miR-127-3p  | NDUFA7     | -6.65815 |         |         |        | FALSE |
| hsa-miR-19a     | MYOF       | -6.65784 |         |         |        | FALSE |
| hsa-miR-130b    | HLA-DPB1   | -6.65769 |         |         |        | FALSE |
| hsa-miR-221     | FAM35A     | -6.65764 | -1.7189 | -0.765  |        | FALSE |
| hsa-miR-200c*   | COL5A1     | -6.65724 |         |         |        | FALSE |
| hsa-miR-429     | STARD8     | -6.65659 | -0.4232 | -0.042  |        | FALSE |
| hsa-miR-200c*   | DACT1      | -6.65654 |         |         |        | FALSE |
| hsa-miR-200b    | MRC2       | -6.65651 |         |         |        | FALSE |
| hsa-miR-141     | SHE        | -6.65627 |         | -0.2102 | 0.2575 | FALSE |
| hsa-miR-32      | COL8A1     | -6.65538 |         |         |        | FALSE |
| hsa-miR-200a*   | COPZ2      | -6.65488 |         |         |        | FALSE |
| hsa-miR-425*    | CPA3       | -6.65477 |         |         |        | FALSE |
| hsa-miR-27a*    | ZNF252P-A5 | -6.65469 |         |         |        | FALSE |
| hsa-miR-629     | MGP        | -6.65459 |         |         |        | FALSE |
| hsa-miR-203     | PHF1       | -6.65408 |         |         |        | FALSE |
| hsa-miR-99a     | PPPDE2     | -6.6539  |         |         |        | FALSE |
| hsa-miR-128     | MRVI1      | -6.65363 |         |         |        | FALSE |
| hsa-miR-340*    | EHD2       | -6.65346 |         |         |        | FALSE |
| hsa-miR-339-3p  | MFRP       | -6.65345 |         |         |        | FALSE |
| hsa-miR-17      | KIAA0247   | -6.65298 | -0.2907 | -0.215  | 0.9311 | FALSE |
| hsa-miR-141     | SYNE1      | -6.65298 |         | -0.416  |        | FALSE |
| hsa-miR-192     | TMEM43     | -6.65286 |         |         |        | FALSE |
| hsa-miR-16-2*   | BGN        | -6.6525  |         |         |        | FALSE |
| hsa-miR-200c*   | PLXDC1     | -6.65225 |         |         |        | FALSE |
| hsa-miR-106b    | RAB31      | -6.65138 | -0.3688 | -0.278  |        | FALSE |
| hsa-miR-1301    | TIMP3      | -6.65104 |         |         |        | FALSE |
| hsa-miR-30d*    | MXRA5      | -6.65084 |         |         |        | FALSE |
| hsa-miR-29c*    | ENAH       | -6.6504  |         |         |        | FALSE |
| hsa-miR-130b*   | SERPING1   | -6.65007 |         |         |        | FALSE |
| hsa-miR-379     | RAD9A      | -6.64923 |         |         |        | FALSE |
| hsa-miR-429     | COL3A1     | -6.64919 | -0.2178 |         |        | FALSE |
| hsa-miR-92a     | RHOC       | -6.64907 |         |         |        | FALSE |
| hsa-miR-590-5p  | BMPR2      | -6.64818 | -0.1039 | -0.7561 | 0.5344 | FALSE |
| hsa-miR-1307    | PDLIM3     | -6.64812 |         |         |        | FALSE |
| hsa-miR-128     | TGFB111    | -6.64809 |         |         |        | FALSE |
| hsa-miR-200b    | ECM2       | -6.64719 | -0.1048 |         |        | FALSE |
| hsa-miR-3200-3p | GMFG       | -6.64688 |         |         |        | FALSE |
| hsa-miR-30b     | BZW1       | -6.64608 |         |         |        | FALSE |
| hsa-miR-223     | ZBED5      | -6.6456  |         |         |        | FALSE |

|                 |           |          |         |        |        |       |
|-----------------|-----------|----------|---------|--------|--------|-------|
| hsa-miR-17      | MFSD1     | -6.6453  |         |        |        | FALSE |
| hsa-miR-92a     | PBXIP1    | -6.64505 |         |        |        | FALSE |
| hsa-miR-194*    | LHFP      | -6.64503 |         |        |        | FALSE |
| hsa-miR-146a    | PLA2G12A  | -6.64391 |         |        |        | FALSE |
| hsa-miR-200b*   | ANTXR1    | -6.64335 |         |        |        | FALSE |
| hsa-miR-200c*   | LAMA4     | -6.64335 |         |        |        | FALSE |
| hsa-miR-222*    | ATP1B2    | -6.64305 |         |        |        | FALSE |
| hsa-miR-200c*   | FKBP7     | -6.64304 |         |        |        | FALSE |
| hsa-miR-18a     | TNS1      | -6.64279 |         |        |        | FALSE |
| hsa-miR-31      | TRIM24    | -6.64269 |         |        |        | FALSE |
| hsa-miR-210     | MYOCD     | -6.64257 |         |        |        | FALSE |
| hsa-miR-200a*   | TMEM55A   | -6.64247 |         |        |        | FALSE |
| hsa-miR-141*    | TPM2      | -6.64222 |         |        |        | FALSE |
| hsa-miR-410     | RASSF7    | -6.64193 |         |        |        | FALSE |
| hsa-miR-576-5p  | TPSAB1    | -6.64192 |         |        |        | FALSE |
| hsa-miR-181c    | CEP55     | -6.6419  |         |        |        | FALSE |
| hsa-miR-590-5p  | SLC24A3   | -6.64104 |         |        |        | FALSE |
| hsa-miR-96      | LATS2     | -6.64078 |         | -0.092 |        | FALSE |
| hsa-miR-22*     | ZNF740    | -6.6406  |         |        |        | FALSE |
| hsa-miR-200c*   | CMTM3     | -6.63955 |         |        |        | FALSE |
| hsa-miR-7-1*    | AOC3      | -6.63938 |         |        |        | FALSE |
| hsa-miR-143     | ZFYVE19   | -6.63907 |         |        |        | FALSE |
| hsa-miR-27a     | KIAA0319L | -6.6369  |         |        |        | FALSE |
| hsa-miR-151-5p  | SERPING1  | -6.63609 |         |        |        | FALSE |
| hsa-miR-629*    | C1QTNF7   | -6.63598 |         |        |        | FALSE |
| hsa-miR-141     | PDE1B     | -6.63579 |         |        |        | FALSE |
| hsa-miR-15b*    | GAPT      | -6.63566 |         |        |        | FALSE |
| hsa-miR-200a    | FSTL1     | -6.6354  |         |        |        | FALSE |
| hsa-miR-200b*   | CMTM3     | -6.63525 |         |        |        | FALSE |
| hsa-miR-379     | HSF4      | -6.63506 |         |        |        | FALSE |
| hsa-miR-30b     | ADAMTS2   | -6.63475 |         |        |        | FALSE |
| hsa-miR-454     | CARD6     | -6.63449 |         |        |        | FALSE |
| hsa-miR-194*    | PLN       | -6.63364 |         |        |        | FALSE |
| hsa-miR-429     | SULF1     | -6.63364 | -1.8003 | -0.646 | 0.2212 | FALSE |
| hsa-miR-1180    | VAMP8     | -6.63353 |         |        |        | FALSE |
| hsa-miR-3065-5p | ZFPM2     | -6.63352 |         |        |        | FALSE |
| hsa-miR-452*    | SYNE1     | -6.63312 |         |        |        | FALSE |
| hsa-miR-200c*   | AXL       | -6.63296 |         |        |        | FALSE |
| hsa-miR-106b*   | CYB5R1    | -6.63279 |         |        |        | FALSE |
| hsa-miR-194*    | NEXN      | -6.63271 |         |        |        | FALSE |
| hsa-miR-7-1*    | COLEC12   | -6.63242 |         |        |        | FALSE |
| hsa-miR-141     | CNN1      | -6.63228 |         |        |        | FALSE |
| hsa-miR-423-3p  | PDE1B     | -6.63222 |         |        |        | FALSE |
| hsa-miR-301a    | EFCAB14   | -6.63064 | -0.1008 |        |        | FALSE |
| hsa-miR-185*    | EEF1A1    | -6.62935 |         |        |        | FALSE |

|                |          |          |         |         |        |       |
|----------------|----------|----------|---------|---------|--------|-------|
| hsa-miR-616*   | TPSAB1   | -6.62807 |         |         |        | FALSE |
| hsa-miR-200a   | LAYN     | -6.62759 |         | -0.112  | 0.109  | FALSE |
| hsa-miR-200b   | AKAP2    | -6.62742 | -0.2875 | -0.051  | 0.7778 | FALSE |
| hsa-miR-744*   | LMOD1    | -6.6274  |         |         |        | FALSE |
| hsa-miR-22*    | ZKSCAN8  | -6.6274  |         |         |        | FALSE |
| hsa-miR-192    | PRELP    | -6.62681 |         | -0.0457 | 0.0878 | FALSE |
| hsa-miR-1180   | IGFBP7   | -6.6265  |         |         |        | FALSE |
| hsa-miR-191    | ZFPM2    | -6.62644 | -0.2351 |         |        | FALSE |
| hsa-miR-194*   | CYBRD1   | -6.626   |         |         |        | FALSE |
| hsa-miR-92a    | PLN      | -6.62598 |         |         |        | FALSE |
| hsa-miR-101    | ENTPD7   | -6.62597 |         |         |        | FALSE |
| hsa-miR-30e*   | LOXL2    | -6.62544 |         |         |        | FALSE |
| hsa-miR-22     | MTERFD3  | -6.62534 |         |         |        | FALSE |
| hsa-miR-345    | SYNE1    | -6.62475 |         |         |        | FALSE |
| hsa-miR-375    | RND3     | -6.62374 |         |         |        | FALSE |
| hsa-miR-616*   | ZNF423   | -6.62347 |         |         |        | FALSE |
| hsa-miR-101    | CLSPN    | -6.62332 |         |         |        | FALSE |
| hsa-miR-16-2*  | GLT8D2   | -6.6232  |         |         |        | FALSE |
| hsa-miR-93     | GLT8D2   | -6.62319 |         |         |        | FALSE |
| hsa-miR-22     | CEP95    | -6.62304 |         |         |        | FALSE |
| hsa-miR-33b    | FAT4     | -6.62151 |         |         |        | FALSE |
| hsa-miR-19b-1* | MSRB3    | -6.62097 |         |         |        | FALSE |
| hsa-miR-324-5p | ARHGEF6  | -6.62053 |         |         |        | FALSE |
| hsa-miR-135a   | OSMR     | -6.61992 |         |         |        | FALSE |
| hsa-miR-454    | ZCCHC24  | -6.61992 |         | -0.095  | 0.3417 | FALSE |
| hsa-miR-200a   | FILIP1L  | -6.61947 |         |         |        | FALSE |
| hsa-miR-664*   | CLSPN    | -6.61929 |         |         |        | FALSE |
| hsa-miR-141*   | ZFPM2    | -6.61926 |         |         |        | FALSE |
| hsa-miR-200c   | RHOJ     | -6.61914 |         |         |        | FALSE |
| hsa-miR-375    | QKI      | -6.61914 | -0.335  | -0.039  |        | FALSE |
| hsa-miR-149    | HLA-DRB1 | -6.6189  |         |         |        | FALSE |
| hsa-miR-181c*  | SLC35F6  | -6.61843 |         |         |        | FALSE |
| hsa-miR-29c    | MTMR2    | -6.61818 | -0.4341 | -0.128  | 0.0108 | FALSE |
| hsa-miR-128    | HOPX     | -6.61789 |         |         |        | FALSE |
| hsa-miR-194*   | RBMS3    | -6.61782 |         |         |        | FALSE |
| hsa-miR-409-3p | C6orf136 | -6.61716 |         |         |        | FALSE |
| hsa-miR-590-3p | ZBTB4    | -6.61683 |         |         |        | FALSE |
| hsa-miR-200b*  | AKAP2    | -6.61659 |         |         |        | FALSE |
| hsa-miR-200a*  | FAM26E   | -6.61628 |         |         |        | FALSE |
| hsa-miR-30a*   | PLK1     | -6.61603 |         |         |        | FALSE |
| hsa-miR-29b-1* | MYH11    | -6.61561 |         |         |        | FALSE |
| hsa-miR-181c*  | RNF149   | -6.61545 |         |         |        | FALSE |
| hsa-miR-324-5p | LDLRAD4  | -6.61458 |         |         |        | FALSE |
| hsa-miR-141    | ATP8B2   | -6.61406 |         |         |        | FALSE |
| hsa-miR-200c   | C16orf45 | -6.61284 |         |         |        | FALSE |

|                |          |          |         |        |        |       |
|----------------|----------|----------|---------|--------|--------|-------|
| hsa-miR-18a*   | CD1E     | -6.61273 |         |        |        | FALSE |
| hsa-miR-301a   | CXorf36  | -6.6122  |         |        |        | FALSE |
| hsa-miR-17     | GIMAP1   | -6.61196 |         |        |        | FALSE |
| hsa-miR-382    | HDHD3    | -6.61152 |         |        |        | FALSE |
| hsa-miR-425*   | MYH11    | -6.61072 |         |        |        | FALSE |
| hsa-miR-29c    | DSCC1    | -6.6103  |         | -0.13  |        | FALSE |
| hsa-miR-200b   | VEGFC    | -6.61012 |         |        |        | FALSE |
| hsa-miR-200c*  | NAP1L3   | -6.60992 |         |        |        | FALSE |
| hsa-miR-200a   | GNG11    | -6.60954 |         |        |        | FALSE |
| hsa-miR-4326   | CBX7     | -6.60947 |         |        |        | FALSE |
| hsa-miR-369-5p | PSD4     | -6.60941 |         |        |        | FALSE |
| hsa-miR-183    | LAT2     | -6.60932 |         |        |        | FALSE |
| hsa-miR-215    | COL6A3   | -6.60888 |         |        |        | FALSE |
| hsa-miR-20a    | CBX7     | -6.6086  |         | -0.062 |        | FALSE |
| hsa-miR-200b*  | WISP1    | -6.60859 |         |        |        | FALSE |
| hsa-miR-301a   | PTPRB    | -6.60859 |         |        |        | FALSE |
| hsa-miR-150    | VPS37D   | -6.60838 |         |        |        | FALSE |
| hsa-miR-30d*   | GAS1     | -6.60838 |         |        |        | FALSE |
| hsa-miR-1180   | ARHGAP15 | -6.60783 |         |        |        | FALSE |
| hsa-miR-502-3p | MMP2     | -6.60771 |         |        |        | FALSE |
| hsa-miR-194*   | FHL3     | -6.60762 |         |        |        | FALSE |
| hsa-miR-576-5p | MXRA8    | -6.60745 |         |        |        | FALSE |
| hsa-miR-30b*   | SEC23A   | -6.60721 |         |        |        | FALSE |
| hsa-miR-194    | VCL      | -6.60678 |         |        |        | FALSE |
| hsa-miR-19b-1* | ACTA2    | -6.60628 |         |        |        | FALSE |
| hsa-miR-134    | TRMT10B  | -6.60618 |         |        |        | FALSE |
| hsa-miR-152    | ACVR2B   | -6.60594 |         | -0.139 | 0.8016 | FALSE |
| hsa-miR-7-1*   | FNDC1    | -6.6059  |         |        |        | FALSE |
| hsa-miR-590-5p | PODN     | -6.6056  |         |        |        | FALSE |
| hsa-miR-192    | HTRA3    | -6.60466 |         |        |        | FALSE |
| hsa-miR-505    | MYH11    | -6.60454 |         |        |        | FALSE |
| hsa-miR-106b   | PRKG1    | -6.60385 |         |        |        | FALSE |
| hsa-miR-18a    | OGN      | -6.60383 |         |        |        | FALSE |
| hsa-miR-760    | YPEL5    | -6.60365 |         |        |        | FALSE |
| hsa-miR-1307   | HIGD1B   | -6.60332 |         |        |        | FALSE |
| hsa-miR-130b   | A2M      | -6.60296 |         |        |        | FALSE |
| hsa-miR-425*   | PODN     | -6.6029  |         |        |        | FALSE |
| hsa-miR-15a    | PRELP    | -6.60261 |         | -0.01  | 0.2449 | FALSE |
| hsa-miR-324-3p | GMFG     | -6.60254 |         |        |        | FALSE |
| hsa-let-7e*    | GCH1     | -6.6018  |         |        |        | FALSE |
| hsa-miR-17     | TENC1    | -6.60174 |         |        |        | FALSE |
| hsa-miR-186    | HTRA3    | -6.59899 |         |        |        | FALSE |
| hsa-miR-589*   | OGN      | -6.59619 |         |        |        | FALSE |
| hsa-miR-17     | CNN1     | -6.59613 | -0.9442 | -0.277 | 0.1658 | FALSE |
| hsa-miR-194    | ITGA5    | -6.59556 |         |        |        | FALSE |



|                 |          |          |         |        |        |       |
|-----------------|----------|----------|---------|--------|--------|-------|
| hsa-miR-1307    | EVI2A    | -6.59531 |         |        |        | FALSE |
| hsa-miR-330-5p  | RPS3A    | -6.59512 |         |        |        | FALSE |
| hsa-miR-181c*   | IFI35    | -6.59422 |         |        |        | FALSE |
| hsa-miR-186     | COL1A2   | -6.59306 |         |        |        | FALSE |
| hsa-miR-141     | STARD8   | -6.59265 |         |        |        | FALSE |
| hsa-miR-17*     | HPGDS    | -6.59264 |         |        |        | FALSE |
| hsa-miR-16-2*   | PGM5     | -6.5926  |         |        |        | FALSE |
| hsa-miR-625*    | FAM19A5  | -6.59205 |         |        |        | FALSE |
| hsa-miR-194*    | THBS2    | -6.59187 |         |        |        | FALSE |
| hsa-miR-16      | MXRA8    | -6.59069 |         |        |        | FALSE |
| hsa-miR-92a     | MYL9     | -6.59067 |         |        |        | FALSE |
| hsa-miR-130b*   | MRVI1    | -6.59021 |         |        |        | FALSE |
| hsa-miR-338-3p  | DPYSL3   | -6.59013 |         |        |        | FALSE |
| hsa-miR-629*    | OGN      | -6.59013 |         |        |        | FALSE |
| hsa-miR-19b     | NBL1     | -6.58921 |         |        |        | FALSE |
| hsa-miR-192*    | COL3A1   | -6.58906 |         |        |        | FALSE |
| hsa-miR-532-5p  | AEBP1    | -6.58885 |         |        |        | FALSE |
| hsa-miR-200c*   | GNG11    | -6.58863 |         |        |        | FALSE |
| hsa-miR-495     | GSTK1    | -6.58822 |         |        |        | FALSE |
| hsa-miR-576-5p  | CNN1     | -6.58818 |         |        |        | FALSE |
| hsa-miR-148b    | COL12A1  | -6.58811 |         |        |        | FALSE |
| hsa-miR-200a*   | EDNRA    | -6.58783 |         |        |        | FALSE |
| hsa-miR-16-2*   | GALNTL2  | -6.58751 |         |        |        | FALSE |
| hsa-miR-30d     | GREM1    | -6.58744 |         |        |        | FALSE |
| hsa-miR-889     | ECHDC2   | -6.58667 |         |        |        | FALSE |
| hsa-miR-194*    | NOX4     | -6.5865  |         |        |        | FALSE |
| hsa-miR-651     | PDGFRA   | -6.58629 |         |        |        | FALSE |
| hsa-miR-183     | NNMT     | -6.58621 |         |        |        | FALSE |
| hsa-miR-335*    | CARD6    | -6.58562 |         |        |        | FALSE |
| hsa-miR-200b*   | RHOJ     | -6.58555 |         |        |        | FALSE |
| hsa-miR-125a-5p | UBE2T    | -6.58451 |         |        |        | FALSE |
| hsa-miR-3127-5p | MFRP     | -6.5845  |         |        |        | FALSE |
| hsa-miR-15b     | TMEM204  | -6.58335 |         |        |        | FALSE |
| hsa-miR-197     | MYH11    | -6.58323 |         |        |        | FALSE |
| hsa-miR-30d*    | MMP14    | -6.5832  |         |        |        | FALSE |
| hsa-miR-30d*    | CRISPLD2 | -6.58298 |         |        |        | FALSE |
| hsa-miR-30a     | NUF2     | -6.58247 |         |        |        | FALSE |
| hsa-miR-425*    | CTSG     | -6.58233 |         |        |        | FALSE |
| hsa-miR-30c     | FN1      | -6.58214 |         |        |        | FALSE |
| hsa-miR-532-5p  | RAB31    | -6.58167 |         |        |        | FALSE |
| hsa-miR-155     | INPP5A   | -6.58137 | -0.3802 | -0.159 | 0.0566 | FALSE |
| hsa-miR-143     | CLASRP   | -6.58119 |         |        |        | FALSE |
| hsa-miR-141*    | EMILIN1  | -6.58092 |         |        |        | FALSE |
| hsa-miR-29c     | C4orf46  | -6.58049 |         |        |        | FALSE |
| hsa-miR-200b*   | CXCL12   | -6.58043 |         |        |        | FALSE |

|                 |           |          |         |        |        |       |
|-----------------|-----------|----------|---------|--------|--------|-------|
| hsa-miR-629     | POPDC2    | -6.58042 |         |        |        | FALSE |
| hsa-miR-1180    | NAALADL1  | -6.57979 |         |        |        | FALSE |
| hsa-miR-651     | COL6A3    | -6.57978 |         |        |        | FALSE |
| hsa-miR-30a*    | UBE2T     | -6.57927 |         |        |        | FALSE |
| hsa-miR-20a*    | NNMT      | -6.57917 |         |        |        | FALSE |
| hsa-miR-421     | TLR5      | -6.57904 |         |        |        | FALSE |
| hsa-miR-101     | PLOD1     | -6.57895 |         |        |        | FALSE |
| hsa-miR-149     | DOCK10    | -6.57852 |         |        |        | FALSE |
| hsa-miR-106b*   | GABARAPL2 | -6.57843 |         |        |        | FALSE |
| hsa-miR-30d*    | DCN       | -6.57835 |         |        |        | FALSE |
| hsa-miR-200a    | RHOJ      | -6.57796 |         |        |        | FALSE |
| hsa-miR-200b*   | STARD8    | -6.57789 |         |        |        | FALSE |
| hsa-miR-744*    | MRVI1     | -6.57756 |         |        |        | FALSE |
| hsa-miR-19b     | IL16      | -6.57745 |         |        |        | FALSE |
| hsa-miR-3065-3p | KCNMB1    | -6.5768  |         |        |        | FALSE |
| hsa-miR-30c     | PLAUR     | -6.5767  |         |        |        | FALSE |
| hsa-miR-363     | SBDS      | -6.57637 |         |        |        | FALSE |
| hsa-miR-200c    | FKBP7     | -6.57634 |         |        |        | FALSE |
| hsa-miR-29c     | TSR1      | -6.57621 |         |        |        | FALSE |
| hsa-miR-18a     | TK2       | -6.57539 |         |        |        | FALSE |
| hsa-miR-29a     | EIF4E2    | -6.57512 | -1.3446 | -0.434 | 0.0182 | FALSE |
| hsa-miR-1226    | LMOD1     | -6.57484 |         |        |        | FALSE |
| hsa-miR-200b    | TMEM55A   | -6.57478 | -0.602  |        |        | FALSE |
| hsa-miR-30d     | SNAI2     | -6.57474 | -1.1098 |        | 0.3112 | FALSE |
| hsa-miR-191     | NEXN      | -6.57454 |         |        |        | FALSE |
| hsa-miR-141*    | LMOD1     | -6.57391 |         |        |        | FALSE |
| hsa-miR-191*    | JAM3      | -6.57248 |         |        |        | FALSE |
| hsa-miR-454     | MRVI1     | -6.57232 |         |        |        | FALSE |
| hsa-miR-194*    | FNDC1     | -6.572   |         |        |        | FALSE |
| hsa-let-7b      | HIC2      | -6.57179 | -0.2002 | -0.403 | 0.9988 | FALSE |
| hsa-miR-29b     | SGCD      | -6.57153 |         |        |        | FALSE |
| hsa-miR-370     | C22orf32  | -6.57127 |         |        |        | FALSE |
| hsa-miR-1307    | ANGPTL1   | -6.57116 |         |        |        | FALSE |
| hsa-miR-493*    | AMT       | -6.57098 |         |        |        | FALSE |
| hsa-miR-17      | CACNA1C   | -6.57076 |         |        |        | FALSE |
| hsa-miR-96      | ECM2      | -6.57058 |         |        |        | FALSE |
| hsa-miR-200c    | LMOD1     | -6.57012 |         |        |        | FALSE |
| hsa-miR-142-5p  | SPIN1     | -6.5699  |         |        |        | FALSE |
| hsa-miR-22*     | LATS1     | -6.56987 |         |        |        | FALSE |
| hsa-miR-222     | RALGAPA1  | -6.5698  | -1.5192 | -0.411 | 0.3536 | FALSE |
| hsa-miR-200b    | LEPRE1    | -6.5695  |         |        |        | FALSE |
| hsa-miR-937     | MYH11     | -6.56947 |         |        |        | FALSE |
| hsa-miR-411     | CCDC125   | -6.56924 |         |        |        | FALSE |
| hsa-miR-101*    | MAPK6     | -6.56857 |         |        |        | FALSE |
| hsa-miR-141     | CFL2      | -6.56801 | -0.6882 | -0.226 | 0.1812 | FALSE |

|                |           |          |         |        |        |       |
|----------------|-----------|----------|---------|--------|--------|-------|
| hsa-miR-33b    | JAM2      | -6.56727 |         |        |        | FALSE |
| hsa-miR-29b-1* | CPXM2     | -6.56722 |         |        |        | FALSE |
| hsa-miR-1180   | HOPX      | -6.56715 |         |        |        | FALSE |
| hsa-miR-590-5p | ITGA11    | -6.56694 |         |        |        | FALSE |
| hsa-miR-424    | P4HTM     | -6.56692 |         |        |        | FALSE |
| hsa-miR-203    | PHTF1     | -6.56627 |         |        |        | FALSE |
| hsa-miR-30e    | LAMB1     | -6.56545 |         |        |        | FALSE |
| hsa-miR-323-3p | PSD4      | -6.56535 |         |        |        | FALSE |
| hsa-miR-30c-2* | CCNB1     | -6.56529 |         |        |        | FALSE |
| hsa-miR-25     | RRAS      | -6.565   |         |        |        | FALSE |
| hsa-miR-141*   | MFGE8     | -6.56496 |         |        |        | FALSE |
| hsa-miR-19b-1* | ARHGAP1   | -6.56461 |         |        |        | FALSE |
| hsa-miR-369-5p | MCM9      | -6.56452 |         |        |        | FALSE |
| hsa-miR-200b   | PRRX1     | -6.56448 | -0.2743 |        |        | FALSE |
| hsa-let-7d*    | DNAJB9    | -6.56376 |         |        |        | FALSE |
| hsa-miR-152    | BRD8      | -6.56316 |         |        |        | FALSE |
| hsa-miR-144*   | LRRC15    | -6.56287 |         |        |        | FALSE |
| hsa-miR-200b   | LAYN      | -6.56184 |         |        |        | FALSE |
| hsa-miR-186    | C16orf45  | -6.56139 |         |        |        | FALSE |
| hsa-miR-29b    | DCHS1     | -6.56038 |         |        |        | FALSE |
| hsa-miR-210    | ABCA8     | -6.56014 |         |        |        | FALSE |
| hsa-miR-141    | TIMP2     | -6.55949 |         |        |        | FALSE |
| hsa-miR-18b    | CPED1     | -6.55933 |         |        |        | FALSE |
| hsa-miR-29c    | SMARCC1   | -6.55894 | -1.5131 | -0.224 | 0.1317 | FALSE |
| hsa-miR-141*   | DCHS1     | -6.55791 |         |        |        | FALSE |
| hsa-miR-29c*   | AFAP1     | -6.55763 |         |        |        | FALSE |
| hsa-miR-577    | LRRC32    | -6.55688 |         |        |        | FALSE |
| hsa-miR-17     | ASPN      | -6.55646 | -0.1069 |        |        | FALSE |
| hsa-miR-942    | SSC5D     | -6.55527 |         |        |        | FALSE |
| hsa-miR-30b*   | POSTN     | -6.55526 |         |        |        | FALSE |
| hsa-miR-326    | RPL15     | -6.55448 |         |        |        | FALSE |
| hsa-miR-652    | SPARC     | -6.55443 |         |        |        | FALSE |
| hsa-miR-502-3p | NOTCH3    | -6.55416 |         |        |        | FALSE |
| hsa-miR-589*   | LDLRAD4   | -6.55383 |         |        |        | FALSE |
| hsa-miR-708    | KIAA0319L | -6.55261 |         |        |        | FALSE |
| hsa-miR-363    | NBL1      | -6.55123 |         |        |        | FALSE |
| hsa-miR-502-3p | MMP16     | -6.55117 |         |        |        | FALSE |
| hsa-miR-511    | GTF2IRD2B | -6.55078 |         |        |        | FALSE |
| hsa-miR-16     | ECM2      | -6.5505  |         |        |        | FALSE |
| hsa-miR-141    | OLFML1    | -6.54962 |         |        |        | FALSE |
| hsa-miR-200b   | RAB3IL1   | -6.54941 |         |        |        | FALSE |
| hsa-miR-200b*  | CDH11     | -6.54926 |         |        |        | FALSE |
| hsa-miR-33a*   | NEXN      | -6.54913 |         |        |        | FALSE |
| hsa-miR-194*   | DPYSL3    | -6.54902 |         |        |        | FALSE |
| hsa-miR-324-5p | GBP2      | -6.54885 |         |        |        | FALSE |

|                 |          |          |         |         |        |       |
|-----------------|----------|----------|---------|---------|--------|-------|
| hsa-miR-30c     | GBP1     | -6.54878 | -0.5083 | -0.217  |        | FALSE |
| hsa-miR-194*    | PDLIM3   | -6.54828 |         |         |        | FALSE |
| hsa-miR-30d*    | ADAMTS2  | -6.5481  |         |         |        | FALSE |
| hsa-miR-1180    | PLN      | -6.54808 |         |         |        | FALSE |
| hsa-miR-200a*   | NEDD4    | -6.54778 |         |         |        | FALSE |
| hsa-miR-1180    | ARHGDI3  | -6.5477  |         |         |        | FALSE |
| hsa-let-7a*     | CD48     | -6.54755 |         |         |        | FALSE |
| hsa-miR-16-2*   | FBN1     | -6.54739 |         |         |        | FALSE |
| hsa-miR-33b     | RHOJ     | -6.54644 |         |         |        | FALSE |
| hsa-miR-200b*   | AOC3     | -6.546   |         |         |        | FALSE |
| hsa-miR-106a    | SERINC1  | -6.54574 | -0.5421 | -0.074  |        | FALSE |
| hsa-miR-192     | CNN2     | -6.54517 |         |         |        | FALSE |
| hsa-let-7b      | CDC34    | -6.54509 | -0.193  | -0.383  | 0.9954 | FALSE |
| hsa-miR-379     | HDHD3    | -6.54448 |         |         |        | FALSE |
| hsa-miR-21      | SUV420H1 | -6.54438 |         |         |        | FALSE |
| hsa-miR-328     | RPL35    | -6.54416 |         |         |        | FALSE |
| hsa-miR-145     | OXSM     | -6.54372 |         |         |        | FALSE |
| hsa-miR-144*    | COL11A1  | -6.5437  |         |         |        | FALSE |
| hsa-miR-32      | ADAM12   | -6.54314 |         |         |        | FALSE |
| hsa-miR-222*    | LMOD1    | -6.54237 |         |         |        | FALSE |
| hsa-miR-378     | MFAP2    | -6.54187 |         |         |        | FALSE |
| hsa-miR-92a-1*  | HEPH     | -6.5412  |         |         |        | FALSE |
| hsa-miR-30d*    | NID2     | -6.54114 |         |         |        | FALSE |
| hsa-miR-3127-5p | ACTA2    | -6.54067 |         |         |        | FALSE |
| hsa-miR-200b*   | CRISPLD2 | -6.54044 |         |         |        | FALSE |
| hsa-miR-20a     | BNC2     | -6.54023 |         | -0.401  | 0.9851 | FALSE |
| hsa-miR-148b    | FLNA     | -6.5402  |         |         |        | FALSE |
| hsa-miR-218     | USP43    | -6.5402  |         |         |        | FALSE |
| hsa-miR-651     | TIMP3    | -6.53998 |         |         |        | FALSE |
| hsa-miR-125a-5p | CDCA8    | -6.53881 |         |         |        | FALSE |
| hsa-miR-379     | ANKZF1   | -6.53823 |         |         |        | FALSE |
| hsa-miR-151-5p  | C19orf33 | -6.53794 |         |         |        | FALSE |
| hsa-miR-30a*    | GTSE1    | -6.53776 |         |         |        | FALSE |
| hsa-miR-7-1*    | VCAN     | -6.53755 |         |         |        | FALSE |
| hsa-miR-93      | MSRB3    | -6.53755 |         | -0.038  |        | FALSE |
| hsa-miR-200c    | PTRF     | -6.53738 |         |         |        | FALSE |
| hsa-miR-142-5p  | EPN2     | -6.5373  |         |         |        | FALSE |
| hsa-miR-17      | C1QTNF7  | -6.53688 |         | -0.0793 |        | FALSE |
| hsa-miR-652     | POSTN    | -6.53651 |         |         |        | FALSE |
| hsa-miR-1226    | ZCCHC24  | -6.53629 |         |         |        | FALSE |
| hsa-miR-194*    | CDH11    | -6.53596 |         |         |        | FALSE |
| hsa-miR-942     | ECM2     | -6.53592 |         |         |        | FALSE |
| hsa-miR-30e     | RRM2     | -6.53561 | -0.8766 | -0.303  |        | FALSE |
| hsa-miR-32      | MATN3    | -6.53556 |         |         |        | FALSE |
| hsa-miR-450a    | CREBRF   | -6.53475 |         |         |        | FALSE |

|                 |          |          |         |        |        |       |
|-----------------|----------|----------|---------|--------|--------|-------|
| hsa-miR-15a     | DACT3    | -6.53474 |         |        |        | FALSE |
| hsa-miR-200c    | OLFML2B  | -6.53422 |         |        |        | FALSE |
| hsa-miR-3614-5p | LTBP3    | -6.53372 |         |        |        | FALSE |
| hsa-miR-16-2*   | COL14A1  | -6.5335  |         |        |        | FALSE |
| hsa-miR-130b*   | SLC16A4  | -6.53344 |         |        |        | FALSE |
| hsa-miR-671-5p  | LDB2     | -6.53319 |         |        |        | FALSE |
| hsa-miR-200c    | PLAC9    | -6.53316 |         |        |        | FALSE |
| hsa-miR-181a-2* | BIRC3    | -6.53299 |         |        |        | FALSE |
| hsa-miR-15b*    | AOC3     | -6.5325  |         |        |        | FALSE |
| hsa-miR-1180    | LMOD1    | -6.53179 |         |        |        | FALSE |
| hsa-miR-191     | MFAP5    | -6.53124 |         |        |        | FALSE |
| hsa-miR-29b-1*  | ELN      | -6.53015 |         |        |        | FALSE |
| hsa-let-7e      | MRPL54   | -6.53003 |         |        |        | FALSE |
| hsa-miR-16      | ZNF423   | -6.52985 | -0.1597 | -0.205 | 0.7657 | FALSE |
| hsa-miR-194     | FLNA     | -6.52972 |         |        |        | FALSE |
| hsa-miR-29c*    | CHSY1    | -6.52956 |         |        |        | FALSE |
| hsa-miR-30a*    | CCNF     | -6.52952 |         |        |        | FALSE |
| hsa-miR-21*     | ZNF429   | -6.52851 |         |        |        | FALSE |
| hsa-miR-629     | ISCU     | -6.52797 |         |        |        | FALSE |
| hsa-miR-33a*    | SPARCL1  | -6.52773 |         |        |        | FALSE |
| hsa-miR-135a    | FBN1     | -6.52768 |         |        |        | FALSE |
| hsa-miR-496     | C5orf56  | -6.52745 |         |        |        | FALSE |
| hsa-miR-671-5p  | LMOD1    | -6.52654 |         |        |        | FALSE |
| hsa-miR-154     | NFATC2IP | -6.52632 |         |        |        | FALSE |
| hsa-miR-92a     | LILRA2   | -6.52625 |         |        |        | FALSE |
| hsa-miR-181d    | TMEM87B  | -6.52582 | -2.9272 |        |        | FALSE |
| hsa-miR-17*     | SERTAD1  | -6.52574 |         |        |        | FALSE |
| hsa-miR-101     | ZWINT    | -6.52567 |         |        |        | FALSE |
| hsa-miR-301a    | SELP     | -6.52482 |         |        |        | FALSE |
| hsa-miR-590-5p  | KLF9     | -6.5245  | -0.3651 | -0.227 |        | FALSE |
| hsa-miR-33b     | LHFP     | -6.52399 | -0.164  |        |        | FALSE |
| hsa-miR-19b-1*  | CACNA1C  | -6.52372 |         |        |        | FALSE |
| hsa-miR-30e     | YWHAG    | -6.52334 |         | -0.103 | 0.5101 | FALSE |
| hsa-miR-324-5p  | GAPT     | -6.52332 |         |        |        | FALSE |
| hsa-miR-141*    | EFEMP2   | -6.52251 |         |        |        | FALSE |
| hsa-miR-17*     | POLD4    | -6.52168 |         |        |        | FALSE |
| hsa-miR-26b*    | MS4A2    | -6.52154 |         |        |        | FALSE |
| hsa-miR-30c     | MSRB3    | -6.52153 |         |        |        | FALSE |
| hsa-miR-625     | CACNA1C  | -6.52112 |         |        |        | FALSE |
| hsa-miR-29a     | MAPK6    | -6.521   |         |        |        | FALSE |
| hsa-miR-128     | CSRP1    | -6.52096 |         |        |        | FALSE |
| hsa-miR-301a    | VDR      | -6.51944 |         |        |        | FALSE |
| hsa-miR-194*    | TMEM130  | -6.51902 |         |        |        | FALSE |
| hsa-let-7a-2*   | SMEK1    | -6.51837 |         |        |        | FALSE |
| hsa-miR-22      | TMCO6    | -6.51803 |         |        |        | FALSE |

|                |          |          |         |        |        |       |
|----------------|----------|----------|---------|--------|--------|-------|
| hsa-miR-337-3p | IRF7     | -6.51799 |         |        |        | FALSE |
| hsa-miR-652    | COL1A2   | -6.51795 |         |        |        | FALSE |
| hsa-miR-323-3p | TAPBP    | -6.51709 |         |        |        | FALSE |
| hsa-miR-192*   | CDH11    | -6.51683 |         |        |        | FALSE |
| hsa-miR-3615   | ELN      | -6.51627 |         |        |        | FALSE |
| hsa-miR-7-1*   | PDLIM3   | -6.51611 |         |        |        | FALSE |
| hsa-miR-200a*  | LEPRE1   | -6.51553 |         |        |        | FALSE |
| hsa-miR-16-2*  | A2M      | -6.51533 |         |        |        | FALSE |
| hsa-miR-425    | KIAA0430 | -6.51457 | -0.8436 | -0.294 | 0.2652 | FALSE |
| hsa-miR-101    | FAM64A   | -6.51342 |         |        |        | FALSE |
| hsa-miR-92a    | GIMAP1   | -6.51326 |         |        |        | FALSE |
| hsa-miR-30d*   | TGFB11   | -6.51273 |         |        |        | FALSE |
| hsa-miR-210    | FXYD1    | -6.51241 |         |        |        | FALSE |
| hsa-miR-425*   | TGFB11   | -6.51222 |         |        |        | FALSE |
| hsa-miR-19b    | DAB2     | -6.51179 |         |        |        | FALSE |
| hsa-miR-192    | COL3A1   | -6.51169 | -0.1009 | -0.168 | 0.0897 | FALSE |
| hsa-miR-30c-2* | MYBL2    | -6.51052 |         |        |        | FALSE |
| hsa-miR-215    | DACT3    | -6.51005 |         |        |        | FALSE |
| hsa-miR-148b   | COL1A1   | -6.50993 |         |        |        | FALSE |
| hsa-miR-16-2*  | MS4A2    | -6.50978 |         |        |        | FALSE |
| hsa-miR-7-1*   | CNRIP1   | -6.50958 |         |        |        | FALSE |
| hsa-miR-502-3p | TGFB11   | -6.50848 |         |        |        | FALSE |
| hsa-miR-1301   | MS4A2    | -6.50838 |         |        |        | FALSE |
| hsa-miR-1307   | SGCA     | -6.50673 |         |        |        | FALSE |
| hsa-miR-32     | MRVI1    | -6.50604 |         |        |        | FALSE |
| hsa-miR-769-5p | LRP10    | -6.50487 |         |        |        | FALSE |
| hsa-miR-15b    | ASPN     | -6.50433 |         |        |        | FALSE |
| hsa-miR-200c*  | RASL12   | -6.50337 |         |        |        | FALSE |
| hsa-miR-423-3p | SORCS2   | -6.50242 |         |        |        | FALSE |
| hsa-miR-340*   | PLEC     | -6.50215 |         |        |        | FALSE |
| hsa-miR-200b*  | LIX1L    | -6.5016  |         |        |        | FALSE |
| hsa-miR-141    | ZNF521   | -6.50076 | -0.223  |        |        | FALSE |
| hsa-miR-210    | TIE1     | -6.50019 |         |        |        | FALSE |
| hsa-miR-212    | ZBTB7C   | -6.49947 |         |        |        | FALSE |
| hsa-miR-186    | TGFB11   | -6.49938 |         |        |        | FALSE |
| hsa-miR-1307   | PRELP    | -6.49937 |         |        |        | FALSE |
| hsa-miR-93*    | MSRB3    | -6.49912 |         |        |        | FALSE |
| hsa-miR-19b-1* | SMPD1    | -6.49883 |         |        |        | FALSE |
| hsa-miR-200c*  | FBXL7    | -6.49646 |         |        |        | FALSE |
| hsa-miR-331-3p | C10orf10 | -6.49642 |         |        |        | FALSE |
| hsa-miR-194*   | LEPRE1   | -6.49641 |         |        |        | FALSE |
| hsa-miR-625*   | SEC31A   | -6.4964  |         |        |        | FALSE |
| hsa-miR-30d*   | SPOCK1   | -6.49608 |         |        |        | FALSE |
| hsa-miR-192*   | SFRP4    | -6.49505 |         |        |        | FALSE |
| hsa-miR-30e    | ZNF697   | -6.49402 |         |        |        | FALSE |

|                 |          |          |         |        |        |       |
|-----------------|----------|----------|---------|--------|--------|-------|
| hsa-miR-423-3p  | MYL9     | -6.4934  |         |        |        | FALSE |
| hsa-miR-200b    | CERCAM   | -6.49338 |         |        |        | FALSE |
| hsa-miR-139-3p  | DTYMK    | -6.49275 |         |        |        | FALSE |
| hsa-miR-589*    | TNS1     | -6.49266 |         |        |        | FALSE |
| hsa-miR-16-2*   | CNRIP1   | -6.49256 |         |        |        | FALSE |
| hsa-miR-192     | VCAN     | -6.49187 | -0.6643 | -0.209 | 0.067  | FALSE |
| hsa-miR-503     | MYH14    | -6.49165 |         |        |        | FALSE |
| hsa-miR-7-1*    | RECK     | -6.49142 |         |        |        | FALSE |
| hsa-miR-210     | SYNPO2   | -6.49117 |         |        |        | FALSE |
| hsa-miR-200b    | TIMP3    | -6.49075 |         |        |        | FALSE |
| hsa-miR-29b-1*  | MAGI2    | -6.49043 |         |        |        | FALSE |
| hsa-miR-576-5p  | CPA3     | -6.49036 |         |        |        | FALSE |
| hsa-miR-17*     | ENPP5    | -6.49026 |         |        |        | FALSE |
| hsa-miR-93*     | DCN      | -6.49016 |         |        |        | FALSE |
| hsa-miR-200c    | GLIPR1   | -6.49003 |         |        |        | FALSE |
| hsa-miR-30d*    | C1QTNF6  | -6.49002 |         |        |        | FALSE |
| hsa-miR-29c     | CKAP2L   | -6.48962 |         |        |        | FALSE |
| hsa-miR-17*     | ATP6V0E1 | -6.48916 |         |        |        | FALSE |
| hsa-miR-15b*    | BGN      | -6.4889  |         |        |        | FALSE |
| hsa-miR-101     | ERO1L    | -6.48814 | -0.2006 | -0.157 |        | FALSE |
| hsa-miR-889     | ULK3     | -6.48809 |         |        |        | FALSE |
| hsa-miR-29c     | SKA3     | -6.48807 |         |        |        | FALSE |
| hsa-miR-148b    | EHD2     | -6.48776 |         |        |        | FALSE |
| hsa-miR-130b    | KIF13B   | -6.48759 |         |        |        | FALSE |
| hsa-miR-191*    | PLSCR4   | -6.4873  |         |        |        | FALSE |
| hsa-miR-222     | SNX4     | -6.48729 | -2.3548 | -0.88  | 0.2208 | FALSE |
| hsa-miR-106b    | MRVI1    | -6.48719 |         | -0.059 |        | FALSE |
| hsa-miR-188-5p  | SSPN     | -6.48718 |         |        |        | FALSE |
| hsa-miR-193b*   | HLF      | -6.48684 |         |        |        | FALSE |
| hsa-miR-33b     | MYH11    | -6.48637 |         |        |        | FALSE |
| hsa-miR-17      | LRP10    | -6.48622 |         |        |        | FALSE |
| hsa-miR-96      | BNC2     | -6.48572 |         | -0.286 | 0.9954 | FALSE |
| hsa-miR-429     | JAM2     | -6.48484 |         |        |        | FALSE |
| hsa-miR-22      | IL17RB   | -6.48469 |         |        |        | FALSE |
| hsa-miR-139-3p  | SLC25A11 | -6.48463 |         |        |        | FALSE |
| hsa-miR-30b     | FAM26E   | -6.48421 | -0.8267 | -0.461 |        | FALSE |
| hsa-miR-200c*   | LEPRE1   | -6.48401 |         |        |        | FALSE |
| hsa-miR-200c    | COL5A2   | -6.48401 | -0.1308 | -0.131 |        | FALSE |
| hsa-miR-19b-1*  | NNMT     | -6.4837  |         |        |        | FALSE |
| hsa-miR-200c    | NNMT     | -6.48365 |         |        |        | FALSE |
| hsa-miR-200c*   | COL3A1   | -6.48359 |         |        |        | FALSE |
| hsa-miR-3065-3p | OLFML2B  | -6.48268 |         |        |        | FALSE |
| hsa-miR-92a     | MS4A6A   | -6.48267 |         |        |        | FALSE |
| hsa-miR-454     | GALNTL2  | -6.48254 |         | -0.177 |        | FALSE |
| hsa-miR-769-5p  | TCIRG1   | -6.48203 |         |        |        | FALSE |

|                 |          |          |         |        |        |       |
|-----------------|----------|----------|---------|--------|--------|-------|
| hsa-miR-484     | CBX7     | -6.48186 |         |        |        | FALSE |
| hsa-miR-15b*    | CNRIP1   | -6.4818  |         |        |        | FALSE |
| hsa-miR-671-5p  | C1QTNF7  | -6.48166 |         |        |        | FALSE |
| hsa-miR-200b*   | DYSF     | -6.48149 |         |        |        | FALSE |
| hsa-miR-192*    | NXN      | -6.4811  |         |        |        | FALSE |
| hsa-miR-629     | ATP1A2   | -6.48108 |         |        |        | FALSE |
| hsa-miR-192     | LRRC15   | -6.48078 |         |        |        | FALSE |
| hsa-miR-191     | PTRF     | -6.48052 |         |        |        | FALSE |
| hsa-miR-141*    | LGALS1   | -6.48047 |         |        |        | FALSE |
| hsa-miR-3200-3p | CARD16   | -6.48008 |         |        |        | FALSE |
| hsa-miR-532-5p  | COL5A1   | -6.48001 |         |        |        | FALSE |
| hsa-miR-194*    | ITGA11   | -6.47957 |         |        |        | FALSE |
| hsa-miR-99a*    | TMEM87B  | -6.47928 |         |        |        | FALSE |
| hsa-miR-20a     | MFSD1    | -6.47927 |         |        |        | FALSE |
| hsa-miR-200a    | EDNRA    | -6.47906 |         |        |        | FALSE |
| hsa-miR-92a     | ALOX5AP  | -6.47873 |         |        |        | FALSE |
| hsa-miR-103a-2* | CACNA1C  | -6.47853 |         |        |        | FALSE |
| hsa-miR-3615    | CYS1     | -6.47748 |         |        |        | FALSE |
| hsa-miR-942     | HSPB7    | -6.47719 |         |        |        | FALSE |
| hsa-miR-210     | ELN      | -6.4771  |         |        |        | FALSE |
| hsa-miR-134     | C6orf136 | -6.47695 |         |        |        | FALSE |
| hsa-miR-92a     | B3GALT4  | -6.47692 |         |        |        | FALSE |
| hsa-miR-19b-1*  | FAM198B  | -6.47673 |         |        |        | FALSE |
| hsa-miR-18a*    | PBXIP1   | -6.47667 |         |        |        | FALSE |
| hsa-miR-29b-1*  | OGN      | -6.4753  |         |        |        | FALSE |
| hsa-miR-744     | PSME1    | -6.47488 |         |        |        | FALSE |
| hsa-miR-30a     | FAM64A   | -6.47451 |         |        |        | FALSE |
| hsa-miR-152     | ANKZF1   | -6.47165 |         |        |        | FALSE |
| hsa-miR-148b    | FN1      | -6.47124 |         |        |        | FALSE |
| hsa-miR-16      | BNC2     | -6.47121 | -0.462  |        | 0.1568 | FALSE |
| hsa-miR-15b*    | LRRC32   | -6.47109 |         |        |        | FALSE |
| hsa-miR-30d*    | VEGFC    | -6.4709  |         |        |        | FALSE |
| hsa-miR-148b    | THBS2    | -6.4706  |         |        |        | FALSE |
| hsa-miR-192     | RECK     | -6.47032 |         |        |        | FALSE |
| hsa-miR-1226    | MMP28    | -6.46978 |         |        |        | FALSE |
| hsa-miR-942     | MFAP4    | -6.46966 |         |        |        | FALSE |
| hsa-miR-141     | LRRC32   | -6.46893 |         |        |        | FALSE |
| hsa-miR-497     | CCNB1    | -6.46826 | -0.1898 |        |        | FALSE |
| hsa-miR-26a     | COPS2    | -6.46771 | -0.1632 | -0.214 | 0.5951 | FALSE |
| hsa-miR-3200-3p | NNMT     | -6.4677  |         |        |        | FALSE |
| hsa-miR-18a     | MFSD1    | -6.46735 |         |        |        | FALSE |
| hsa-miR-96      | ARHGAP31 | -6.46723 |         |        |        | FALSE |
| hsa-miR-32      | SPON1    | -6.46722 |         |        |        | FALSE |
| hsa-miR-130a    | MAP7     | -6.46705 | -0.7096 | -0.242 | 0.3494 | FALSE |
| hsa-miR-93      | MGP      | -6.46576 |         |        |        | FALSE |



|                 |          |          |         |         |        |       |
|-----------------|----------|----------|---------|---------|--------|-------|
| hsa-miR-29c     | CDC25A   | -6.46561 |         |         |        | FALSE |
| hsa-miR-30c     | FAM26E   | -6.46537 | -0.8267 | -0.461  |        | FALSE |
| hsa-miR-200b*   | NEDD4    | -6.46499 |         |         |        | FALSE |
| hsa-miR-17*     | CD63     | -6.46496 |         |         |        | FALSE |
| hsa-miR-200b    | ARHGAP31 | -6.46489 |         |         |        | FALSE |
| hsa-miR-200b*   | MYL9     | -6.46363 |         |         |        | FALSE |
| hsa-miR-106a    | ANTXR2   | -6.46327 |         |         |        | FALSE |
| hsa-miR-323-3p  | PRKCD    | -6.46316 |         |         |        | FALSE |
| hsa-miR-20a     | LRP10    | -6.4627  |         |         |        | FALSE |
| hsa-miR-192     | TWIST1   | -6.46258 |         |         |        | FALSE |
| hsa-miR-29c     | SKP2     | -6.46232 |         |         |        | FALSE |
| hsa-miR-744     | PSMB10   | -6.46148 |         |         |        | FALSE |
| hsa-miR-29c     | PRC1     | -6.46128 |         |         |        | FALSE |
| hsa-miR-18a     | MFAP4    | -6.46109 | -0.2238 | -0.067  |        | FALSE |
| hsa-miR-19b-1*  | AOC3     | -6.46064 |         |         |        | FALSE |
| hsa-miR-143     | ZBTB48   | -6.46031 |         |         |        | FALSE |
| hsa-miR-454     | CXorf36  | -6.45985 |         |         |        | FALSE |
| hsa-miR-7-1*    | COL10A1  | -6.45948 |         |         |        | FALSE |
| hsa-miR-500b    | KCND2    | -6.45916 |         |         |        | FALSE |
| hsa-miR-577     | LATS2    | -6.45891 |         |         |        | FALSE |
| hsa-miR-200a*   | TRPC1    | -6.45877 |         |         |        | FALSE |
| hsa-miR-192*    | FILIP1L  | -6.45866 |         |         |        | FALSE |
| hsa-miR-30a     | CDC7     | -6.45854 | -1.126  | -0.6501 | 0.1905 | FALSE |
| hsa-miR-200c*   | SNED1    | -6.45779 |         |         |        | FALSE |
| hsa-miR-141     | COL5A2   | -6.45748 | -0.1583 |         |        | FALSE |
| hsa-miR-125a-5p | HN1      | -6.45736 |         |         |        | FALSE |
| hsa-miR-107     | DPT      | -6.45695 |         |         |        | FALSE |
| hsa-miR-106b*   | DSTN     | -6.45667 |         |         |        | FALSE |
| hsa-let-7e*     | CCL4     | -6.45589 |         |         |        | FALSE |
| hsa-miR-15b*    | HPGDS    | -6.45575 |         |         |        | FALSE |
| hsa-miR-493     | TMEM80   | -6.45568 |         |         |        | FALSE |
| hsa-miR-141*    | CFL2     | -6.45555 |         |         |        | FALSE |
| hsa-miR-362-5p  | COL5A1   | -6.45542 |         |         |        | FALSE |
| hsa-miR-200c*   | PDGFRB   | -6.45516 |         |         |        | FALSE |
| hsa-miR-326     | RPL13A   | -6.45425 |         |         |        | FALSE |
| hsa-miR-29c     | AURKB    | -6.45355 |         |         |        | FALSE |
| hsa-miR-889     | PSD4     | -6.45255 |         |         |        | FALSE |
| hsa-miR-20a*    | A2M      | -6.45222 |         |         |        | FALSE |
| hsa-miR-29a     | CTDSPL2  | -6.45102 | -0.815  | -0.228  | 0.2618 | FALSE |
| hsa-miR-425*    | LHFP     | -6.45058 |         |         |        | FALSE |
| hsa-miR-411     | PSD4     | -6.4503  |         |         |        | FALSE |
| hsa-miR-101     | CENPE    | -6.44983 |         |         |        | FALSE |
| hsa-miR-7-1*    | COL3A1   | -6.44944 |         |         |        | FALSE |
| hsa-miR-345     | MS4A2    | -6.44934 |         |         |        | FALSE |
| hsa-miR-99a     | SLC26A6  | -6.44845 |         |         |        | FALSE |

|                |          |          |         |         |        |       |
|----------------|----------|----------|---------|---------|--------|-------|
| hsa-miR-181c*  | BLVRB    | -6.44817 |         |         |        | FALSE |
| hsa-miR-744*   | SYNPO2   | -6.44817 |         |         |        | FALSE |
| hsa-miR-148b   | GLT8D2   | -6.44796 |         |         |        | FALSE |
| hsa-miR-15b    | DACT3    | -6.44654 |         |         |        | FALSE |
| hsa-miR-93     | LRP10    | -6.4465  |         |         |        | FALSE |
| hsa-miR-200b*  | MFGE8    | -6.44622 |         |         |        | FALSE |
| hsa-miR-128    | STOM     | -6.44602 | -0.8976 | -0.3412 |        | FALSE |
| hsa-miR-16     | HEPH     | -6.4457  |         |         |        | FALSE |
| hsa-miR-15b*   | CNN1     | -6.44477 |         |         |        | FALSE |
| hsa-miR-22*    | N4BP2    | -6.44444 |         |         |        | FALSE |
| hsa-miR-92a    | TMBIM4   | -6.44431 |         |         |        | FALSE |
| hsa-miR-423-3p | PDE1A    | -6.44413 |         |         |        | FALSE |
| hsa-miR-3170   | C7       | -6.44403 |         |         |        | FALSE |
| hsa-miR-141*   | HTRA1    | -6.44366 |         |         |        | FALSE |
| hsa-let-7g     | FAP      | -6.44357 |         |         |        | FALSE |
| hsa-miR-629*   | CNN1     | -6.44344 |         |         |        | FALSE |
| hsa-miR-7-1*   | LHFP     | -6.44314 |         |         |        | FALSE |
| hsa-miR-30d*   | LRRC15   | -6.44283 |         |         |        | FALSE |
| hsa-miR-141*   | GLIPR1   | -6.44237 |         |         |        | FALSE |
| hsa-miR-30c    | HTRA3    | -6.44231 | -0.2738 | -0.122  | 0.8382 | FALSE |
| hsa-miR-92b    | POLD4    | -6.44167 |         |         |        | FALSE |
| hsa-miR-22*    | PCMTD2   | -6.44146 |         |         |        | FALSE |
| hsa-miR-769-5p | NEXN     | -6.44122 |         |         |        | FALSE |
| hsa-miR-22*    | FBXO21   | -6.44113 |         |         |        | FALSE |
| hsa-miR-18b    | MSRB3    | -6.44103 | -0.6903 |         |        | FALSE |
| hsa-miR-502-3p | MMP11    | -6.44046 |         |         |        | FALSE |
| hsa-miR-652    | SFRP2    | -6.43924 |         |         |        | FALSE |
| hsa-miR-361-5p | ANXA2    | -6.43921 |         |         |        | FALSE |
| hsa-miR-18a    | RBM43    | -6.43895 |         |         |        | FALSE |
| hsa-miR-20a    | RCAN2    | -6.43887 |         |         |        | FALSE |
| hsa-miR-130b   | TMC4     | -6.43851 |         |         |        | FALSE |
| hsa-miR-194*   | FILIP1L  | -6.43727 |         |         |        | FALSE |
| hsa-miR-16     | DIXDC1   | -6.43707 | -0.2073 | -0.32   | 0.907  | FALSE |
| hsa-miR-432    | CRB3     | -6.43643 |         |         |        | FALSE |
| hsa-miR-192*   | TGFB3    | -6.4364  |         |         |        | FALSE |
| hsa-miR-532-5p | COL5A2   | -6.43625 |         |         |        | FALSE |
| hsa-miR-200b   | HTRA1    | -6.43568 |         |         |        | FALSE |
| hsa-miR-328    | NNMT     | -6.4353  |         |         |        | FALSE |
| hsa-miR-423-3p | GNG11    | -6.43497 |         |         |        | FALSE |
| hsa-miR-222*   | MYH11    | -6.43495 |         |         |        | FALSE |
| hsa-miR-328    | S100P    | -6.43475 |         |         |        | FALSE |
| hsa-miR-590-5p | JAM3     | -6.43469 |         |         |        | FALSE |
| hsa-miR-421    | CBX7     | -6.43439 |         |         |        | FALSE |
| hsa-miR-192    | SFRP2    | -6.43397 |         |         |        | FALSE |
| hsa-miR-379    | CATSPER2 | -6.43363 |         |         |        | FALSE |

|                 |          |          |         |        |        |       |
|-----------------|----------|----------|---------|--------|--------|-------|
| hsa-miR-423-3p  | DES      | -6.43328 |         |        |        | FALSE |
| hsa-miR-425     | TGFB111  | -6.43328 |         |        |        | FALSE |
| hsa-miR-125a-5p | CDCA5    | -6.43313 |         |        |        | FALSE |
| hsa-miR-30e*    | TMEM158  | -6.43273 |         |        |        | FALSE |
| hsa-miR-22*     | C2CD5    | -6.43273 |         |        |        | FALSE |
| hsa-miR-19b-1*  | MXRA8    | -6.43268 |         |        |        | FALSE |
| hsa-miR-106b*   | LMBRD1   | -6.43267 |         |        |        | FALSE |
| hsa-miR-33b     | JAM3     | -6.43155 |         |        |        | FALSE |
| hsa-miR-101     | YWHAG    | -6.43127 | -0.788  | -0.159 |        | FALSE |
| hsa-miR-186     | PLN      | -6.43066 |         |        |        | FALSE |
| hsa-miR-532-3p  | PLN      | -6.43022 |         |        |        | FALSE |
| hsa-miR-937     | LDLRAD4  | -6.4298  |         |        |        | FALSE |
| hsa-miR-192*    | NEXN     | -6.42974 |         |        |        | FALSE |
| hsa-miR-101     | CKAP2L   | -6.42812 |         |        |        | FALSE |
| hsa-miR-203     | COQ10A   | -6.42806 | -0.3857 | -0.205 | 0.0895 | FALSE |
| hsa-miR-671-5p  | JAM2     | -6.42793 |         |        |        | FALSE |
| hsa-miR-92a     | GGT5     | -6.42787 |         |        |        | FALSE |
| hsa-miR-200a    | MEDAG    | -6.42667 |         |        |        | FALSE |
| hsa-miR-27b     | PDIA6    | -6.42651 |         |        |        | FALSE |
| hsa-miR-15b     | MSRB3    | -6.42635 |         |        |        | FALSE |
| hsa-miR-106a    | RNASEL   | -6.42621 | -1.1659 | -0.451 |        | FALSE |
| hsa-miR-32      | SSPN     | -6.42603 |         |        |        | FALSE |
| hsa-miR-92a     | OCEL1    | -6.42585 |         |        |        | FALSE |
| hsa-miR-532-5p  | ADAM12   | -6.42536 |         |        |        | FALSE |
| hsa-miR-15b     | BNC2     | -6.42515 |         | -0.462 | 0.1568 | FALSE |
| hsa-miR-511     | ZNF396   | -6.42461 |         |        |        | FALSE |
| hsa-miR-29c*    | COL4A1   | -6.42445 |         |        |        | FALSE |
| hsa-miR-30b*    | LEPRE1   | -6.42436 |         |        |        | FALSE |
| hsa-miR-660     | GREM1    | -6.42417 |         |        |        | FALSE |
| hsa-miR-200c    | ENPP2    | -6.4241  | -0.3486 |        |        | FALSE |
| hsa-miR-379     | RASSF7   | -6.42381 |         |        |        | FALSE |
| hsa-miR-20b     | PTRF     | -6.42345 |         | -0.043 |        | FALSE |
| hsa-miR-376c    | KIAA1468 | -6.42322 |         |        |        | FALSE |
| hsa-miR-93      | KLF2     | -6.42313 |         |        |        | FALSE |
| hsa-miR-29c     | NRAS     | -6.42253 | -0.3922 |        |        | FALSE |
| hsa-miR-629*    | TNS1     | -6.42245 |         |        |        | FALSE |
| hsa-miR-1307    | RAMP2    | -6.42179 |         |        |        | FALSE |
| hsa-miR-210     | ATP1A2   | -6.42168 |         |        |        | FALSE |
| hsa-miR-194*    | COL8A2   | -6.42144 |         |        |        | FALSE |
| hsa-miR-106b    | PODN     | -6.42118 |         | -0.101 |        | FALSE |
| hsa-miR-200b    | MEDAG    | -6.41966 |         |        |        | FALSE |
| hsa-miR-149     | RNASE6   | -6.41962 |         |        |        | FALSE |
| hsa-miR-362-5p  | COL7A1   | -6.41937 |         |        |        | FALSE |
| hsa-miR-192     | MMP14    | -6.41885 |         | -0.08  | 0.0866 | FALSE |
| hsa-miR-937     | ERMAP    | -6.41855 |         |        |        | FALSE |

|                 |          |          |         |         |        |       |
|-----------------|----------|----------|---------|---------|--------|-------|
| hsa-miR-3614-5p | COL10A1  | -6.41817 |         |         |        | FALSE |
| hsa-miR-200a    | HEG1     | -6.41793 |         | -0.192  | 0.1667 | FALSE |
| hsa-miR-200c*   | GNG2     | -6.41777 |         |         |        | FALSE |
| hsa-miR-192*    | PCOLCE   | -6.41766 |         |         |        | FALSE |
| hsa-miR-134     | HDHD3    | -6.41744 |         |         |        | FALSE |
| hsa-miR-22*     | ZKSCAN1  | -6.41703 |         |         |        | FALSE |
| hsa-miR-532-5p  | ITGA11   | -6.41691 |         |         |        | FALSE |
| hsa-miR-433     | TRADD    | -6.41663 |         |         |        | FALSE |
| hsa-miR-651     | CLEC14A  | -6.41643 |         |         |        | FALSE |
| hsa-miR-96      | CXorf36  | -6.41616 |         | -0.082  |        | FALSE |
| hsa-miR-200a    | JAZF1    | -6.41615 | -1.111  | -0.584  | 0.258  | FALSE |
| hsa-miR-744*    | ZCCHC24  | -6.41577 |         |         |        | FALSE |
| hsa-miR-127-3p  | GAS8     | -6.41518 |         |         |        | FALSE |
| hsa-miR-106b    | OMD      | -6.4149  |         |         |        | FALSE |
| hsa-miR-19b     | MMP2     | -6.41463 |         |         |        | FALSE |
| hsa-miR-323b-3p | CBX7     | -6.41444 |         |         |        | FALSE |
| hsa-miR-31*     | SCUBE2   | -6.41433 |         |         |        | FALSE |
| hsa-miR-29b-2*  | GREM1    | -6.41412 |         |         |        | FALSE |
| hsa-miR-15b*    | JAM3     | -6.41374 |         |         |        | FALSE |
| hsa-miR-186     | GLT8D2   | -6.4136  |         |         |        | FALSE |
| hsa-miR-182     | DAB2     | -6.41337 |         | -0.089  |        | FALSE |
| hsa-miR-29c     | STMN1    | -6.41229 |         |         |        | FALSE |
| hsa-miR-19a     | KIAA0513 | -6.41182 |         | -0.126  | 0.1711 | FALSE |
| hsa-miR-93*     | PLN      | -6.41176 |         |         |        | FALSE |
| hsa-miR-652     | BGN      | -6.41163 |         |         |        | FALSE |
| hsa-miR-22      | ALKBH2   | -6.41159 |         |         |        | FALSE |
| hsa-miR-223     | GKAP1    | -6.40966 |         |         |        | FALSE |
| hsa-miR-106b    | CREBL2   | -6.40958 |         |         |        | FALSE |
| hsa-miR-96      | ETS1     | -6.40879 | -0.1393 |         |        | FALSE |
| hsa-miR-185     | DMPK     | -6.40843 |         |         |        | FALSE |
| hsa-miR-148a*   | MTMR9    | -6.40798 |         |         |        | FALSE |
| hsa-miR-590-5p  | MS4A2    | -6.4068  |         | -0.0777 | 0.0574 | FALSE |
| hsa-miR-15b     | GLIS1    | -6.40592 |         |         |        | FALSE |
| hsa-miR-18a     | KIAA0247 | -6.40587 |         | -0.064  | 0.1175 | FALSE |
| hsa-miR-24      | ALDH6A1  | -6.40534 |         |         |        | FALSE |
| hsa-miR-148b    | MFAP5    | -6.40479 |         |         |        | FALSE |
| hsa-miR-339-3p  | MMP14    | -6.40428 |         |         |        | FALSE |
| hsa-miR-3065-5p | SULF1    | -6.40399 |         |         |        | FALSE |
| hsa-miR-532-5p  | COL10A1  | -6.40374 |         |         |        | FALSE |
| hsa-miR-192     | GAS6     | -6.40317 |         |         |        | FALSE |
| hsa-miR-181d    | NQO1     | -6.40305 |         |         |        | FALSE |
| hsa-miR-30a*    | NUF2     | -6.40286 |         |         |        | FALSE |
| hsa-miR-186     | MXRA5    | -6.40271 |         |         |        | FALSE |
| hsa-miR-30e*    | COL6A2   | -6.40224 |         |         |        | FALSE |
| hsa-miR-424*    | N4BP2L1  | -6.40198 |         |         |        | FALSE |

|                 |         |          |         |        |        |       |
|-----------------|---------|----------|---------|--------|--------|-------|
| hsa-miR-101     | PGAM1   | -6.40142 |         |        |        | FALSE |
| hsa-miR-142-3p  | USP47   | -6.40072 |         |        |        | FALSE |
| hsa-miR-200c*   | FILIP1L | -6.40072 |         |        |        | FALSE |
| hsa-let-7f-2*   | FBN1    | -6.40036 |         |        |        | FALSE |
| hsa-miR-1307    | TPT1    | -6.39954 |         |        |        | FALSE |
| hsa-miR-93      | CSRP1   | -6.39953 |         |        |        | FALSE |
| hsa-miR-3615    | PDLIM3  | -6.39935 |         |        |        | FALSE |
| hsa-miR-32      | RAB31   | -6.39929 |         |        |        | FALSE |
| hsa-miR-33a*    | TYROBP  | -6.39883 |         |        |        | FALSE |
| hsa-miR-409-3p  | ECHDC2  | -6.39832 |         |        |        | FALSE |
| hsa-miR-29c*    | GPR161  | -6.39793 |         |        |        | FALSE |
| hsa-miR-31*     | ZNF652  | -6.39789 |         |        |        | FALSE |
| hsa-miR-181c    | CENPM   | -6.39783 |         |        |        | FALSE |
| hsa-miR-379     | CLASRP  | -6.39744 |         |        |        | FALSE |
| hsa-miR-20a*    | MMP2    | -6.39686 |         |        |        | FALSE |
| hsa-miR-19b-1*  | MYL9    | -6.3964  |         |        |        | FALSE |
| hsa-miR-30c-2*  | CDKN3   | -6.39619 |         |        |        | FALSE |
| hsa-miR-576-5p  | SGCD    | -6.39618 |         |        |        | FALSE |
| hsa-miR-324-5p  | TNS1    | -6.39601 |         |        |        | FALSE |
| hsa-miR-505     | ECM2    | -6.39576 |         |        |        | FALSE |
| hsa-miR-194     | FHL3    | -6.39542 |         |        |        | FALSE |
| hsa-miR-101     | LEPRE1  | -6.39542 |         |        |        | FALSE |
| hsa-miR-106b*   | RBKS    | -6.39523 |         |        |        | FALSE |
| hsa-miR-15b     | GALNTL2 | -6.39513 |         |        |        | FALSE |
| hsa-miR-182     | MEF2C   | -6.39509 | -0.633  | -0.388 |        | FALSE |
| hsa-miR-200c*   | OLFML1  | -6.39482 |         |        |        | FALSE |
| hsa-miR-145*    | FANCA   | -6.39475 |         |        |        | FALSE |
| hsa-miR-200a    | KCTD12  | -6.39471 | -0.5483 | -0.278 | 0.3149 | FALSE |
| hsa-miR-130b    | TNS1    | -6.39464 |         |        |        | FALSE |
| hsa-miR-18b     | MMP2    | -6.39435 |         |        |        | FALSE |
| hsa-miR-194     | CALD1   | -6.3943  |         |        |        | FALSE |
| hsa-miR-92a     | CYB5R1  | -6.39397 | -0.4155 | -0.197 |        | FALSE |
| hsa-miR-223     | ZNF14   | -6.39348 |         |        |        | FALSE |
| hsa-miR-15b*    | LHFP    | -6.39346 |         |        |        | FALSE |
| hsa-miR-194     | IKBIP   | -6.39341 |         |        |        | FALSE |
| hsa-miR-16-1*   | HEPH    | -6.39336 |         |        |        | FALSE |
| hsa-miR-34c-5p  | DNMT3B  | -6.39304 |         |        |        | FALSE |
| hsa-miR-128     | FAP     | -6.39271 |         |        |        | FALSE |
| hsa-miR-200b    | JAM3    | -6.39219 |         | -0.085 |        | FALSE |
| hsa-miR-192     | ANTXR1  | -6.39195 |         |        |        | FALSE |
| hsa-miR-598     | SQRDL   | -6.3916  |         |        |        | FALSE |
| hsa-miR-3127-5p | ANGPTL1 | -6.39132 |         |        |        | FALSE |
| hsa-miR-423-3p  | CSRP1   | -6.39112 |         |        |        | FALSE |
| hsa-miR-200c    | HTRA3   | -6.39087 |         |        |        | FALSE |
| hsa-miR-20a     | GALNT5  | -6.39069 |         |        |        | FALSE |

|                 |          |          |         |         |       |
|-----------------|----------|----------|---------|---------|-------|
| hsa-miR-326     | CHCHD5   | -6.38983 |         |         | FALSE |
| hsa-miR-30d*    | CDH11    | -6.38976 |         |         | FALSE |
| hsa-miR-144     | ITGBL1   | -6.38972 |         |         | FALSE |
| hsa-miR-200b    | PMP22    | -6.38958 | -1.1518 | -0.273  | FALSE |
| hsa-miR-942     | HTRA3    | -6.38919 |         |         | FALSE |
| hsa-miR-199b-3p | INADL    | -6.38892 |         |         | FALSE |
| hsa-miR-33a*    | CCDC80   | -6.38886 |         |         | FALSE |
| hsa-miR-590-5p  | ARHGAP1  | -6.38853 |         |         | FALSE |
| hsa-miR-30d     | CKAP4    | -6.38829 | -0.1709 |         | FALSE |
| hsa-miR-148a*   | PNMA1    | -6.38767 |         |         | FALSE |
| hsa-miR-17      | CAST     | -6.3872  |         |         | FALSE |
| hsa-miR-30d     | PPAPDC1A | -6.38694 |         |         | FALSE |
| hsa-miR-15b     | SNED1    | -6.38672 |         |         | FALSE |
| hsa-miR-150     | ENO2     | -6.38667 |         |         | FALSE |
| hsa-miR-21      | ZNF10    | -6.38646 | -0.9264 | -0.496  | FALSE |
| hsa-miR-324-3p  | ODF3B    | -6.38615 |         |         | FALSE |
| hsa-miR-652     | PRKG1    | -6.38591 |         |         | FALSE |
| hsa-miR-30c     | VCAN     | -6.38527 | -0.125  |         | FALSE |
| hsa-miR-425*    | COL8A2   | -6.38516 |         |         | FALSE |
| hsa-miR-200b*   | F13A1    | -6.38515 |         |         | FALSE |
| hsa-miR-30a     | MCM10    | -6.38505 |         |         | FALSE |
| hsa-miR-20b     | AHNAK2   | -6.3849  |         |         | FALSE |
| hsa-miR-17*     | ZCCHC24  | -6.38477 |         |         | FALSE |
| hsa-miR-92a     | CD53     | -6.38476 |         |         | FALSE |
| hsa-miR-483-3p  | 1-Sep    | -6.38444 |         |         | FALSE |
| hsa-miR-146b-3p | TRPT1    | -6.38368 |         |         | FALSE |
| hsa-miR-577     | OLFML1   | -6.38363 |         |         | FALSE |
| hsa-miR-340     | TGFB1I1  | -6.38357 |         |         | FALSE |
| hsa-miR-432     | C6orf136 | -6.38356 |         |         | FALSE |
| hsa-miR-651     | COL1A2   | -6.38288 |         |         | FALSE |
| hsa-miR-423-3p  | C1QTNF7  | -6.38284 |         |         | FALSE |
| hsa-miR-7-1*    | ISM1     | -6.3827  |         |         | FALSE |
| hsa-miR-93      | C19orf33 | -6.3826  |         |         | FALSE |
| hsa-let-7b      | VPS33A   | -6.38219 | -1.1611 | -0.3645 | FALSE |
| hsa-miR-149     | HLA-DRA  | -6.38218 |         |         | FALSE |
| hsa-miR-210     | CCL19    | -6.38112 |         |         | FALSE |
| hsa-miR-651     | ZFPM2    | -6.38108 |         |         | FALSE |
| hsa-miR-425*    | GPR124   | -6.38105 |         |         | FALSE |
| hsa-miR-32      | COL12A1  | -6.38102 | -0.6933 | -0.213  | FALSE |
| hsa-miR-501-5p  | MSRB3    | -6.38042 |         |         | FALSE |
| hsa-miR-627     | AEBP1    | -6.38022 |         |         | FALSE |
| hsa-miR-30d*    | FBLN1    | -6.38021 |         |         | FALSE |
| hsa-miR-33b     | FHL1     | -6.38008 |         |         | FALSE |
| hsa-miR-410     | ECHDC2   | -6.379   |         |         | FALSE |
| hsa-miR-181d    | HTATIP2  | -6.37893 |         |         | FALSE |

|                |          |          |         |        |       |
|----------------|----------|----------|---------|--------|-------|
| hsa-miR-92a-1* | DACT3    | -6.37888 |         |        | FALSE |
| hsa-miR-331-5p | AOC3     | -6.37879 |         |        | FALSE |
| hsa-miR-301b   | SERPING1 | -6.37716 |         |        | FALSE |
| hsa-miR-20a    | ITM2B    | -6.37709 |         |        | FALSE |
| hsa-miR-17*    | TMBIM6   | -6.37678 |         |        | FALSE |
| hsa-miR-15a    | OGN      | -6.37608 |         |        | FALSE |
| hsa-miR-19a    | BHLHE41  | -6.37586 | -0.1011 |        | FALSE |
| hsa-miR-19b-1* | PLN      | -6.37583 |         |        | FALSE |
| hsa-miR-17     | CX3CL1   | -6.37577 | -0.1238 | -0.144 | FALSE |
| hsa-miR-29c    | KLHL7    | -6.37568 |         |        | FALSE |
| hsa-miR-18a    | BTD      | -6.37559 |         |        | FALSE |
| hsa-miR-181d   | LACTB    | -6.37532 |         |        | FALSE |
| hsa-miR-30a    | MELK     | -6.37455 |         |        | FALSE |
| hsa-miR-30a*   | MELK     | -6.37428 |         |        | FALSE |
| hsa-miR-378*   | CTHRC1   | -6.37402 |         |        | FALSE |
| hsa-miR-26a    | ALDOA    | -6.37386 |         |        | FALSE |
| hsa-miR-889    | TMEM80   | -6.37323 |         |        | FALSE |
| hsa-miR-16-2*  | COL6A3   | -6.37307 |         |        | FALSE |
| hsa-miR-142-5p | KIAA1549 | -6.37304 |         |        | FALSE |
| hsa-miR-431    | PRKCD    | -6.37194 |         |        | FALSE |
| hsa-miR-425*   | IGFBP7   | -6.37189 |         |        | FALSE |
| hsa-miR-181d   | LHFPL2   | -6.37183 |         |        | FALSE |
| hsa-miR-454    | BGN      | -6.37169 |         |        | FALSE |
| hsa-miR-30a*   | PIF1     | -6.37146 |         |        | FALSE |
| hsa-miR-760    | PLD4     | -6.37135 |         |        | FALSE |
| hsa-miR-96     | GNG2     | -6.37111 |         |        | FALSE |
| hsa-miR-101    | PRC1     | -6.3706  | -0.591  |        | FALSE |
| hsa-miR-200b   | DSE      | -6.3687  |         |        | FALSE |
| hsa-miR-148b   | COL10A1  | -6.36867 | -1.1988 | -0.336 | FALSE |
| hsa-miR-425    | TENC1    | -6.3683  |         |        | FALSE |
| hsa-miR-15b*   | SPON1    | -6.36824 |         |        | FALSE |
| hsa-miR-16-2*  | COL3A1   | -6.36821 |         |        | FALSE |
| hsa-miR-32     | PLN      | -6.36658 |         |        | FALSE |
| hsa-miR-128    | PTRF     | -6.36649 |         |        | FALSE |
| hsa-miR-194    | RECK     | -6.36633 |         |        | FALSE |
| hsa-miR-197    | LMOD1    | -6.36625 |         |        | FALSE |
| hsa-miR-30b    | YIPF5    | -6.36601 | -0.6266 | -0.24  | FALSE |
| hsa-miR-1      | STIL     | -6.3657  |         |        | FALSE |
| hsa-miR-30d    | PRRX1    | -6.36538 |         |        | FALSE |
| hsa-miR-326    | RPS18    | -6.36522 |         |        | FALSE |
| hsa-miR-429    | CHSY3    | -6.36501 | -1.0329 | -0.223 | FALSE |
| hsa-miR-532-3p | SFRP2    | -6.36462 |         |        | FALSE |
| hsa-miR-101    | SLC2A1   | -6.36419 |         | -0.121 | FALSE |
| hsa-miR-200c*  | IGFBP7   | -6.36412 |         |        | FALSE |
| hsa-miR-7-1*   | BNC2     | -6.3641  |         |        | FALSE |

|                 |          |          |         |        |        |       |
|-----------------|----------|----------|---------|--------|--------|-------|
| hsa-miR-125a-5p | H2AFZ    | -6.36385 |         |        |        | FALSE |
| hsa-miR-30a*    | KCTD5    | -6.3638  |         |        |        | FALSE |
| hsa-miR-369-3p  | PSD4     | -6.36341 |         |        |        | FALSE |
| hsa-miR-214     | GFM2     | -6.36338 |         |        |        | FALSE |
| hsa-miR-21*     | LYRM9    | -6.36258 |         |        |        | FALSE |
| hsa-miR-18a     | BHLHE41  | -6.36254 |         |        |        | FALSE |
| hsa-miR-192     | SSC5D    | -6.36243 |         |        |        | FALSE |
| hsa-miR-3065-5p | ACTA2    | -6.3621  |         |        |        | FALSE |
| hsa-miR-29c     | PRR11    | -6.36155 |         |        |        | FALSE |
| hsa-miR-30d*    | MXRA8    | -6.36135 |         |        |        | FALSE |
| hsa-miR-26b*    | SGCD     | -6.36126 |         |        |        | FALSE |
| hsa-miR-99a     | ERO1L    | -6.35973 |         |        |        | FALSE |
| hsa-miR-324-3p  | CNRIP1   | -6.35946 |         |        |        | FALSE |
| hsa-miR-592     | SPON1    | -6.35918 |         |        |        | FALSE |
| hsa-miR-9       | SGMS2    | -6.35884 | -0.3292 | -0.465 | 0.9397 | FALSE |
| hsa-miR-200c    | CMTM3    | -6.35883 |         |        |        | FALSE |
| hsa-miR-200a    | CXCL12   | -6.35827 |         | -0.729 | 0.862  | FALSE |
| hsa-miR-340*    | MYH11    | -6.35817 |         |        |        | FALSE |
| hsa-miR-1296    | PLD4     | -6.35813 |         |        |        | FALSE |
| hsa-miR-149     | HLA-DPA1 | -6.3578  |         |        |        | FALSE |
| hsa-miR-429     | SYNE1    | -6.35764 |         |        |        | FALSE |
| hsa-miR-454     | PPAPDC3  | -6.35741 |         |        |        | FALSE |
| hsa-miR-22      | FAM117B  | -6.35719 |         |        |        | FALSE |
| hsa-miR-20a*    | SERPING1 | -6.35712 |         |        |        | FALSE |
| hsa-miR-141*    | CCDC80   | -6.35702 |         |        |        | FALSE |
| hsa-miR-15b     | MMP2     | -6.3565  |         |        |        | FALSE |
| hsa-miR-17*     | OCEL1    | -6.35638 |         |        |        | FALSE |
| hsa-miR-19b     | ECM2     | -6.35561 | -0.9858 | -0.321 | 0.0236 | FALSE |
| hsa-miR-651     | CNN1     | -6.35542 |         |        |        | FALSE |
| hsa-miR-30a*    | ARHGEF39 | -6.35502 |         |        |        | FALSE |
| hsa-miR-152     | WDR6     | -6.3546  |         |        |        | FALSE |
| hsa-miR-18a     | TACC1    | -6.35438 |         |        |        | FALSE |
| hsa-miR-194     | LEPREL2  | -6.35398 |         |        |        | FALSE |
| hsa-miR-22      | MATR3    | -6.35318 |         |        |        | FALSE |
| hsa-miR-1       | L2HGDH   | -6.35309 |         | -0.065 |        | FALSE |
| hsa-miR-148b    | ADAM12   | -6.35292 |         |        |        | FALSE |
| hsa-miR-18a     | MR1      | -6.3528  |         |        |        | FALSE |
| hsa-miR-660     | COL5A1   | -6.35256 |         |        |        | FALSE |
| hsa-miR-125a-5p | FAM54A   | -6.3522  |         |        |        | FALSE |
| hsa-miR-32      | SEC23A   | -6.35187 |         |        |        | FALSE |
| hsa-miR-339-3p  | BNC2     | -6.3517  |         |        |        | FALSE |
| hsa-miR-577     | AEBP1    | -6.35167 |         |        |        | FALSE |
| hsa-miR-96      | TSHZ3    | -6.35165 | -0.8346 |        |        | FALSE |
| hsa-miR-22*     | RBM27    | -6.35156 |         |        |        | FALSE |
| hsa-miR-362-5p  | CALD1    | -6.35121 |         |        |        | FALSE |



|                |          |          |         |         |        |       |
|----------------|----------|----------|---------|---------|--------|-------|
| hsa-miR-142-5p | DET1     | -6.35033 |         |         |        | FALSE |
| hsa-miR-660    | COL11A1  | -6.3496  |         |         |        | FALSE |
| hsa-miR-25     | DCN      | -6.34926 |         |         |        | FALSE |
| hsa-miR-369-5p | KIAA1468 | -6.34924 |         |         |        | FALSE |
| hsa-miR-19b    | CTSA     | -6.34899 |         |         |        | FALSE |
| hsa-miR-32     | LRRC15   | -6.34871 |         |         |        | FALSE |
| hsa-miR-744*   | SERPING1 | -6.34822 |         |         |        | FALSE |
| hsa-miR-340*   | INPP4B   | -6.34796 |         |         |        | FALSE |
| hsa-miR-23a    | TOR2A    | -6.34787 |         |         |        | FALSE |
| hsa-miR-574-3p | PTPRCAP  | -6.34781 |         |         |        | FALSE |
| hsa-miR-200b   | TPM2     | -6.34702 |         |         |        | FALSE |
| hsa-miR-301a   | MMP2     | -6.3467  |         |         |        | FALSE |
| hsa-miR-155    | SHANK2   | -6.34619 | -0.1415 | -0.159  | 0.317  | FALSE |
| hsa-miR-22*    | MGA      | -6.34584 |         |         |        | FALSE |
| hsa-miR-454    | LMOD1    | -6.34527 |         |         |        | FALSE |
| hsa-miR-106b*  | PEX2     | -6.34501 |         |         |        | FALSE |
| hsa-miR-363    | SHC1     | -6.34455 |         |         |        | FALSE |
| hsa-miR-16-2*  | ISM1     | -6.34417 |         |         |        | FALSE |
| hsa-miR-200c*  | CD248    | -6.34386 |         |         |        | FALSE |
| hsa-let-7e*    | GZMB     | -6.34305 |         |         |        | FALSE |
| hsa-miR-183    | BTN3A1   | -6.3427  |         |         |        | FALSE |
| hsa-miR-877    | KCNMB1   | -6.34258 |         |         |        | FALSE |
| hsa-miR-19b    | MS4A2    | -6.34214 |         |         |        | FALSE |
| hsa-miR-141*   | POSTN    | -6.34165 |         |         |        | FALSE |
| hsa-miR-942    | AEBP1    | -6.34163 |         |         |        | FALSE |
| hsa-miR-16-2*  | ADAMTS16 | -6.34158 |         |         |        | FALSE |
| hsa-miR-192    | LEPREL2  | -6.34108 |         |         |        | FALSE |
| hsa-miR-194*   | CPXM1    | -6.34107 |         |         |        | FALSE |
| hsa-miR-93*    | C1S      | -6.34106 |         |         |        | FALSE |
| hsa-miR-660    | PDLIM7   | -6.34105 |         |         |        | FALSE |
| hsa-miR-30a*   | AVEN     | -6.34039 |         |         |        | FALSE |
| hsa-miR-590-5p | A2M      | -6.34031 |         |         |        | FALSE |
| hsa-miR-629    | HSPB7    | -6.34022 |         |         |        | FALSE |
| hsa-miR-1468   | ITGA3    | -6.34013 |         |         |        | FALSE |
| hsa-miR-25     | TMEM59   | -6.33952 |         |         |        | FALSE |
| hsa-miR-30d    | MSANTD3  | -6.33947 |         |         |        | FALSE |
| hsa-miR-19b    | BNC2     | -6.3393  |         | -0.4591 | 0.9422 | FALSE |
| hsa-miR-141    | ANGPTL1  | -6.33909 | -1.1856 | -0.43   |        | FALSE |
| hsa-miR-335*   | TOM1     | -6.33906 |         |         |        | FALSE |
| hsa-miR-671-5p | PTGER3   | -6.33883 |         |         |        | FALSE |
| hsa-miR-532-5p | LRRC15   | -6.33881 |         |         |        | FALSE |
| hsa-miR-660    | ADAMTS12 | -6.3387  |         |         |        | FALSE |
| hsa-miR-30d*   | BNC2     | -6.33854 |         |         |        | FALSE |
| hsa-miR-200b*  | HTRA1    | -6.3385  |         |         |        | FALSE |
| hsa-miR-324-3p | PLD4     | -6.33834 |         |         |        | FALSE |

|                 |          |          |         |         |        |       |
|-----------------|----------|----------|---------|---------|--------|-------|
| hsa-miR-186     | VCAN     | -6.33818 |         |         |        | FALSE |
| hsa-miR-191*    | COPZ2    | -6.3381  |         |         |        | FALSE |
| hsa-miR-629     | C1QTNF7  | -6.33759 |         |         |        | FALSE |
| hsa-miR-335     | LRRC15   | -6.33753 |         |         |        | FALSE |
| hsa-miR-454     | LRP10    | -6.33743 |         |         |        | FALSE |
| hsa-miR-200a    | PCOLCE   | -6.33731 |         |         |        | FALSE |
| hsa-miR-19b     | LRP10    | -6.33672 |         |         |        | FALSE |
| hsa-miR-141     | PDGFRB   | -6.3365  |         | -0.037  | 0.1667 | FALSE |
| hsa-miR-429     | SNAI2    | -6.33612 | -1.0836 | -0.2135 | 0.1792 | FALSE |
| hsa-miR-135a    | NPC1     | -6.33601 | -0.4229 | -0.227  | 0.49   | FALSE |
| hsa-miR-1247    | PRPSAP2  | -6.33499 |         |         |        | FALSE |
| hsa-miR-425*    | BGN      | -6.33497 |         |         |        | FALSE |
| hsa-miR-532-5p  | PRKCDBP  | -6.33465 |         |         |        | FALSE |
| hsa-miR-128     | ITGBL1   | -6.33455 |         |         |        | FALSE |
| hsa-miR-200a*   | ASPN     | -6.33439 |         |         |        | FALSE |
| hsa-miR-3127-5p | PLN      | -6.33438 |         |         |        | FALSE |
| hsa-miR-222     | ZMYM2    | -6.33412 | -0.2431 | -0.128  | 0.3223 | FALSE |
| hsa-miR-335*    | CD86     | -6.33403 |         |         |        | FALSE |
| hsa-miR-19b-1*  | HSPB8    | -6.33399 |         |         |        | FALSE |
| hsa-miR-590-3p  | HSPG2    | -6.33376 |         |         |        | FALSE |
| hsa-miR-339-3p  | ZCCHC24  | -6.33338 |         |         |        | FALSE |
| hsa-miR-200c    | NEXN     | -6.33295 |         |         |        | FALSE |
| hsa-miR-24      | SARM1    | -6.33288 |         |         |        | FALSE |
| hsa-miR-200a    | GALNTL2  | -6.33261 | -0.2085 |         |        | FALSE |
| hsa-miR-192     | PRRX1    | -6.3325  |         |         |        | FALSE |
| hsa-miR-20a*    | KIAA0513 | -6.33157 |         |         |        | FALSE |
| hsa-miR-1296    | GIMAP2   | -6.33156 |         |         |        | FALSE |
| hsa-miR-19a     | GPR124   | -6.33154 |         |         |        | FALSE |
| hsa-miR-29c     | CDCA5    | -6.33141 |         | -0.053  | 0.0109 | FALSE |
| hsa-miR-381     | RASSF7   | -6.33137 |         |         |        | FALSE |
| hsa-miR-33b     | DCHS1    | -6.33133 |         |         |        | FALSE |
| hsa-miR-186     | LMOD1    | -6.3311  |         |         |        | FALSE |
| hsa-miR-101*    | COL5A2   | -6.33106 |         |         |        | FALSE |
| hsa-miR-200b    | SPHK1    | -6.33102 |         |         |        | FALSE |
| hsa-miR-381     | CDK5RAP3 | -6.33073 |         |         |        | FALSE |
| hsa-miR-200a    | TMEM55A  | -6.33061 |         |         |        | FALSE |
| hsa-miR-149     | HLA-DPB1 | -6.3303  |         |         |        | FALSE |
| hsa-miR-214     | COG3     | -6.32996 |         |         |        | FALSE |
| hsa-miR-577     | NEXN     | -6.32972 |         |         |        | FALSE |
| hsa-miR-7-1*    | DACT1    | -6.32947 |         |         |        | FALSE |
| hsa-miR-744*    | PRELP    | -6.32909 |         |         |        | FALSE |
| hsa-miR-505     | ZBTB4    | -6.32873 |         |         |        | FALSE |
| hsa-miR-590-5p  | COL6A3   | -6.32843 |         |         |        | FALSE |
| hsa-miR-15b*    | ABCA6    | -6.32808 |         |         |        | FALSE |
| hsa-miR-148b    | VCAN     | -6.32784 |         |         |        | FALSE |

|                 |          |          |         |        |        |       |
|-----------------|----------|----------|---------|--------|--------|-------|
| hsa-miR-20a     | MSRB3    | -6.32752 |         | -0.038 |        | FALSE |
| hsa-miR-192     | SCARF2   | -6.32741 |         |        |        | FALSE |
| hsa-miR-200a*   | LGALS1   | -6.32736 |         |        |        | FALSE |
| hsa-miR-194*    | TSHZ3    | -6.32716 |         |        |        | FALSE |
| hsa-miR-192     | FBN1     | -6.32694 | -1.5398 |        |        | FALSE |
| hsa-miR-30d     | GAS1     | -6.32687 | -0.1404 |        |        | FALSE |
| hsa-miR-16-2*   | PDGFD    | -6.32678 |         |        |        | FALSE |
| hsa-miR-340*    | ZBTB7A   | -6.32632 |         |        |        | FALSE |
| hsa-miR-590-5p  | CPA3     | -6.32609 | -0.201  |        |        | FALSE |
| hsa-miR-194*    | MAGEL2   | -6.32588 |         |        |        | FALSE |
| hsa-miR-660     | ANTXR1   | -6.32563 |         |        |        | FALSE |
| hsa-miR-25      | HTRA1    | -6.32541 |         |        |        | FALSE |
| hsa-miR-429     | CAV1     | -6.32489 |         | -0.198 |        | FALSE |
| hsa-miR-144     | ITGA11   | -6.32428 |         |        |        | FALSE |
| hsa-miR-194     | VCAN     | -6.32428 |         |        |        | FALSE |
| hsa-let-7e      | SCO2     | -6.32385 |         |        |        | FALSE |
| hsa-miR-200b    | EDNRA    | -6.32379 | -1.1194 | -0.575 | 0.1294 | FALSE |
| hsa-miR-148b    | COL6A1   | -6.32369 |         |        | 0.2219 | FALSE |
| hsa-miR-127-3p  | DOM3Z    | -6.32346 |         |        |        | FALSE |
| hsa-miR-148b    | FRMD6    | -6.32335 |         |        |        | FALSE |
| hsa-miR-19b-1*  | LRRC32   | -6.32254 |         |        |        | FALSE |
| hsa-miR-942     | C16orf45 | -6.32241 |         |        |        | FALSE |
| hsa-miR-200a    | TLN1     | -6.32207 |         |        |        | FALSE |
| hsa-miR-183     | IL10RA   | -6.32157 |         | -0.035 |        | FALSE |
| hsa-miR-194*    | COPZ2    | -6.32066 |         |        |        | FALSE |
| hsa-miR-200b*   | RAB31    | -6.32059 |         |        |        | FALSE |
| hsa-miR-103a-2* | TPSB2    | -6.32057 |         |        |        | FALSE |
| hsa-miR-379     | TMCO6    | -6.32014 |         |        |        | FALSE |
| hsa-miR-18a*    | ZCCHC24  | -6.32006 |         |        |        | FALSE |
| hsa-miR-18b     | DCN      | -6.31986 |         |        |        | FALSE |
| hsa-miR-22*     | KLHL23   | -6.31959 |         |        |        | FALSE |
| hsa-miR-125a-5p | CKAP2L   | -6.31944 |         |        |        | FALSE |
| hsa-miR-660     | SERPINE1 | -6.31928 |         |        |        | FALSE |
| hsa-miR-425*    | GALNTL2  | -6.31924 |         |        |        | FALSE |
| hsa-miR-139-5p  | HELLS    | -6.31863 |         |        |        | FALSE |
| hsa-miR-629     | NDN      | -6.31822 |         |        |        | FALSE |
| hsa-miR-1       | DONSON   | -6.31811 |         |        |        | FALSE |
| hsa-miR-106b*   | TMEM9B   | -6.31773 |         |        |        | FALSE |
| hsa-miR-194     | RAI14    | -6.31724 |         |        |        | FALSE |
| hsa-let-7f-2*   | PRKG1    | -6.31721 |         |        |        | FALSE |
| hsa-miR-29b-1*  | DCHS1    | -6.31703 |         |        |        | FALSE |
| hsa-miR-589*    | PPP1R12B | -6.31698 |         |        |        | FALSE |
| hsa-miR-92a-1*  | ITGBL1   | -6.31666 |         |        |        | FALSE |
| hsa-miR-106b    | PLSCR4   | -6.31659 | -1.9116 | -0.706 |        | FALSE |
| hsa-miR-429     | CCDC80   | -6.31616 |         |        |        | FALSE |

|                |         |          |         |        |        |       |
|----------------|---------|----------|---------|--------|--------|-------|
| hsa-miR-26b*   | VCAN    | -6.31613 |         |        |        | FALSE |
| hsa-miR-101    | SEC61G  | -6.31533 |         |        |        | FALSE |
| hsa-miR-629    | CTSO    | -6.31529 |         |        |        | FALSE |
| hsa-miR-485-3p | HSBP1L1 | -6.31524 |         |        |        | FALSE |
| hsa-miR-93     | CREBL2  | -6.31501 |         |        |        | FALSE |
| hsa-miR-200b   | ANGPTL2 | -6.31467 |         |        |        | FALSE |
| hsa-miR-429    | ANGPTL2 | -6.31444 |         |        |        | FALSE |
| hsa-miR-148b   | HTRA1   | -6.31437 |         |        |        | FALSE |
| hsa-miR-16-2*  | KIF26B  | -6.31375 |         |        |        | FALSE |
| hsa-miR-29c    | CBX1    | -6.31342 |         | -0.108 | 0.8025 | FALSE |
| hsa-miR-502-3p | COL1A2  | -6.31313 |         |        |        | FALSE |
| hsa-let-7a*    | SLAMF7  | -6.31282 |         |        |        | FALSE |
| hsa-miR-590-5p | LMOD1   | -6.31259 |         |        |        | FALSE |
| hsa-miR-425*   | GLT8D2  | -6.31251 |         |        |        | FALSE |
| hsa-miR-20a*   | APOL1   | -6.31215 |         |        |        | FALSE |
| hsa-miR-92a    | ECM2    | -6.31211 |         |        |        | FALSE |
| hsa-miR-200c   | ANTXR1  | -6.31174 |         |        |        | FALSE |
| hsa-miR-182    | BNC2    | -6.31143 |         | -0.551 | 0.9973 | FALSE |
| hsa-miR-186    | COL10A1 | -6.31114 |         |        |        | FALSE |
| hsa-miR-93*    | CTSG    | -6.31114 |         |        |        | FALSE |
| hsa-miR-15b*   | PLSCR4  | -6.31102 |         |        |        | FALSE |
| hsa-miR-200c*  | PBXIP1  | -6.31097 |         |        |        | FALSE |
| hsa-miR-660    | ADAM12  | -6.31067 |         |        |        | FALSE |
| hsa-miR-192    | KIF26B  | -6.31037 |         |        |        | FALSE |
| hsa-miR-15a    | TCEAL7  | -6.31022 |         |        |        | FALSE |
| hsa-miR-502-3p | SFRP2   | -6.31004 |         |        |        | FALSE |
| hsa-miR-141*   | ANTXR2  | -6.30999 |         |        |        | FALSE |
| hsa-miR-409-3p | AMT     | -6.30972 |         |        |        | FALSE |
| hsa-miR-30b    | LOX     | -6.30964 | -1.3789 |        |        | FALSE |
| hsa-miR-194    | FN1     | -6.30951 | -0.1711 |        |        | FALSE |
| hsa-miR-3615   | PGM5    | -6.30948 |         |        |        | FALSE |
| hsa-miR-218    | ZC3H12A | -6.30948 |         |        |        | FALSE |
| hsa-miR-200b*  | LMOD1   | -6.30928 |         |        |        | FALSE |
| hsa-miR-22     | IP6K2   | -6.30905 |         |        |        | FALSE |
| hsa-miR-17*    | NNMT    | -6.30903 |         |        |        | FALSE |
| hsa-miR-629*   | PODN    | -6.30812 |         |        |        | FALSE |
| hsa-miR-93     | HTRA1   | -6.30768 |         |        |        | FALSE |
| hsa-miR-30e*   | P4HA3   | -6.30711 |         |        |        | FALSE |
| hsa-miR-18a    | LDLRAD4 | -6.30705 |         |        |        | FALSE |
| hsa-miR-20a    | HEPH    | -6.30673 | -0.2954 |        |        | FALSE |
| hsa-miR-134    | TMEM80  | -6.3066  |         |        |        | FALSE |
| hsa-miR-1226   | LDLRAD4 | -6.30611 |         |        |        | FALSE |
| hsa-miR-18a    | ITGBL1  | -6.30554 |         |        |        | FALSE |
| hsa-miR-421    | ECM2    | -6.30552 |         |        |        | FALSE |
| hsa-miR-210    | CNRIP1  | -6.30527 | -0.653  | -0.181 | 0.0659 | FALSE |

|                 |          |          |         |         |        |       |
|-----------------|----------|----------|---------|---------|--------|-------|
| hsa-miR-141     | KCTD12   | -6.30498 | -0.5483 | -0.278  | 0.3149 | FALSE |
| hsa-miR-30e*    | TREM1    | -6.30483 |         |         |        | FALSE |
| hsa-miR-199b-5p | FANCA    | -6.30467 | -0.1983 |         |        | FALSE |
| hsa-miR-181d    | WARS     | -6.30425 |         |         |        | FALSE |
| hsa-miR-130b    | CYBRD1   | -6.30393 | -0.5463 | -0.294  |        | FALSE |
| hsa-miR-375     | SEC23A   | -6.30243 | -0.1581 | -0.25   | 0.3843 | FALSE |
| hsa-miR-19b     | ITGBL1   | -6.30172 |         |         |        | FALSE |
| hsa-miR-502-3p  | HTRA3    | -6.30127 |         |         |        | FALSE |
| hsa-miR-16-2*   | IGFBP7   | -6.30122 |         |         |        | FALSE |
| hsa-miR-3200-3p | C19orf33 | -6.30116 |         |         |        | FALSE |
| hsa-miR-200c*   | EDNRA    | -6.30107 |         |         |        | FALSE |
| hsa-miR-210     | SHE      | -6.30093 |         | -0.0742 |        | FALSE |
| hsa-miR-425*    | C1S      | -6.30053 |         |         |        | FALSE |
| hsa-miR-223*    | PRR24    | -6.30026 |         |         |        | FALSE |
| hsa-miR-200b    | MYL9     | -6.29999 |         |         |        | FALSE |
| hsa-miR-101     | CDCA8    | -6.29974 |         |         |        | FALSE |
| hsa-miR-192*    | ISLR     | -6.29927 |         |         |        | FALSE |
| hsa-miR-30d*    | CREB3L1  | -6.2992  |         |         |        | FALSE |
| hsa-miR-16      | COL14A1  | -6.29884 |         |         |        | FALSE |
| hsa-miR-301a    | SYNPO    | -6.2987  |         |         |        | FALSE |
| hsa-miR-200c*   | COL6A1   | -6.29811 |         |         |        | FALSE |
| hsa-miR-25      | KIAA0513 | -6.2981  |         |         |        | FALSE |
| hsa-miR-30a*    | KIF14    | -6.29809 |         |         |        | FALSE |
| hsa-miR-15b*    | MYCT1    | -6.29802 |         |         |        | FALSE |
| hsa-miR-17      | ITM2B    | -6.29781 |         |         |        | FALSE |
| hsa-miR-200b*   | SPARCL1  | -6.29754 |         |         |        | FALSE |
| hsa-miR-7-1*    | ISLR     | -6.29744 |         |         |        | FALSE |
| hsa-miR-15a     | SGCD     | -6.29715 |         | -0.054  | 0.7379 | FALSE |
| hsa-miR-214     | TMEM161B | -6.29684 | -1.5411 | -0.494  | 0.4101 | FALSE |
| hsa-miR-125a-5p | E2F2     | -6.29653 | -0.1129 | -0.1255 | 0.7408 | FALSE |
| hsa-miR-101     | PLK1     | -6.29629 | -0.2427 |         |        | FALSE |
| hsa-miR-192     | JAM3     | -6.2958  |         |         |        | FALSE |
| hsa-miR-200c    | PDE1B    | -6.29555 |         |         |        | FALSE |
| hsa-miR-3677-3p | GLTSCR2  | -6.2953  |         |         |        | FALSE |
| hsa-miR-194*    | PMP22    | -6.2949  |         |         |        | FALSE |
| hsa-miR-651     | SMOC2    | -6.29483 |         |         |        | FALSE |
| hsa-miR-141     | NAP1L3   | -6.29467 | -1.0726 | -0.247  | 0.1675 | FALSE |
| hsa-miR-25      | TGFB1    | -6.29432 |         |         |        | FALSE |
| hsa-miR-577     | PODNL1   | -6.29402 |         |         |        | FALSE |
| hsa-miR-130b*   | CPA3     | -6.29352 |         |         |        | FALSE |
| hsa-miR-32      | GPX8     | -6.2935  | -0.219  |         |        | FALSE |
| hsa-miR-215     | COL12A1  | -6.29348 |         |         |        | FALSE |
| hsa-miR-146b-3p | ZNF446   | -6.29343 |         |         |        | FALSE |
| hsa-miR-101     | SERPINH1 | -6.29342 |         |         |        | FALSE |
| hsa-miR-200b*   | LEPRE1   | -6.29327 |         |         |        | FALSE |

|                |          |          |         |        |        |       |
|----------------|----------|----------|---------|--------|--------|-------|
| hsa-miR-30d    | COL3A1   | -6.29302 |         |        |        | FALSE |
| hsa-miR-16-2*  | DACT3    | -6.29287 |         |        |        | FALSE |
| hsa-miR-1180   | PRELP    | -6.29265 |         |        |        | FALSE |
| hsa-miR-30a    | CASC5    | -6.29253 |         |        |        | FALSE |
| hsa-miR-15b*   | MAMDC2   | -6.29253 |         |        |        | FALSE |
| hsa-miR-1180   | YPEL5    | -6.29224 |         |        |        | FALSE |
| hsa-miR-30d*   | PDLIM7   | -6.29206 |         |        |        | FALSE |
| hsa-miR-22     | TSEN2    | -6.29192 |         |        |        | FALSE |
| hsa-miR-577    | MSRB3    | -6.29173 |         |        |        | FALSE |
| hsa-miR-106b*  | CAPZA2   | -6.29171 |         |        |        | FALSE |
| hsa-miR-103a   | CNN1     | -6.29119 |         |        |        | FALSE |
| hsa-miR-589    | PRELP    | -6.29096 |         |        |        | FALSE |
| hsa-miR-590-5p | OGN      | -6.29001 |         |        |        | FALSE |
| hsa-miR-200a*  | SHISA4   | -6.28972 |         |        |        | FALSE |
| hsa-miR-181c   | ERO1L    | -6.28934 | -1.5237 | -0.227 |        | FALSE |
| hsa-miR-200a*  | NID1     | -6.28885 |         |        |        | FALSE |
| hsa-miR-148b   | PLAU     | -6.28859 |         |        |        | FALSE |
| hsa-miR-429    | FCGR2A   | -6.2885  |         |        |        | FALSE |
| hsa-miR-183    | MYO1F    | -6.28848 |         |        |        | FALSE |
| hsa-miR-92a-1* | SGCD     | -6.28829 |         |        |        | FALSE |
| hsa-miR-324-5p | MVP      | -6.28814 |         |        |        | FALSE |
| hsa-miR-133b   | PAICS    | -6.28797 |         |        |        | FALSE |
| hsa-miR-141*   | NID2     | -6.28792 |         |        |        | FALSE |
| hsa-miR-432    | PSME1    | -6.28789 |         |        |        | FALSE |
| hsa-miR-576-5p | OGN      | -6.28769 |         |        |        | FALSE |
| hsa-let-7a     | CDC34    | -6.28736 | -0.193  | -0.383 | 0.9954 | FALSE |
| hsa-miR-22*    | LRBA     | -6.28729 |         |        |        | FALSE |
| hsa-miR-192    | LMOD1    | -6.28721 |         |        |        | FALSE |
| hsa-miR-93*    | LMOD1    | -6.28641 |         |        |        | FALSE |
| hsa-miR-191*   | TGFB1I1  | -6.2848  |         |        |        | FALSE |
| hsa-miR-339-3p | TIMP2    | -6.2848  |         |        |        | FALSE |
| hsa-miR-181d   | PGAM1    | -6.28468 |         | -0.07  |        | FALSE |
| hsa-miR-32     | COL15A1  | -6.2846  |         |        |        | FALSE |
| hsa-miR-101    | BZW1     | -6.2846  | -0.4446 | -0.231 | 0.308  | FALSE |
| hsa-miR-454    | KIAA1462 | -6.2839  | -0.4462 | -0.173 | 0.9009 | FALSE |
| hsa-miR-500a   | ASPN     | -6.2838  |         |        |        | FALSE |
| hsa-miR-200a   | FHL3     | -6.28369 |         |        |        | FALSE |
| hsa-miR-576-5p | TNS1     | -6.28366 |         |        |        | FALSE |
| hsa-miR-942    | LRRC32   | -6.28324 |         |        |        | FALSE |
| hsa-miR-16     | FAM198B  | -6.28314 |         |        |        | FALSE |
| hsa-miR-18a    | ZCCHC24  | -6.28285 | -0.283  | -0.223 | 0.2203 | FALSE |
| hsa-miR-200c*  | VSTM4    | -6.28267 |         |        |        | FALSE |
| hsa-miR-20a*   | GBP2     | -6.28238 |         |        |        | FALSE |
| hsa-miR-92a-1* | TIMP2    | -6.28225 |         |        |        | FALSE |
| hsa-miR-106b   | PJA2     | -6.28208 |         |        |        | FALSE |

|                 |           |          |         |         |        |       |
|-----------------|-----------|----------|---------|---------|--------|-------|
| hsa-miR-142-5p  | SRSF8     | -6.28194 |         |         |        | FALSE |
| hsa-miR-577     | RAB31     | -6.28098 |         |         |        | FALSE |
| hsa-miR-19b-1*  | TIMP3     | -6.28094 |         |         |        | FALSE |
| hsa-miR-200b*   | DDR2      | -6.2809  |         |         |        | FALSE |
| hsa-miR-20a     | STOM      | -6.28079 | -0.636  | -0.3745 |        | FALSE |
| hsa-miR-29c     | RAD51     | -6.28068 |         |         |        | FALSE |
| hsa-miR-429     | GAS1      | -6.27998 |         |         |        | FALSE |
| hsa-miR-483-3p  | ITGB7     | -6.27975 |         |         |        | FALSE |
| hsa-miR-107     | PHLDA3    | -6.27899 |         |         |        | FALSE |
| hsa-miR-19b-1*  | AEBP1     | -6.27856 |         |         |        | FALSE |
| hsa-miR-223     | GTF2IRD2B | -6.2785  |         |         |        | FALSE |
| hsa-miR-425*    | CNRIP1    | -6.27841 |         |         |        | FALSE |
| hsa-miR-200a*   | 4-Sep     | -6.27796 |         |         |        | FALSE |
| hsa-miR-222     | KIAA1549  | -6.27785 |         | -0.2297 | 0.0996 | FALSE |
| hsa-miR-423-3p  | TPSAB1    | -6.27768 |         |         |        | FALSE |
| hsa-miR-33a*    | SPON1     | -6.27754 |         |         |        | FALSE |
| hsa-miR-3065-5p | CXCL12    | -6.2771  |         |         |        | FALSE |
| hsa-miR-374b    | BLZF1     | -6.27693 |         |         |        | FALSE |
| hsa-miR-30b*    | ECM2      | -6.27664 |         |         |        | FALSE |
| hsa-miR-15b     | MFAP4     | -6.27643 |         |         |        | FALSE |
| hsa-miR-1307    | RARRES2   | -6.27604 |         |         |        | FALSE |
| hsa-miR-200b    | KCTD12    | -6.27599 | -0.1981 | -0.382  |        | FALSE |
| hsa-miR-125b-2* | RCE1      | -6.27583 |         |         |        | FALSE |
| hsa-miR-30e     | COL5A3    | -6.27582 |         |         |        | FALSE |
| hsa-miR-483-3p  | MVP       | -6.27578 |         |         |        | FALSE |
| hsa-miR-200a    | CDH11     | -6.27573 |         |         |        | FALSE |
| hsa-miR-18b     | SGCD      | -6.27537 |         | -0.1    |        | FALSE |
| hsa-miR-192*    | COL6A1    | -6.27524 |         |         |        | FALSE |
| hsa-miR-200c*   | CXCL12    | -6.27503 |         |         |        | FALSE |
| hsa-miR-98      | KCNK6     | -6.27463 | -0.4465 | -0.207  |        | FALSE |
| hsa-miR-22*     | KIAA1958  | -6.27453 |         |         |        | FALSE |
| hsa-miR-32      | CNN1      | -6.27439 |         |         |        | FALSE |
| hsa-miR-101*    | COL4A1    | -6.27407 |         |         |        | FALSE |
| hsa-miR-193b    | PCMTD2    | -6.27402 |         |         |        | FALSE |
| hsa-miR-3677-3p | CX3CR1    | -6.27336 |         |         |        | FALSE |
| hsa-miR-30d*    | P4HA3     | -6.27311 |         |         |        | FALSE |
| hsa-miR-589     | EAPP      | -6.27301 |         |         |        | FALSE |
| hsa-miR-3615    | INMT      | -6.27299 |         |         |        | FALSE |
| hsa-miR-181c    | EIF5A     | -6.27297 |         |         |        | FALSE |
| hsa-miR-142-5p  | FNBP1L    | -6.2724  |         |         |        | FALSE |
| hsa-miR-29c*    | ARSI      | -6.27234 |         |         |        | FALSE |
| hsa-miR-2355-3p | PBX1      | -6.27231 |         |         |        | FALSE |
| hsa-miR-200b    | BGN       | -6.27191 |         |         |        | FALSE |
| hsa-miR-194     | DACT3     | -6.27142 |         |         |        | FALSE |
| hsa-miR-18b     | ITGBL1    | -6.27056 |         |         |        | FALSE |

|                 |          |          |         |        |        |
|-----------------|----------|----------|---------|--------|--------|
| hsa-miR-32      | SEMA3C   | -6.27048 | -0.4044 |        | FALSE  |
| hsa-miR-1180    | HLA-DMB  | -6.27004 |         |        | FALSE  |
| hsa-miR-18a*    | OMD      | -6.26993 |         |        | FALSE  |
| hsa-miR-29c     | NCAPG2   | -6.26978 |         |        | FALSE  |
| hsa-miR-194*    | COL6A1   | -6.26958 |         |        | FALSE  |
| hsa-miR-181d    | ERO1L    | -6.26929 | -0.8561 | -0.227 | FALSE  |
| hsa-miR-629     | IGFBP7   | -6.26889 |         |        | FALSE  |
| hsa-miR-589     | LMOD1    | -6.26871 |         |        | FALSE  |
| hsa-miR-16-2*   | PRELP    | -6.26867 |         |        | FALSE  |
| hsa-miR-340*    | VDR      | -6.26785 |         |        | FALSE  |
| hsa-miR-22*     | NCOA2    | -6.2672  |         |        | FALSE  |
| hsa-miR-651     | CDH11    | -6.26705 |         |        | FALSE  |
| hsa-miR-106b*   | POLD4    | -6.26632 |         |        | FALSE  |
| hsa-miR-30c     | ASPN     | -6.26592 |         |        | FALSE  |
| hsa-miR-331-5p  | CACNA1C  | -6.26578 |         |        | FALSE  |
| hsa-miR-942     | RCAN2    | -6.26518 |         |        | FALSE  |
| hsa-miR-616*    | MS4A2    | -6.26505 |         |        | FALSE  |
| hsa-miR-30e*    | COL10A1  | -6.265   |         |        | FALSE  |
| hsa-miR-93*     | NNMT     | -6.26495 |         |        | FALSE  |
| hsa-miR-101     | PSMD14   | -6.26397 |         |        | FALSE  |
| hsa-miR-410     | C6orf136 | -6.26382 |         |        | FALSE  |
| hsa-miR-141*    | SNAI2    | -6.26363 |         |        | FALSE  |
| hsa-miR-877     | FCER1A   | -6.26344 |         |        | FALSE  |
| hsa-miR-154*    | PRKCD    | -6.26305 |         |        | FALSE  |
| hsa-miR-183     | ARHGAP15 | -6.26298 |         |        | FALSE  |
| hsa-miR-379     | PSD4     | -6.26257 |         |        | FALSE  |
| hsa-miR-200a*   | PRRX1    | -6.26256 |         |        | FALSE  |
| hsa-miR-127-3p  | ACADVL   | -6.26251 |         |        | FALSE  |
| hsa-miR-200c*   | FERMT2   | -6.2625  |         |        | FALSE  |
| hsa-miR-299-5p  | PTPN6    | -6.26246 |         |        | FALSE  |
| hsa-miR-192     | RUNX1    | -6.26246 |         | -0.101 | 0.2187 |
| hsa-miR-378*    | LEPRE1   | -6.26244 |         |        | FALSE  |
| hsa-miR-432     | HSBP1L1  | -6.26216 |         |        | FALSE  |
| hsa-miR-532-3p  | PDLIM7   | -6.26212 |         |        | FALSE  |
| hsa-miR-181c    | AURKA    | -6.2621  |         |        | FALSE  |
| hsa-miR-200c*   | PLAC9    | -6.26193 |         |        | FALSE  |
| hsa-miR-215     | PRICKLE1 | -6.26189 |         |        | FALSE  |
| hsa-miR-3200-3p | ANXA8L2  | -6.26124 |         |        | FALSE  |
| hsa-miR-20a     | ITGB5    | -6.26087 |         |        | FALSE  |
| hsa-miR-330-3p  | ASPN     | -6.26037 |         |        | FALSE  |
| hsa-miR-942     | GLT8D2   | -6.26029 |         |        | FALSE  |
| hsa-miR-7-1*    | COL6A2   | -6.26014 |         |        | FALSE  |
| hsa-miR-429     | DPYD     | -6.2601  |         |        | FALSE  |
| hsa-miR-223*    | FIZ1     | -6.25994 |         |        | FALSE  |
| hsa-miR-31*     | TRIM24   | -6.25977 |         |        | FALSE  |



|                 |          |          |         |         |        |       |
|-----------------|----------|----------|---------|---------|--------|-------|
| hsa-miR-3613-5p | AHNAK    | -6.25898 |         |         |        | FALSE |
| hsa-miR-17      | SERPING1 | -6.25892 |         |         |        | FALSE |
| hsa-miR-301b    | FYB      | -6.25868 |         |         |        | FALSE |
| hsa-miR-30d*    | LUM      | -6.25851 |         |         |        | FALSE |
| hsa-miR-21*     | CLUL1    | -6.2578  |         |         |        | FALSE |
| hsa-miR-197     | CNN1     | -6.25766 |         |         |        | FALSE |
| hsa-let-7f-2*   | BMPR2    | -6.25741 |         |         |        | FALSE |
| hsa-miR-200c*   | MFRP     | -6.25734 |         |         |        | FALSE |
| hsa-miR-92a     | CNN1     | -6.25721 |         |         |        | FALSE |
| hsa-miR-200b    | GREM1    | -6.25683 | -0.2744 | -0.154  |        | FALSE |
| hsa-miR-130b*   | ZCCHC24  | -6.25659 |         |         |        | FALSE |
| hsa-miR-22*     | ATE1     | -6.25593 |         |         |        | FALSE |
| hsa-miR-454     | SSC5D    | -6.25569 |         |         |        | FALSE |
| hsa-miR-17*     | SYTL2    | -6.25514 |         |         |        | FALSE |
| hsa-miR-19b     | PBXIP1   | -6.25478 |         |         |        | FALSE |
| hsa-miR-200b    | C1QTNF6  | -6.25436 |         |         |        | FALSE |
| hsa-miR-19b-1*  | MGP      | -6.25422 |         |         |        | FALSE |
| hsa-miR-181c    | TUBA1B   | -6.25415 |         |         |        | FALSE |
| hsa-miR-92a     | LRP10    | -6.25395 |         |         |        | FALSE |
| hsa-miR-200c    | IKBIP    | -6.25364 |         |         |        | FALSE |
| hsa-miR-660     | NBL1     | -6.25358 |         |         |        | FALSE |
| hsa-miR-92a     | HPGDS    | -6.25354 |         |         |        | FALSE |
| hsa-miR-92a     | PODN     | -6.25296 |         |         |        | FALSE |
| hsa-miR-30d*    | COL10A1  | -6.25239 |         |         |        | FALSE |
| hsa-miR-125a-5p | CENPA    | -6.25222 |         |         |        | FALSE |
| hsa-miR-103a-2* | TNS1     | -6.25172 |         |         |        | FALSE |
| hsa-miR-15b*    | RANBP3L  | -6.25171 |         |         |        | FALSE |
| hsa-miR-425*    | HSPB7    | -6.25141 |         |         |        | FALSE |
| hsa-miR-16-2*   | FCER1A   | -6.25133 |         |         |        | FALSE |
| hsa-miR-16-2*   | VGLL3    | -6.25109 |         |         |        | FALSE |
| hsa-miR-144*    | CORIN    | -6.25081 |         |         |        | FALSE |
| hsa-miR-150     | PRPSAP2  | -6.25056 |         |         |        | FALSE |
| hsa-miR-1307    | TENC1    | -6.25037 |         |         |        | FALSE |
| hsa-miR-423-3p  | LTBP3    | -6.25014 |         |         |        | FALSE |
| hsa-miR-200a    | NEDD4    | -6.24926 |         | -0.14   | 0.109  | FALSE |
| hsa-miR-30d*    | PPAPDC3  | -6.24908 |         |         |        | FALSE |
| hsa-miR-30a     | PRC1     | -6.249   | -0.1635 | -0.158  |        | FALSE |
| hsa-miR-496     | YPEL3    | -6.24869 |         |         |        | FALSE |
| hsa-miR-200a    | THBS1    | -6.24806 | -0.9271 | -0.2985 | 0.1667 | FALSE |
| hsa-miR-26b     | GREM1    | -6.24798 |         |         |        | FALSE |
| hsa-miR-15a     | MRVI1    | -6.24798 |         |         |        | FALSE |
| hsa-miR-128     | MGP      | -6.24791 |         |         |        | FALSE |
| hsa-miR-192*    | COPZ2    | -6.24678 |         |         |        | FALSE |
| hsa-miR-7-1*    | PTGER3   | -6.24671 |         |         |        | FALSE |
| hsa-miR-128     | CBX7     | -6.24636 |         |         |        | FALSE |

|                  |          |          |         |        |        |       |
|------------------|----------|----------|---------|--------|--------|-------|
| hsa-miR-186      | COL5A2   | -6.24624 |         |        |        | FALSE |
| hsa-miR-17       | BNC2     | -6.24578 |         | -0.401 | 0.9851 | FALSE |
| hsa-miR-29a      | YWHAE    | -6.24563 | -0.6837 | -0.183 | 0.6448 | FALSE |
| hsa-miR-326      | RPS10    | -6.2452  |         |        |        | FALSE |
| hsa-miR-210      | PRELP    | -6.24499 |         |        |        | FALSE |
| hsa-miR-18a*     | TNFSF12  | -6.24475 |         |        |        | FALSE |
| hsa-miR-219-1-3p | KCNMB1   | -6.24429 |         |        |        | FALSE |
| hsa-miR-1296     | HLA-DOB  | -6.24389 |         |        |        | FALSE |
| hsa-miR-191*     | PTRF     | -6.24387 |         |        |        | FALSE |
| hsa-miR-625      | HMCN1    | -6.24366 |         |        |        | FALSE |
| hsa-miR-10a*     | CRADD    | -6.24338 |         |        |        | FALSE |
| hsa-miR-99a      | HMMR     | -6.24307 |         |        |        | FALSE |
| hsa-miR-19b-1*   | MYH11    | -6.24258 |         |        |        | FALSE |
| hsa-miR-942      | LHFP     | -6.24246 |         |        |        | FALSE |
| hsa-miR-629*     | SORBS1   | -6.24243 |         |        |        | FALSE |
| hsa-miR-93       | NBL1     | -6.24222 | -0.3571 | -0.268 | 0.9478 | FALSE |
| hsa-miR-30e*     | THBS2    | -6.24208 |         |        |        | FALSE |
| hsa-miR-651      | OMD      | -6.24188 |         |        |        | FALSE |
| hsa-miR-18b      | PRKG1    | -6.24178 |         |        |        | FALSE |
| hsa-miR-19a      | TXNIP    | -6.24161 |         |        |        | FALSE |
| hsa-miR-125a-5p  | ARHGAP11 | -6.24143 |         |        |        | FALSE |
| hsa-miR-106a     | MACF1    | -6.24119 | -0.4242 |        |        | FALSE |
| hsa-miR-196b     | MVP      | -6.24108 |         |        |        | FALSE |
| hsa-miR-194      | CERCAM   | -6.24107 |         |        |        | FALSE |
| hsa-miR-30a*     | KIF2C    | -6.24106 |         |        |        | FALSE |
| hsa-miR-19b-1*   | LHFP     | -6.24061 |         |        |        | FALSE |
| hsa-miR-32       | ANGPTL2  | -6.24061 | -0.1616 | -0.155 | 0.767  | FALSE |
| hsa-miR-191      | CCDC80   | -6.24057 |         |        |        | FALSE |
| hsa-miR-654-3p   | HDHD3    | -6.24046 |         |        |        | FALSE |
| hsa-miR-22*      | PUM1     | -6.23974 |         |        |        | FALSE |
| hsa-miR-200b     | TGFB1    | -6.23932 |         |        |        | FALSE |
| hsa-miR-93       | FIBIN    | -6.23919 | -1.8686 | -0.685 |        | FALSE |
| hsa-miR-328      | RPS9     | -6.23911 |         |        |        | FALSE |
| hsa-miR-200c*    | FAP      | -6.23909 |         |        |        | FALSE |
| hsa-miR-654-5p   | TRADD    | -6.23909 |         |        |        | FALSE |
| hsa-miR-651      | ANGPTL1  | -6.23872 |         |        |        | FALSE |
| hsa-miR-192*     | VCAN     | -6.23826 |         |        |        | FALSE |
| hsa-miR-15b*     | MMP2     | -6.23813 |         |        |        | FALSE |
| hsa-miR-15b      | LRRC17   | -6.23729 | -0.1264 |        |        | FALSE |
| hsa-miR-223*     | ZNF362   | -6.23696 |         |        |        | FALSE |
| hsa-miR-93       | NNMT     | -6.23688 |         |        |        | FALSE |
| hsa-miR-7-1*     | ADAMTS16 | -6.23631 |         |        |        | FALSE |
| hsa-miR-181c*    | S100A14  | -6.236   |         |        |        | FALSE |
| hsa-miR-20a      | COPZ2    | -6.23599 |         |        |        | FALSE |
| hsa-miR-760      | MMP28    | -6.23587 |         |        |        | FALSE |

|                 |          |          |         |        |        |       |
|-----------------|----------|----------|---------|--------|--------|-------|
| hsa-miR-200b*   | FLI1     | -6.23552 |         |        |        | FALSE |
| hsa-miR-141*    | KDELC1   | -6.23543 |         |        |        | FALSE |
| hsa-miR-409-3p  | NFATC2IP | -6.23459 |         |        |        | FALSE |
| hsa-miR-106b    | CBX7     | -6.23411 |         | -0.062 |        | FALSE |
| hsa-miR-15b     | MYL3     | -6.23409 |         |        |        | FALSE |
| hsa-miR-200c*   | MRVI1    | -6.234   |         |        |        | FALSE |
| hsa-miR-30a*    | DLGAP5   | -6.23326 |         |        |        | FALSE |
| hsa-miR-429     | MMP2     | -6.23287 |         |        |        | FALSE |
| hsa-miR-1307    | NAALADL1 | -6.23186 |         |        |        | FALSE |
| hsa-miR-191*    | HTRA3    | -6.2314  |         |        |        | FALSE |
| hsa-miR-16      | KIF26B   | -6.23132 |         |        |        | FALSE |
| hsa-miR-29a     | ZNF627   | -6.23131 |         |        |        | FALSE |
| hsa-miR-1296    | CD48     | -6.23088 |         |        |        | FALSE |
| hsa-miR-16      | TMEM47   | -6.23044 | -0.1807 | -0.177 |        | FALSE |
| hsa-miR-577     | RHOJ     | -6.23041 |         |        |        | FALSE |
| hsa-miR-181c    | TPI1     | -6.23002 |         |        |        | FALSE |
| hsa-miR-101     | NCAPG    | -6.22975 |         |        |        | FALSE |
| hsa-miR-181c*   | CDCP1    | -6.22954 |         |        |        | FALSE |
| hsa-miR-192*    | MXRA8    | -6.22899 |         |        |        | FALSE |
| hsa-miR-22*     | BRPF3    | -6.22876 |         |        |        | FALSE |
| hsa-miR-22*     | BRD3     | -6.22854 |         |        |        | FALSE |
| hsa-miR-339-3p  | CNN1     | -6.22842 |         |        |        | FALSE |
| hsa-miR-128     | DCN      | -6.22838 |         |        |        | FALSE |
| hsa-miR-127-3p  | ANKZF1   | -6.22773 |         |        |        | FALSE |
| hsa-miR-3200-3p | LST1     | -6.22734 |         |        |        | FALSE |
| hsa-miR-204     | ADAM8    | -6.2271  |         |        |        | FALSE |
| hsa-let-7g      | ADAMTS12 | -6.22705 |         |        |        | FALSE |
| hsa-miR-3200-3p | CLEC2B   | -6.22663 |         |        |        | FALSE |
| hsa-miR-16      | GPR124   | -6.22653 | -0.13   | -0.189 | 0.6855 | FALSE |
| hsa-miR-339-5p  | MS4A2    | -6.22649 |         |        |        | FALSE |
| hsa-miR-194     | FBN1     | -6.22643 | -0.1372 | -0.205 |        | FALSE |
| hsa-miR-301a    | MRVI1    | -6.22618 |         |        |        | FALSE |
| hsa-miR-1226    | HNMT     | -6.22614 |         |        |        | FALSE |
| hsa-miR-145     | CENPK    | -6.22603 | -0.1001 |        |        | FALSE |
| hsa-miR-937     | C1QTNF7  | -6.22537 |         |        |        | FALSE |
| hsa-miR-21      | NSMCE4A  | -6.22503 |         |        |        | FALSE |
| hsa-miR-125a-5p | POLE2    | -6.22451 |         |        |        | FALSE |
| hsa-miR-30b*    | COL6A2   | -6.22381 |         |        |        | FALSE |
| hsa-miR-182     | LY96     | -6.2236  |         |        |        | FALSE |
| hsa-miR-1296    | HCST     | -6.22335 |         |        |        | FALSE |
| hsa-miR-33b     | HMCN1    | -6.2229  |         |        |        | FALSE |
| hsa-miR-200a    | LHFP     | -6.22272 | -2.3459 | -0.663 | 0.3113 | FALSE |
| hsa-miR-29b     | ARHGAP28 | -6.22244 |         |        |        | FALSE |
| hsa-miR-181a-2* | ISG20    | -6.22229 |         |        |        | FALSE |
| hsa-miR-96      | FAM20A   | -6.22216 |         |        |        | FALSE |

|                 |          |          |         |        |        |       |
|-----------------|----------|----------|---------|--------|--------|-------|
| hsa-miR-194*    | RCN3     | -6.22204 |         |        |        | FALSE |
| hsa-miR-942     | MMP2     | -6.2219  |         |        |        | FALSE |
| hsa-miR-30b*    | PDLIM3   | -6.22147 |         |        |        | FALSE |
| hsa-miR-200b*   | ARSI     | -6.22128 |         |        |        | FALSE |
| hsa-miR-200c    | FIBIN    | -6.22119 | -0.2072 | -0.186 |        | FALSE |
| hsa-miR-7-1*    | COL8A2   | -6.22067 |         |        |        | FALSE |
| hsa-miR-210     | CD22     | -6.22025 | -0.1377 | -0.102 | 0.0659 | FALSE |
| hsa-miR-200c*   | PDLIM3   | -6.21999 |         |        |        | FALSE |
| hsa-miR-200b    | GALNTL2  | -6.21979 |         |        |        | FALSE |
| hsa-miR-200a    | GPX8     | -6.21934 |         |        |        | FALSE |
| hsa-miR-7-1*    | NEXN     | -6.21871 |         |        |        | FALSE |
| hsa-miR-423-3p  | TAGLN    | -6.21808 |         |        |        | FALSE |
| hsa-miR-181a-2* | SLAMF7   | -6.21806 |         |        |        | FALSE |
| hsa-miR-20a*    | MS4A2    | -6.21687 |         |        |        | FALSE |
| hsa-miR-182     | GIMAP8   | -6.21685 | -1.0623 | -0.354 |        | FALSE |
| hsa-miR-1226    | ECM2     | -6.21607 |         |        |        | FALSE |
| hsa-miR-423-3p  | FILIP1L  | -6.21594 |         |        |        | FALSE |
| hsa-miR-410     | NFATC2IP | -6.21587 |         |        |        | FALSE |
| hsa-miR-200b*   | ANGPTL1  | -6.21559 |         |        |        | FALSE |
| hsa-miR-16      | GLT8D2   | -6.21551 |         |        |        | FALSE |
| hsa-miR-326     | RPL27    | -6.21551 |         |        |        | FALSE |
| hsa-miR-200c    | POSTN    | -6.21511 |         |        |        | FALSE |
| hsa-miR-425*    | PLSCR4   | -6.21471 |         |        |        | FALSE |
| hsa-miR-429     | EDNRA    | -6.21425 | -0.6235 | -0.575 | 0.1294 | FALSE |
| hsa-miR-15b*    | CYBRD1   | -6.21421 |         |        |        | FALSE |
| hsa-miR-200c    | FILIP1L  | -6.21397 |         |        |        | FALSE |
| hsa-miR-15b*    | NEGR1    | -6.21377 |         |        |        | FALSE |
| hsa-miR-651     | MEDAG    | -6.21338 |         |        |        | FALSE |
| hsa-miR-29c*    | IGF2BP2  | -6.21271 |         |        |        | FALSE |
| hsa-miR-942     | TNS1     | -6.21246 |         |        |        | FALSE |
| hsa-miR-200c    | QKI      | -6.21211 | -3.5105 | -0.426 | 0.2196 | FALSE |
| hsa-miR-191     | CAV2     | -6.21205 |         |        |        | FALSE |
| hsa-miR-671-5p  | NEGR1    | -6.2119  |         |        |        | FALSE |
| hsa-miR-421     | MRVI1    | -6.21115 |         |        |        | FALSE |
| hsa-miR-200c*   | CTHRC1   | -6.21067 |         |        |        | FALSE |
| hsa-miR-15a     | MSRB3    | -6.21019 |         |        |        | FALSE |
| hsa-miR-200c    | STX2     | -6.21003 |         |        |        | FALSE |
| hsa-miR-130b    | PIK3CG   | -6.20993 |         |        |        | FALSE |
| hsa-miR-22*     | KAT7     | -6.20985 |         |        |        | FALSE |
| hsa-miR-200c*   | FN1      | -6.2097  |         |        |        | FALSE |
| hsa-miR-200c*   | PDE2A    | -6.20898 |         |        |        | FALSE |
| hsa-miR-214*    | TMEM161B | -6.20888 |         |        |        | FALSE |
| hsa-miR-181c*   | CCL5     | -6.20867 |         |        |        | FALSE |
| hsa-miR-20a*    | SMPD1    | -6.2084  |         |        |        | FALSE |
| hsa-miR-15b     | ITGA11   | -6.20754 |         |        |        | FALSE |

|                 |          |          |         |        |        |       |
|-----------------|----------|----------|---------|--------|--------|-------|
| hsa-miR-191*    | LDLRAD2  | -6.20709 |         |        | FALSE  |       |
| hsa-miR-106b    | COL6A3   | -6.20666 |         |        | FALSE  |       |
| hsa-miR-1180    | PLAC9    | -6.20637 |         |        | FALSE  |       |
| hsa-miR-128     | OMD      | -6.20621 |         |        | FALSE  |       |
| hsa-miR-16-2*   | CYS1     | -6.20569 |         |        | FALSE  |       |
| hsa-miR-106b    | BNC2     | -6.20564 |         | -0.401 | 0.9851 | FALSE |
| hsa-miR-15b*    | ANTXR2   | -6.20554 |         |        | FALSE  |       |
| hsa-miR-625     | CALD1    | -6.20538 |         |        | FALSE  |       |
| hsa-miR-93*     | TPSAB1   | -6.2053  |         |        | FALSE  |       |
| hsa-miR-30d*    | MAP4K4   | -6.20495 |         |        | FALSE  |       |
| hsa-miR-3200-3p | ARHGAP15 | -6.20421 |         |        | FALSE  |       |
| hsa-miR-1301    | FRMD6    | -6.204   |         |        | FALSE  |       |
| hsa-miR-758     | GSTK1    | -6.20382 |         |        | FALSE  |       |
| hsa-miR-29c     | KIF2C    | -6.2036  |         |        | FALSE  |       |
| hsa-miR-3614-5p | FAM168B  | -6.20334 |         |        | FALSE  |       |
| hsa-miR-192     | LEPRE1   | -6.20324 |         |        | FALSE  |       |
| hsa-miR-106b    | DPYD     | -6.20317 | -1.2173 | -0.329 | FALSE  |       |
| hsa-miR-30a*    | KIF4A    | -6.20311 |         |        | FALSE  |       |
| hsa-miR-18b     | SERINC1  | -6.20301 |         |        | FALSE  |       |
| hsa-miR-30d*    | LOX      | -6.20271 |         |        | FALSE  |       |
| hsa-miR-93      | MYL9     | -6.20209 |         |        | FALSE  |       |
| hsa-miR-574-3p  | RPS6     | -6.20196 |         |        | FALSE  |       |
| hsa-miR-30a     | MND1     | -6.20158 | -0.1282 |        | FALSE  |       |
| hsa-miR-203     | MAP3K3   | -6.20156 |         |        | FALSE  |       |
| hsa-miR-192     | TAGLN    | -6.20152 |         |        | FALSE  |       |
| hsa-miR-200a    | KDELC1   | -6.20114 |         |        | FALSE  |       |
| hsa-miR-17      | LDB2     | -6.20104 |         |        | FALSE  |       |
| hsa-miR-200a*   | SEC23A   | -6.20093 |         |        | FALSE  |       |
| hsa-miR-22      | ZCCHC3   | -6.20076 |         | -0.063 | FALSE  |       |
| hsa-miR-192     | MAGEL2   | -6.20053 |         |        | FALSE  |       |
| hsa-miR-92a     | ARHGAP15 | -6.20034 |         |        | FALSE  |       |
| hsa-miR-143     | HOOK2    | -6.20023 |         |        | FALSE  |       |
| hsa-miR-200a*   | DCHS1    | -6.20009 |         |        | FALSE  |       |
| hsa-miR-181d    | ORMDL2   | -6.2     |         |        | FALSE  |       |
| hsa-miR-409-3p  | PSD4     | -6.19942 |         |        | FALSE  |       |
| hsa-miR-92a     | PMP22    | -6.1991  | -0.1658 |        | FALSE  |       |
| hsa-miR-425     | ZBTB4    | -6.19907 |         |        | FALSE  |       |
| hsa-miR-1307    | TMEM204  | -6.19794 |         |        | FALSE  |       |
| hsa-miR-150*    | PEMT     | -6.19756 |         |        | FALSE  |       |
| hsa-let-7a*     | ABCD2    | -6.1973  |         |        | FALSE  |       |
| hsa-miR-20a*    | GIMAP1   | -6.19691 |         |        | FALSE  |       |
| hsa-miR-193b    | RSBN1    | -6.19606 |         |        | FALSE  |       |
| hsa-miR-30e*    | LDHA     | -6.19586 |         |        | FALSE  |       |
| hsa-miR-19b     | OLFML1   | -6.19566 | -0.5528 | -0.308 | FALSE  |       |
| hsa-miR-181c*   | MVP      | -6.19559 |         |        | FALSE  |       |

|                |          |          |         |        |        |       |
|----------------|----------|----------|---------|--------|--------|-------|
| hsa-miR-93*    | MMP2     | -6.19539 |         |        |        | FALSE |
| hsa-miR-33b    | NAP1L3   | -6.19524 | -0.9965 | -0.361 |        | FALSE |
| hsa-miR-30c    | NEXN     | -6.1952  |         | -0.135 |        | FALSE |
| hsa-let-7e*    | ZNF683   | -6.19504 |         |        |        | FALSE |
| hsa-miR-30a*   | NCAPH    | -6.19501 |         |        |        | FALSE |
| hsa-miR-451    | ITGA11   | -6.19501 |         |        |        | FALSE |
| hsa-miR-30a*   | HMGB3    | -6.19474 |         |        |        | FALSE |
| hsa-miR-32     | ITGA11   | -6.19425 |         |        |        | FALSE |
| hsa-miR-30c    | COL10A1  | -6.19388 |         |        |        | FALSE |
| hsa-miR-193b   | EMCN     | -6.19387 |         |        |        | FALSE |
| hsa-miR-30e*   | VCAN     | -6.19367 |         |        |        | FALSE |
| hsa-miR-148b   | COL5A3   | -6.19319 |         |        |        | FALSE |
| hsa-miR-502-3p | C16orf45 | -6.19307 |         |        |        | FALSE |
| hsa-miR-18b    | ZCCHC24  | -6.19258 | -0.283  | -0.223 | 0.2203 | FALSE |
| hsa-miR-192    | ITGA11   | -6.19213 |         |        |        | FALSE |
| hsa-miR-200b   | LOX      | -6.1921  | -3.1506 | -0.445 |        | FALSE |
| hsa-miR-194    | PRICKLE1 | -6.19199 | -0.1452 |        |        | FALSE |
| hsa-miR-17     | PLAC9    | -6.19195 |         |        |        | FALSE |
| hsa-miR-30c    | NID2     | -6.1917  |         | -0.106 | 0.2962 | FALSE |
| hsa-miR-200c*  | VCAN     | -6.19166 |         |        |        | FALSE |
| hsa-miR-200a*  | HEYL     | -6.19141 |         |        |        | FALSE |
| hsa-miR-425    | LMOD1    | -6.19125 |         |        |        | FALSE |
| hsa-miR-151-5p | NNMT     | -6.19081 |         |        |        | FALSE |
| hsa-miR-30e*   | PHLDA2   | -6.19056 |         |        |        | FALSE |
| hsa-miR-30b*   | PDLIM7   | -6.1903  |         |        |        | FALSE |
| hsa-miR-194*   | COL3A1   | -6.1901  |         |        |        | FALSE |
| hsa-miR-30c-2* | ASCL2    | -6.1901  |         |        |        | FALSE |
| hsa-miR-107    | MYL9     | -6.18982 |         |        |        | FALSE |
| hsa-miR-15a    | MGP      | -6.18975 |         |        |        | FALSE |
| hsa-miR-590-5p | MACF1    | -6.18957 |         |        |        | FALSE |
| hsa-miR-214*   | KIAA1731 | -6.1895  |         |        |        | FALSE |
| hsa-miR-194    | TGFB1    | -6.18939 |         |        |        | FALSE |
| hsa-miR-379    | SH2B1    | -6.18938 |         |        |        | FALSE |
| hsa-miR-128    | AMIGO2   | -6.18867 |         |        |        | FALSE |
| hsa-miR-25     | CYB5R1   | -6.18839 | -0.4155 | -0.197 |        | FALSE |
| hsa-miR-30c    | TSHZ3    | -6.1873  | -0.209  |        |        | FALSE |
| hsa-miR-194*   | IGFBP4   | -6.18728 |         |        |        | FALSE |
| hsa-miR-148b   | TPM2     | -6.18695 |         |        |        | FALSE |
| hsa-miR-93*    | CNN1     | -6.18675 |         |        |        | FALSE |
| hsa-miR-760    | SH3BGRL  | -6.18674 |         |        |        | FALSE |
| hsa-miR-141    | CDH11    | -6.18663 |         |        |        | FALSE |
| hsa-miR-101    | FOXO1    | -6.18649 |         |        |        | FALSE |
| hsa-miR-760    | CACNA1C  | -6.18613 |         |        |        | FALSE |
| hsa-miR-1307   | PKIG     | -6.18546 |         |        |        | FALSE |
| hsa-miR-200b*  | QKI      | -6.1851  |         |        |        | FALSE |

|                 |        |          |         |        |        |       |
|-----------------|--------|----------|---------|--------|--------|-------|
| hsa-miR-106b    | OGN    | -6.18509 |         |        |        | FALSE |
| hsa-miR-671-5p  | ECM2   | -6.18452 |         |        |        | FALSE |
| hsa-miR-200a*   | CILP   | -6.18437 |         |        |        | FALSE |
| hsa-miR-141     | TLL1   | -6.18423 |         | -0.176 | 0.1666 | FALSE |
| hsa-miR-454     | IL1R1  | -6.1837  |         |        |        | FALSE |
| hsa-miR-30a     | HMGB3  | -6.18323 |         | -0.159 | 0.8429 | FALSE |
| hsa-miR-3065-5p | MEF2C  | -6.18322 |         |        |        | FALSE |
| hsa-miR-152     | CTC1   | -6.18301 |         |        |        | FALSE |
| hsa-miR-141     | LAMA4  | -6.18279 |         |        |        | FALSE |
| hsa-miR-130b    | TXNIP  | -6.18262 | -0.4373 | -0.208 | 0.3242 | FALSE |
| hsa-miR-30a*    | SAPCD2 | -6.1823  |         |        |        | FALSE |

## **Supplemental Table 2**

Inferred pan-cancer candidate microRNA target interactions supported by literature.



| miRNA        | Gene Symbol | REC score | miRanda-miRSVR score | TargetScan context-score | TargetScan Pct-score | Experimental evidence for target interaction (PMID) | Functional evidence for interaction in cancer (PMID) |
|--------------|-------------|-----------|----------------------|--------------------------|----------------------|-----------------------------------------------------|------------------------------------------------------|
| hsa-miR-429  | ZEB1        | -10.82    | -5.43                | -0.79                    | 0.95                 | 18411277, 19854497                                  | 19854497                                             |
| hsa-miR-106b | TGFBR2      | -9.80     | -1.52                | -0.65                    | 0.97                 | 17/20/93)                                           | 16461460                                             |
| hsa-miR-93   | TGFBR2      | -6.87     | -1.52                | -0.65                    | 0.97                 | 20371350                                            | 16461460                                             |
| hsa-let-7b   | LIN28B      | -6.71     | -1.18                | -1.12                    | 1.00                 | 17699775                                            | 17699775                                             |
| hsa-miR-21   | PDCD4       | -6.57     | -1.21                | -0.44                    | 0.67                 | 17991735, 17968323, 18270520                        | 17991735, 17968323, 18270520                         |
| hsa-miR-200c | ZEB1        | -10.83    | -5.39                | -0.79                    | 0.95                 | 18381893, 18483486                                  | 18381893, 18483486                                   |
| hsa-miR-200b | ZEB1        | -9.23     | -5.40                | -0.79                    | 0.95                 | 18411277, 19839049                                  | 18411277, 19839049                                   |
| hsa-miR-200b | ZEB2        | -7.20     | -6.73                | -2.13                    | 1.00                 | 18411277, 19839049                                  | 18411277, 19839049                                   |
| hsa-miR-429  | ZEB2        | -9.91     | -6.72                | -2.13                    | 1.00                 | 18411277, 19854497                                  | 18411277, 19854497                                   |
| hsa-miR-200a | ZEB2        | -8.34     | -3.35                | -1.05                    | 0.83                 | 18411277, 19854497, 19931509                        | 18411277, 19854497, 19931509                         |
| hsa-miR-141  | ZEB2        | -7.85     | -3.34                | -1.05                    | 0.83                 | 18925646, 19854497                                  | 18925646, 19854497                                   |
| hsa-miR-200b | ZFPM2       | -9.09     | -2.13                | -0.77                    | 0.80                 | 20005803                                            | 20005803                                             |
| hsa-miR-200c | ZFPM2       | -10.00    | -2.13                | -0.77                    | 0.80                 | 20005803                                            | 20005803                                             |
| hsa-miR-429  | ZFPM2       | -9.26     | -2.11                | -0.77                    | 0.80                 | 20005803                                            | 20005803                                             |
| hsa-miR-16   | RECK        | -6.29     | -1.31                | -0.44                    | 0.88                 | 20154725, 20371350                                  | 20154725                                             |
| hsa-miR-106a | ZBTB4       | -6.80     | -1.67                | -0.54                    | 0.98                 | 21765466, 22343732, 22752225                        | 21765466, 22343732, 22752225                         |
| hsa-miR-106b | ZBTB4       | -7.77     | -1.67                | -0.54                    | 0.98                 | 20371350, 21765466, 22343732, 22752225              | 21765466, 22343732, 22752225                         |

|              |         |        |       |       |      |                                                   |                                      |
|--------------|---------|--------|-------|-------|------|---------------------------------------------------|--------------------------------------|
| hsa-miR-17   | ZBTB4   | -8.61  | -1.67 | -0.54 | 0.98 | 21765466 ,<br>22343732 ,<br>22752225              | 21765466 ,<br>22343732 ,<br>22752225 |
| hsa-miR-19a  | ZBTB4   | -10.52 | -1.89 | -0.42 | 0.97 | 20371350,<br>21765466 ,<br>22343732 ,<br>22752225 | 21765466 ,<br>22343732 ,<br>22752225 |
| hsa-miR-19b  | ZBTB4   | -6.60  | -1.89 | -0.42 | 0.97 | 20371350,<br>21765466 ,<br>22343732 ,<br>22752225 | 21765466 ,<br>22343732 ,<br>22752225 |
| hsa-miR-20a  | ZBTB4   | -6.35  | -1.67 | -0.54 | 0.98 | 20371350,<br>21765466 ,<br>22343732 ,<br>22752225 | 21765466 ,<br>22343732 ,<br>22752225 |
| hsa-let-7b   | ARID3B  | -6.20  | -1.02 | -0.72 | 1.00 |                                                   |                                      |
| hsa-miR-106a | CRIM1   | -6.84  | -1.27 | -0.24 | 0.76 | (evidence<br>for 20b,<br>21042576)                |                                      |
| hsa-miR-106a | ZNF1    | -8.46  | -2.78 | -1.17 | 1.00 | (evidence<br>for miR-17)                          |                                      |
| hsa-miR-106a | FYCO1   | -9.86  | -1.81 | -1.04 | 0.98 | (evidence<br>for miR-93)                          |                                      |
| hsa-miR-106a | EFCAB14 | -7.96  | -1.64 | -0.52 | 0.99 | 17242205                                          |                                      |
| hsa-miR-106a | JAK1    | -6.61  | -1.11 | -0.35 | 0.90 | 17242205                                          |                                      |
| hsa-miR-106a | AHNAK   | -10.51 | -1.35 | -0.46 | 0.93 |                                                   |                                      |
| hsa-miR-106a | SYNE1   | -8.33  | -1.09 | -0.33 | 0.65 |                                                   |                                      |
| hsa-miR-106b | ARHGAP1 | -7.53  | -1.11 | -0.33 | 0.90 | (evidence<br>for miR-19)                          |                                      |
| hsa-miR-106b | FYCO1   | -9.23  | -1.81 | -1.04 | 0.98 | (evidence<br>for miR-93)                          |                                      |
| hsa-miR-106b | EFCAB14 | -7.21  | -1.66 | -0.52 | 0.99 | 17242205                                          |                                      |
| hsa-miR-106b | JAK1    | -7.48  | -1.11 | -0.35 | 0.90 | 17242205                                          |                                      |
| hsa-miR-106b | AHNAK   | -8.83  | -1.35 | -0.46 | 0.93 |                                                   |                                      |
| hsa-miR-106b | DAB2    | -6.64  | -1.14 | -0.29 | 0.84 |                                                   |                                      |
| hsa-miR-106b | MMP2    | -7.57  | -1.13 | -0.46 | 0.55 |                                                   |                                      |
| hsa-miR-106b | SYNE1   | -7.47  | -1.09 | -0.33 | 0.65 |                                                   |                                      |
| hsa-miR-106b | TNS1    | -6.70  | -0.75 | -0.25 | 0.90 |                                                   |                                      |
| hsa-miR-130a | ACBD5   | -9.92  | -1.25 | -0.51 | 0.72 |                                                   |                                      |
| hsa-miR-130b | ARHGAP1 | -7.41  | -1.00 | -0.36 | 0.89 | 20371350                                          |                                      |
| hsa-miR-130b | ZBTB4   | -9.66  | -1.78 | -0.39 | 0.94 | 20371350                                          |                                      |
| hsa-miR-130b | ESR1    | -6.67  | -0.84 | -0.76 | 0.89 |                                                   |                                      |

|                |            |        |       |       |                                |
|----------------|------------|--------|-------|-------|--------------------------------|
| hsa-miR-135b   | C6orf120   | -9.73  | -1.27 | -0.45 | 0.92                           |
| hsa-miR-141    | TSHZ3      | -7.00  | -1.96 | -0.55 | 0.52                           |
| hsa-miR-142-3p | MYH10      | -7.43  | -1.10 | -0.32 | 0.84                           |
| hsa-miR-148a   | MTMR9      | -7.07  | -0.58 | -0.72 | 0.96 20371350                  |
| hsa-miR-15b    | MYLK       | -6.49  | -1.20 | -0.45 | 0.67                           |
| hsa-miR-15b    | SPRYD3     | -6.94  | -0.53 | -0.47 | 0.96                           |
| hsa-miR-16     | MYLK       | -6.31  | -1.20 | -0.45 | 0.67                           |
| hsa-miR-16     | SPRYD3     | -6.60  | -0.57 | -0.47 | 0.96                           |
| hsa-miR-17     | EFCAB14    | -8.18  | -1.64 | -0.52 | (evidence<br>0.99 for miR-106) |
| hsa-miR-17     | ARHGAP1    | -7.84  | -1.11 | -0.33 | (evidence<br>0.90 for miR-19)  |
| hsa-miR-17     | FYCO1      | -9.67  | -1.81 | -1.04 | (evidence<br>0.98 for miR-93)  |
| hsa-miR-17     | ZNFX1      | -6.76  | -2.78 | -1.17 | 1.00 19734348                  |
| hsa-miR-17     | CTSA       | -6.99  | -0.94 | -0.37 | 0.71                           |
| hsa-miR-17     | DAB2       | -6.33  | -1.14 | -0.29 | 0.84                           |
| hsa-miR-17     | ENPP5      | -6.29  | -2.50 | -0.92 | 0.98                           |
| hsa-miR-17     | ST6GALNAC6 | -6.60  | -0.66 | -0.32 | 0.66                           |
| hsa-miR-17     | TXNIP      | -6.38  | -1.91 | -0.65 | 0.98                           |
| hsa-miR-17     | ZBTB47     | -6.23  | -0.93 | -0.23 | 0.97                           |
| hsa-miR-18a    | CREBL2     | -10.51 | -1.03 | -0.47 | 0.57 20371350                  |
| hsa-miR-18a    | ESR1       | -6.70  | -1.09 | -0.68 | 0.81 19706389                  |
| hsa-miR-19a    | CREBL2     | -6.35  | -0.72 | -0.29 | 0.65 20371350                  |
| hsa-miR-19a    | ARHGAP1    | -9.50  | -0.71 | -0.22 | 0.90 20371350                  |
| hsa-miR-19b    | ARHGAP1    | -7.30  | -0.71 | -0.22 | 0.90 20371350                  |
| hsa-miR-19b    | EFR3A      | -6.25  | -1.07 | -0.26 | 0.53                           |
| hsa-miR-200a   | NRP1       | -6.85  | -1.09 | -0.37 | 0.74                           |
| hsa-miR-200a   | TSHZ3      | -7.25  | -1.96 | -0.55 | 0.52                           |
| hsa-miR-200b   | CRTAP      | -7.76  | -0.51 | -0.45 | 0.77                           |
| hsa-miR-200b   | FSTL1      | -6.43  | -0.50 | -0.25 | 0.58                           |
| hsa-miR-200b   | KIAA1462   | -6.26  | -1.17 | -0.72 | 0.93                           |
| hsa-miR-200b   | LHFP       | -6.57  | -2.54 | -0.78 | 0.74                           |
| hsa-miR-200b   | MCFD2      | -6.56  | -2.04 | -0.96 | 0.68                           |
| hsa-miR-200b   | OSTM1      | -7.67  | -1.36 | -0.65 | 0.57                           |
| hsa-miR-200b   | RECK       | -9.28  | -2.61 | -0.95 | 0.95                           |
| hsa-miR-200b   | SEC23A     | -8.34  | -2.61 | -0.84 | 0.91                           |
| hsa-miR-200b   | SYDE1      | -8.92  | -1.02 | -0.34 | 0.91                           |
| hsa-miR-200b   | TIMP2      | -6.84  | -1.10 | -0.60 | 0.87                           |
| hsa-miR-200b   | ZCCHC24    | -8.54  | -0.92 | -0.36 | 0.92                           |
| hsa-miR-200c   | FSTL1      | -6.77  | -0.50 | -0.25 | 0.58                           |

|              |            |        |       |       |                                |
|--------------|------------|--------|-------|-------|--------------------------------|
| hsa-miR-200c | KANK2      | -6.87  | -0.73 | -0.36 | 0.91                           |
| hsa-miR-200c | LHFP       | -9.43  | -2.54 | -0.78 | 0.74                           |
| hsa-miR-200c | OSTM1      | -6.39  | -1.62 | -0.65 | 0.57                           |
| hsa-miR-200c | RECK       | -9.10  | -2.60 | -0.95 | 0.95                           |
| hsa-miR-200c | SYDE1      | -7.15  | -1.02 | -0.34 | 0.91                           |
| hsa-miR-200c | ZCCHC24    | -11.20 | -0.92 | -0.36 | 0.92                           |
| hsa-miR-20a  | EFCAB14    | -6.51  | -2.50 | -0.52 | (evidence<br>0.99 for miR-106) |
| hsa-miR-20a  | ARHGAP1    | -7.59  | -1.11 | -0.33 | (evidence<br>0.90 for miR-19)  |
| hsa-miR-20a  | FYCO1      | -8.20  | -1.81 | -1.04 | (evidence<br>0.98 for miR-93)  |
| hsa-miR-20a  | CTSA       | -8.08  | -0.94 | -0.37 | 0.71                           |
| hsa-miR-20a  | DAB2       | -6.37  | -1.14 | -0.29 | 0.84                           |
| hsa-miR-20a  | ST6GALNAC6 | -6.54  | -0.65 | -0.32 | 0.66                           |
| hsa-miR-20b  | AHNAK      | -6.51  | -1.35 | -0.46 | 0.93                           |
| hsa-miR-22   | PRPF38A    | -10.58 | -0.68 | -0.43 | 0.82                           |
| hsa-miR-26a  | MAPK6      | -8.75  | -1.37 | -0.52 | 0.64                           |
| hsa-miR-26a  | SFXN1      | -9.39  | -1.22 | -0.39 | 0.75                           |
| hsa-miR-27a  | CCNG1      | -7.31  | -1.23 | -0.60 | 0.77                           |
| hsa-miR-29a  | TDG        | -14.85 | -2.41 | -0.59 | (evidence<br>0.75 for 29c)     |
| hsa-miR-29a  | TET1       | -6.45  | -1.71 | -0.69 | 1.00 19850741                  |
| hsa-miR-29a  | NREP       | -9.19  | -1.23 | -0.37 | 0.87                           |
| hsa-miR-29a  | TAF11      | -12.60 | -1.66 | -0.54 | 0.51                           |
| hsa-miR-29b  | TDG        | -6.88  | -2.41 | -0.59 | (evidence<br>0.75 for 29c)     |
| hsa-miR-29b  | TET1       | -9.96  | -1.67 | -0.69 | 1.00 19850741                  |
| hsa-miR-29b  | NREP       | -19.62 | -1.23 | -0.37 | 0.87                           |
| hsa-miR-29b  | UBTD2      | -10.06 | -0.64 | -0.24 | 0.80                           |
| hsa-miR-29c  | TDG        | -6.68  | -2.41 | -0.59 | 0.75 18390668                  |
| hsa-miR-29c  | TET1       | -8.28  | -1.71 | -0.69 | (evidence<br>1.00 for 29a/b)   |
| hsa-miR-29c  | NREP       | -8.71  | -1.23 | -0.37 | 0.87                           |
| hsa-miR-29c  | WASF1      | -7.12  | -0.89 | -0.23 | 0.58                           |
| hsa-miR-301a | ARHGAP1    | -7.27  | -0.99 | -0.36 | (evidence<br>0.89 for miR-130) |
| hsa-miR-301b | ARHGAP1    | -6.27  | -0.99 | -0.36 | (evidence<br>0.89 for miR-130) |

|                |         |        |       |       |                  |
|----------------|---------|--------|-------|-------|------------------|
| hsa-miR-30a    | MYBL2   | -8.24  | -0.71 | -0.32 | 0.82             |
| hsa-miR-30a    | TDG     | -7.39  | -0.69 | -0.28 | 0.86             |
| hsa-miR-30b    | SEC23A  | -15.35 | -1.93 | -0.60 | 0.89 18668040    |
| hsa-miR-30b    | FAP     | -7.09  | -1.30 | -0.50 | 0.69             |
| hsa-miR-30c    | SEC23A  | -8.00  | -1.93 | -0.60 | 0.89 18668040    |
| hsa-miR-30c    | FAP     | -10.66 | -1.30 | -0.50 | 0.69             |
| hsa-miR-30c    | PRDM1   | -6.33  | -1.73 | -0.91 | 0.97             |
| hsa-miR-30d    | SEC23A  | -9.18  | -1.93 | -0.60 | 0.89 18668040    |
| hsa-miR-30d    | CTHRC1  | -8.24  | -1.18 | -0.47 | 0.61             |
| hsa-miR-30d    | FAP     | -8.63  | -1.30 | -0.50 | 0.69             |
| hsa-miR-30d    | MAP4K4  | -6.45  | -0.98 | -0.46 | 0.96             |
| hsa-miR-30e    | SEC23A  | -6.91  | -1.92 | -0.60 | 0.89 18668040    |
| hsa-miR-30e    | P4HA2   | -6.21  | -1.14 | -0.45 | 0.51 18668040    |
| hsa-miR-30e    | ITGA5   | -6.57  | -0.91 | -0.30 | 0.69             |
| hsa-miR-30e    | MAP4K4  | -6.34  | -0.98 | -0.46 | 0.96             |
| hsa-miR-32     | MSRB3   | -9.80  | -0.59 | -0.57 | 0.88             |
| hsa-miR-33b    | CACNA1C | -6.25  | -0.66 | -0.41 | 0.55             |
| hsa-miR-429    | CRTAP   | -7.36  | -0.52 | -0.45 | 0.77             |
| hsa-miR-429    | FEZ2    | -6.37  | -1.56 | -0.73 | 0.97             |
| hsa-miR-429    | JAZF1   | -6.50  | -1.22 | -0.43 | 0.83             |
| hsa-miR-429    | MCFD2   | -7.75  | -2.05 | -0.96 | 0.68             |
| hsa-miR-429    | MYLK    | -6.95  | -1.35 | -0.39 | 0.58             |
| hsa-miR-429    | OSTM1   | -8.34  | -1.40 | -0.65 | 0.57             |
| hsa-miR-429    | RECK    | -8.15  | -2.77 | -0.95 | 0.95             |
| hsa-miR-429    | SEC23A  | -8.52  | -3.08 | -0.84 | 0.91             |
| hsa-miR-429    | SYDE1   | -6.55  | -1.02 | -0.34 | 0.91             |
| hsa-miR-429    | WIPF1   | -7.41  | -3.56 | -1.04 | 0.99             |
| hsa-miR-429    | ZCCHC24 | -7.73  | -0.93 | -0.36 | 0.92             |
|                |         |        |       |       | (evidence        |
| hsa-miR-590-5p | TIMP3   | -6.35  | -0.57 | -0.43 | 0.78 for miR-21) |
| hsa-miR-92a    | DNAJB9  | -6.57  | -1.48 | -0.42 | 0.96             |
| hsa-miR-93     | RORC    | -6.42  | -1.19 | -0.36 | 0.83             |
| hsa-miR-93     | SYNE1   | -6.99  | -1.09 | -0.33 | 0.65             |

### **Supplemental Table 3**

Correlations of DNA copy number and promoter methylation alterations with miRNA expression levels across cancer types.

| miRNA        | miRNA in pan-cancer network | 3rd highest R2 across cancer types | Cancer Types (R2 for correlation of DNA copy number level and miRNA expression across tumor samples) |       |       |       |       |       |       |       |       |       |
|--------------|-----------------------------|------------------------------------|------------------------------------------------------------------------------------------------------|-------|-------|-------|-------|-------|-------|-------|-------|-------|
|              |                             |                                    | GBM                                                                                                  | OVA   | CRC   | KIRC  | LUSC  | BRCA  | UCEC  | BLCA  | HNSC  | LUAD  |
| hsa-miR-106b | yes                         | 0.134                              | NA                                                                                                   | 0.038 | 0.018 | 0.183 | 0.133 | 0.106 | 0.100 | 0.095 | 0.096 | 0.081 |
| hsa-miR-130a | yes                         | 0.050                              | 0.024                                                                                                | 0.055 | 0.022 | 0.026 | 0.011 | 0.050 | 0.034 | 0.048 | 0.051 | 0.002 |
| hsa-miR-130b | yes                         | 0.110                              | 0.062                                                                                                | 0.110 | 0.035 | 0.000 | 0.149 | 0.081 | 0.000 | 0.237 | 0.031 | 0.088 |
| hsa-miR-135b | yes                         | 0.059                              | 0.089                                                                                                | 0.059 | 0.085 | 0.036 | 0.002 | 0.000 | 0.011 | 0.043 | 0.006 | 0.053 |
| hsa-miR-141  | yes                         | 0.132                              | NA                                                                                                   | 0.213 | 0.092 | 0.014 | 0.109 | 0.145 | 0.056 | 0.040 | 0.112 | 0.077 |
| hsa-miR-142  | yes                         | 0.011                              | 0.000                                                                                                | 0.001 | 0.009 | 0.000 | 0.011 | 0.007 | 0.014 | 0.003 | 0.015 | 0.004 |
| hsa-miR-148a | yes                         | 0.050                              | 0.107                                                                                                | 0.106 | 0.018 | 0.026 | 0.000 | 0.048 | 0.050 | 0.031 | 0.002 | 0.001 |
| hsa-miR-15b  | yes                         | 0.154                              | 0.054                                                                                                | 0.105 | 0.023 | 0.063 | 0.296 | 0.131 | 0.061 | 0.179 | 0.108 | 0.154 |
| hsa-miR-16   | yes                         | 0.116                              | 0.009                                                                                                | 0.051 | 0.024 | 0.009 | 0.170 | 0.049 | 0.001 | 0.015 | 0.015 | 0.048 |
| hsa-miR-17   | yes                         | 0.172                              | 0.016                                                                                                | 0.220 | 0.096 | 0.005 | 0.028 | 0.119 | 0.014 | 0.070 | 0.066 | 0.098 |
| hsa-miR-18a  | yes                         | 0.043                              | 0.003                                                                                                | 0.131 | 0.017 | 0.001 | 0.034 | 0.062 | 0.003 | 0.035 | 0.032 | 0.043 |
| hsa-miR-19a  | yes                         | 0.057                              | 0.028                                                                                                | 0.169 | 0.057 | 0.000 | 0.002 | 0.065 | 0.014 | 0.036 | 0.046 | 0.041 |
| hsa-miR-19b  | yes                         | 0.105                              | 0.029                                                                                                | 0.245 | 0.123 | 0.001 | 0.016 | 0.105 | 0.003 | 0.045 | 0.054 | 0.101 |
| hsa-miR-200a | yes                         | 0.079                              | 0.016                                                                                                | 0.088 | 0.051 | 0.032 | 0.004 | 0.039 | 0.073 | 0.022 | 0.004 | 0.025 |
| hsa-miR-200b | yes                         | 0.070                              | NA                                                                                                   | 0.162 | 0.060 | 0.020 | 0.001 | 0.070 | 0.053 | 0.053 | 0.001 | 0.059 |
| hsa-miR-200c | yes                         | 0.171                              | 0.020                                                                                                | 0.201 | 0.041 | 0.030 | 0.171 | 0.231 | 0.126 | 0.046 | 0.122 | 0.053 |
| hsa-miR-20a  | yes                         | 0.164                              | NA                                                                                                   | 0.150 | 0.182 | 0.022 | 0.024 | 0.104 | 0.008 | 0.054 | 0.021 | 0.064 |
| hsa-miR-21   | yes                         | 0.072                              | 0.010                                                                                                | 0.054 | 0.079 | 0.009 | 0.006 | 0.132 | 0.058 | 0.005 | 0.018 | 0.008 |
| hsa-miR-22   | yes                         | 0.138                              | 0.047                                                                                                | 0.039 | 0.052 | 0.001 | 0.198 | 0.054 | 0.138 | 0.215 | 0.007 | 0.008 |
| hsa-miR-26a  | yes                         | 0.076                              | NA                                                                                                   | 0.012 | 0.027 | 0.019 | 0.003 | 0.002 | 0.014 | NA    | 0.003 | 0.006 |
| hsa-miR-27a  | yes                         | 0.074                              | NA                                                                                                   | 0.038 | 0.017 | 0.001 | 0.181 | 0.032 | 0.022 | 0.133 | 0.037 | 0.063 |
| hsa-miR-29a  | yes                         | 0.080                              | NA                                                                                                   | 0.013 | 0.005 | 0.077 | 0.008 | 0.026 | 0.039 | 0.035 | 0.002 | 0.028 |
| hsa-miR-29b  | yes                         | 0.044                              | NA                                                                                                   | 0.045 | 0.003 | 0.033 | 0.002 | 0.008 | 0.003 | 0.000 | 0.002 | 0.017 |
| hsa-miR-29c  | yes                         | 0.055                              | NA                                                                                                   | 0.055 | 0.048 | 0.070 | 0.029 | 0.034 | 0.089 | 0.003 | 0.001 | 0.007 |
| hsa-miR-301a | yes                         | 0.094                              | 0.027                                                                                                | 0.150 | 0.043 | 0.043 | 0.066 | 0.094 | 0.017 | 0.103 | 0.012 | 0.069 |
| hsa-miR-301b | yes                         | 0.025                              | NA                                                                                                   | 0.017 | NA    | NA    | 0.036 | NA    | 0.000 | 0.132 | 0.006 | 0.025 |
| hsa-miR-30a  | yes                         | 0.047                              | 0.039                                                                                                | 0.045 | 0.017 | 0.127 | 0.011 | 0.015 | 0.032 | 0.001 | 0.000 | 0.007 |
| hsa-miR-30b  | yes                         | 0.151                              | NA                                                                                                   | 0.356 | NA    | 0.065 | 0.053 | 0.243 | 0.000 | 0.132 | 0.012 | 0.074 |
| hsa-miR-30c  | yes                         | 0.053                              | 0.007                                                                                                | 0.226 | 0.006 | 0.044 | 0.029 | 0.011 | 0.053 | 0.110 | 0.029 | 0.051 |
| hsa-miR-30d  | yes                         | 0.252                              | NA                                                                                                   | 0.334 | 0.087 | 0.032 | 0.073 | 0.255 | 0.003 | 0.059 | 0.004 | 0.074 |
| hsa-miR-30e  | yes                         | 0.131                              | 0.009                                                                                                | 0.242 | 0.012 | 0.084 | 0.130 | 0.163 | 0.062 | 0.131 | 0.019 | 0.050 |
| hsa-miR-32   | yes                         | 0.071                              | 0.017                                                                                                | 0.042 | 0.045 | 0.081 | 0.109 | 0.038 | 0.054 | 0.071 | 0.070 | 0.065 |

|              |     |       |       |       |       |       |       |       |       |       |       |       |
|--------------|-----|-------|-------|-------|-------|-------|-------|-------|-------|-------|-------|-------|
| hsa-miR-33b  | yes | 0.025 | NA    | 0.006 | 0.018 | 0.004 | 0.025 | 0.014 | 0.041 | 0.056 | 0.000 | 0.009 |
| hsa-miR-429  | yes | 0.045 | 0.005 | 0.112 | 0.026 | 0.032 | 0.002 | 0.045 | 0.044 | 0.032 | 0.000 | 0.069 |
| hsa-miR-590  | yes | 0.080 | NA    | NA    | 0.006 | 0.072 | 0.023 | 0.025 | 0.016 | 0.007 | 0.004 | 0.011 |
| hsa-miR-92a  | yes | 0.157 | 0.057 | 0.219 | 0.272 | 0.024 | 0.085 | 0.157 | 0.029 | 0.037 | 0.035 | 0.083 |
| hsa-miR-93   | yes | 0.102 | NA    | 0.100 | 0.009 | 0.037 | 0.079 | 0.054 | 0.010 | 0.122 | 0.067 | 0.061 |
| hsa-let7b    | yes | 0.062 | NA    | 0.001 | 0.000 | 0.010 | 0.015 | 0.012 | 0.095 | 0.071 | 0.062 | 0.057 |
| hsa-miR-1    | no  | 0.014 | 0.000 | 0.014 | 0.022 | 0.000 | 0.000 | 0.001 | 0.000 | 0.017 | 0.000 | 0.000 |
| hsa-miR-100  | no  | 0.038 | 0.025 | 0.039 | 0.021 | 0.038 | 0.002 | 0.011 | 0.010 | 0.118 | 0.032 | 0.027 |
| hsa-miR-101  | no  | 0.023 | NA    | 0.057 | 0.000 | 0.005 | 0.005 | 0.010 | 0.010 | 0.121 | 0.000 | 0.002 |
| hsa-miR-107  | no  | 0.032 | 0.025 | 0.005 | 0.003 | 0.012 | 0.059 | 0.000 | 0.058 | 0.032 | 0.002 | 0.022 |
| hsa-miR-10a  | no  | 0.014 | 0.001 | 0.009 | 0.034 | 0.014 | 0.003 | 0.000 | 0.004 | 0.047 | 0.007 | 0.011 |
| hsa-miR-10b  | no  | 0.011 | NA    | 0.018 | 0.009 | 0.010 | 0.026 | 0.001 | 0.001 | 0.011 | 0.009 | 0.004 |
| hsa-miR-1247 | no  | 0.022 | NA    | NA    | 0.000 | 0.023 | 0.019 | 0.002 | 0.050 | 0.020 | 0.022 | 0.002 |
| hsa-miR-125a | no  | 0.070 | NA    | 0.068 | NA    | NA    | 0.037 | 0.035 | 0.023 | 0.125 | 0.003 | 0.008 |
| hsa-miR-125b | no  | 0.041 | 0.006 | 0.013 | 0.016 | 0.002 | 0.052 | 0.021 | 0.004 | 0.107 | 0.013 | 0.027 |
| hsa-miR-126  | no  | 0.015 | 0.003 | 0.009 | 0.003 | 0.044 | 0.000 | 0.001 | 0.000 | 0.002 | 0.000 | 0.006 |
| hsa-miR-127  | no  | 0.023 | 0.107 | 0.000 | 0.013 | 0.021 | 0.023 | 0.003 | 0.007 | 0.021 | 0.028 | 0.006 |
| hsa-miR-128  | no  | 0.096 | 0.008 | 0.140 | 0.027 | 0.039 | 0.096 | 0.060 | 0.009 | 0.096 | 0.060 | 0.027 |
| hsa-miR-129  | no  | 0.017 | 0.000 | 0.007 | NA    | 0.001 | 0.017 | 0.024 | 0.005 | 0.032 | 0.003 | 0.001 |
| hsa-miR-132  | no  | 0.086 | NA    | 0.022 | NA    | NA    | 0.008 | NA    | 0.030 | 0.048 | 0.001 | 0.003 |
| hsa-miR-133a | no  | 0.004 | 0.001 | 0.037 | 0.000 | 0.000 | 0.004 | 0.005 | 0.001 | 0.003 | 0.001 | 0.004 |
| hsa-miR-133b | no  | 0.002 | 0.001 | 0.000 | 0.003 | NA    | NA    | NA    | 0.000 | 0.002 | 0.002 | 0.000 |
| hsa-miR-134  | no  | 0.035 | 0.054 | 0.001 | 0.007 | 0.012 | 0.035 | 0.004 | 0.008 | 0.044 | 0.021 | 0.001 |
| hsa-miR-135a | no  | 0.009 | 0.027 | 0.008 | NA    | 0.003 | 0.009 | 0.006 | 0.008 | 0.091 | NA    | 0.005 |
| hsa-miR-136  | no  | 0.021 | 0.068 | 0.001 | 0.013 | 0.009 | 0.021 | 0.001 | 0.010 | 0.049 | 0.004 | 0.006 |
| hsa-miR-137  | no  | 0.054 | 0.001 | 0.054 | NA    | NA    | 0.066 | NA    | NA    | 0.091 | 0.039 | 0.038 |
| hsa-miR-138  | no  | 0.001 | 0.059 | 0.002 | NA    | NA    | 0.000 | NA    | NA    | 0.001 | 0.000 | 0.001 |
| hsa-miR-139  | no  | 0.010 | 0.004 | 0.000 | NA    | 0.002 | 0.001 | 0.004 | 0.003 | 0.008 | 0.000 | 0.000 |
| hsa-miR-140  | no  | 0.086 | 0.021 | 0.086 | 0.014 | 0.000 | 0.005 | 0.104 | 0.111 | 0.022 | 0.001 | 0.029 |
| hsa-miR-143  | no  | 0.006 | 0.001 | 0.000 | 0.012 | 0.001 | 0.001 | 0.002 | 0.000 | 0.002 | 0.003 | 0.002 |
| hsa-miR-144  | no  | 0.002 | NA    | 0.001 | 0.000 | 0.005 | 0.002 | 0.000 | 0.000 | 0.004 | 0.000 | 0.001 |
| hsa-miR-145  | no  | 0.003 | NA    | 0.001 | 0.005 | 0.003 | 0.000 | 0.000 | 0.000 | 0.000 | 0.018 | 0.002 |
| hsa-miR-146a | no  | 0.050 | 0.001 | 0.002 | 0.021 | 0.000 | 0.050 | 0.027 | 0.062 | 0.001 | 0.106 | 0.035 |
| hsa-miR-146b | no  | 0.016 | 0.001 | 0.077 | 0.011 | 0.015 | 0.003 | 0.000 | 0.000 | 0.002 | 0.001 | 0.001 |
| hsa-miR-147b | no  | 0.011 | NA    | 0.004 | 0.013 | NA    | 0.011 | NA    | NA    | 0.001 | 0.017 | 0.009 |
| hsa-miR-148b | no  | 0.101 | 0.101 | 0.168 | 0.060 | 0.051 | 0.066 | 0.022 | 0.028 | 0.211 | 0.004 | 0.014 |
| hsa-miR-149  | no  | 0.046 | 0.012 | 0.085 | 0.051 | 0.046 | 0.001 | 0.009 | 0.015 | 0.023 | 0.018 | 0.007 |
| hsa-miR-150  | no  | 0.004 | NA    | 0.016 | NA    | NA    | 0.000 | 0.000 | 0.001 | 0.000 | 0.002 | 0.008 |
| hsa-miR-151  | no  | 0.280 | NA    | 0.260 | 0.264 | 0.004 | 0.177 | 0.294 | 0.058 | 0.101 | 0.099 | 0.167 |
| hsa-miR-152  | no  | 0.034 | 0.007 | 0.043 | 0.018 | 0.007 | 0.085 | 0.000 | 0.014 | 0.023 | 0.034 | 0.000 |
| hsa-miR-153  | no  | 0.035 | 0.041 | 0.035 | 0.062 | NA    | NA    | 0.003 | 0.001 | NA    | NA    | 0.000 |
| hsa-miR-154  | no  | 0.036 | 0.037 | 0.000 | 0.003 | 0.005 | 0.027 | 0.001 | 0.008 | 0.027 | 0.002 | 0.002 |



|              |    |       |       |       |       |       |       |       |       |       |       |       |
|--------------|----|-------|-------|-------|-------|-------|-------|-------|-------|-------|-------|-------|
| hsa-miR-155  | no | 0.015 | 0.059 | 0.015 | 0.013 | 0.015 | 0.002 | 0.009 | 0.004 | 0.000 | 0.038 | 0.009 |
| hsa-miR-15a  | no | 0.056 | 0.070 | 0.046 | 0.122 | 0.011 | 0.044 | 0.049 | 0.005 | 0.032 | 0.033 | 0.056 |
| hsa-miR-181a | no | 0.063 | 0.095 | 0.002 | 0.008 | 0.006 | 0.008 | 0.013 | 0.000 | 0.076 | 0.001 | 0.001 |
| hsa-miR-181b | no | 0.016 | 0.002 | 0.014 | 0.015 | 0.023 | 0.008 | 0.011 | 0.016 | 0.124 | 0.010 | 0.010 |
| hsa-miR-181c | no | 0.096 | 0.035 | 0.058 | 0.000 | 0.001 | 0.132 | 0.103 | 0.032 | 0.067 | 0.013 | 0.000 |
| hsa-miR-181d | no | 0.093 | 0.042 | 0.224 | 0.001 | 0.004 | 0.163 | 0.093 | 0.072 | 0.045 | 0.027 | 0.002 |
| hsa-miR-182  | no | 0.125 | 0.000 | 0.169 | 0.009 | 0.014 | 0.125 | 0.127 | 0.119 | 0.072 | 0.106 | 0.059 |
| hsa-miR-183  | no | 0.120 | 0.001 | 0.170 | 0.000 | 0.017 | 0.138 | 0.120 | 0.063 | 0.066 | 0.091 | 0.074 |
| hsa-miR-184  | no | 0.021 | 0.003 | 0.004 | NA    | 0.003 | 0.033 | 0.012 | 0.036 | 0.004 | 0.010 | 0.021 |
| hsa-miR-185  | no | 0.142 | 0.009 | 0.314 | 0.128 | 0.002 | 0.097 | 0.142 | 0.003 | 0.179 | 0.031 | 0.070 |
| hsa-miR-186  | no | 0.122 | 0.119 | 0.132 | 0.042 | 0.131 | 0.119 | 0.122 | 0.076 | 0.043 | 0.074 | 0.062 |
| hsa-miR-187  | no | 0.028 | 0.009 | 0.029 | 0.000 | 0.000 | 0.003 | 0.008 | 0.028 | 0.016 | 0.030 | 0.021 |
| hsa-miR-190  | no | 0.030 | 0.014 | 0.012 | 0.001 | 0.030 | 0.072 | 0.010 | 0.027 | 0.000 | 0.014 | 0.074 |
| hsa-miR-191  | no | 0.104 | 0.011 | 0.149 | 0.037 | 0.111 | 0.004 | 0.025 | 0.000 | 0.104 | 0.018 | 0.009 |
| hsa-miR-192  | no | 0.021 | NA    | 0.025 | 0.002 | 0.000 | 0.021 | 0.003 | 0.008 | 0.075 | NA    | 0.002 |
| hsa-miR-193a | no | 0.036 | NA    | 0.053 | 0.019 | 0.029 | 0.011 | 0.047 | 0.005 | 0.000 | 0.001 | 0.009 |
| hsa-miR-193b | no | 0.035 | NA    | 0.020 | NA    | 0.040 | 0.011 | 0.035 | 0.034 | 0.004 | 0.054 | 0.002 |
| hsa-miR-194  | no | 0.014 | NA    | 0.017 | 0.001 | 0.000 | 0.001 | 0.006 | 0.004 | 0.062 | 0.001 | 0.003 |
| hsa-miR-195  | no | 0.061 | NA    | 0.000 | NA    | 0.013 | 0.023 | 0.034 | 0.121 | 0.148 | 0.000 | 0.007 |
| hsa-miR-196a | no | 0.010 | 0.121 | 0.009 | 0.004 | 0.010 | 0.008 | 0.009 | 0.002 | 0.003 | 0.004 | 0.106 |
| hsa-miR-196b | no | 0.039 | 0.004 | 0.039 | 0.059 | 0.017 | 0.020 | 0.000 | 0.000 | 0.048 | 0.037 | 0.029 |
| hsa-miR-197  | no | 0.073 | 0.022 | 0.011 | 0.061 | 0.033 | 0.058 | 0.073 | 0.103 | 0.051 | 0.026 | 0.078 |
| hsa-miR-199a | no | 0.020 | 0.009 | NA    | 0.002 | 0.001 | 0.005 | 0.000 | 0.023 | 0.000 | 0.001 | 0.025 |
| hsa-miR-199b | no | 0.007 | 0.002 | 0.000 | 0.007 | 0.006 | 0.019 | 0.000 | 0.001 | 0.053 | 0.000 | 0.003 |
| hsa-miR-203  | no | 0.067 | 0.000 | 0.068 | 0.067 | 0.029 | 0.140 | 0.061 | 0.001 | 0.046 | 0.041 | 0.003 |
| hsa-miR-204  | no | 0.008 | 0.001 | 0.002 | 0.001 | 0.250 | 0.004 | 0.003 | 0.002 | 0.067 | 0.002 | 0.008 |
| hsa-miR-205  | no | 0.011 | 0.000 | 0.004 | 0.001 | 0.000 | 0.030 | 0.019 | 0.000 | 0.000 | 0.011 | 0.009 |
| hsa-miR-206  | no | 0.013 | 0.001 | 0.013 | NA    | 0.004 | NA    | 0.030 | 0.024 | NA    | 0.001 | NA    |
| hsa-miR-210  | no | 0.051 | 0.051 | 0.156 | 0.059 | 0.015 | 0.001 | 0.000 | 0.028 | 0.026 | 0.015 | 0.003 |
| hsa-miR-212  | no | 0.013 | 0.006 | 0.000 | 0.009 | 0.006 | 0.065 | 0.013 | 0.008 | 0.090 | 0.002 | 0.006 |
| hsa-miR-214  | no | 0.014 | 0.061 | 0.000 | 0.010 | 0.006 | 0.006 | 0.000 | 0.069 | 0.014 | 0.000 | 0.007 |
| hsa-miR-215  | no | 0.003 | 0.001 | 0.007 | 0.000 | 0.003 | 0.001 | 0.001 | 0.000 | 0.000 | 0.000 | 0.029 |
| hsa-miR-217  | no | 0.024 | 0.031 | NA    | 0.010 | 0.000 | 0.048 | 0.024 | 0.005 | 0.000 | 0.007 | 0.007 |
| hsa-miR-218  | no | 0.018 | 0.000 | 0.008 | 0.000 | 0.018 | 0.018 | 0.009 | 0.001 | 0.028 | 0.002 | 0.008 |
| hsa-miR-219  | no | 0.021 | 0.001 | NA    | NA    | NA    | 0.037 | NA    | 0.010 | 0.002 | 0.021 | 0.104 |
| hsa-miR-23a  | no | 0.076 | 0.040 | 0.302 | 0.002 | 0.000 | 0.228 | 0.076 | 0.020 | 0.035 | 0.019 | 0.014 |
| hsa-miR-23b  | no | 0.098 | 0.098 | 0.107 | 0.072 | 0.224 | 0.053 | 0.042 | 0.048 | 0.038 | 0.057 | 0.012 |
| hsa-miR-24   | no | 0.072 | 0.020 | 0.072 | 0.006 | 0.124 | 0.004 | 0.015 | 0.020 | 0.073 | 0.024 | 0.001 |
| hsa-miR-25   | no | 0.133 | 0.099 | 0.114 | 0.097 | 0.102 | 0.208 | 0.133 | 0.158 | 0.096 | 0.084 | 0.091 |
| hsa-miR-26b  | no | 0.056 | 0.008 | 0.114 | 0.017 | 0.066 | 0.056 | 0.032 | 0.008 | 0.031 | 0.019 | 0.000 |
| hsa-miR-27b  | no | 0.065 | 0.065 | 0.118 | 0.013 | 0.192 | 0.015 | 0.046 | 0.034 | 0.024 | 0.025 | 0.016 |
| hsa-miR-28   | no | 0.149 | NA    | 0.036 | 0.072 | 0.185 | 0.380 | 0.149 | 0.045 | 0.084 | 0.117 | 0.087 |

|              |    |       |       |       |       |       |       |       |       |       |       |       |
|--------------|----|-------|-------|-------|-------|-------|-------|-------|-------|-------|-------|-------|
| hsa-miR-296  | no | 0.042 | NA    | 0.013 | 0.060 | 0.081 | 0.038 | 0.018 | 0.038 | 0.021 | 0.003 | 0.042 |
| hsa-miR-299  | no | 0.018 | 0.052 | 0.000 | NA    | NA    | 0.017 | 0.003 | 0.003 | 0.018 | 0.051 | 0.008 |
| hsa-miR-31   | no | 0.107 | 0.086 | 0.107 | 0.000 | 0.015 | 0.135 | 0.011 | 0.000 | 0.223 | 0.097 | 0.032 |
| hsa-miR-320a | no | 0.159 | 0.126 | 0.242 | 0.059 | 0.090 | 0.077 | 0.159 | 0.104 | 0.162 | 0.136 | 0.072 |
| hsa-miR-320b | no | 0.005 | NA    | NA    | 0.003 | 0.001 | 0.022 | 0.005 | 0.000 | 0.011 | 0.002 | 0.004 |
| hsa-miR-323  | no | 0.034 | 0.038 | 0.000 | 0.005 | NA    | 0.034 | 0.000 | 0.000 | 0.086 | 0.019 | 0.017 |
| hsa-miR-324  | no | 0.052 | 0.006 | 0.108 | 0.024 | 0.052 | 0.035 | 0.052 | 0.001 | 0.103 | 0.021 | 0.014 |
| hsa-miR-326  | no | 0.044 | 0.003 | 0.044 | 0.004 | 0.000 | 0.000 | 0.073 | 0.002 | 0.047 | 0.003 | 0.034 |
| hsa-miR-328  | no | 0.052 | 0.009 | 0.002 | 0.001 | 0.055 | 0.014 | 0.081 | 0.024 | 0.052 | 0.010 | 0.043 |
| hsa-miR-330  | no | 0.042 | NA    | NA    | 0.014 | 0.001 | 0.020 | 0.018 | 0.013 | 0.060 | 0.030 | 0.033 |
| hsa-miR-331  | no | 0.080 | 0.017 | 0.233 | 0.046 | 0.080 | 0.019 | 0.021 | 0.021 | 0.120 | 0.038 | 0.020 |
| hsa-miR-335  | no | 0.068 | NA    | 0.027 | 0.051 | 0.017 | 0.068 | 0.047 | 0.011 | 0.102 | 0.045 | 0.076 |
| hsa-miR-337  | no | 0.014 | 0.005 | 0.001 | 0.006 | 0.024 | 0.040 | 0.002 | 0.003 | 0.014 | 0.007 | 0.009 |
| hsa-miR-338  | no | 0.019 | NA    | 0.001 | 0.002 | 0.000 | 0.007 | 0.022 | 0.001 | 0.002 | 0.007 | 0.029 |
| hsa-miR-339  | no | 0.117 | 0.179 | 0.117 | 0.079 | 0.085 | 0.082 | 0.040 | 0.023 | 0.054 | 0.104 | 0.142 |
| hsa-miR-33a  | no | 0.062 | NA    | 0.000 | 0.008 | NA    | 0.085 | 0.077 | 0.032 | 0.032 | 0.010 | 0.022 |
| hsa-miR-340  | no | 0.023 | NA    | 0.021 | 0.019 | 0.011 | 0.005 | 0.001 | 0.021 | 0.003 | 0.007 | 0.007 |
| hsa-miR-342  | no | 0.057 | NA    | 0.124 | NA    | 0.000 | 0.001 | 0.069 | 0.011 | 0.021 | 0.029 | 0.023 |
| hsa-miR-345  | no | 0.084 | 0.048 | 0.084 | 0.049 | 0.148 | 0.072 | 0.041 | 0.039 | 0.022 | 0.007 | 0.101 |
| hsa-miR-34a  | no | 0.049 | 0.012 | 0.049 | 0.035 | 0.001 | 0.059 | 0.024 | 0.103 | 0.010 | 0.000 | 0.038 |
| hsa-miR-34b  | no | 0.005 | 0.004 | 0.000 | NA    | NA    | 0.008 | NA    | 0.005 | NA    | 0.023 | 0.000 |
| hsa-miR-34c  | no | 0.013 | 0.000 | 0.013 | NA    | 0.002 | 0.024 | 0.002 | 0.005 | 0.022 | 0.010 | 0.000 |
| hsa-miR-365  | no | 0.023 | 0.001 | 0.035 | 0.007 | 0.013 | 0.042 | 0.023 | 0.019 | 0.020 | 0.015 | 0.000 |
| hsa-miR-369  | no | 0.027 | 0.030 | 0.001 | 0.026 | 0.006 | 0.018 | 0.000 | 0.001 | 0.027 | 0.032 | 0.001 |
| hsa-miR-370  | no | 0.022 | 0.004 | 0.002 | 0.000 | NA    | 0.025 | 0.002 | 0.002 | 0.032 | 0.022 | 0.016 |
| hsa-miR-375  | no | 0.020 | 0.001 | 0.010 | 0.002 | 0.020 | 0.031 | 0.003 | 0.022 | 0.000 | 0.006 | 0.007 |
| hsa-miR-376c | no | 0.014 | NA    | 0.000 | 0.010 | 0.005 | 0.024 | 0.001 | 0.014 | 0.009 | 0.023 | 0.008 |
| hsa-miR-377  | no | 0.004 | 0.101 | 0.000 | NA    | NA    | NA    | NA    | 0.000 | 0.002 | 0.001 | 0.005 |
| hsa-miR-378  | no | 0.042 | 0.000 | 0.141 | 0.005 | 0.084 | 0.011 | 0.029 | 0.016 | 0.035 | 0.006 | 0.004 |
| hsa-miR-379  | no | 0.033 | 0.048 | 0.000 | 0.003 | 0.010 | 0.042 | 0.004 | 0.009 | 0.033 | 0.029 | 0.004 |
| hsa-miR-381  | no | 0.034 | 0.037 | 0.000 | 0.021 | 0.011 | 0.042 | 0.000 | 0.009 | 0.014 | 0.034 | 0.001 |
| hsa-miR-382  | no | 0.023 | 0.025 | 0.000 | 0.001 | 0.003 | 0.021 | 0.002 | 0.007 | 0.048 | 0.023 | 0.002 |
| hsa-miR-409  | no | 0.040 | 0.062 | 0.000 | 0.003 | 0.002 | 0.042 | 0.003 | 0.002 | 0.040 | 0.029 | 0.007 |
| hsa-miR-410  | no | 0.045 | 0.049 | 0.000 | 0.013 | 0.006 | 0.017 | 0.003 | 0.000 | 0.052 | 0.045 | 0.003 |
| hsa-miR-411  | no | 0.023 | 0.047 | 0.000 | 0.003 | NA    | 0.023 | 0.000 | 0.002 | 0.019 | 0.039 | 0.005 |
| hsa-miR-423  | no | 0.139 | NA    | 0.118 | 0.047 | 0.015 | 0.088 | 0.218 | 0.008 | 0.225 | 0.044 | 0.043 |
| hsa-miR-425  | no | 0.078 | 0.007 | 0.001 | 0.028 | NA    | 0.001 | 0.013 | 0.004 | 0.004 | 0.004 | 0.010 |
| hsa-miR-431  | no | 0.036 | NA    | 0.000 | NA    | 0.012 | 0.020 | 0.000 | 0.001 | 0.022 | 0.026 | 0.015 |
| hsa-miR-432  | no | 0.037 | 0.054 | 0.000 | NA    | 0.010 | 0.020 | 0.001 | 0.006 | 0.049 | 0.037 | 0.009 |
| hsa-miR-433  | no | 0.015 | 0.016 | 0.000 | NA    | NA    | 0.015 | 0.001 | 0.007 | 0.021 | 0.006 | 0.012 |
| hsa-miR-449a | no | 0.026 | 0.002 | 0.026 | NA    | NA    | 0.002 | 0.051 | 0.028 | 0.003 | NA    | 0.010 |
| hsa-miR-451  | no | 0.003 | 0.003 | 0.003 | 0.001 | 0.001 | 0.001 | 0.001 | 0.006 | 0.001 | 0.000 | 0.004 |

|              |    |       |       |       |       |       |       |       |       |       |       |       |
|--------------|----|-------|-------|-------|-------|-------|-------|-------|-------|-------|-------|-------|
| hsa-miR-454  | no | 0.090 | 0.028 | 0.090 | 0.023 | 0.008 | 0.034 | 0.134 | 0.036 | 0.133 | 0.002 | 0.047 |
| hsa-miR-455  | no | 0.133 | NA    | 0.013 | 0.002 | 0.276 | 0.019 | 0.014 | 0.112 | 0.156 | 0.030 | 0.033 |
| hsa-miR-483  | no | 0.013 | NA    | 0.013 | 0.368 | 0.005 | 0.002 | 0.000 | 0.002 | 0.013 | 0.002 | 0.003 |
| hsa-miR-484  | no | 0.061 | 0.037 | 0.225 | 0.004 | 0.021 | 0.102 | 0.027 | 0.029 | 0.061 | 0.022 | 0.002 |
| hsa-miR-485  | no | 0.026 | 0.030 | 0.000 | 0.000 | 0.000 | 0.026 | 0.000 | 0.000 | 0.032 | 0.016 | 0.004 |
| hsa-miR-486  | no | 0.017 | 0.000 | 0.001 | 0.019 | 0.014 | 0.017 | 0.032 | 0.001 | 0.001 | 0.000 | 0.000 |
| hsa-miR-487b | no | 0.010 | 0.012 | 0.000 | NA    | NA    | 0.010 | 0.000 | 0.003 | 0.008 | 0.023 | 0.004 |
| hsa-miR-491  | no | 0.115 | 0.121 | 0.028 | NA    | 0.035 | 0.029 | 0.103 | 0.036 | 0.328 | 0.050 | 0.115 |
| hsa-miR-493  | no | 0.025 | 0.001 | 0.001 | 0.000 | NA    | 0.025 | 0.000 | 0.000 | 0.040 | 0.024 | 0.004 |
| hsa-miR-494  | no | 0.004 | 0.002 | 0.000 | NA    | NA    | 0.026 | 0.001 | 0.004 | 0.004 | 0.007 | NA    |
| hsa-miR-495  | no | 0.018 | 0.060 | 0.000 | 0.008 | 0.005 | 0.018 | 0.000 | 0.004 | 0.013 | 0.018 | 0.002 |
| hsa-miR-496  | no | 0.020 | 0.020 | NA    | NA    | NA    | 0.036 | 0.001 | 0.003 | 0.043 | 0.007 | 0.001 |
| hsa-miR-497  | no | 0.073 | 0.073 | 0.018 | 0.001 | 0.014 | 0.001 | 0.065 | 0.163 | 0.158 | 0.000 | 0.019 |
| hsa-miR-511  | no | 0.003 | 0.001 | NA    | 0.000 | 0.000 | 0.001 | 0.018 | 0.003 | 0.015 | 0.003 | 0.001 |
| hsa-miR-519a | no | 0.002 | NA    | NA    | NA    | NA    | 0.006 | 0.000 | 0.000 | 0.010 | 0.001 | 0.002 |
| hsa-miR-526b | no | 0.002 | 0.002 | 0.002 | NA    | NA    | 0.000 | 0.004 | NA    | 0.015 | 0.000 | NA    |
| hsa-miR-539  | no | 0.009 | 0.003 | 0.000 | 0.016 | 0.005 | 0.005 | 0.001 | 0.009 | 0.010 | 0.003 | 0.002 |
| hsa-miR-551b | no | 0.033 | 0.013 | 0.024 | 0.002 | 0.011 | 0.094 | 0.001 | 0.033 | 0.014 | 0.041 | 0.007 |
| hsa-miR-574  | no | 0.043 | 0.001 | 0.021 | 0.004 | 0.003 | 0.053 | 0.001 | 0.009 | 0.028 | 0.067 | 0.043 |
| hsa-miR-576  | no | 0.038 | 0.001 | 0.003 | 0.038 | 0.013 | 0.004 | 0.022 | 0.022 | 0.052 | 0.052 | 0.003 |
| hsa-miR-577  | no | 0.044 | 0.021 | 0.030 | 0.073 | 0.006 | 0.057 | 0.000 | 0.028 | 0.044 | 0.009 | 0.003 |
| hsa-miR-582  | no | 0.046 | 0.000 | 0.046 | 0.049 | 0.004 | 0.001 | 0.008 | 0.001 | 0.014 | 0.075 | 0.001 |
| hsa-miR-584  | no | 0.028 | 0.008 | 0.013 | 0.028 | 0.000 | 0.002 | 0.091 | 0.051 | 0.022 | 0.001 | 0.000 |
| hsa-miR-589  | no | 0.086 | NA    | NA    | 0.004 | 0.020 | 0.062 | 0.006 | 0.070 | 0.023 | 0.003 | 0.021 |
| hsa-miR-592  | no | 0.013 | 0.006 | 0.013 | 0.040 | 0.003 | 0.000 | 0.000 | 0.003 | 0.004 | 0.012 | 0.016 |
| hsa-miR-598  | no | 0.073 | 0.010 | 0.073 | 0.018 | 0.095 | 0.047 | 0.037 | 0.001 | 0.124 | 0.032 | 0.017 |
| hsa-miR-615  | no | 0.010 | NA    | 0.002 | NA    | 0.039 | 0.004 | 0.010 | 0.001 | 0.000 | 0.005 | 0.043 |
| hsa-miR-616  | no | 0.034 | NA    | NA    | 0.019 | 0.091 | 0.034 | 0.014 | 0.000 | NA    | 0.001 | 0.078 |
| hsa-miR-625  | no | 0.096 | NA    | 0.064 | 0.152 | 0.004 | 0.096 | 0.101 | 0.000 | 0.003 | 0.027 | 0.049 |
| hsa-miR-627  | no | 0.038 | 0.038 | 0.090 | 0.005 | NA    | 0.000 | NA    | 0.003 | 0.045 | 0.018 | 0.010 |
| hsa-miR-628  | no | 0.026 | 0.026 | 0.016 | 0.034 | 0.019 | 0.000 | 0.002 | 0.052 | 0.000 | 0.001 | 0.011 |
| hsa-miR-629  | no | 0.041 | 0.000 | 0.039 | 0.052 | 0.003 | 0.049 | 0.008 | 0.014 | 0.007 | 0.041 | 0.021 |
| hsa-miR-653  | no | 0.045 | 0.010 | NA    | 0.005 | 0.008 | 0.156 | 0.000 | 0.045 | 0.068 | 0.031 | 0.004 |
| hsa-miR-654  | no | 0.027 | NA    | 0.001 | NA    | NA    | NA    | 0.000 | 0.007 | 0.036 | 0.024 | 0.003 |
| hsa-miR-655  | no | 0.014 | 0.001 | NA    | NA    | NA    | 0.047 | 0.000 | 0.014 | 0.007 | 0.023 | 0.012 |
| hsa-miR-671  | no | 0.069 | 0.003 | 0.000 | 0.000 | 0.035 | 0.094 | 0.040 | 0.001 | 0.020 | 0.042 | 0.028 |
| hsa-miR-7    | no | 0.055 | NA    | 0.027 | 0.055 | 0.043 | 0.046 | 0.046 | 0.052 | 0.069 | 0.067 | 0.012 |
| hsa-miR-708  | no | 0.035 | NA    | 0.126 | 0.007 | 0.015 | 0.004 | 0.025 | 0.028 | 0.000 | 0.099 | 0.011 |
| hsa-miR-744  | no | 0.126 | NA    | 0.002 | 0.066 | 0.028 | 0.053 | 0.055 | 0.039 | 0.079 | 0.000 | 0.003 |
| hsa-miR-758  | no | 0.037 | 0.056 | 0.003 | 0.002 | 0.001 | 0.037 | 0.001 | 0.000 | 0.056 | 0.022 | 0.010 |
| hsa-miR-760  | no | 0.022 | NA    | 0.003 | NA    | NA    | 0.001 | 0.056 | 0.022 | 0.039 | 0.013 | 0.012 |
| hsa-miR-769  | no | 0.094 | 0.001 | 0.144 | NA    | NA    | 0.056 | NA    | 0.002 | 0.047 | NA    | 0.013 |

|             |    |       |       |       |       |       |       |       |       |       |       |       |
|-------------|----|-------|-------|-------|-------|-------|-------|-------|-------|-------|-------|-------|
| hsa-miR-874 | no | 0.009 | NA    | 0.015 | 0.000 | 0.006 | 0.009 | 0.003 | 0.021 | 0.003 | 0.001 | 0.001 |
| hsa-miR-877 | no | 0.073 | NA    | 0.016 | NA    | NA    | 0.025 | NA    | 0.052 | 0.073 | 0.102 | 0.092 |
| hsa-miR-887 | no | 0.005 | NA    | 0.001 | NA    | 0.005 | 0.132 | 0.009 | 0.000 | 0.000 | 0.002 | 0.002 |
| hsa-miR-889 | no | 0.029 | NA    | 0.005 | 0.000 | 0.003 | 0.035 | 0.001 | 0.005 | 0.036 | 0.029 | 0.002 |
| hsa-miR-9   | no | 0.028 | 0.001 | 0.024 | NA    | 0.018 | 0.035 | 0.011 | 0.030 | 0.024 | 0.028 | 0.026 |
| hsa-miR-92b | no | 0.069 | 0.016 | 0.056 | 0.022 | 0.058 | 0.042 | 0.132 | 0.069 | 0.202 | 0.013 | 0.064 |
| hsa-miR-940 | no | 0.021 | NA    | 0.000 | 0.035 | NA    | 0.019 | 0.010 | 0.000 | 0.000 | 0.030 | 0.021 |
| hsa-miR-95  | no | 0.022 | 0.026 | 0.044 | 0.009 | 0.014 | 0.020 | 0.009 | 0.020 | 0.022 | 0.002 | 0.000 |
| hsa-miR-96  | no | 0.123 | 0.002 | 0.168 | 0.009 | 0.027 | 0.137 | 0.111 | 0.062 | 0.086 | 0.123 | 0.111 |
| hsa-miR-99a | no | 0.035 | NA    | 0.040 | NA    | 0.009 | 0.045 | 0.018 | 0.002 | 0.002 | 0.030 | 0.018 |
| hsa-miR-99b | no | 0.141 | 0.188 | 0.141 | 0.001 | 0.005 | 0.115 | 0.053 | 0.015 | 0.173 | 0.011 | 0.003 |
| hsa-let7a   | no | 0.046 | NA    | 0.011 | 0.037 | 0.043 | 0.004 | 0.018 | 0.061 | 0.011 | 0.032 | 0.009 |
| hsa-let7c   | no | 0.043 | 0.011 | 0.059 | 0.000 | 0.000 | 0.073 | 0.005 | 0.010 | 0.000 | 0.043 | 0.010 |
| hsa-let7d   | no | 0.042 | 0.001 | 0.038 | 0.027 | 0.065 | 0.028 | 0.015 | 0.001 | 0.025 | 0.075 | 0.020 |
| hsa-let7e   | no | 0.077 | NA    | 0.098 | 0.000 | 0.000 | 0.077 | 0.061 | 0.007 | 0.105 | 0.003 | 0.000 |
| hsa-let7f   | no | 0.092 | NA    | 0.006 | 0.064 | 0.105 | 0.065 | 0.044 | 0.093 | 0.007 | 0.070 | 0.092 |
| hsa-let7g   | no | 0.078 | NA    | 0.001 | 0.002 | 0.014 | 0.007 | 0.004 | 0.023 | 0.033 | 0.003 | 0.000 |
| hsa-let7i   | no | 0.045 | 0.059 | 0.026 | 0.002 | 0.119 | 0.000 | 0.005 | 0.003 | 0.045 | 0.013 | 0.016 |

| miRNA        | miRNA in pan-cancer network | 3rd highest R2 across cancer types | Cancer Types (R2 for correlation of DNA promoter methylation levels and miRNA expression across tumor samples) |       |       |       |       |       |       |       |       |       |  |
|--------------|-----------------------------|------------------------------------|----------------------------------------------------------------------------------------------------------------|-------|-------|-------|-------|-------|-------|-------|-------|-------|--|
|              |                             |                                    | GBM                                                                                                            | OVA   | CRC   | KIRC  | LUSC  | BRCA  | UCEC  | BLCA  | HNSC  | LUAD  |  |
| hsa-miR-106b | yes                         | 0.0685                             | NA                                                                                                             | 0.018 | 0.017 | 0.038 | 0.010 | 0.071 | 0.034 | 0.008 | 0.033 | 0.036 |  |
| hsa-miR-130a | yes                         | 0.0992                             | 0.012                                                                                                          | NA    | NA    | NA    | 0.001 | NA    | 0.136 | 0.183 | 0.070 | 0.099 |  |
| hsa-miR-130b | yes                         | 0.1433                             | 0.045                                                                                                          | 0.007 | 0.000 | 0.011 | 0.143 | 0.035 | 0.060 | 0.333 | 0.167 | 0.101 |  |
| hsa-miR-135b | yes                         | 0.3333                             | 0.005                                                                                                          | NA    | NA    | 0.011 | 0.153 | 0.006 | 0.274 | 0.482 | 0.350 | 0.333 |  |
| hsa-miR-141  | yes                         | 0.2959                             | NA                                                                                                             | 0.000 | 0.006 | 0.012 | 0.182 | 0.001 | 0.105 | 0.684 | 0.369 | 0.275 |  |
| hsa-miR-142  | yes                         | 0.2953                             | 0.009                                                                                                          | NA    | NA    | NA    | 0.053 | NA    | 0.242 | 0.296 | 0.173 | 0.179 |  |
| hsa-miR-148a | yes                         | 0.0793                             | 0.016                                                                                                          | NA    | NA    | NA    | 0.079 | NA    | 0.113 | 0.085 | 0.042 | 0.028 |  |
| hsa-miR-15b  | yes                         | 0.1149                             | 0.036                                                                                                          | 0.001 | 0.002 | 0.036 | 0.083 | 0.040 | 0.127 | 0.136 | 0.115 | 0.080 |  |
| hsa-miR-16   | yes                         | 0.1114                             | 0.027                                                                                                          | 0.001 | 0.000 | 0.054 | 0.187 | 0.095 | 0.028 | 0.057 | 0.076 | 0.090 |  |
| hsa-miR-17   | yes                         | 0.1337                             | 0.028                                                                                                          | NA    | NA    | NA    | 0.134 | NA    | 0.068 | 0.165 | 0.190 | 0.048 |  |
| hsa-miR-18a  | yes                         | 0.1286                             | 0.016                                                                                                          | NA    | NA    | NA    | 0.141 | NA    | 0.047 | 0.129 | 0.163 | 0.059 |  |
| hsa-miR-19a  | yes                         | 0.0895                             | 0.035                                                                                                          | NA    | NA    | NA    | 0.090 | NA    | 0.067 | 0.202 | 0.187 | 0.047 |  |
| hsa-miR-19b  | yes                         | 0.105                              | 0.053                                                                                                          | NA    | NA    | NA    | 0.053 | NA    | 0.078 | 0.152 | 0.191 | 0.069 |  |
| hsa-miR-200a | yes                         | 0.2634                             | 0.004                                                                                                          | NA    | NA    | 0.003 | 0.195 | 0.149 | 0.124 | 0.489 | 0.322 | 0.263 |  |
| hsa-miR-200b | yes                         | 0.2975                             | NA                                                                                                             | NA    | NA    | 0.004 | 0.198 | 0.140 | 0.059 | 0.477 | 0.358 | 0.297 |  |
| hsa-miR-200c | yes                         | 0.2925                             | 0.009                                                                                                          | 0.000 | 0.002 | 0.002 | 0.211 | 0.005 | 0.293 | 0.664 | 0.317 | 0.279 |  |
| hsa-miR-20a  | yes                         | 0.0893                             | NA                                                                                                             | NA    | NA    | NA    | 0.126 | NA    | 0.032 | 0.073 | 0.098 | 0.030 |  |
| hsa-miR-21   | yes                         | 0.0289                             | 0.013                                                                                                          | 0.002 | 0.008 | 0.009 | 0.004 | 0.000 | 0.042 | 0.083 | 0.000 | 0.005 |  |
| hsa-miR-22   | yes                         | 0.0241                             | 0.013                                                                                                          | NA    | NA    | 0.001 | 0.051 | 0.001 | 0.006 | 0.031 | 0.016 | 0.005 |  |
| hsa-miR-26a  | yes                         | 0.0599                             | NA                                                                                                             | 0.016 | 0.001 | 0.060 | 0.123 | 0.082 | 0.027 | NA    | 0.001 | 0.002 |  |
| hsa-miR-27a  | yes                         | 0.0434                             | NA                                                                                                             | NA    | NA    | 0.000 | 0.029 | 0.014 | 0.004 | 0.172 | 0.037 | 0.027 |  |
| hsa-miR-29a  | yes                         | 0.0032                             | NA                                                                                                             | NA    | NA    | 0.001 | NA    | 0.013 | NA    | NA    | NA    | NA    |  |
| hsa-miR-29b  | yes                         | 0.088                              | NA                                                                                                             | NA    | NA    | 0.013 | NA    | 0.016 | NA    | NA    | NA    | NA    |  |
| hsa-miR-29c  | yes                         | 0.069                              | NA                                                                                                             | 0.024 | 0.000 | 0.002 | 0.023 | 0.003 | 0.007 | 0.317 | 0.053 | 0.072 |  |
| hsa-miR-301a | yes                         | 0.0777                             | 0.011                                                                                                          | NA    | NA    | 0.016 | 0.090 | 0.057 | 0.120 | 0.078 | 0.008 | 0.034 |  |
| hsa-miR-301b | yes                         | 0.1043                             | NA                                                                                                             | 0.013 | NA    | NA    | 0.103 | NA    | 0.104 | 0.201 | 0.086 | 0.116 |  |
| hsa-miR-30a  | yes                         | 0.0322                             | 0.000                                                                                                          | NA    | NA    | 0.000 | 0.018 | 0.044 | 0.035 | 0.001 | 0.032 | 0.031 |  |
| hsa-miR-30b  | yes                         | 0.0654                             | NA                                                                                                             | NA    | NA    | 0.008 | 0.065 | 0.021 | 0.044 | 0.281 | 0.006 | 0.183 |  |
| hsa-miR-30c  | yes                         | 0.0687                             | 0.028                                                                                                          | 0.000 | 0.033 | 0.024 | 0.069 | 0.022 | 0.088 | 0.152 | 0.044 | 0.026 |  |
| hsa-miR-30d  | yes                         | 0.0656                             | NA                                                                                                             | NA    | NA    | 0.008 | 0.038 | 0.029 | 0.050 | 0.221 | 0.041 | 0.161 |  |
| hsa-miR-30e  | yes                         | 0.077                              | 0.004                                                                                                          | 0.004 | 0.000 | 0.065 | 0.071 | 0.069 | 0.013 | 0.056 | 0.001 | 0.008 |  |

|              |     |        |       |       |       |       |       |       |       |       |       |       |
|--------------|-----|--------|-------|-------|-------|-------|-------|-------|-------|-------|-------|-------|
| hsa-miR-32   | yes | 0.0726 | 0.003 | NA    | NA    | 0.073 | 0.076 | 0.037 | 0.020 | 0.102 | 0.021 | 0.013 |
| hsa-miR-33b  | yes | 0.1262 | NA    | 0.141 | 0.008 | 0.066 | 0.126 | 0.120 | 0.098 | 0.189 | 0.052 | 0.059 |
| hsa-miR-429  | yes | 0.2127 | 0.009 | NA    | NA    | 0.015 | 0.208 | 0.103 | 0.182 | 0.446 | 0.334 | 0.213 |
| hsa-miR-590  | yes | 0.0732 | NA    | NA    | 0.000 | 0.050 | 0.067 | 0.052 | 0.005 | 0.137 | 0.041 | 0.006 |
| hsa-miR-92a  | yes | 0.0723 | 0.004 | NA    | NA    | NA    | 0.072 | NA    | 0.049 | 0.188 | 0.144 | 0.043 |
| hsa-miR-93   | yes | 0.0752 | NA    | 0.020 | 0.028 | 0.002 | 0.108 | 0.060 | 0.075 | 0.082 | 0.072 | 0.042 |
| hsa-let7b    | yes | 0.1107 | NA    | NA    | NA    | NA    | 0.052 | NA    | 0.183 | 0.285 | 0.038 | 0.111 |
| hsa-miR-1    | no  | 0.0188 | 0.025 | NA    | NA    | 0.014 | 0.007 | 0.017 | 0.008 | 0.042 | 0.007 | 0.019 |
| hsa-miR-100  | no  | 0.0075 | 0.001 | NA    | NA    | 0.004 | 0.006 | 0.000 | 0.019 | 0.000 | 0.008 | 0.014 |
| hsa-miR-101  | no  | 0.0266 | NA    | NA    | NA    | NA    | 0.124 | NA    | 0.027 | 0.115 | 0.018 | 0.006 |
| hsa-miR-107  | no  | 0.0569 | 0.018 | 0.017 | 0.002 | 0.019 | 0.060 | 0.008 | 0.057 | 0.076 | 0.013 | 0.005 |
| hsa-miR-10a  | no  | 0.2529 | 0.006 | 0.021 | 0.253 | 0.206 | 0.097 | 0.226 | 0.287 | 0.387 | 0.219 | 0.210 |
| hsa-miR-10b  | no  | 0.1128 | NA    | 0.076 | 0.007 | 0.004 | 0.043 | 0.002 | 0.135 | 0.097 | 0.113 | 0.126 |
| hsa-miR-1247 | no  | 0.1449 | NA    | NA    | NA    | NA    | 0.047 | NA    | 0.065 | 0.145 | 0.176 | 0.172 |
| hsa-miR-125a | no  | 0.0462 | NA    | NA    | NA    | NA    | 0.049 | NA    | 0.012 | 0.002 | 0.080 | 0.046 |
| hsa-miR-125b | no  | 0.082  | 0.006 | 0.016 | 0.000 | 0.013 | 0.063 | 0.038 | 0.143 | 0.082 | 0.130 | 0.011 |
| hsa-miR-126  | no  | 0.0736 | 0.002 | 0.011 | 0.018 | 0.091 | 0.101 | 0.008 | 0.016 | 0.074 | 0.006 | 0.010 |
| hsa-miR-127  | no  | 0.01   | 0.001 | NA    | NA    | 0.010 | 0.000 | 0.000 | 0.001 | 0.006 | 0.013 | 0.010 |
| hsa-miR-128  | no  | 0.0867 | 0.017 | 0.002 | 0.014 | 0.020 | 0.231 | 0.045 | 0.037 | 0.112 | 0.087 | 0.072 |
| hsa-miR-129  | no  | 0.0509 | 0.024 | NA    | NA    | 0.002 | 0.051 | 0.015 | 0.012 | 0.090 | 0.098 | 0.031 |
| hsa-miR-132  | no  | 0.0534 | NA    | NA    | NA    | NA    | 0.106 | NA    | 0.030 | 0.056 | 0.002 | 0.008 |
| hsa-miR-133a | no  | 0.0317 | 0.032 | NA    | NA    | 0.023 | 0.004 | 0.012 | 0.005 | 0.044 | 0.010 | 0.046 |
| hsa-miR-133b | no  | 0.0035 | 0.003 | NA    | NA    | NA    | NA    | NA    | 0.004 | 0.005 | 0.004 | 0.002 |
| hsa-miR-134  | no  | 0.0146 | 0.004 | NA    | NA    | 0.073 | 0.000 | 0.018 | 0.002 | 0.000 | 0.015 | 0.005 |
| hsa-miR-135a | no  | 0.0355 | 0.000 | NA    | NA    | 0.003 | 0.036 | 0.034 | 0.075 | 0.056 | NA    | 0.015 |
| hsa-miR-136  | no  | 0.0053 | 0.000 | NA    | NA    | 0.007 | 0.000 | 0.005 | 0.002 | 0.003 | 0.015 | 0.000 |
| hsa-miR-137  | no  | 0.0555 | 0.007 | NA    | NA    | NA    | 0.027 | NA    | NA    | 0.056 | 0.101 | 0.068 |
| hsa-miR-138  | no  | 0.0271 | 0.027 | NA    | NA    | NA    | 0.007 | NA    | NA    | 0.071 | 0.049 | 0.005 |
| hsa-miR-139  | no  | 0.0303 | 0.013 | 0.031 | NA    | 0.120 | 0.000 | 0.012 | 0.030 | 0.003 | 0.010 | 0.009 |
| hsa-miR-140  | no  | 0.1032 | 0.031 | 0.008 | 0.017 | 0.087 | 0.003 | 0.174 | 0.077 | 0.131 | 0.000 | 0.004 |
| hsa-miR-143  | no  | 0.0737 | 0.002 | NA    | NA    | 0.035 | 0.070 | 0.006 | 0.176 | 0.006 | 0.033 | 0.019 |
| hsa-miR-144  | no  | 0.0205 | NA    | NA    | NA    | 0.016 | 0.006 | 0.000 | 0.014 | 0.030 | 0.006 | 0.009 |
| hsa-miR-145  | no  | 0.0505 | NA    | NA    | NA    | 0.076 | 0.040 | 0.045 | 0.140 | 0.035 | 0.051 | 0.027 |
| hsa-miR-146a | no  | 0.0521 | 0.009 | NA    | NA    | NA    | 0.028 | NA    | 0.116 | 0.052 | 0.027 | 0.146 |
| hsa-miR-146b | no  | 0.0802 | 0.007 | NA    | NA    | 0.006 | 0.080 | 0.000 | 0.098 | 0.039 | 0.012 | 0.141 |
| hsa-miR-147b | no  | 0.0614 | NA    | 0.001 | 0.015 | NA    | 0.072 | NA    | NA    | 0.061 | 0.031 | 0.096 |
| hsa-miR-148b | no  | 0.0374 | 0.022 | 0.014 | 0.002 | 0.004 | 0.156 | 0.011 | 0.038 | 0.037 | 0.013 | 0.030 |
| hsa-miR-149  | no  | 0.2791 | 0.007 | 0.000 | 0.006 | 0.132 | 0.279 | 0.298 | 0.131 | 0.194 | 0.317 | 0.053 |
| hsa-miR-150  | no  | 0.0491 | NA    | 0.000 | NA    | NA    | 0.016 | 0.006 | 0.031 | 0.049 | 0.306 | 0.088 |
| hsa-miR-151  | no  | 0.0786 | NA    | 0.002 | 0.036 | 0.029 | 0.035 | 0.086 | 0.065 | 0.168 | 0.041 | 0.079 |
| hsa-miR-152  | no  | 0.0502 | 0.035 | NA    | NA    | 0.059 | 0.025 | 0.022 | 0.037 | 0.024 | 0.114 | 0.050 |
| hsa-miR-153  | no  | 0.0301 | 0.006 | 0.003 | 0.000 | NA    | NA    | 0.089 | 0.030 | NA    | NA    | 0.123 |

|              |    |        |       |       |       |       |       |       |       |       |       |       |
|--------------|----|--------|-------|-------|-------|-------|-------|-------|-------|-------|-------|-------|
| hsa-miR-154  | no | 0.0223 | 0.001 | NA    | NA    | 0.052 | 0.000 | 0.022 | 0.000 | 0.000 | 0.025 | 0.007 |
| hsa-miR-155  | no | 0.1051 | 0.040 | NA    | NA    | NA    | 0.107 | NA    | 0.024 | 0.105 | 0.091 | 0.132 |
| hsa-miR-15a  | no | 0.0801 | 0.004 | NA    | NA    | 0.005 | 0.080 | 0.001 | 0.053 | 0.223 | 0.118 | 0.023 |
| hsa-miR-181a | no | 0.0684 | 0.017 | NA    | NA    | 0.000 | 0.004 | 0.006 | 0.000 | 0.026 | 0.070 | 0.013 |
| hsa-miR-181b | no | 0.0948 | 0.014 | 0.021 | 0.001 | 0.019 | 0.026 | 0.015 | 0.095 | 0.115 | 0.120 | 0.079 |
| hsa-miR-181c | no | 0.0676 | 0.034 | 0.014 | 0.022 | 0.022 | 0.024 | 0.019 | 0.131 | 0.028 | 0.006 | 0.142 |
| hsa-miR-181d | no | 0.0531 | 0.007 | 0.000 | 0.021 | 0.012 | 0.020 | 0.010 | 0.135 | 0.021 | 0.053 | 0.210 |
| hsa-miR-182  | no | 0.0572 | 0.006 | NA    | NA    | NA    | 0.057 | NA    | 0.026 | 0.083 | 0.068 | 0.042 |
| hsa-miR-183  | no | 0.0781 | 0.006 | NA    | NA    | NA    | 0.091 | NA    | 0.032 | 0.102 | 0.078 | 0.044 |
| hsa-miR-184  | no | 0.0022 | 0.001 | NA    | NA    | NA    | 0.002 | NA    | 0.000 | 0.018 | 0.050 | 0.001 |
| hsa-miR-185  | no | 0.0536 | 0.022 | 0.000 | 0.051 | 0.042 | 0.021 | 0.033 | 0.098 | 0.096 | 0.054 | 0.032 |
| hsa-miR-186  | no | 0.0578 | 0.015 | 0.012 | 0.015 | 0.017 | 0.093 | 0.019 | 0.058 | 0.006 | 0.071 | 0.029 |
| hsa-miR-187  | no | 0.1782 | 0.003 | NA    | NA    | NA    | 0.136 | NA    | 0.178 | 0.505 | 0.283 | 0.127 |
| hsa-miR-190  | no | 0.0533 | 0.044 | 0.001 | 0.026 | 0.059 | 0.053 | 0.026 | 0.014 | 0.085 | 0.011 | 0.029 |
| hsa-miR-191  | no | 0.0921 | 0.005 | 0.007 | 0.002 | 0.025 | 0.092 | 0.049 | 0.102 | 0.306 | 0.057 | 0.026 |
| hsa-miR-192  | no | 0.1233 | NA    | 0.000 | 0.002 | 0.013 | 0.016 | 0.007 | 0.266 | 0.098 | NA    | 0.501 |
| hsa-miR-193a | no | 0.2152 | NA    | NA    | NA    | NA    | 0.030 | NA    | 0.099 | 0.315 | 0.153 | 0.223 |
| hsa-miR-193b | no | 0.262  | NA    | NA    | NA    | NA    | 0.032 | NA    | 0.008 | 0.251 | 0.361 | 0.238 |
| hsa-miR-194  | no | 0.1321 | NA    | 0.008 | 0.051 | 0.019 | 0.006 | 0.006 | 0.235 | 0.119 | 0.028 | 0.556 |
| hsa-miR-195  | no | 0.0896 | NA    | 0.001 | NA    | 0.012 | 0.020 | 0.021 | 0.331 | 0.088 | 0.096 | 0.061 |
| hsa-miR-196a | no | 0.2011 | 0.022 | 0.009 | 0.062 | 0.059 | 0.129 | 0.055 | 0.137 | 0.201 | 0.341 | 0.300 |
| hsa-miR-196b | no | 0.1525 | 0.039 | 0.000 | 0.151 | 0.253 | 0.070 | 0.102 | 0.153 | 0.291 | 0.064 | 0.124 |
| hsa-miR-197  | no | 0.005  | 0.003 | NA    | NA    | NA    | 0.044 | NA    | 0.057 | 0.002 | 0.002 | 0.005 |
| hsa-miR-199a | no | 0.1903 | 0.057 | NA    | 0.007 | 0.009 | 0.018 | 0.019 | 0.179 | 0.401 | 0.234 | 0.152 |
| hsa-miR-199b | no | 0.0752 | 0.036 | NA    | NA    | 0.012 | 0.232 | 0.003 | 0.015 | 0.083 | 0.041 | 0.075 |
| hsa-miR-203  | no | 0.0504 | 0.004 | NA    | NA    | 0.014 | 0.050 | 0.038 | 0.021 | 0.173 | 0.035 | 0.129 |
| hsa-miR-204  | no | 0.0693 | 0.005 | 0.001 | 0.046 | 0.204 | 0.069 | 0.016 | 0.006 | 0.007 | 0.073 | 0.064 |
| hsa-miR-205  | no | 0.2696 | 0.000 | NA    | NA    | NA    | 0.386 | NA    | 0.270 | 0.656 | 0.180 | 0.252 |
| hsa-miR-206  | no | 0.0002 | 0.000 | NA    | NA    | NA    | NA    | NA    | 0.012 | NA    | 0.008 | NA    |
| hsa-miR-210  | no | 0.1277 | 0.022 | 0.016 | 0.033 | 0.128 | 0.175 | 0.030 | 0.034 | 0.233 | 0.122 | 0.059 |
| hsa-miR-212  | no | 0.0383 | 0.025 | NA    | NA    | 0.000 | 0.014 | 0.002 | 0.038 | 0.212 | 0.038 | 0.050 |
| hsa-miR-214  | no | 0.1034 | 0.112 | NA    | NA    | 0.032 | 0.000 | 0.007 | 0.109 | 0.103 | 0.021 | 0.002 |
| hsa-miR-215  | no | 0.0129 | 0.002 | NA    | NA    | 0.013 | 0.042 | 0.003 | 0.012 | 0.031 | 0.000 | 0.004 |
| hsa-miR-217  | no | 0.0045 | 0.006 | NA    | NA    | NA    | 0.001 | NA    | 0.005 | 0.000 | 0.016 | 0.004 |
| hsa-miR-218  | no | 0.0861 | 0.030 | 0.037 | 0.079 | 0.086 | 0.086 | 0.024 | 0.091 | 0.098 | 0.075 | 0.061 |
| hsa-miR-219  | no | 0.0905 | 0.010 | NA    | NA    | NA    | 0.091 | NA    | 0.052 | 0.245 | 0.255 | 0.069 |
| hsa-miR-23a  | no | 0.055  | 0.004 | NA    | NA    | 0.002 | 0.061 | 0.011 | 0.050 | 0.421 | 0.055 | 0.052 |
| hsa-miR-23b  | no | 0.1528 | 0.022 | 0.000 | 0.003 | 0.137 | 0.093 | 0.153 | 0.052 | 0.202 | 0.167 | 0.038 |
| hsa-miR-24   | no | 0.098  | 0.034 | 0.014 | 0.004 | 0.090 | 0.088 | 0.061 | 0.045 | 0.001 | 0.041 | 0.052 |
| hsa-miR-25   | no | 0.0505 | 0.015 | 0.002 | 0.005 | 0.029 | 0.050 | 0.066 | 0.031 | 0.183 | 0.051 | 0.040 |
| hsa-miR-26b  | no | 0.0351 | 0.006 | 0.000 | 0.083 | 0.027 | 0.028 | 0.028 | 0.023 | 0.082 | 0.021 | 0.026 |
| hsa-miR-27b  | no | 0.1296 | 0.022 | 0.000 | 0.056 | 0.128 | 0.040 | 0.130 | 0.067 | 0.292 | 0.158 | 0.038 |

|              |    |        |       |       |       |       |       |       |       |       |       |       |
|--------------|----|--------|-------|-------|-------|-------|-------|-------|-------|-------|-------|-------|
| hsa-miR-28   | no | 0.0799 | NA    | 0.006 | 0.061 | 0.068 | 0.111 | 0.080 | 0.053 | 0.175 | 0.056 | 0.055 |
| hsa-miR-296  | no | 0.1383 | NA    | NA    | NA    | 0.001 | 0.054 | 0.002 | 0.166 | 0.194 | 0.138 | 0.095 |
| hsa-miR-299  | no | 0.0032 | 0.001 | NA    | NA    | NA    | 0.000 | 0.005 | 0.002 | 0.000 | 0.003 | 0.012 |
| hsa-miR-31   | no | 0.2514 | 0.000 | NA    | NA    | NA    | 0.116 | NA    | 0.031 | 0.372 | 0.308 | 0.231 |
| hsa-miR-320a | no | 0.0284 | 0.034 | NA    | NA    | NA    | 0.019 | NA    | 0.028 | 0.108 | 0.024 | 0.022 |
| hsa-miR-320b | no | 0.0156 | NA    | NA    | NA    | NA    | 0.014 | NA    | 0.016 | 0.052 | 0.018 | 0.002 |
| hsa-miR-323  | no | 0.0079 | 0.008 | NA    | NA    | NA    | 0.000 | 0.015 | 0.012 | 0.000 | 0.008 | 0.004 |
| hsa-miR-324  | no | 0.0687 | 0.019 | 0.005 | 0.025 | 0.001 | 0.025 | 0.081 | 0.051 | 0.131 | 0.040 | 0.017 |
| hsa-miR-326  | no | 0.0501 | 0.002 | NA    | NA    | 0.032 | 0.024 | 0.045 | 0.041 | 0.246 | 0.050 | 0.107 |
| hsa-miR-328  | no | 0.0665 | 0.004 | 0.032 | 0.067 | 0.044 | 0.106 | 0.038 | 0.214 | 0.060 | 0.061 | 0.043 |
| hsa-miR-330  | no | 0.0298 | NA    | NA    | 0.001 | 0.020 | 0.013 | 0.061 | 0.022 | 0.067 | 0.021 | 0.028 |
| hsa-miR-331  | no | 0.0238 | 0.001 | NA    | NA    | NA    | 0.074 | NA    | 0.001 | 0.046 | 0.024 | 0.002 |
| hsa-miR-335  | no | 0.1557 | NA    | 0.047 | 0.156 | 0.116 | 0.132 | 0.092 | 0.086 | 0.247 | 0.236 | 0.108 |
| hsa-miR-337  | no | 0.0105 | 0.000 | NA    | NA    | 0.011 | 0.000 | 0.002 | 0.012 | 0.001 | 0.019 | 0.000 |
| hsa-miR-338  | no | 0.1265 | NA    | 0.002 | 0.028 | 0.015 | 0.039 | 0.094 | 0.101 | 0.025 | 0.009 | 0.310 |
| hsa-miR-339  | no | 0.0775 | 0.022 | 0.016 | 0.067 | 0.041 | 0.055 | 0.065 | 0.040 | 0.208 | 0.101 | 0.078 |
| hsa-miR-33a  | no | 0.0793 | NA    | 0.023 | 0.008 | NA    | 0.039 | 0.030 | 0.018 | 0.167 | 0.049 | 0.051 |
| hsa-miR-340  | no | 0.0525 | NA    | 0.001 | 0.019 | 0.014 | 0.057 | 0.053 | 0.081 | 0.018 | 0.048 | 0.046 |
| hsa-miR-342  | no | 0.1514 | NA    | 0.000 | NA    | 0.122 | 0.020 | 0.051 | 0.052 | 0.039 | 0.178 | 0.045 |
| hsa-miR-345  | no | 0.0941 | 0.010 | NA    | NA    | 0.000 | 0.094 | 0.020 | 0.015 | 0.173 | 0.131 | 0.071 |
| hsa-miR-34a  | no | 0.0587 | 0.012 | NA    | NA    | 0.029 | 0.059 | 0.004 | 0.074 | 0.265 | 0.035 | 0.035 |
| hsa-miR-34b  | no | 0.0234 | 0.015 | NA    | NA    | NA    | 0.067 | NA    | 0.023 | NA    | 0.199 | 0.018 |
| hsa-miR-34c  | no | 0.094  | 0.006 | NA    | NA    | NA    | 0.094 | NA    | 0.047 | 0.127 | 0.244 | 0.017 |
| hsa-miR-365  | no | 0.1643 | 0.002 | NA    | NA    | 0.054 | 0.114 | 0.002 | 0.082 | 0.164 | 0.274 | 0.169 |
| hsa-miR-369  | no | 0.0261 | 0.001 | NA    | NA    | 0.041 | 0.000 | 0.032 | 0.001 | 0.000 | 0.026 | 0.003 |
| hsa-miR-370  | no | 0.0069 | 0.000 | NA    | NA    | NA    | 0.005 | 0.010 | 0.000 | 0.000 | 0.032 | 0.007 |
| hsa-miR-375  | no | 0.0355 | 0.001 | NA    | NA    | 0.015 | 0.023 | 0.000 | 0.046 | 0.036 | 0.025 | 0.110 |
| hsa-miR-376c | no | 0.008  | NA    | NA    | NA    | NA    | 0.002 | NA    | 0.008 | 0.022 | 0.001 | 0.015 |
| hsa-miR-377  | no | 0.0127 | 0.001 | NA    | NA    | NA    | NA    | NA    | 0.005 | 0.000 | 0.011 | 0.002 |
| hsa-miR-378  | no | 0.048  | 0.037 | 0.017 | 0.014 | 0.019 | 0.034 | 0.013 | 0.008 | 0.128 | 0.012 | 0.009 |
| hsa-miR-379  | no | 0.018  | 0.001 | NA    | NA    | 0.067 | 0.000 | 0.022 | 0.003 | 0.001 | 0.018 | 0.014 |
| hsa-miR-381  | no | 0.0242 | 0.000 | NA    | NA    | 0.057 | 0.002 | 0.024 | 0.000 | 0.001 | 0.036 | 0.011 |
| hsa-miR-382  | no | 0.0169 | 0.003 | NA    | NA    | 0.044 | 0.000 | 0.024 | 0.003 | 0.000 | 0.017 | 0.008 |
| hsa-miR-409  | no | 0.0169 | 0.006 | NA    | NA    | 0.056 | 0.001 | 0.021 | 0.000 | 0.010 | 0.014 | 0.009 |
| hsa-miR-410  | no | 0.0121 | 0.009 | NA    | NA    | 0.030 | 0.000 | 0.012 | 0.003 | 0.001 | 0.017 | 0.010 |
| hsa-miR-411  | no | 0.0068 | 0.007 | NA    | NA    | NA    | 0.001 | 0.002 | 0.000 | 0.001 | 0.022 | 0.004 |
| hsa-miR-423  | no | 0.1007 | NA    | 0.001 | 0.006 | 0.078 | 0.000 | 0.060 | 0.017 | 0.111 | 0.054 | 0.002 |
| hsa-miR-425  | no | 0.0889 | 0.005 | 0.001 | 0.004 | NA    | 0.036 | 0.085 | 0.012 | 0.294 | 0.089 | 0.131 |
| hsa-miR-431  | no | 0.0065 | NA    | NA    | NA    | 0.013 | 0.002 | 0.001 | 0.001 | 0.012 | 0.003 | 0.007 |
| hsa-miR-432  | no | 0.0067 | 0.001 | NA    | NA    | 0.021 | 0.000 | 0.002 | 0.007 | 0.004 | 0.003 | 0.007 |
| hsa-miR-433  | no | 0.0018 | 0.002 | NA    | NA    | NA    | 0.001 | 0.000 | 0.000 | 0.006 | 0.018 | 0.001 |
| hsa-miR-449a | no | 0.0211 | 0.002 | 0.006 | NA    | NA    | 0.011 | 0.009 | 0.049 | 0.100 | NA    | 0.021 |



|              |    |        |       |       |       |       |       |       |       |       |       |       |
|--------------|----|--------|-------|-------|-------|-------|-------|-------|-------|-------|-------|-------|
| hsa-miR-451  | no | 0.0174 | 0.006 | NA    | NA    | 0.013 | 0.018 | 0.001 | 0.017 | 0.120 | 0.002 | 0.015 |
| hsa-miR-454  | no | 0.0749 | 0.026 | NA    | NA    | 0.031 | 0.075 | 0.040 | 0.161 | 0.112 | 0.034 | 0.027 |
| hsa-miR-455  | no | 0.145  | NA    | 0.001 | 0.041 | 0.074 | 0.023 | 0.145 | 0.022 | 0.190 | 0.216 | 0.034 |
| hsa-miR-483  | no | 0.0931 | NA    | 0.002 | 0.036 | 0.093 | 0.025 | 0.023 | 0.123 | 0.155 | 0.021 | 0.069 |
| hsa-miR-484  | no | 0.0633 | 0.018 | 0.000 | 0.000 | 0.030 | 0.074 | 0.036 | 0.063 | 0.141 | 0.052 | 0.036 |
| hsa-miR-485  | no | 0.0116 | 0.002 | NA    | NA    | 0.042 | 0.005 | 0.012 | 0.000 | 0.010 | 0.014 | 0.003 |
| hsa-miR-486  | no | 0.0278 | 0.025 | 0.005 | 0.001 | 0.045 | 0.011 | 0.013 | 0.028 | 0.063 | 0.017 | 0.027 |
| hsa-miR-487b | no | 0.0046 | 0.004 | NA    | NA    | NA    | 0.000 | 0.017 | 0.000 | 0.004 | 0.037 | 0.005 |
| hsa-miR-491  | no | 0.0168 | 0.008 | NA    | NA    | 0.003 | 0.064 | 0.009 | 0.012 | 0.011 | 0.027 | 0.017 |
| hsa-miR-493  | no | 0.0068 | 0.000 | NA    | NA    | NA    | 0.001 | 0.002 | 0.005 | 0.002 | 0.000 | 0.021 |
| hsa-miR-494  | no | 0.0025 | 0.000 | NA    | NA    | NA    | 0.002 | 0.003 | 0.001 | 0.020 | 0.010 | NA    |
| hsa-miR-495  | no | 0.0061 | 0.000 | NA    | NA    | 0.036 | 0.000 | 0.004 | 0.005 | 0.006 | 0.020 | 0.001 |
| hsa-miR-496  | no | 0.0106 | 0.015 | NA    | NA    | NA    | 0.001 | 0.005 | 0.000 | 0.002 | 0.017 | 0.011 |
| hsa-miR-497  | no | 0.1081 | 0.023 | 0.001 | 0.000 | 0.008 | 0.074 | 0.031 | 0.346 | 0.108 | 0.108 | 0.127 |
| hsa-miR-511  | no | 0.0119 | 0.015 | NA    | NA    | 0.001 | 0.012 | 0.009 | 0.003 | 0.001 | 0.012 | 0.003 |
| hsa-miR-519a | no | 0.0034 | NA    | NA    | NA    | NA    | 0.001 | NA    | 0.003 | 0.036 | 0.003 | 0.006 |
| hsa-miR-526b | no | 0.0003 | 0.002 | NA    | NA    | NA    | 0.000 | NA    | NA    | 0.013 | 0.000 | NA    |
| hsa-miR-539  | no | 0.0091 | 0.009 | NA    | NA    | 0.049 | 0.002 | 0.013 | 0.000 | 0.009 | 0.004 | 0.003 |
| hsa-miR-551b | no | 0.0173 | 0.005 | NA    | NA    | NA    | 0.001 | NA    | 0.034 | 0.010 | 0.017 | 0.029 |
| hsa-miR-574  | no | 0.0584 | 0.009 | 0.058 | 0.009 | 0.020 | 0.035 | 0.094 | 0.023 | 0.047 | 0.063 | 0.037 |
| hsa-miR-576  | no | 0.0213 | 0.011 | 0.021 | 0.017 | 0.018 | 0.099 | 0.003 | 0.021 | 0.084 | 0.014 | 0.010 |
| hsa-miR-577  | no | 0.1568 | 0.015 | 0.000 | 0.084 | 0.053 | 0.172 | 0.164 | 0.078 | 0.100 | 0.157 | 0.121 |
| hsa-miR-582  | no | 0.1003 | 0.018 | 0.003 | 0.003 | 0.108 | 0.054 | 0.043 | 0.051 | 0.166 | 0.071 | 0.090 |
| hsa-miR-584  | no | 0.2579 | 0.004 | 0.000 | 0.281 | 0.043 | 0.126 | 0.215 | 0.029 | 0.258 | 0.311 | 0.088 |
| hsa-miR-589  | no | 0.056  | NA    | NA    | NA    | 0.001 | 0.080 | 0.060 | 0.018 | 0.007 | 0.033 | 0.056 |
| hsa-miR-592  | no | 0.1114 | 0.015 | 0.051 | 0.278 | 0.126 | 0.023 | 0.014 | 0.111 | 0.045 | 0.057 | 0.011 |
| hsa-miR-598  | no | 0.2488 | 0.008 | NA    | NA    | 0.198 | 0.072 | 0.137 | 0.277 | 0.249 | 0.192 | 0.317 |
| hsa-miR-615  | no | 0.1722 | NA    | 0.033 | NA    | 0.020 | 0.172 | 0.055 | 0.086 | 0.199 | 0.080 | 0.258 |
| hsa-miR-616  | no | 0.0355 | NA    | NA    | 0.055 | 0.030 | 0.245 | 0.036 | 0.013 | NA    | 0.004 | 0.028 |
| hsa-miR-625  | no | 0.0949 | NA    | 0.042 | 0.019 | 0.108 | 0.027 | 0.095 | 0.140 | 0.002 | 0.017 | 0.075 |
| hsa-miR-627  | no | 0.0269 | 0.011 | 0.004 | 0.021 | NA    | 0.036 | NA    | 0.011 | 0.037 | 0.027 | 0.019 |
| hsa-miR-628  | no | 0.1111 | 0.046 | 0.000 | 0.028 | 0.038 | 0.180 | 0.049 | 0.118 | 0.111 | 0.006 | 0.005 |
| hsa-miR-629  | no | 0.0443 | 0.012 | 0.068 | 0.038 | 0.027 | 0.009 | 0.035 | 0.044 | 0.131 | 0.042 | 0.024 |
| hsa-miR-653  | no | 0.0578 | 0.004 | NA    | 0.006 | 0.039 | 0.015 | 0.034 | 0.058 | 0.116 | 0.039 | 0.065 |
| hsa-miR-654  | no | 0.022  | NA    | NA    | NA    | NA    | NA    | 0.006 | 0.001 | 0.000 | 0.009 | 0.004 |
| hsa-miR-655  | no | 0.0091 | 0.009 | NA    | NA    | NA    | 0.001 | 0.009 | 0.000 | 0.000 | 0.012 | 0.009 |
| hsa-miR-671  | no | 0.0725 | 0.001 | NA    | NA    | 0.073 | 0.113 | 0.038 | 0.028 | 0.094 | 0.016 | 0.019 |
| hsa-miR-7    | no | 0.0405 | NA    | 0.003 | 0.013 | 0.026 | 0.026 | 0.024 | 0.017 | 0.113 | 0.048 | 0.041 |
| hsa-miR-708  | no | 0.1196 | NA    | NA    | NA    | 0.112 | 0.118 | 0.044 | 0.282 | 0.058 | 0.181 | 0.028 |
| hsa-miR-744  | no | 0.1048 | NA    | 0.013 | 0.059 | 0.009 | 0.129 | 0.036 | 0.105 | 0.217 | 0.097 | 0.003 |
| hsa-miR-758  | no | 0.017  | 0.000 | NA    | NA    | 0.061 | 0.004 | 0.021 | 0.001 | 0.000 | 0.016 | 0.017 |
| hsa-miR-760  | no | 0.0224 | NA    | NA    | NA    | NA    | 0.026 | NA    | 0.022 | 0.035 | 0.001 | 0.016 |

|             |    |        |       |       |       |       |       |       |       |       |       |       |
|-------------|----|--------|-------|-------|-------|-------|-------|-------|-------|-------|-------|-------|
| hsa-miR-769 | no | 0.0458 | 0.009 | NA    | NA    | NA    | 0.119 | NA    | 0.023 | 0.044 | NA    | 0.032 |
| hsa-miR-874 | no | 0.067  | NA    | NA    | NA    | 0.036 | 0.017 | 0.032 | 0.076 | 0.097 | 0.067 | 0.025 |
| hsa-miR-877 | no | 0.0587 | NA    | 0.000 | NA    | NA    | 0.070 | NA    | 0.059 | 0.096 | 0.018 | 0.044 |
| hsa-miR-887 | no | 0.0476 | NA    | NA    | NA    | 0.046 | 0.022 | 0.008 | 0.048 | 0.053 | 0.054 | 0.042 |
| hsa-miR-889 | no | 0.0154 | NA    | NA    | NA    | 0.054 | 0.000 | 0.015 | 0.004 | 0.003 | 0.016 | 0.009 |
| hsa-miR-9   | no | 0.1454 | 0.106 | 0.044 | NA    | 0.040 | 0.055 | 0.057 | 0.360 | 0.058 | 0.183 | 0.145 |
| hsa-miR-92b | no | 0.0896 | 0.004 | NA    | NA    | 0.011 | 0.034 | 0.018 | 0.090 | 0.193 | 0.090 | 0.053 |
| hsa-miR-940 | no | 0.0598 | NA    | NA    | NA    | NA    | 0.126 | NA    | 0.011 | 0.256 | 0.060 | 0.012 |
| hsa-miR-95  | no | 0.0604 | 0.038 | NA    | NA    | 0.026 | 0.060 | 0.038 | 0.066 | 0.025 | 0.024 | 0.094 |
| hsa-miR-96  | no | 0.083  | 0.001 | NA    | NA    | NA    | 0.193 | NA    | 0.061 | 0.192 | 0.083 | 0.044 |
| hsa-miR-99a | no | 0.0297 | NA    | 0.016 | NA    | 0.005 | 0.147 | 0.030 | 0.018 | 0.001 | 0.258 | 0.004 |
| hsa-miR-99b | no | 0.0554 | 0.001 | NA    | NA    | NA    | 0.066 | NA    | 0.007 | 0.159 | 0.046 | 0.019 |
| hsa-let7a   | no | 0.0621 | NA    | NA    | NA    | 0.005 | 0.031 | 0.005 | 0.078 | 0.016 | 0.072 | 0.029 |
| hsa-let7c   | no | 0.0266 | 0.019 | 0.006 | 0.005 | 0.020 | 0.124 | 0.027 | 0.015 | 0.011 | 0.184 | 0.017 |
| hsa-let7d   | no | 0.0132 | 0.001 | NA    | NA    | 0.001 | 0.155 | 0.025 | 0.003 | 0.008 | 0.013 | 0.008 |
| hsa-let7e   | no | 0.0708 | NA    | NA    | NA    | NA    | 0.065 | NA    | 0.119 | 0.179 | 0.071 | 0.016 |
| hsa-let7f   | no | 0.0244 | NA    | NA    | NA    | 0.012 | 0.004 | 0.008 | 0.001 | 0.051 | 0.000 | 0.006 |
| hsa-let7g   | no | 0.1185 | NA    | NA    | NA    | 0.031 | 0.235 | 0.003 | 0.173 | 0.119 | 0.033 | 0.093 |
| hsa-let7i   | no | 0.0394 | 0.015 | NA    | NA    | NA    | 0.058 | NA    | 0.025 | 0.284 | 0.036 | 0.039 |
